# Supplementary material for: Copper-catalyzed diamination of unactivated alkenes with hydroxylamines
Source: Royal Society of Chemistry journal article supplement (doi:10.1039/c5sc00897b), 2015-01-01

## Copper-Catalyzed Diamination of Unactivated Alkenes with Hydroxylamines

Kun Shen and Qiu Wang\*

Department of Chemistry, Duke University, Durham, North Carolina 27708

Email: qiu.wang@duke.edu

### Supporting Information

#### Content

|                                                             |         |
|-------------------------------------------------------------|---------|
| <b>I. General Procedures</b>                                | S1      |
| <b>II. Materials and Instrumentation</b>                    | S1      |
| <b>III. Supplementary Tables for Condition Optimization</b> | S2-3    |
| <b>IV. Substrate Synthesis</b>                              | S3-8    |
| <b>V. General Procedure for Diamination Reaction</b>        | S8-14   |
| <b>VI. Mechanism Investigation</b>                          | S14-15  |
| <b>VII. Deprotection Conditions for 3aa</b>                 | S15-16  |
| <b>VIII. Synthesis of (±)-FAUC-179</b>                      | S16-17  |
| <b>IX. References</b>                                       | S17     |
| <b>X. NMR Spectra</b>                                       | S18-106 |

**I. General Procedures.** Glassware and stir bars were dried in an oven at 140 °C for at least 12 h and then cooled in a desiccator cabinet over Drierite prior to use. Optimization and substrate screens were performed in 8-mL microwave vials. Vials were fitted with crimp top septa under a positive pressure of nitrogen that had been passed through a column (5 x 20 cm) of Drierite, unless otherwise noted. All other reactions were performed in round-bottom flasks sealed with rubber septa. Plastic syringes or glass pipets were used to transfer liquid reagents. Reactions were stirred magnetically using Teflon-coated, magnetic stir bars. Analytical thin-layer chromatography (TLC) was performed using aluminum plates pre-coated with 0.25 mm of 230–400 mesh silica gel impregnated with a fluorescent indicator (254 nm). TLC plates were visualized by exposure to ultraviolet light and/or exposure to KMnO<sub>4</sub> stain. Organic solutions were concentrated under reduced pressure using a rotary evaporator. Flash-column chromatography was performed on silica gel (60 Å, standard grade) or with pre-packed FLASH silica gel columns.

**II. Materials and Instrumentation.** Nuclear magnetic resonance spectra were recorded at ambient temperature (unless otherwise stated) on 400 MHz or 500 MHz spectrometers. All values for proton chemical shifts are reported in parts per million ( $\delta$ ) and are referenced to the residual protium in CDCl<sub>3</sub> ( $\delta$  7.26). All values for carbon chemical shifts are reported in parts per million ( $\delta$ ) and are referenced to the carbon resonances in CDCl<sub>3</sub> ( $\delta$  77.0). NMR data are represented as follows: chemical shift, multiplicity (s = singlet, d = doublet, t = triplet, q = quartet, quin = quintet, m = multiplet, br = broad), coupling constant (Hz), and integration. Infrared spectroscopic data are reported in wavenumbers (cm<sup>-1</sup>). High-resolution mass spectra were obtained using a liquid chromatography-electrospray ionization and Time-of-flight mass spectrometer.

### III. Supplementary Tables for Condition Optimization

#### a. Condition optimizations for the diamination of alkene **1a** and hydroxylmorpholine **2a**<sup>a</sup>

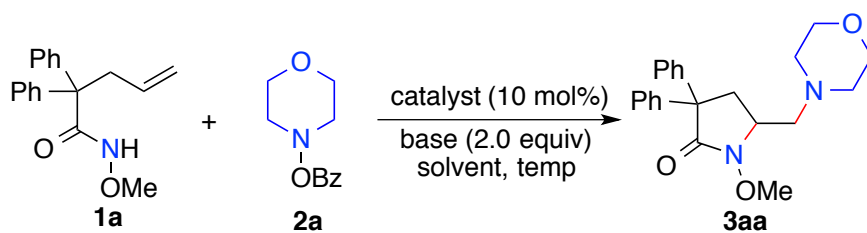

| entry           | catalyst                             | base                            | solvent            | temp (°C) | yield (%) <sup>b</sup>     |
|-----------------|--------------------------------------|---------------------------------|--------------------|-----------|----------------------------|
| 1               | Cu(OAc) <sub>2</sub>                 | K <sub>2</sub> CO <sub>3</sub>  | toluene            | 80        | 68                         |
| 2               | Cu(OAc) <sub>2</sub>                 | K <sub>2</sub> CO <sub>3</sub>  | THF                | 80        | 74                         |
| 3               | Cu(OAc) <sub>2</sub>                 | K <sub>2</sub> CO <sub>3</sub>  | DCE                | 80        | 48                         |
| 4               | Cu(OAc) <sub>2</sub>                 | K <sub>2</sub> CO <sub>3</sub>  | CH <sub>3</sub> CN | 80        | 70                         |
| <b>5</b>        | <b>Cu(OAc)<sub>2</sub></b>           | K <sub>2</sub> CO <sub>3</sub>  | MTBE               | 80        | <b>84 (80)<sup>c</sup></b> |
| 6               | Cu(OAc) <sub>2</sub>                 | K <sub>2</sub> CO <sub>3</sub>  | DMF                | 80        | trace                      |
| 7               | Cu(CF <sub>3</sub> COO) <sub>2</sub> | K <sub>2</sub> CO <sub>3</sub>  | MTBE               | 80        | 60                         |
| 8               | Cu(OTf) <sub>2</sub>                 | K <sub>2</sub> CO <sub>3</sub>  | MTBE               | 80        | 46                         |
| 9               | Cu(acac) <sub>2</sub>                | K <sub>2</sub> CO <sub>3</sub>  | MTBE               | 80        | 24                         |
| 10              | CuCl <sub>2</sub>                    | K <sub>2</sub> CO <sub>3</sub>  | MTBE               | 80        | 39                         |
| 11              | CuF <sub>2</sub>                     | K <sub>2</sub> CO <sub>3</sub>  | MTBE               | 80        | trace                      |
| 12              | CuOAc                                | K <sub>2</sub> CO <sub>3</sub>  | MTBE               | 80        | 60                         |
| 13              | -                                    | K <sub>2</sub> CO <sub>3</sub>  | MTBE               | 80        | 0                          |
| 14              | Cu(OAc) <sub>2</sub>                 | -                               | MTBE               | 80        | 60                         |
| 15              | Cu(OAc) <sub>2</sub>                 | Na <sub>2</sub> CO <sub>3</sub> | MTBE               | 80        | 58                         |
| 16              | Cu(OAc) <sub>2</sub>                 | Cs <sub>2</sub> CO <sub>3</sub> | MTBE               | 80        | 0                          |
| 17 <sup>d</sup> | Cu(OAc) <sub>2</sub>                 | K <sub>2</sub> CO <sub>3</sub>  | MTBE               | 40        | 0                          |
| 18 <sup>d</sup> | Cu(OAc) <sub>2</sub>                 | K <sub>2</sub> CO <sub>3</sub>  | MTBE               | 60        | 44                         |
| 19              | Cu(OAc) <sub>2</sub>                 | K <sub>2</sub> CO <sub>3</sub>  | MTBE               | 100       | 74                         |

<sup>a</sup>Reaction Conditions: The reactions were performed in a sealed tube with **1a** (0.20 mmol, 1.0 equiv), **2a** (0.24 mmol, 1.2 equiv), catalyst (0.02 mmol, 10 mol%), base (0.40 mmol, 2.0 equiv) and solvent (1 mL) for 2 h, unless otherwise noted. <sup>b</sup>The yield was determined by <sup>1</sup>H NMR with dibromomethane as an internal standard. <sup>c</sup>The number in the parathesis was the isolation yield. <sup>d</sup>The reaction was run for 4 h.

**b. Condition optimization for the diamination reaction of 1a and *N,N*-diethyl-*O*-benzoyl hydroxylamine 2g<sup>a</sup>**

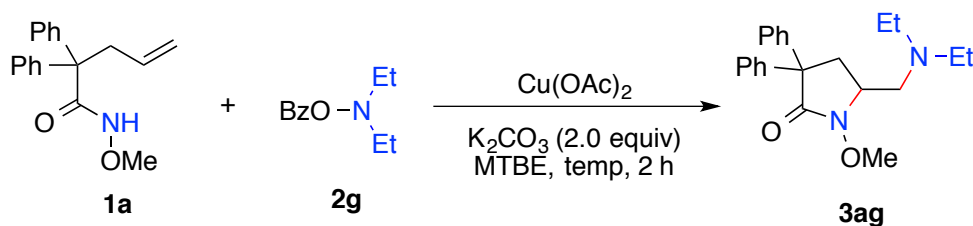

| entry | Cu(OAc) <sub>2</sub> (mol%) | 2g (equiv) | temp (°C)  | yield (%) <sup>b</sup> |
|-------|-----------------------------|------------|------------|------------------------|
| 1     | 10                          | 1.2        | 80         | 22                     |
| 2     | 20                          | 1.2        | 80         | 24                     |
| 3     | 40                          | 1.2        | 80         | 23                     |
| 4     | 10                          | 1.2        | 120        | 36                     |
| 5     | 20                          | 1.2        | 120        | 41                     |
| 6     | 40                          | 1.2        | 120        | 37                     |
| 7     | 20                          | 2.0        | 80         | 31                     |
| 8     | <b>20</b>                   | <b>2.0</b> | <b>120</b> | <b>54</b>              |

<sup>a</sup>Reaction were performed in a 0.1 mmol scale. <sup>b</sup>The yield was determined by <sup>1</sup>H NMR with diboromethane as an internal standard.

**IV. Synthesis of Substrates.**

***N*-Methoxy-2,2-diphenylpent-4-enamide (1a).**

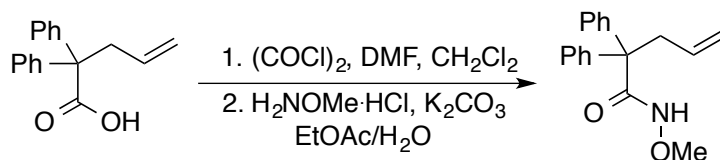

To a solution of 2,2-diphenylpent-4-enoic acid (5.04 g, 20 mmol) in CH<sub>2</sub>Cl<sub>2</sub> (20 mL) was added dropwise oxalyl chloride (2.2 mL, 26 mmol) followed by a catalytic amount of DMF. The mixture was stirred at room temperature for 1 h, and then was concentrated under reduced pressure to remove the solvent. The resulting residue was added dropwise to a biphasic mixture of MeONH<sub>2</sub>·HCl (2.51 g, 30 mmol) and K<sub>2</sub>CO<sub>3</sub> (5.52 g, 40 mmol) in EtOAc (36 mL) and H<sub>2</sub>O (18 mL). The reaction was stirred at room temperature for 2 h. The organic layer was separated and the aqueous layer was extracted with EtOAc. The combined extracts were washed with brine, dried over Na<sub>2</sub>SO<sub>4</sub>, and filtrated. The filtrate was concentrated. Purification by column chromatography (33% EtOAc in hexanes) gave **1a** as a white solid (5.0 g, 89% yield); *R*<sub>f</sub> = 0.55 (50% EtOAc in EtOAc in hexanes); <sup>1</sup>H NMR (400 MHz, CDCl<sub>3</sub>): δ 8.16 (s, 1H), 7.45–7.15 (m, 10H), 5.85–5.65 (m, 1H), 4.99 (d, *J* = 17.6 Hz, 1H), 4.95 (d, *J* = 11.6 Hz, 1H), 3.66 (s, 3H), 3.20 (d, *J* = 6.8 Hz, 2H); <sup>13</sup>C NMR (100 MHz, CDCl<sub>3</sub>): δ 171.9, 141.9, 134.5, 128.7, 128.3, 127.1, 118.2, 64.0, 58.9, 43.2; IR (neat): 3272, 1650, 1488, 1442, 906, 733, 699 cm<sup>-1</sup>; HRMS (*m/z*) Calcd for (C<sub>18</sub>H<sub>20</sub>NO<sub>2</sub>) ([M+H]<sup>+</sup>): 282.1489; found: 282.1486.

***N*-(Benzyloxy)-2,2-diphenylpent-4-enamide (1b).**

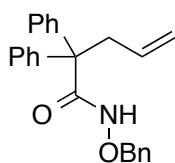

Follow the same procedure with **1a**. Purification by column chromatography (33% EtOAc in hexanes) gave **1b** as a yellow solid (91% yield); *R*<sub>f</sub> = 0.42 (20% EtOAc in hexanes); <sup>1</sup>H NMR (400 MHz, CDCl<sub>3</sub>): δ 8.12 (s,

1H), 7.38–7.18 (m, 15H), 5.85–5.65 (m, 1H), 4.99 (d,  $J = 11.6$  Hz, 1H), 4.97–4.92 (m, 1H), 4.85 (s, 2H), 3.22 (d,  $J = 6.8$  Hz, 2H);  $^{13}\text{C}$  NMR (100 MHz,  $\text{CDCl}_3$ ):  $\delta$  171.3, 141.8, 134.8, 134.4, 129.1, 128.6, 128.4, 128.3, 128.1, 126.9, 118.0, 77.7, 58.9, 43.0; IR (neat): 3261, 3063, 3033, 1646, 1491, 1464, 1441, 917, 745,  $691\text{ cm}^{-1}$ ; HRMS ( $m/z$ ) Calcd for ( $\text{C}_{24}\text{H}_{24}\text{NO}_2$ ) ( $[\text{M}+\text{H}]^+$ ): 358.1802; found: 358.1802.

***N*-Benzyl-2,2-diphenylpent-4-enamide (1d).**

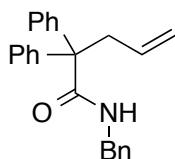

Follow the same procedure with **1a**. Purification by column chromatography (15% EtOAc in hexanes) gave **1d** as a yellow solid (88% yield);  $R_f = 0.54$  (20% EtOAc in hexanes);  $^1\text{H}$  NMR (400 MHz,  $\text{CDCl}_3$ ):  $\delta$  7.34–7.28 (m, 8H), 7.28–7.20 (m, 5H), 7.10–7.03 (m, 2H), 5.86 (s, br, 1H), 5.81–5.69 (m, 1H), 5.02–4.89 (m, 2H), 4.44 (d,  $J = 5.6$  Hz, 2H), 3.25 (d,  $J = 6.8$  Hz, 2H);  $^{13}\text{C}$  NMR (100 MHz,  $\text{CDCl}_3$ ):  $\delta$  173.9, 142.8, 138.1, 135.1, 129.0, 128.5, 128.2, 127.3, 127.2, 126.9, 117.8, 60.6, 43.7, 43.3; IR (neat): 3332, 3060, 3026, 1643, 1524, 1247, 733,  $694\text{ cm}^{-1}$ ; HRMS ( $m/z$ ) Calcd for ( $\text{C}_{24}\text{H}_{24}\text{NO}$ ) ( $[\text{M}+\text{H}]^+$ ): 342.1852; found: 342.1853.

***N*-Methoxy-2,2-dimethylpent-4-enamide (1f).**

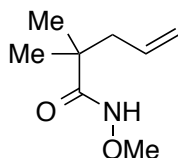

Follow the same procedure with **1a**. Purification by column chromatography (25% EtOAc in hexanes) gave **1f** as a yellow oil (55% yield);  $R_f = 0.31$  (50% EtOAc in hexanes);  $^1\text{H}$  NMR (400 MHz,  $\text{CDCl}_3$ ):  $\delta$  9.72 (s, 1H), 5.71–5.55 (m, 1H), 4.98–4.88 (m, 2H), 3.60 (s, 3H), 2.17 (d,  $J = 7.6$  Hz, 2H), 1.06 (s, 3H);  $^{13}\text{C}$  NMR (100 MHz,  $\text{CDCl}_3$ ):  $\delta$  174.8, 133.7, 117.8, 63.4, 44.6, 40.8, 24.3; IR (neat): 3212, 2970, 2934, 1640, 1498, 1473, 1048, 908,  $575\text{ cm}^{-1}$ ; HRMS ( $m/z$ ) Calcd for ( $\text{C}_8\text{H}_{16}\text{NO}_2$ ) ( $[\text{M}+\text{H}]^+$ ): 158.1176; found: 158.1176.

**1-Allyl-*N*-methoxycyclohexane-1-carboxamide (1g).**

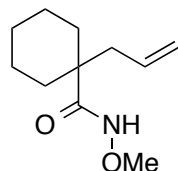

Follow the same procedure with **1a**. Purification by column chromatography (25% EtOAc in hexanes) gave **1g** as a yellow oil (54% yield);  $R_f = 0.48$  (50% EtOAc in hexanes);  $^1\text{H}$  NMR (400 MHz,  $\text{CDCl}_3$ ):  $\delta$  9.61 (s, 1H), 5.70–5.56 (m, 1H), 4.92 (d,  $J = 16.0$  Hz, 1H), 4.90 (d,  $J = 11.2$  Hz, 1H), 3.61 (s, 3H), 2.14 (d,  $J = 7.2$  Hz, 2H), 1.93–1.79 (m, 2H), 1.51–1.09 (m, 8H);  $^{13}\text{C}$  NMR (100 MHz,  $\text{CDCl}_3$ ):  $\delta$  173.3, 133.3, 117.6, 63.5, 45.1, 43.9, 33.1, 25.5, 22.4; IR (neat): 3142, 2925, 1636, 1520, 1435, 1047, 901,  $619\text{ cm}^{-1}$ ; HRMS ( $m/z$ ) Calcd for ( $\text{C}_{11}\text{H}_{20}\text{NO}_2$ ) ( $[\text{M}+\text{H}]^+$ ): 198.1489; found: 198.1488.

**2-Allyl-*N*-methoxy-1,3-dithiane-2-carboxamide (1h).**

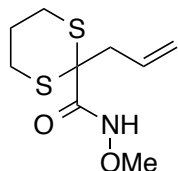

Follow the same procedure with **1a**. Purification by column chromatography (50% EtOAc in hexanes) gave **1h** as a white solid (47% yield);  $R_f = 0.17$  (50% EtOAc in hexanes);  $^1\text{H}$  NMR (400 MHz,  $\text{CDCl}_3$ ):  $\delta$  9.73 (s, 1H), 5.86–5.72 (m, 1H), 5.22–5.12 (m, 2H), 3.78 (s, 3H), 2.96 (dd,  $J = 12.4, 2.8$  Hz, 1H), 2.92 (dd,  $J = 12.4, 2.8$  Hz, 1H), 2.72 (dd,  $J = 4.4, 3.2$  Hz, 1H), 2.69 (dd,  $J = 4.4, 3.2$  Hz, 1H), 2.66 (dt,  $J = 7.6, 0.8$  Hz, 2H), 2.14–2.03 (m, 1H), 1.92–1.77 (m, 1H);  $^{13}\text{C}$  NMR (100 MHz,  $\text{CDCl}_3$ ):  $\delta$  166.5, 129.9, 119.6, 63.7, 56.0, 44.2,



27.9, 23.7; IR (neat): 3273, 2932, 2905, 1661, 1481, 1415, 1045, 992, 926, 730, 661, 534  $\text{cm}^{-1}$ ; HRMS (m/z) Calcd for ( $\text{C}_9\text{H}_{16}\text{NO}_2\text{S}_2$ ) ( $[\text{M}+\text{H}]^+$ ): 234.0617; found: 234.0617.

### *N*-Methoxy-2,2,4-trimethylpent-4-enamide (**1k**).

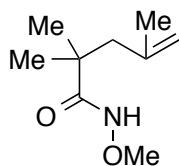

Follow the same procedure with **1a**. Purification by column chromatography (33% EtOAc in hexanes) gave **1k** as a yellow oil (67% yield);  $R_f$  = 0.31 (50% EtOAc in hexanes);  $^1\text{H}$  NMR (400 MHz,  $\text{CDCl}_3$ ):  $\delta$  8.59 (s, 1H), 4.82–4.79 (m, 1H), 4.68–4.64 (m, 1H), 3.71 (s, 3H), 2.27 (s, 2H), 1.67 (s, 3H), 1.15 (s, 6H);  $^{13}\text{C}$  NMR (100 MHz,  $\text{CDCl}_3$ ):  $\delta$  175.4, 142.3, 114.6, 64.0, 48.3, 41.1, 25.4, 23.8; IR (neat): 3212, 2967, 2934, 1642, 1497, 1472, 1052, 890, 585, 539  $\text{cm}^{-1}$ ; HRMS (m/z) Calcd for ( $\text{C}_9\text{H}_{18}\text{NO}_2$ ) ( $[\text{M}+\text{H}]^+$ ): 172.1332; found: 172.1332.

### 2-Allyl-*N*-methoxybenzamide (**1l**).

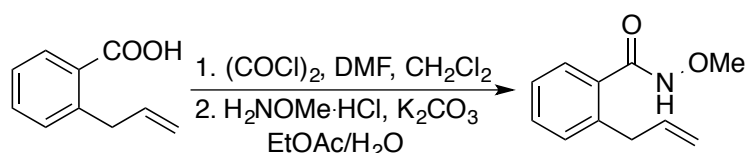

Follow the same procedure with **1a**. 2-Allylbenzoic acid was synthesized according to literature procedure<sup>1</sup>. Purification by column chromatography (33% EtOAc in hexanes) gave **1l** as a white solid (45% yield);  $R_f$  = 0.38 (50% EtOAc in hexanes);  $^1\text{H}$  NMR (400 MHz,  $\text{CDCl}_3$ ):  $\delta$  9.53 (s, 1H), 7.37 (t,  $J$  = 7.6 Hz, 1H), 7.30 (d,  $J$  = 7.6 Hz, 1H), 7.23 (d,  $J$  = 7.6 Hz, 1H), 7.18 (t,  $J$  = 7.6 Hz, 1H), 6.00–5.87 (m, 1H), 5.10–4.95 (m, 2H), 3.77 (s, 3H), 3.49 (d,  $J$  = 6.4 Hz, 2H);  $^{13}\text{C}$  NMR (100 MHz,  $\text{CDCl}_3$ ):  $\delta$  167.4, 138.4, 137.0, 132.5, 130.4, 130.2, 127.5, 126.0, 116.0, 64.0, 37.0; IR (neat): 3123, 2935, 2820, 1633, 1529, 1316, 1039, 902, 746  $\text{cm}^{-1}$ ; HRMS (m/z) Calcd for ( $\text{C}_{11}\text{H}_{14}\text{NO}_2$ ) ( $[\text{M}+\text{H}]^+$ ): 192.1019; found: 192.1019.

### *N*-Methoxy-3,3-dimethylpent-4-enamide (**1i**).

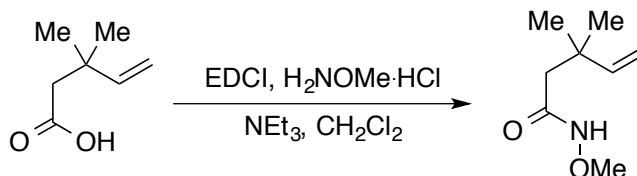

To a solution of 3,3-dimethylpent-4-enoic acid (1.28 g, 10 mmol) in  $\text{CH}_2\text{Cl}_2$  (10 mL), was added sequentially triethylamine (2.2 mL, 16 mmol), EDCI (3.44 g, 18 mmol) and  $\text{MeONH}_2\cdot\text{HCl}$  (1.33 g, 16 mmol). The resulting mixture was stirred at room temperature overnight and then was filtered through a pale of Celite. The filtrate was concentrated. Purification by column chromatography (33% EtOAc in hexanes) gave **1i** as a colorless oil (68% yield);  $R_f$  = 0.28 (50% EtOAc in hexanes);  $^1\text{H}$  NMR (400 MHz,  $\text{CDCl}_3$ ):  $\delta$  9.21 (s, br, 1H), 5.85 (dd,  $J$  = 17.6, 10.8 Hz, 1H), 4.95 (d,  $J$  = 17.6 Hz, 1H), 4.93 (d,  $J$  = 10.0 Hz, 1H), 3.68 (s, 3H), 2.07 (s, 2H), 1.10 (s, 6H);  $^{13}\text{C}$  NMR (100 MHz,  $\text{CDCl}_3$ ):  $\delta$  168.9, 146.9, 111.2, 64.0, 45.3, 36.2, 26.8; IR (neat): 3170, 2962, 1649, 1515, 1463, 1438, 1364, 1068, 910, 724, 675, 590  $\text{cm}^{-1}$ ; HRMS (m/z) Calcd for ( $\text{C}_8\text{H}_{16}\text{NO}_2$ ) ( $[\text{M}+\text{H}]^+$ ): 158.1176; found: 158.1176.

### 3-Ethyl-*N*-methoxy-2,2-diphenylpent-4-enamide (**1j**).

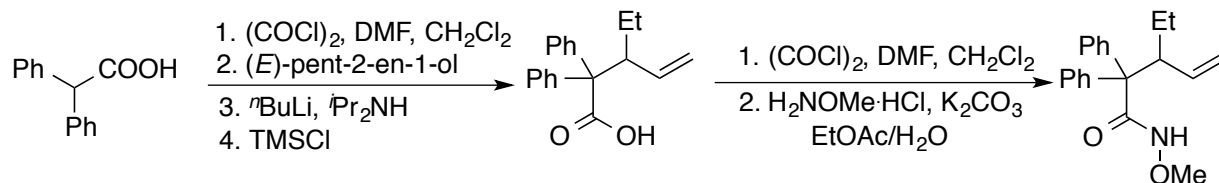

To a solution of 2,2-diphenylacetic acid (2.12 g, 10 mmol) in  $\text{CH}_2\text{Cl}_2$  (10 mL) was added dropwise oxalyl chloride (0.93 mL, 11 mmol) followed by a catalytic amount of DMF. The mixture was stirred at room

temperature for 1 h, and then was added dropwise pyridine (1.76 mL, 22 mmol) and (*E*)-pent-2-en-1-ol (1.22 mL, 12 mmol). The resulting mixture was stirred at room temperature overnight and then was quenched by the addition of a saturated aqueous solution of Na<sub>2</sub>CO<sub>3</sub>. The organic layer was separated and the aqueous layer was extracted with CH<sub>2</sub>Cl<sub>2</sub>. The combined organic layers were washed with brine, dried over Na<sub>2</sub>SO<sub>4</sub>, and filtrated. The filtrate was concentrated, providing the crude ester product which was directly used for the next step. To the solution of the crude ester product in THF (10 mL), was added dropwise at –78 °C the freshly prepared LDA solution (20 mmol, 2 equiv) in THF (15 mL). The reaction mixture was allowed to stir at –78 °C for 1 h and then was added TMSCl (2.7 mL, 21 mmol). The reaction mixture was slowly warmed to room temperature and then stirred at 60 °C overnight. After cooling down to room temperature, the reaction was quenched with an aqueous solution of HCl (2 M). The organic layer was separated and the aqueous layer was extracted with EtOAc. The combined extracts were washed with brine, dried over Na<sub>2</sub>SO<sub>4</sub>, and filtrated. The filtrate was concentrated. Purification by column chromatography (10% EtOAc in hexanes) gave 3-ethyl-2,2-diphenylpent-4-enoic acid as a white solid (1.67 g, 60% yield); *R*<sub>f</sub> = 0.44 (20% EtOAc in hexanes); <sup>1</sup>H NMR (400 MHz, CDCl<sub>3</sub>): δ 7.40–7.16 (m, 10H); 5.34–5.06 (m, 3H), 3.41 (t, *J* = 8.8 Hz, 1H), 1.71–1.54 (m, 1H), 0.89 (t, *J* = 7.2 Hz, 3H), 0.64–0.46 (m, 1H); <sup>13</sup>C NMR (100 MHz, CDCl<sub>3</sub>): δ 179.6, 137.6, 130.9 (2C), 130.1 (2C), 127.6 (2C), 127.03 (2C), 127.00 (2C), 126.8 (2C), 119.0, 64.9, 48.8, 23.5, 12.0; IR (neat): 2935, 2872, 1695, 1264, 1249, 722, 709 cm<sup>–1</sup>; HRMS (*m/z*) Calcd for (C<sub>19</sub>H<sub>20</sub>O<sub>2</sub>) ([*M*+*H*]<sup>+</sup>): 281.1536; found: 281.1536.

To a solution of 3-ethyl-2,2-diphenylpent-4-enoic acid (1.04 g, 3.7 mmol) in CH<sub>2</sub>Cl<sub>2</sub> (5 mL) was added dropwise oxalyl chloride (0.42 mL, 4.9 mmol) followed by a catalytic amount of DMF. The mixture was stirred at room temperature for 1 h, and then was concentrated under reduced pressure. The residue was added dropwise to a biphasic mixture of MeONH<sub>2</sub>·HCl (464 mg, 5.6 mmol) and K<sub>2</sub>CO<sub>3</sub> (1.02 g, 7.4 mmol) in EtOAc (20 mL) and H<sub>2</sub>O (10 mL). The reaction mixture was stirred at room temperature for 2 h. Then the organic layer was separated and the aqueous layer was extracted with EtOAc. The combined extracts were washed with brine, dried over Na<sub>2</sub>SO<sub>4</sub>, and filtrated. The filtrate was concentrated. Purification by column chromatography (33% EtOAc in hexanes) gave **1j** as a yellow oil (520 mg, 46% yield); *R*<sub>f</sub> = 0.59 (50% EtOAc in hexanes); <sup>1</sup>H NMR (400 MHz, CDCl<sub>3</sub>): δ 8.37 (s, 1H), 7.33 (t, *J* = 7.2 Hz, 4H), 7.30–7.18 (m, 6H), 5.48–5.36 (m, 1H), 5.13–5.03 (m, 2H), 3.49 (s, 3H), 3.38 (t, *J* = 9.6 Hz, 1H), 1.75–1.62 (m, 1H), 0.89 (t, *J* = 7.2 Hz, 3H), 0.79–0.65 (m, 1H); <sup>13</sup>C NMR (100 MHz, CDCl<sub>3</sub>): δ 171.2, 140.6, 140.2, 137.6, 130.0, 129.5, 127.7, 127.6, 126.9, 126.8, 118.3, 63.5, 63.4, 50.0, 23.6, 12.0; IR (neat): 3246, 2962, 1654, 1494, 1441, 909, 717, 696 cm<sup>–1</sup>; HRMS (*m/z*) Calcd for (C<sub>20</sub>H<sub>24</sub>NO<sub>2</sub>) ([*M*+*H*]<sup>+</sup>): 310.1802; found: 310.1802.

## 2,2-Diphenyl-*N*-tosylpent-4-enamide (**1c**).

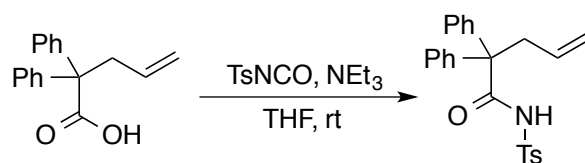

To a solution of 2,2-diphenylpent-4-enoic acid (1.26 g, 5 mmol) in THF (20 mL) was added *p*-tosyl isocyanate (985 mg, 5 mmol), followed by the dropwise addition of triethyl amine (0.7 mL, 5 mmol) with release of gas. The mixture was stirred at room temperature for 3 h, and then was diluted with EtOAc. The organic layer was sequentially washed with an aqueous solution of HCl (2 M), a saturated aqueous solution of NaHCO<sub>3</sub> and brine, dried over Na<sub>2</sub>SO<sub>4</sub>, and filtered. The filtrate was concentrated. Purification by column chromatography (20% EtOAc in hexanes) gave **1c** as a white solid (1.19 g, 59% yield); *R*<sub>f</sub> = 0.46 (20% EtOAc in hexanes); <sup>1</sup>H NMR (400 MHz, CDCl<sub>3</sub>): δ 7.89 (s, 1H), 7.72 (d, *J* = 8.4 Hz, 2H), 7.34–7.22 (m, 8H), 7.17–7.08 (m, 4H), 5.58–5.43 (m, 1H), 4.90–4.79 (m, 2H), 3.04 (d, *J* = 6.8 Hz, 2H), 2.43 (s, 3H); <sup>13</sup>C NMR (100 MHz, CDCl<sub>3</sub>): δ 171.3, 144.9, 140.1, 134.9, 133.3, 129.3, 128.7, 128.6, 128.4, 127.6, 119.0, 61.4, 42.6, 21.6; IR (neat): 3273, 3067, 3026, 1718, 1698, 1398, 1341, 1305, 698, 659, 550 cm<sup>–1</sup>; HRMS (*m/z*) Calcd for (C<sub>24</sub>H<sub>24</sub>NO<sub>3</sub>S) ([*M*+*H*]<sup>+</sup>): 406.1471; found: 406.1471.

## 1-Allyl-1-benzyl-3-methoxyurea (**1m**).

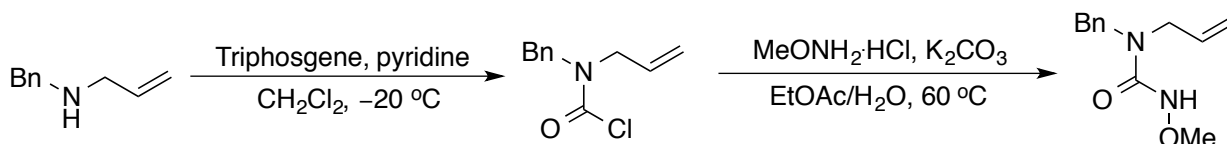

To a solution of triphosgene (7.8 g, 26 mmol) in anhydrous  $\text{CH}_2\text{Cl}_2$  (50 mL) at  $-20\text{ }^\circ\text{C}$ , was added dropwise pyridine (5.2 mL, 52 mmol), followed by a solution of *N*-benzylprop-2-en-1-amine (2.94 g, 20 mmol) in  $\text{CH}_2\text{Cl}_2$  (10 mL). The reaction mixture was stirred at room temperature for 12 h and then was quenched with a saturated aqueous solution of  $\text{NH}_4\text{Cl}$ . The organic layer was separated and the aqueous layer was extracted with  $\text{CH}_2\text{Cl}_2$ . The combined extracts were washed with brine, dried over  $\text{Na}_2\text{SO}_4$ , and filtrated. The filtrate was concentrated, providing the crude carbamoyl chloride product that was directly used for the next step. The crude carbamoyl chloride product was added dropwise to a biphasic mixture of  $\text{MeONH}_2\cdot\text{HCl}$  (2.5 g, 30 mmol) and  $\text{K}_2\text{CO}_3$  (5.52 g, 40 mmol) in EtOAc (30 mL) and  $\text{H}_2\text{O}$  (15 mL). The reaction mixture was stirred at  $60\text{ }^\circ\text{C}$  overnight and then the organic layer was separated. The aqueous layer was extracted with EtOAc. The combined organic layers were washed with brine, dried over  $\text{Na}_2\text{SO}_4$ , and filtrated. The filtrate was concentrated. Purification by column chromatography (50% EtOAc in hexanes) gave **1m** as a yellow solid (2.97 g, 68% yield);  $R_f = 0.33$  (50% EtOAc in hexanes);  $^1\text{H}$  NMR (400 MHz,  $\text{CDCl}_3$ ):  $\delta$  7.51 (s, 1H), 7.31–7.15 (m, 5H), 5.74–5.62 (m, 1H), 5.17–5.07 (m, 2H), 4.11 (s, 2H), 3.74 (d,  $J = 5.6$  Hz, 2H), 3.64 (s, 3H);  $^{13}\text{C}$  NMR (100 MHz,  $\text{CDCl}_3$ ):  $\delta$  159.4, 136.9, 132.8, 128.5, 127.4 (2C), 117.2, 64.0, 49.6, 48.6; IR (neat): 3247, 2992, 2962, 2929, 2890, 1650, 1479, 1250, 943, 693  $\text{cm}^{-1}$ ; HRMS ( $m/z$ ) Calcd for  $(\text{C}_{12}\text{H}_{17}\text{N}_2\text{O}_2)$  ( $[\text{M}+\text{H}]^+$ ): 221.1285; found: 221.1285.

**(S)-1-Benzyl-3-methoxy-1-(4-methylpent-1-en-3-yl) (1n).**

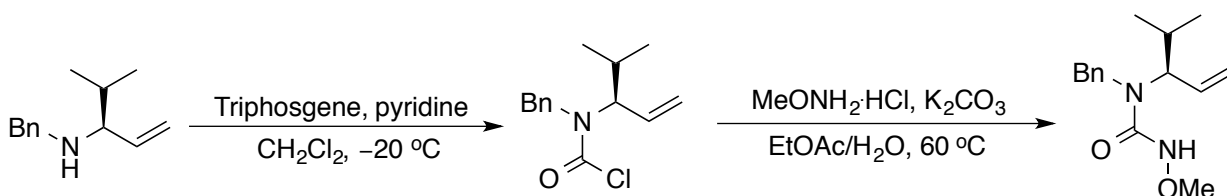

To a solution of triphosgene (1.55 g, 5.2 mmol) in anhydrous  $\text{CH}_2\text{Cl}_2$  (10 mL) at  $-20\text{ }^\circ\text{C}$ , was added dropwise pyridine (1 mL, 10 mmol) followed by a solution of (*S*)-*N*-benzyl-4-methylpent-1-en-3-amine<sup>2</sup> (756 mg, 4 mmol) in  $\text{CH}_2\text{Cl}_2$  (2 mL). The reaction mixture was stirred at room temperature for 9 h, and then was quenched with a saturated aqueous solution of  $\text{NH}_4\text{Cl}$ . The organic layer was separated and the aqueous layer was extracted with  $\text{CH}_2\text{Cl}_2$ . The combined extracts were washed with brine, dried over  $\text{Na}_2\text{SO}_4$ , and filtrated. The filtrate was concentrated, providing the crude carbamoyl chloride product that was directly used for the next step. The crude carbamoyl chloride product was added dropwise to a biphasic mixture of  $\text{MeONH}_2\cdot\text{HCl}$  (501 mg, 6 mmol) and  $\text{K}_2\text{CO}_3$  (1.1 g, 8 mmol) in EtOAc (20 mL) and  $\text{H}_2\text{O}$  (10 mL). The reaction mixture was stirred at  $60\text{ }^\circ\text{C}$  for 14 h and then the organic layer was separated. The aqueous layer was extracted with EtOAc. The combined organic layers were washed with brine, dried over  $\text{Na}_2\text{SO}_4$ , and filtrated. The filtrate was concentrated. Purification by column chromatography (20% EtOAc in hexanes) gave **1n** as a white solid (438 mg, 42% yield);  $[\alpha]_D^{20} = +9.0$  ( $c = 1.0$ ,  $\text{CHCl}_3$ );  $R_f = 0.52$  (50% EtOAc in hexanes);  $^1\text{H}$  NMR (400 MHz,  $\text{CDCl}_3$ ):  $\delta$  7.35–7.20 (m, 5H), 6.96 (s, 1H), 5.75 (ddd,  $J = 17.2, 10.0, 8.4$  Hz, 1H), 5.22 (dd,  $J = 17.2, 0.8$  Hz, 1H), 5.17 (dt,  $J = 10.0, 0.8$  Hz, 1H), 4.36 (d,  $J = 16.8$  Hz, 1H), 4.27 (d,  $J = 16.8$  Hz, 1H), 4.22 (t,  $J = 9.6$  Hz, 1H), 3.56 (s, 3H), 2.04–1.90 (m, 1H), 0.92 (d,  $J = 6.8$  Hz, 3H), 0.89 (d,  $J = 6.8$  Hz, 3H);  $^{13}\text{C}$  NMR (100 MHz,  $\text{CDCl}_3$ ):  $\delta$  159.5, 137.1, 135.7, 128.9, 127.7, 126.7, 118.9, 65.8, 64.0, 47.4, 29.8, 20.1, 19.5; IR (neat): 3205, 2958, 2873, 1728, 1637, 1475, 927, 717, 578  $\text{cm}^{-1}$ ; HRMS ( $m/z$ ) Calcd for  $(\text{C}_{15}\text{H}_{23}\text{N}_2\text{O}_2)$  ( $[\text{M}+\text{H}]^+$ ): 263.1754; found: 263.1754.

**(E)-2,2-dimethylpent-4-enoic-5-*d* acid.**

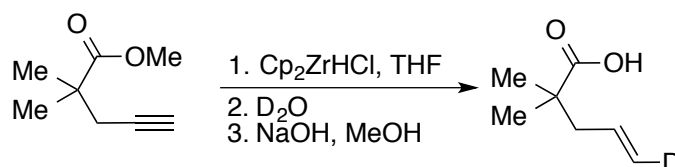

To a suspension of  $\text{Cp}_2\text{ZrHCl}$  (2.55 g, 9.9 mmol) in THF (16 mL) at room temperature under nitrogen, was added dropwise a solution of methyl 2,2-dimethylpent-4-ynoate<sup>3</sup> in THF (2 mL). The reaction was stirred for 2 h and was added  $\text{D}_2\text{O}$  (1 mL). After 24 h, the mixture was concentrated under reduced pressure. To the resulting crude, were added  $\text{NaOH}$  (1.5 g, 37.5 mmol),  $\text{MeOH}$  (10 mL) and  $\text{H}_2\text{O}$  (5 mL) and the resulting reaction mixture was stirred at  $60\text{ }^\circ\text{C}$  for 5 h. After cooling down to room temperature, the reaction mixture was concentrated and then diluted with  $\text{H}_2\text{O}$  (15 mL). The aqueous mixture was washed with EtOAc. The aqueous layer was acidified with a concentrated aqueous solution of  $\text{HCl}$  and extracted with EtOAc. The

organic extracts were washed with brine, dried over Na<sub>2</sub>SO<sub>4</sub>, and filtrated. The filtrate was concentrated. The crude residue was purified by column chromatography (2% ethyl acetate in hexanes) to give the (*E*)-2,2-dimethylpent-4-enoic-5-*d* acid as a yellow oil (550 mg, 48%). *R*<sub>f</sub> = 0.58 (20% EtOAc in hexanes); <sup>1</sup>H NMR (400 MHz, CDCl<sub>3</sub>): δ 11.2 (br, 1H), 5.74 (dt, *J* = 17.2, 7.2 Hz, 1H), 5.03 (dt, *J* = 17.2, 1.2 Hz, 1H), 2.27 (dd, *J* = 17.2, 1.2 Hz, 2H), 1.17 (s, 6H); <sup>13</sup>C NMR (100 MHz, CDCl<sub>3</sub>): δ 184.5, 133.7, 117.9 (t, *J* = 25 Hz), 44.3, 42.1, 24.5; IR (neat): 2972, 2932, 2910, 2875, 1696, 1473, 1283, 1221, 1160, 982, 940, 873, 830, 552 cm<sup>-1</sup>; HRMS (*m/z*) Calcd for (C<sub>5</sub>H<sub>10</sub>DO<sub>2</sub>) ([M-H]<sup>-</sup>): 128.0829; found: 128.0829.

**(*E*)-*N*-Methoxy-2,2-dimethylpent-4-en-5-*d*-amide (*d*-1f).**

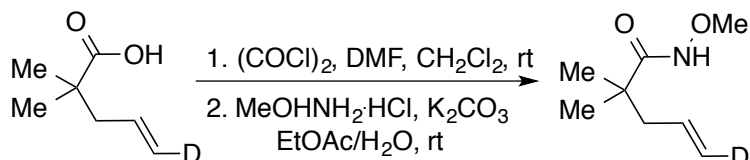

To a solution of (*E*)-2,2-dimethylpent-4-enoic-5-*d* acid (387 mg, 3 mmol) in CH<sub>2</sub>Cl<sub>2</sub> (5 mL), was added dropwise oxalyl chloride (0.33 mL, 3.9 mmol) followed by a catalytic amount of DMF. The mixture was stirred at room temperature for 1 h and then was added dropwise to a biphasic mixture of MeONH<sub>2</sub>·HCl (376 mg, 4.5 mmol) and K<sub>2</sub>CO<sub>3</sub> (828 mg, 6 mmol) in EtOAc (10 mL) and H<sub>2</sub>O (5 mL). The reaction mixture was stirred at room temperature for 2 h. Then the organic layer was separated and the aqueous layer was extracted with EtOAc. The combined extracts were washed with brine, dried over Na<sub>2</sub>SO<sub>4</sub>, and filtrated. The filtrate was concentrated. Purification by column chromatography (25% EtOAc in hexanes) gave **d-1f** as a yellow oil (215 mg, 46% yield); *R*<sub>f</sub> = 0.31 (50% EtOAc in hexanes); <sup>1</sup>H NMR (400 MHz, CDCl<sub>3</sub>): δ 9.30 (s, 1H), 5.66 (dt, *J* = 17.2, 7.6 Hz, 1H), 4.98 (dd, *J* = 17.2, 1.2 Hz, 1H), 3.64 (s, 3H), 2.20 (dd, *J* = 7.6, 1.2 Hz, 2H), 1.09 (s, 6H); <sup>13</sup>C NMR (100 MHz, CDCl<sub>3</sub>): δ 174.9, 133.7, 117.9 (t, *J* = 25 Hz), 63.8, 44.7, 41.0, 24.4; IR (neat): 3212, 2967, 2934, 1645, 1498, 1473, 1048, 982, 903, 592 cm<sup>-1</sup>; HRMS (*m/z*) Calcd for (C<sub>8</sub>H<sub>15</sub>DNO<sub>2</sub>) ([M+H]<sup>+</sup>): 159.1238; found: 159.1238.

**V. General Procedure for Diamination Reaction.**

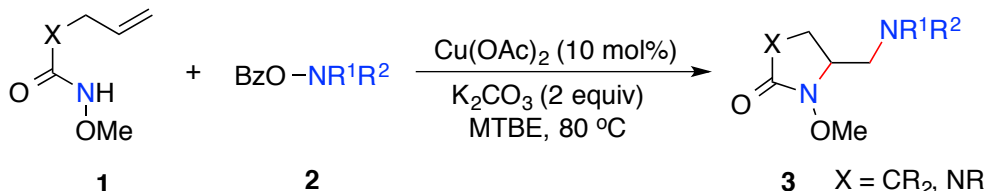

To a reaction tube charged with *N*-methoxylamide **1** (0.3 mmol, 1.0 equiv) and hydroxylamine **2** (0.36 mmol, 1.2 equiv), was added Cu(OAc)<sub>2</sub> (0.03 mmol, 10 mol%), K<sub>2</sub>CO<sub>3</sub> (0.6 mmol, 2.0 equiv) and MTBE (1.5 mL). The reaction tube was capped and the resulting mixture was stirred at 80 °C for 2 h. After cooling down to room temperature, the reaction mixture was diluted with EtOAc (5 mL) and washed with a saturated aqueous solution of Na<sub>2</sub>CO<sub>3</sub> (5 mL). The aqueous layers were extracted with EtOAc (10 mL × 2). The combined organic layers were dried over Na<sub>2</sub>SO<sub>4</sub>, and filtered. The filtrate was concentrated *in vacuo*. The resulting crude mixture was subject to flash column chromatography to provide the diaminated product **3**.

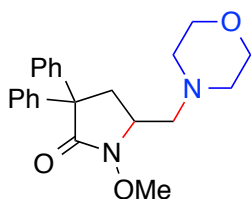

**1-Methoxy-5-(morpholinomethyl)-3,3-diphenylpyrrolidin-2-one (3aa).** Purification by column chromatography (50% EtOAc in hexanes then 50% EtOAc in hexanes containing 2% TEA) gave **3aa** as a yellow oil (87.9 mg, 80% yield); *R*<sub>f</sub> = 0.25 (33% EtOAc in hexanes containing 2% TEA); <sup>1</sup>H NMR (400 MHz, CDCl<sub>3</sub>): δ 7.40–7.16 (m, 10H), 3.92–3.82 (m, 1H), 3.81 (s, 3H), 3.72–3.61 (m, 4H), 2.95 (dd, *J* = 12.8, 6.4 Hz, 1H), 2.75 (dd, *J* = 12.8, 4.0 Hz, 1H), 2.52 (dd, *J* = 12.8, 8.4 Hz, 1H), 2.50–2.40 (m, 5H); <sup>13</sup>C NMR (100 MHz, CDCl<sub>3</sub>): δ 171.9, 143.7, 141.7, 128.4, 128.2, 127.63, 127.62, 127.1, 126.8, 66.8, 62.7, 60.7, 54.3,

54.2, 53.0, 38.2; IR (neat): 2930, 2860, 2820, 1708, 1445, 1278, 1252, 1115, 697  $\text{cm}^{-1}$ ; HRMS (m/z) Calcd for ( $\text{C}_{22}\text{H}_{27}\text{N}_2\text{O}_3$ ) ( $[\text{M}+\text{H}]^+$ ): 367.2016; found: 367.2016.

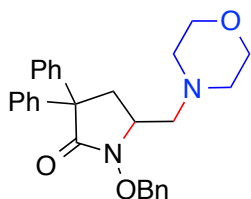

**1-(Benzyloxy)-5-(morpholinomethyl)-3,3-diphenylpyrrolidin-2-one (3ba).** The reaction was runned in a 0.2 mmol scale. Purification by column chromatography (50% EtOAc in hexanes then 50% EtOAc in hexanes containing 2% TEA) gave **3ba** as a yellow oil (65.4 mg, 74% yield);  $R_f$  = 0.32 (33% EtOAc in hexanes containing 2% TEA);  $^1\text{H}$  NMR (400 MHz,  $\text{CDCl}_3$ ):  $\delta$  7.40–7.18 (m, 15H), 5.04 (d,  $J$  = 10.4 Hz, 1H), 4.95 (d,  $J$  = 10.4 Hz, 1H), 3.70–3.57 (m, 4H), 3.57–3.48 (m, 1H), 2.90 (dd,  $J$  = 13.2, 6.4 Hz, 1H), 2.62 (dd,  $J$  = 12.8, 4.0 Hz, 1H), 2.43 (dd,  $J$  = 13.2, 8.0 Hz, 1H), 2.41–2.33 (m, 4H), 2.31 (dd,  $J$  = 12.8, 7.2 Hz, 1H);  $^{13}\text{C}$  NMR (100 MHz,  $\text{CDCl}_3$ ):  $\delta$  171.6, 144.1, 141.6, 135.0, 129.7, 128.8, 128.44, 128.42, 128.2, 127.71, 127.70, 127.1, 126.7, 76.8, 66.8, 60.4, 54.3, 54.1, 53.8, 38.1; IR (neat): 2918, 2850, 1701, 1493, 1445, 1114, 751, 695  $\text{cm}^{-1}$ ; HRMS (m/z) Calcd for ( $\text{C}_{28}\text{H}_{31}\text{N}_2\text{O}_3$ ) ( $[\text{M}+\text{H}]^+$ ): 443.2329; found: 443.2329.

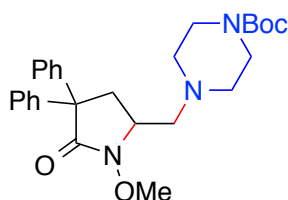

**1-Methoxy-5-(4'-tert-butyloxycarbonylpiperazinomethyl)-3,3-diphenylpyrrolidin-2-one (3ab).** Purification by column chromatography (50% EtOAc in hexanes then 50% EtOAc in hexanes containing 2% TEA) gave **3ab** as a yellow oil (114.4 mg, 82% yield);  $R_f$  = 0.31 (33% EtOAc in hexanes containing 2% TEA);  $^1\text{H}$  NMR (400 MHz,  $\text{CDCl}_3$ ):  $\delta$  7.40–7.15 (m, 10H), 3.90–3.83 (m, 1H), 3.80 (s, 3H), 3.50–3.26 (m, 4H), 2.95 (dd,  $J$  = 13.2, 6.4 Hz, 1H), 2.75 (dd,  $J$  = 12.8, 4.0 Hz, 1H), 2.50 (dd,  $J$  = 13.2, 8.0 Hz, 1H), 2.45 (dd,  $J$  = 12.8, 7.2 Hz, 1H), 2.48–2.34 (m, 4H), 1.43 (s, 9H);  $^{13}\text{C}$  NMR (100 MHz,  $\text{CDCl}_3$ ):  $\delta$  171.9, 154.6, 143.7, 141.6, 128.5, 128.3, 127.64, 127.62, 127.1, 126.8, 79.7, 62.6, 60.3, 54.2, 53.7 (2C), 53.1, 38.2, 28.3; IR (neat): 2975, 2934, 1695, 1421, 1246, 1171, 1006, 699  $\text{cm}^{-1}$ ; HRMS (m/z) Calcd for ( $\text{C}_{27}\text{H}_{36}\text{N}_3\text{O}_4$ ) ( $[\text{M}+\text{H}]^+$ ): 466.2700; found: 466.2698.

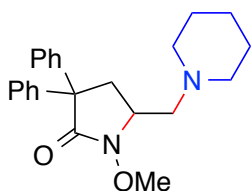

**1-Methoxy-3,3-diphenyl-5-(piperidinomethyl)pyrrolidin-2-one (3ac).** Purification by column chromatography (50% EtOAc in hexanes then 50% EtOAc in hexanes containing 2% TEA) gave **3ac** as a yellow oil (83.0 mg, 76% yield);  $R_f$  = 0.31 (33% EtOAc in hexanes containing 2% TEA);  $^1\text{H}$  NMR (400 MHz,  $\text{CDCl}_3$ ):  $\delta$  7.42–7.16 (m, 10H), 3.90–3.81 (m, 1H), 3.81 (s, 3H), 2.97 (dd,  $J$  = 13.2, 6.4 Hz, 1H), 2.75 (dd,  $J$  = 12.8, 4.4 Hz, 1H), 2.49 (dd,  $J$  = 13.2, 8.0 Hz, 1H), 2.49–2.29 (m, 5H), 1.63–1.47 (m, 4H), 1.40 (q,  $J$  = 5.6 Hz, 2H);  $^{13}\text{C}$  NMR (100 MHz,  $\text{CDCl}_3$ ):  $\delta$  172.0, 143.9, 141.8, 128.4, 128.2, 127.73, 127.69, 127.0, 126.7, 62.7, 61.4, 55.5, 54.3, 53.5, 38.6, 26.0, 24.1; IR (neat): 2935, 2778, 1707, 1444, 1025, 695  $\text{cm}^{-1}$ ; HRMS (m/z) Calcd for ( $\text{C}_{23}\text{H}_{29}\text{N}_2\text{O}_2$ ) ( $[\text{M}+\text{H}]^+$ ): 365.2224; found: 365.2222.

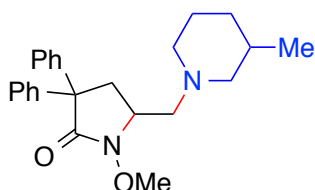

**1-Methoxy-5-(3'-methylpiperidinomethyl)-3,3-diphenylpyrrolidin-2-one (3ad).** Purification by column chromatography (50% EtOAc in hexanes then 50% EtOAc in hexanes containing 2% TEA) gave **3ad** as a yellow oil (79.9 mg, 71% yield, inseparable diastereoisomer, *dr* = 1:1);  $R_f$  = 0.34 (33% EtOAc in hexanes containing 2% TEA);  $^1\text{H}$  NMR (400 MHz,  $\text{CDCl}_3$ ):  $\delta$  7.39–7.22 (m, 10H), 3.93–3.83 (m, 1H), 3.82 (s, 3H), 2.97 (dd,  $J$  = 12.8, 6.0 Hz, 1H), 2.82–2.67 (m, 3H), 2.56–2.44 (m, 1H), 2.37 (dd,  $J$  = 12.8, 7.6 Hz, 1H), 2.03–1.87 (m, 1H), 1.73–1.45 (m, 5H), 0.92–0.78 (m, 1H), 0.85 (d,  $J$  = 6.4 Hz, 3H);  $^{13}\text{C}$  NMR (100 MHz,  $\text{CDCl}_3$ ):  $\delta$  172.0, 171.9, 143.91, 143.89, 141.9, 141.8, 128.4, 128.2, 127.73, 127.69, 127.03, 127.02, 126.7, 63.2, 62.77, 62.75, 62.7, 61.2, 61.1, 55.2, 54.6, 54.26, 54.24, 53.5, 38.62, 38.59, 32.69, 32.67, 31.08, 31.06, 25.48, 25.44, 19.60, 19.58; IR (neat): 2927, 1711, 1494, 1446, 1042, 1027, 761, 698  $\text{cm}^{-1}$ ; HRMS ( $m/z$ ) Calcd for ( $\text{C}_{24}\text{H}_{31}\text{N}_2\text{O}_2$ ) ( $[\text{M}+\text{H}]^+$ ): 379.2380; found: 379.2381.

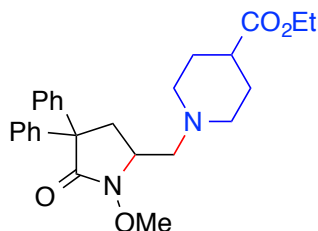

**1-Methoxy-5-(4'-ethoxycarbonylpiperidinomethyl)-3,3-diphenylpyrrolidin-2-one (3ae).** Purification by column chromatography (50% EtOAc in hexanes then 50% EtOAc in hexanes containing 2% TEA) gave **3ae** as a yellow oil (102.7 mg, 81% yield);  $R_f$  = 0.26 (33% EtOAc in hexanes containing 2% TEA);  $^1\text{H}$  NMR (400 MHz,  $\text{CDCl}_3$ ):  $\delta$  7.40–7.15 (m, 10H), 4.10 (q,  $J$  = 7.2 Hz, 2H), 3.88–3.80 (m, 1H), 3.79 (s, 3H), 2.95 (dd,  $J$  = 13.2, 6.4 Hz, 1H), 2.85–2.73 (m, 2H), 2.72 (dd,  $J$  = 12.4, 4.0 Hz, 1H), 2.48 (dd,  $J$  = 13.2, 8.0 Hz, 1H), 2.39 (dd,  $J$  = 12.4, 7.6 Hz, 1H), 2.24 (tt,  $J$  = 11.2, 4.0 Hz, 1H), 2.16–2.04 (m, 2H), 1.90–1.80 (m, 2H), 1.78–1.63 (m, 2H), 1.23 (t,  $J$  = 7.2 Hz, 3H);  $^{13}\text{C}$  NMR (100 MHz,  $\text{CDCl}_3$ ):  $\delta$  175.0, 172.0, 143.8, 141.8, 128.5, 128.2, 127.68, 127.65, 127.0, 126.7, 62.7, 60.6, 60.3, 54.2, 54.1, 53.5, 53.4, 40.8, 38.3, 28.28, 28.22, 14.2; IR (neat): 2929, 1708, 1445, 1260, 1179, 1043, 1026, 760, 698  $\text{cm}^{-1}$ ; HRMS ( $m/z$ ) Calcd for ( $\text{C}_{26}\text{H}_{33}\text{N}_2\text{O}_4$ ) ( $[\text{M}+\text{H}]^+$ ): 437.2435; found: 437.2435.

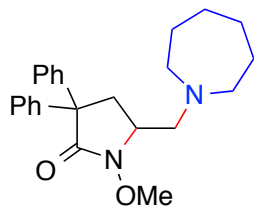

**5-(Azepanomethyl)-1-methoxy-3,3-diphenylpyrrolidin-2-one (3af).** Purification by column chromatography (50% EtOAc in hexanes then 50% EtOAc in hexanes containing 2% TEA) gave **3af** as a yellow oil (49.9 mg, 44% yield);  $R_f$  = 0.30 (33% EtOAc in hexanes containing 2% TEA);  $^1\text{H}$  NMR (400 MHz,  $\text{CDCl}_3$ ):  $\delta$  7.38–7.32 (m, 4H), 7.32–7.25 (m, 4H), 7.25–7.18 (m, 2H), 3.88–3.78 (m, 1H), 3.80 (s, 3H), 3.05–2.95 (m, 2H), 2.73–2.64 (m, 4H), 2.58–2.47 (m, 2H), 1.72–1.48 (m, 8H);  $^{13}\text{C}$  NMR (100 MHz,  $\text{CDCl}_3$ ):  $\delta$  171.9, 143.9, 141.7, 128.4, 128.2, 127.7, 127.6, 127.0, 126.7, 62.6, 59.8, 56.2, 54.2, 54.1, 38.3, 28.0, 27.0; IR (neat): 2925, 2852, 1708, 1445, 1042, 1026, 761, 698  $\text{cm}^{-1}$ ; HRMS ( $m/z$ ) Calcd for ( $\text{C}_{24}\text{H}_{31}\text{N}_2\text{O}_2$ ) ( $[\text{M}+\text{H}]^+$ ): 379.2380; found: 379.2381.

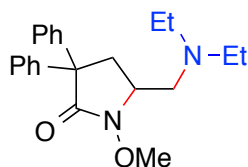

**5-((Diethylamino)methyl)-1-methoxy-3,3-diphenylpyrrolidin-2-one (3ag).** Purification by column chromatography (50% EtOAc in hexanes then 50% EtOAc in hexanes containing 2% TEA) gave **3ag** as a yellow oil (48.9 mg, 47% yield);  $R_f$  = 0.33 (33% EtOAc in hexanes containing 2% TEA);  $^1\text{H}$  NMR (400 MHz,  $\text{CDCl}_3$ ):  $\delta$  7.39–7.17 (m, 10H), 3.84–3.74 (m, 1H), 3.81 (s, 3H), 3.03 (dd,  $J$  = 13.2, 6.4 Hz, 1H), 2.87 (dd,  $J$  = 13.2, 3.6 Hz, 1H), 2.61–2.39 (m, 6H), 0.97 (t,  $J$  = 7.2 Hz, 6H);  $^{13}\text{C}$  NMR (100 MHz,  $\text{CDCl}_3$ ):  $\delta$  171.7, 144.0, 141.5, 128.3, 128.1, 127.6, 127.5, 126.9, 126.5, 62.4, 55.5, 54.12, 54.07, 47.8, 38.5, 11.7; IR

(neat): 2971, 2932, 2811, 1707, 1444, 1025, 696  $\text{cm}^{-1}$ ; HRMS ( $m/z$ ) Calcd for ( $\text{C}_{22}\text{H}_{29}\text{N}_2\text{O}_2$ ) ( $[\text{M}+\text{H}]^+$ ): 353.2224; found: 353.2223.

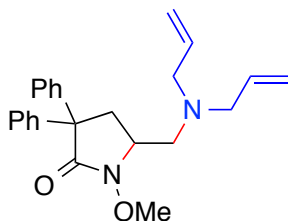

**5-((Diallylamino)methyl)-1-methoxy-3,3-diphenylpyrrolidin-2-one (3ah).** Purification by column chromatography (50% EtOAc in hexanes then 50% EtOAc in hexanes containing 2% TEA) gave **3ah** as a yellow oil (45.4 mg, 40% yield);  $R_f$  = 0.40 (33% EtOAc in hexanes containing 2% TEA);  $^1\text{H}$  NMR (400 MHz,  $\text{CDCl}_3$ ):  $\delta$  7.38–7.18 (m, 10H), 5.85–5.70 (m, 2H), 5.18–5.07 (m, 4H), 3.88–3.80 (m, 1H), 3.78 (s, 3H), 3.16–3.03 (m, 4H), 2.99 (dd,  $J$  = 13.2, 6.4 Hz, 1H), 2.86 (dd,  $J$  = 12.8, 4.0 Hz, 1H), 2.50 (dd,  $J$  = 13.2, 8.4 Hz, 1H), 2.44 (dd,  $J$  = 13.2, 8.0 Hz, 1H);  $^{13}\text{C}$  NMR (100 MHz,  $\text{CDCl}_3$ ):  $\delta$  171.9, 144.0, 141.6, 135.3, 128.4, 128.3, 127.74, 127.67, 127.1, 126.7, 117.8, 62.5, 58.0, 55.6, 54.2, 53.9, 38.4; IR (neat): 2931, 2813, 1710, 1446, 1261, 1042, 1027, 920, 761, 698  $\text{cm}^{-1}$ ; HRMS ( $m/z$ ) Calcd for ( $\text{C}_{24}\text{H}_{29}\text{N}_2\text{O}_2$ ) ( $[\text{M}+\text{H}]^+$ ): 377.2222; found: 377.2222.

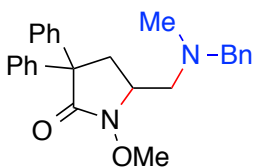

**5-((Benzyl(methyl)amino)methyl)-1-methoxy-3,3-diphenylpyrrolidin-2-one (3ai).** Purification by column chromatography (50% EtOAc in hexanes then 50% EtOAc in hexanes containing 2% TEA) gave **3ai** as a colorless oil (64.2 mg, 54% yield);  $R_f$  = 0.33 (33% EtOAc in hexanes containing 2% TEA);  $^1\text{H}$  NMR (400 MHz,  $\text{CDCl}_3$ ):  $\delta$  7.36–7.20 (m, 15H), 3.90–3.82 (m, 1H), 3.81 (s, 3H), 3.57 (d,  $J$  = 12.8 Hz, 1H), 3.51 (d,  $J$  = 12.8 Hz, 1H), 2.99 (dd,  $J$  = 13.2, 6.4 Hz, 1H), 2.87 (dd,  $J$  = 12.4, 4.0 Hz, 1H), 2.52 (dd,  $J$  = 12.4, 8.4 Hz, 1H), 2.48 (dd,  $J$  = 13.2, 8.0 Hz, 1H), 2.27 (s, 3H);  $^{13}\text{C}$  NMR (100 MHz,  $\text{CDCl}_3$ ):  $\delta$  172.0, 143.8, 141.8, 138.7, 128.9, 128.5, 128.3, 128.2, 127.7, 127.6, 127.2, 127.0, 126.7, 63.2, 62.7, 59.7, 54.2, 53.7, 43.5, 38.3; IR (neat): 2921, 2848, 1705, 1448, 1024, 698  $\text{cm}^{-1}$ ; HRMS ( $m/z$ ) Calcd for ( $\text{C}_{26}\text{H}_{29}\text{N}_2\text{O}_2$ ) ( $[\text{M}+\text{H}]^+$ ): 401.2224; found: 401.2222.

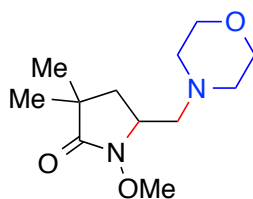

**1-Methoxy-3,3-dimethyl-5-(morpholinomethyl)pyrrolidin-2-one (3fa).** Purification by column chromatography (50% EtOAc in hexanes then 50% EtOAc in hexanes containing 2% TEA) gave **3fa** as a yellow oil (65.1 mg, 90% yield);  $R_f$  = 0.29 (50% EtOAc in hexanes containing 2% TEA);  $^1\text{H}$  NMR (400 MHz,  $\text{CDCl}_3$ ):  $\delta$  3.80–3.70 (m, 1H), 3.74 (s, 3H), 3.66–3.61 (m, 4H), 2.66 (dd,  $J$  = 12.8, 4.4 Hz, 1H), 2.50–2.42 (m, 4H), 2.37 (dd,  $J$  = 12.8, 7.2 Hz, 1H), 1.98 (dd,  $J$  = 12.8, 7.2 Hz, 1H), 1.62 (dd,  $J$  = 12.8, 7.6 Hz, 1H), 1.16 (s, 3H), 1.07 (s, 3H);  $^{13}\text{C}$  NMR (100 MHz,  $\text{CDCl}_3$ ):  $\delta$  176.2, 66.8, 62.4, 61.4, 54.4, 52.7, 37.8, 37.3, 25.7, 25.1; IR (neat): 2962, 2848, 2808, 1699, 1454, 1252, 1110, 1009, 859  $\text{cm}^{-1}$ ; HRMS ( $m/z$ ) Calcd for ( $\text{C}_{12}\text{H}_{23}\text{N}_2\text{O}_3$ ) ( $[\text{M}+\text{H}]^+$ ): 243.1704; found: 243.1704.

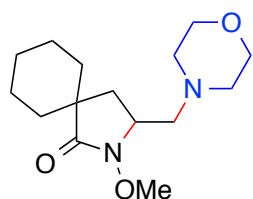



**2-Methoxy-3-(morpholinomethyl)-2-azaspiro[4.5]decan-1-one (3ga).** Purification by column chromatography (50% EtOAc in hexanes then 50% EtOAc in hexanes containing 2% TEA) gave **3ga** as a yellow oil (69 mg, 81% yield);  $R_f$  = 0.28 (50% EtOAc in hexanes containing 2% TEA);  $^1\text{H}$  NMR (400 MHz,  $\text{CDCl}_3$ ):  $\delta$  3.75–3.68 (m, 1H), 3.72 (s, 3H), 3.63 (t,  $J$  = 4.8 Hz, 4H), 2.65 (dd,  $J$  = 12.8, 4.0 Hz, 1H), 2.45 (t,  $J$  = 4.8 Hz, 4H), 2.35 (dd,  $J$  = 12.8, 7.2 Hz, 1H), 2.11 (dd,  $J$  = 13.2, 7.6 Hz, 1H), 1.75–1.45 (m, 6H), 1.40–1.16 (m, 5H);  $^{13}\text{C}$  NMR (100 MHz,  $\text{CDCl}_3$ ):  $\delta$  176.0, 66.8, 62.5, 61.6, 54.4, 53.0, 41.4, 34.2, 33.5, 32.0, 25.1, 21.54, 21.50; IR (neat): 2924, 2851, 2798, 2755, 1701, 1442, 1364, 1275, 1114, 866  $\text{cm}^{-1}$ ; HRMS ( $m/z$ ) Calcd for ( $\text{C}_{15}\text{H}_{27}\text{N}_2\text{O}_3$ ) ( $[\text{M}+\text{H}]^+$ ): 283.2016; found: 283.2014.

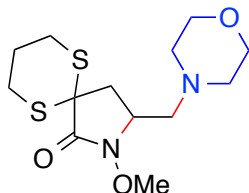

**2-Methoxy-3-(morpholinomethyl)-6,10-dithia-2-azaspiro[4.5]decan-1-one (3ha).** Purification by column chromatography (50% EtOAc in hexanes then 50% EtOAc in hexanes containing 2% TEA) gave **3ha** as a yellow oil (48.6 mg, 51% yield);  $R_f$  = 0.29 (50% EtOAc in hexanes containing 2% TEA);  $^1\text{H}$  NMR (400 MHz,  $\text{CDCl}_3$ ):  $\delta$  3.72 (t,  $J$  = 13.2 Hz, 1H), 3.65–3.55 (m, 1H), 3.53 (s, 3H), 3.44 (t,  $J$  = 13.2 Hz, 1H), 3.39 (t,  $J$  = 4.8 Hz, 4H), 2.46 (dd,  $J$  = 12.8, 4.4 Hz, 1H), 2.32–2.24 (m, 1H), 2.28 (dd,  $J$  = 14.0, 3.6 Hz, 1H), 2.19 (t,  $J$  = 4.8 Hz, 4H), 2.22–2.14 (m, 1H), 1.95 (dd,  $J$  = 14.0, 6.8 Hz, 1H), 1.97–1.88 (m, 1H), 1.71 (dd,  $J$  = 14.0, 7.2 Hz, 1H), 1.67–1.52 (m, 1H);  $^{13}\text{C}$  NMR (100 MHz,  $\text{CDCl}_3$ ):  $\delta$  169.8, 66.8, 62.4, 60.5, 54.3, 52.5, 43.1, 37.7, 27.4, 27.0, 24.3; IR (neat): 2922, 2851, 2813, 1706, 1423, 1278, 1116, 865  $\text{cm}^{-1}$ ; HRMS ( $m/z$ ) Calcd for ( $\text{C}_{13}\text{H}_{23}\text{N}_2\text{O}_3\text{S}_2$ ) ( $[\text{M}+\text{H}]^+$ ): 319.1145; found: 319.1145.

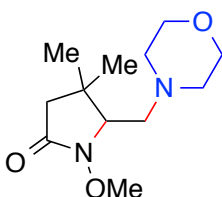

**1-Methoxy-4,4-dimethyl-5-(morpholinomethyl)pyrrolidin-2-one (3ia).** Purification by column chromatography (50% EtOAc in hexanes then 50% EtOAc in hexanes containing 2% TEA) gave **3ia** as a yellow oil (26.2 mg, 36% yield);  $R_f$  = 0.26 (50% EtOAc in hexanes containing 2% TEA);  $^1\text{H}$  NMR (400 MHz,  $\text{CDCl}_3$ ):  $\delta$  3.77 (s, 3H), 3.65 (t,  $J$  = 4.4 Hz, 4H), 3.43 (t,  $J$  = 5.6 Hz, 1H), 2.55 (d,  $J$  = 5.6 Hz, 2H), 2.52–2.41 (m, 4H), 2.27 (d,  $J$  = 16.4 Hz, 1H), 2.05 (d,  $J$  = 16.4 Hz, 1H), 1.20 (s, 3H), 1.10 (s, 3H);  $^{13}\text{C}$  NMR (125 MHz,  $\text{CDCl}_3$ ):  $\delta$  163.4, 60.0, 56.7, 55.4, 49.2, 47.3, 36.5, 26.8, 22.0, 16.0; IR (neat): 2957, 2851, 1702, 1453, 1292, 1114, 1061, 865  $\text{cm}^{-1}$ ; HRMS ( $m/z$ ) Calcd for ( $\text{C}_{12}\text{H}_{23}\text{N}_2\text{O}_3$ ) ( $[\text{M}+\text{H}]^+$ ): 243.1703; found: 243.1703.

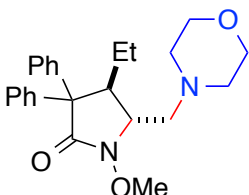

**(trans)-4-Ethyl-1-methoxy-5-(morpholinomethyl)-3,3-diphenylpyrrolidin-2-one (3ja).** Purification by column chromatography (50% EtOAc in hexanes then 50% EtOAc in hexanes containing 2% TEA) gave **3ja** as a yellow oil (66.3 mg, 56% yield,  $dr > 20:1$ );  $R_f$  = 0.28 (33% EtOAc in hexanes containing 2% TEA);  $^1\text{H}$  NMR (400 MHz,  $\text{CDCl}_3$ ):  $\delta$  7.64 (d,  $J$  = 7.6 Hz, 2H), 7.34 (t,  $J$  = 7.6 Hz, 2H), 7.28 (d,  $J$  = 7.6 Hz, 1H), 7.25–7.15 (m, 3H), 6.94 (d,  $J$  = 7.6 Hz, 2H), 3.93 (s, 3H), 3.69–3.53 (m, 5H), 3.10 (dt,  $J$  = 8.8, 5.6 Hz, 1H), 2.57 (dd,  $J$  = 4.8, 2.0 Hz, 2H), 2.53–2.38 (m, 4H), 1.20–1.00 (m, 2H), 0.88 (t,  $J$  = 7.6 Hz, 3H);  $^{13}\text{C}$  NMR (100 MHz,  $\text{CDCl}_3$ ):  $\delta$  172.1, 141.7, 141.5, 128.9, 128.4, 128.0, 127.9, 127.1, 126.7, 66.9, 62.6, 59.4, 58.7, 58.1, 54.3, 43.7, 24.2, 12.7; IR (neat): 2960, 2933, 2850, 2809, 1707, 1494, 1444, 1116, 700  $\text{cm}^{-1}$ ; HRMS ( $m/z$ ) Calcd for ( $\text{C}_{24}\text{H}_{31}\text{N}_2\text{O}_3$ ) ( $[\text{M}+\text{H}]^+$ ): 395.2329; found: 395.2328.



The relative stereochemistry of **3ja** was determined by NOESY.

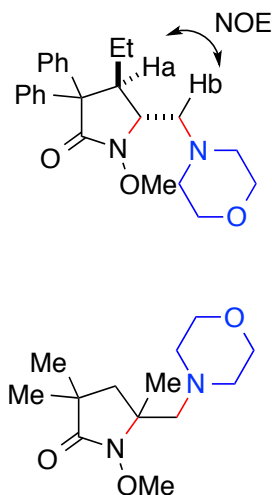

**1-Methoxy-3,3,5-trimethyl-5-(morpholinomethyl)pyrrolidin-2-one (3ka).** Purification by column chromatography (50% EtOAc in hexanes then 50% EtOAc in hexanes containing 2% TEA) gave **3ka** as a yellow oil (48.4 mg, 62% yield);  $R_f$  = 0.35 (50% EtOAc in hexanes containing 2% TEA);  $^1\text{H}$  NMR (400 MHz,  $\text{CDCl}_3$ ):  $\delta$  3.80 (s, 3H), 3.65–3.50 (m, 4H), 2.65–2.54 (m, 2H), 2.52 (d,  $J$  = 13.6 Hz, 1H), 2.41–2.29 (m, 2H), 2.03 (d,  $J$  = 6.0 Hz, 1H), 2.00 (d,  $J$  = 6.0 Hz, 1H), 1.56 (d,  $J$  = 13.6 Hz, 1H), 1.27 (s, 3H), 1.23 (s, 3H), 1.18 (s, 3H);  $^{13}\text{C}$  NMR (100 MHz,  $\text{CDCl}_3$ ):  $\delta$  174.9, 67.0, 63.8 (2C), 61.1, 55.2, 43.0, 36.4, 29.4, 26.0, 25.0; IR (neat): 2964, 2853, 2805, 1697, 1454, 1381, 1356, 1315, 1115, 1009, 864  $\text{cm}^{-1}$ ; HRMS ( $m/z$ ) Calcd for  $(\text{C}_{13}\text{H}_{25}\text{N}_2\text{O}_3)$  ( $[\text{M}+\text{H}]^+$ ): 257.1860; found: 257.1860.

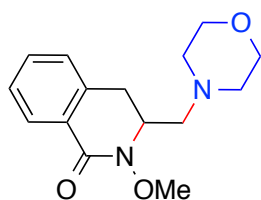

**2-Methoxy-3-(morpholinomethyl)-3,4-dihydroisoquinolin-1(2H)-one (3la).** Purification by column chromatography (50% EtOAc in hexanes then 50% EtOAc in hexanes containing 2% TEA) gave **3la** as a yellow oil (53 mg, 65% yield);  $R_f$  = 0.23 (50% EtOAc in hexanes containing 2% TEA);  $^1\text{H}$  NMR (400 MHz,  $\text{CDCl}_3$ ):  $\delta$  8.04 (d,  $J$  = 7.6 Hz, 1H), 7.38 (t,  $J$  = 7.6 Hz, 1H), 7.28 (t,  $J$  = 7.6 Hz, 1H), 7.13 (d,  $J$  = 7.6 Hz, 1H), 4.00–3.92 (m, 1H), 3.85 (s, 3H), 3.61–3.51 (m, 2H), 3.51–3.42 (m, 2H), 3.36 (dd,  $J$  = 16.0, 6.0 Hz, 1H), 3.16 (dd,  $J$  = 16.0, 2.4 Hz, 1H), 2.55 (dd,  $J$  = 13.2, 3.6 Hz, 1H), 2.47–2.35 (m, 3H), 2.35–2.25 (m, 2H);  $^{13}\text{C}$  NMR (100 MHz,  $\text{CDCl}_3$ ):  $\delta$  162.9, 135.5, 132.1, 128.6, 127.68, 127.66, 126.9, 66.8, 62.6, 57.9, 56.6, 54.1, 32.2; IR (neat): 2933, 2852, 2808, 1663, 1458, 1266, 1114, 1004, 866, 730, 689  $\text{cm}^{-1}$ ; HRMS ( $m/z$ ) Calcd for  $(\text{C}_{15}\text{H}_{21}\text{N}_2\text{O}_3)$  ( $[\text{M}+\text{H}]^+$ ): 277.1547; found: 277.1547.

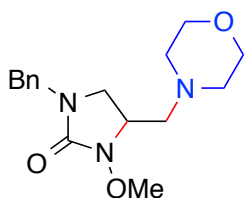

**1-Benzyl-3-methoxy-4-(morpholinomethyl)imidazolidin-2-one (3ma).** Purification by column chromatography (50% EtOAc in hexanes then 50% EtOAc in hexanes containing 2% TEA) gave **3ma** as a yellow oil (36.8 mg, 41% yield);  $R_f$  = 0.24 (50% EtOAc in hexanes containing 2% TEA);  $^1\text{H}$  NMR (400 MHz,  $\text{CDCl}_3$ ):  $\delta$  7.35–7.15 (m, 5H), 4.40 (d,  $J$  = 14.8 Hz, 1H), 4.25 (d,  $J$  = 14.8 Hz, 1H), 3.82 (s, 3H), 3.70–3.52 (m, 1H), 3.60 (t,  $J$  = 4.0 Hz, 4H), 3.22 (t,  $J$  = 8.4 Hz, 1H), 2.86 (t,  $J$  = 9.2 Hz, 1H), 2.70 (dd,  $J$  = 12.4, 4.8 Hz, 1H), 2.44 (dd,  $J$  = 12.4, 8.0 Hz, 1H), 2.46–2.32 (m, 4H);  $^{13}\text{C}$  NMR (100 MHz,  $\text{CDCl}_3$ ):  $\delta$  162.5, 135.8, 128.6, 128.1, 127.6, 66.7, 64.4, 60.5, 56.6, 54.1, 47.7, 45.5; IR (neat): 2934, 2852, 2811, 1723, 1436, 1239, 1114, 1034, 699  $\text{cm}^{-1}$ ; HRMS ( $m/z$ ) Calcd for  $(\text{C}_{16}\text{H}_{24}\text{N}_3\text{O}_3)$  ( $[\text{M}+\text{H}]^+$ ): 306.1812; found: 306.1812.

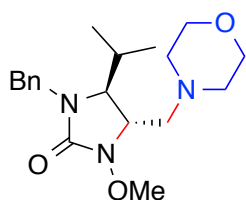

**(4*S*,5*S*)-1-Benzyl-5-isopropyl-3-methoxy-4-(morpholinomethyl)imidazolidin-2-one (3na).** Purification by column chromatography (50% EtOAc in hexanes then 50% EtOAc in hexanes containing 2% TEA) gave **3na** as a yellow oil (47 mg, 46% yield);  $[\alpha]_D^{20} = -18.3$  ( $c = 0.6$ ,  $\text{CHCl}_3$ );  $R_f = 0.31$  (33% EtOAc in hexanes containing 2% TEA);  $^1\text{H}$  NMR (400 MHz,  $\text{CDCl}_3$ ):  $\delta$  7.35–7.18 (m, 5H), 4.90 (d,  $J = 14.8$  Hz, 1H), 3.86 (d,  $J = 14.8$  Hz, 1H), 3.85 (s, 3H), 3.56 (t,  $J = 4.4$  Hz, 4H), 3.41 (q,  $J = 5.6$  Hz, 1H), 3.13 (dd,  $J = 5.6$ , 3.6 Hz, 1H), 2.47 (dd,  $J = 13.2$ , 5.6 Hz, 1H), 2.44–2.29 (m, 4H), 2.25 (dd,  $J = 13.2$ , 5.6 Hz, 1H), 2.06–1.94 (m, 1H), 0.83 (d,  $J = 3.6$  Hz, 3H), 0.81 (d,  $J = 3.6$  Hz, 3H);  $^{13}\text{C}$  NMR (125 MHz,  $\text{CDCl}_3$ ):  $\delta$  161.7, 136.3, 128.6, 128.1, 127.6, 66.8, 64.0, 60.2, 59.1, 55.5, 54.2, 45.1, 27.4, 18.1, 15.8; IR (neat): 2958, 2852, 2808, 1717, 1424, 1115, 700  $\text{cm}^{-1}$ ; HRMS ( $m/z$ ) Calcd for ( $\text{C}_{19}\text{H}_{30}\text{N}_3\text{O}_3$ ) ( $[\text{M}+\text{H}]^+$ ): 348.2282; found: 348.2283.

The relative stereochemistry of **3pa** was determined by NOESY.

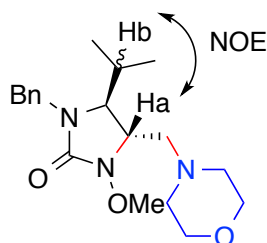

## VI. Mechanism Investigation.

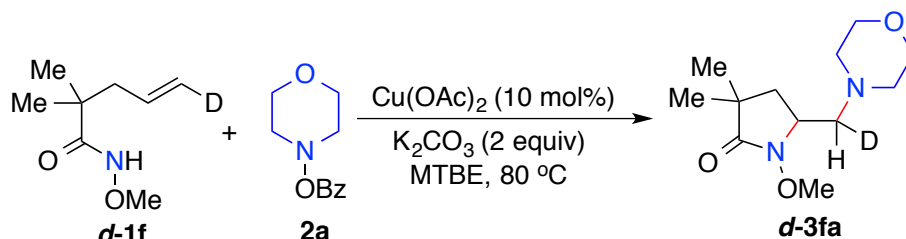

To a reaction tube charged with (*E*)-*N*-methoxy-2,2-dimethylpent-4-en-5-*d*-amide **d-1f** (31.6 mg, 0.2 mmol) and hydroxylamine **2a** (49.7 mg, 0.24 mmol), was added  $\text{Cu}(\text{OAc})_2$  (3.6 mg, 0.02 mmol),  $\text{K}_2\text{CO}_3$  (55.2 mg, 0.4 mmol), and MTBE (1 mL). The reaction tube was capped and the resulting mixture was stirred at 80 °C for 2 h. After cooling down to room temperature, the reaction mixture was diluted with EtOAc (5 mL) and washed with a saturated aqueous solution of  $\text{Na}_2\text{CO}_3$  (5 mL). The aqueous layer was separated and extracted with EtOAc (10 mL  $\times$  2). The combined organic layers were dried over  $\text{Na}_2\text{SO}_4$ , and filtered. The filtrate was concentrated *in vacuo*. Purification by column chromatography (50% EtOAc in hexanes then 50% EtOAc in hexanes containing 2% TEA) gave 1-methoxy-3,3-dimethyl-5-(morpholinomethyl-*d*)pyrrolidin-2-one **d-3fa** as a yellow oil (32.1 mg, 66% yield, inseparable diastereoisomer,  $dr = 1:1$ );  $R_f = 0.29$  (50% EtOAc in hexanes containing 2% TEA);  $^1\text{H}$  NMR (400 MHz,  $\text{CDCl}_3$ ):  $\delta$  3.79–3.72 (m, 1H), 3.75 (s, 3H), 3.68–3.62 (m, 4H), 2.67 (d,  $J = 4.4$  Hz, 0.5H), 2.53–2.40 (m, 4H), 2.36 (d,  $J = 6.8$  Hz, 0.5H), 1.99 (dd,  $J = 12.8$ , 7.6 Hz, 1H), 1.62 (dd,  $J = 12.8$ , 7.6 Hz, 1H), 1.17 (s, 3H), 1.08 (s, 3H);  $^{13}\text{C}$  NMR (100 MHz,  $\text{CDCl}_3$ ):  $\delta$  176.2, 66.9, 62.5, 61.0 (t,  $J = 20$  Hz), 54.4, 52.7, 37.8, 37.3, 25.7, 25.1; IR (neat): 2962, 2848, 2809, 1699, 1453, 1270, 1112, 1013, 859  $\text{cm}^{-1}$ ; HRMS ( $m/z$ ) Calcd for ( $\text{C}_{12}\text{H}_{22}\text{DN}_2\text{O}_3$ ) ( $[\text{M}+\text{H}]^+$ ): 244.1766; found: 244.1765.

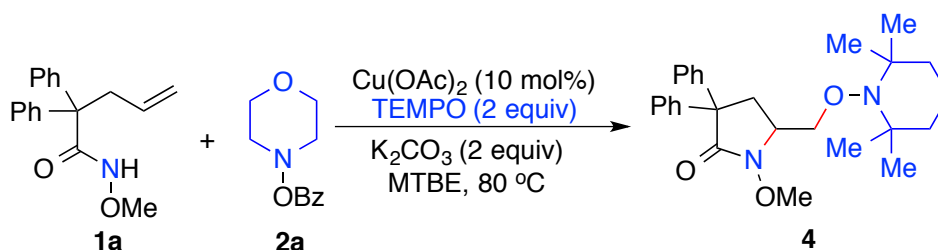

To a reaction tube charged with *N*-methoxy-2,2-diphenylpent-4-enamide (56.2 mg, 0.2 mmol) and hydroxylamine (49.7 mg, 0.24 mmol), was added Cu(OAc)<sub>2</sub> (3.6 mg, 0.02 mmol), K<sub>2</sub>CO<sub>3</sub> (55.2 mg, 0.4 mmol), TEMPO (55.2 mg, 0.4 mmol) and MTBE (1 mL). The reaction tube was capped and the resulting mixture was stirred at 80 °C for 24 h. After cooling down to room temperature, the reaction mixture was diluted with EtOAc (5 mL), washed with a saturated aqueous solution of Na<sub>2</sub>S<sub>2</sub>O<sub>3</sub> (5 mL) and a saturated aqueous solution of Na<sub>2</sub>CO<sub>3</sub> (5 mL). The aqueous layers were extracted with EtOAc (10 mL × 2). The combined organic layers were dried over Na<sub>2</sub>SO<sub>4</sub>, and filtered. The filtrate was concentrated *in vacuo*. Purification by column chromatography (5% EtOAc in hexanes) gave 1-methoxy-3,3-diphenyl-5-(((2,2,6,6-tetramethylpiperidin-1-yl)oxy)-methyl)pyrrolidin-2-one **4** as a colorless oil (31.4 mg, 36% yield); *R*<sub>f</sub> = 0.25 (12.5% EtOAc in hexanes); <sup>1</sup>H NMR (400 MHz, CDCl<sub>3</sub>): δ 7.42–7.20 (m, 10H), 4.04–3.93 (m, 2H), 3.93–3.82 (m, 1H), 3.85 (s, 3H), 2.93 (dd, *J* = 12.8, 6.4 Hz, 1H), 2.64 (dd, *J* = 13.2, 8.8 Hz, 1H), 1.52–1.40 (m, 4H), 1.37–1.27 (m, 2H), 1.17 (s, 3H), 1.16 (s, 3H), 1.11 (s, 3H), 1.08 (s, 3H); <sup>13</sup>C NMR (100 MHz, CDCl<sub>3</sub>): δ 171.7, 143.8, 141.4, 128.5, 128.3, 127.8, 127.7, 127.2, 126.8, 76.0, 62.4, 60.0, 54.3, 53.6, 39.7, 36.3, 20.1, 16.9; IR (neat): 2971, 2928, 1712, 1446, 1373, 1359, 1045, 697 cm<sup>-1</sup>; HRMS (*m/z*) Calcd for (C<sub>27</sub>H<sub>37</sub>N<sub>2</sub>O<sub>3</sub>) ([M+H]<sup>+</sup>): 437.2799; found: 437.2797.

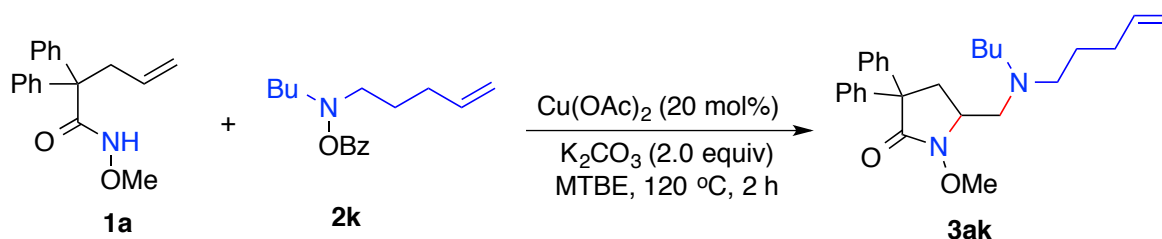

Follow the diamination reaction procedure. The reaction was runned in a 0.2 mmol scale. Purification by column chromatography (20% EtOAc in hexanes) gave 5-((butyl(pent-4'-en-1'-yl)amino)methyl)-1-methoxy-3,3-diphenylpyrrolidin-2-one **3ak** as a colorless oil (37.8 mg, 45% yield); *R*<sub>f</sub> = 0.50 (33% EtOAc in hexanes containing 2% TEA); <sup>1</sup>H NMR (400 MHz, CDCl<sub>3</sub>): δ 7.42–7.19 (m, 10H), 5.85–5.71 (m, 1H), 5.04–4.91 (m, 2H), 3.87–3.78 (m, 1H), 3.82 (s, 3H), 3.06 (dd, *J* = 13.2, 6.4 Hz, 1H), 2.88 (dd, *J* = 13.2, 3.6 Hz, 1H), 2.60–2.34 (m, 6H), 2.10–1.98 (m, 2H), 1.58–1.42 (m, 2H), 1.42–1.20 (m, 4H), 0.89 (t, *J* = 7.2 Hz, 3H); <sup>13</sup>C NMR (125 MHz, CDCl<sub>3</sub>): δ 172.0, 144.1, 141.5, 138.4, 128.5, 128.3, 127.7, 127.6, 127.1, 126.8, 114.7, 62.7, 57.0, 54.7, 54.3, 54.2 (2C), 38.7, 31.3, 29.3, 26.3, 20.4, 14.0; IR (neat): 2931, 2861, 2814, 1709, 1446, 1377, 1195, 1041, 1027, 697 cm<sup>-1</sup>; HRMS (*m/z*) Calcd for (C<sub>27</sub>H<sub>37</sub>N<sub>2</sub>O<sub>3</sub>) ([M+H]<sup>+</sup>): 421.2850; found: 421.2847.

## VII. Deprotection Conditions for 3aa.

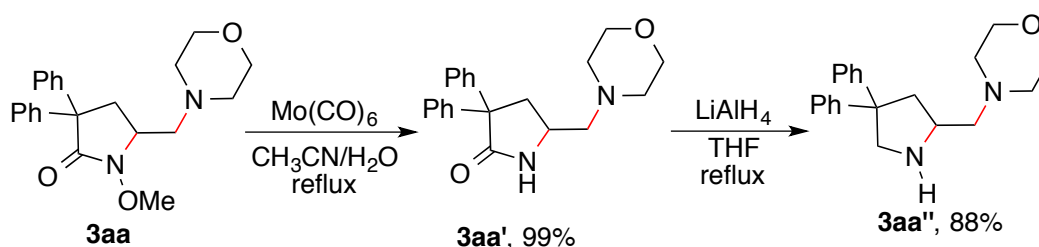

To a solution of **3aa** (73.2 mg, 0.2 mmol) in CH<sub>3</sub>CN–H<sub>2</sub>O (3.2 mL, 15:1) at room temperature was added Mo(CO)<sub>6</sub><sup>4</sup> (63.4 mg, 0.24 mmol). The resulting mixture was heated and refluxed for 2 h. The solvent was removed under reduced pressure. Purification by column chromatography (50% EtOAc in hexanes containing 2% TEA) gave 5-(morpholinomethyl)-3,3-diphenylpyrrolidin-2-one **3aa'** as a white solid (66.8 mg, 99% yield); *R*<sub>f</sub> = 0.14 (50% EtOAc in hexanes containing 2% TEA); <sup>1</sup>H NMR (400 MHz, CDCl<sub>3</sub>): δ 7.42 (d, *J* = 7.6 Hz, 2H), 7.38–7.17 (m, 8H), 6.90 (s, br, 1H), 3.80–3.70 (m, 1H), 3.70–3.57 (m, 4H), 2.94 (dd, *J* = 13.2, 6.0 Hz, 1H), 2.58–2.48 (m, 2H), 2.46 (dd, *J* = 12.8, 4.0 Hz, 1H), 2.42–2.30 (m, 4H); <sup>13</sup>C NMR (100 MHz, CDCl<sub>3</sub>): δ 177.1, 143.9, 141.6, 128.4, 128.0, 127.9, 127.6, 127.0, 126.5, 66.8, 64.0, 57.7, 53.8, 47.6, 41.7; IR (neat): 2921, 2864, 2802, 1696, 1558, 1443, 1301, 1109, 909, 725, 696 cm<sup>-1</sup>; HRMS (*m/z*) Calcd for (C<sub>21</sub>H<sub>25</sub>N<sub>2</sub>O<sub>2</sub>) ([M+H]<sup>+</sup>): 337.1911; found: 337.1912.

To a 25 mL round-bottomed flask was added LiAlH<sub>4</sub> (38 mg, 1 mmol) followed by THF (5 mL) and the solution of **3aa'** (66.8 mg, 0.2 mmol) in THF (5 mL) at room temperature. The resulting mixture was heated

and refluxed overnight. The reaction was quenched with the addition of an aqueous solution of NaOH (0.2 M, 5 mL). The mixture was filtered through a pale of Celite. The solvent was removed under reduced pressure. Purification by column chromatography (5% MeOH in CH<sub>2</sub>Cl<sub>2</sub>) gave 5-(morpholinomethyl)-3,3-diphenylpyrrolidine **3aa''** as a colorless oil (56.8 mg, 88% yield); *R*<sub>f</sub> = 0.13 (5% MeOH in CH<sub>2</sub>Cl<sub>2</sub>); <sup>1</sup>H NMR (400 MHz, CDCl<sub>3</sub>): δ 7.35–7.19 (m, 8H), 7.19–7.11 (m, 2H), 3.76–3.60 (m, 5H), 3.55–3.45 (m, 1H), 3.45 (d, *J* = 11.2 Hz, 1H), 2.80–2.70 (m, 2H), 2.54–2.28 (m, 6H), 2.05 (dd, *J* = 12.8, 8.8 Hz, 1H); <sup>13</sup>C NMR (100 MHz, CDCl<sub>3</sub>): δ 147.2, 146.5, 128.4 (2C), 128.3 (2C), 127.0 (2C), 126.8 (2C), 126.1 (2C), 66.9, 65.0, 57.0, 56.1, 54.2, 54.0, 43.4; IR (neat): 2958, 2855, 2807, 1734, 1445, 1372, 1240, 1115, 909, 726, 698 cm<sup>-1</sup>; HRMS (*m/z*) Calcd for (C<sub>21</sub>H<sub>27</sub>N<sub>2</sub>O) ([M+H]<sup>+</sup>): 323.2123; found: 323.2125.

### VIII. Synthesis of (±)-FAUC-179

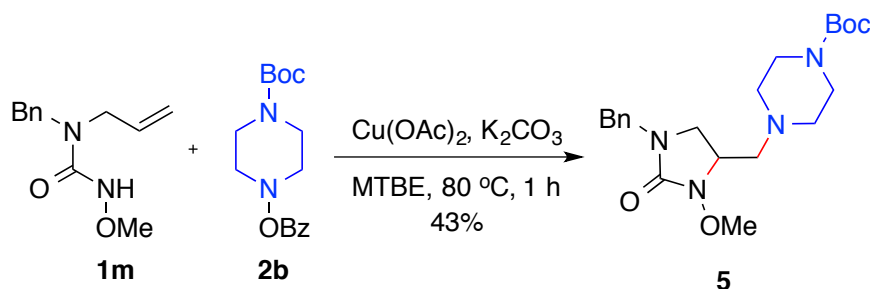

Follow the diamination procedure. Purification by column chromatography (50% EtOAc in hexanes then 50% EtOAc in hexanes containing 2% TEA) gave *tert*-butyl 4-((1'-benzyl-3'-methoxy-2'-oxoimidazolidin-4'-yl)methyl)piperazine-1-carboxylate **5** as a yellow oil (51.6 mg, 43% yield); *R*<sub>f</sub> = 0.45 (5% MeOH in CH<sub>2</sub>Cl<sub>2</sub>); <sup>1</sup>H NMR (400 MHz, CDCl<sub>3</sub>): δ 7.34–7.18 (m, 5H), 4.40 (d, *J* = 14.8 Hz, 1H), 4.27 (d, *J* = 14.8 Hz, 1H), 3.82 (s, 3H), 3.65–3.55 (m, 1H), 3.40–3.25 (m, 4H), 3.22 (t, *J* = 8.4 Hz, 1H), 2.86 (t, *J* = 9.2 Hz, 1H), 2.71 (dd, *J* = 13.2, 4.8 Hz, 1H), 2.46 (dd, *J* = 13.2, 8.4 Hz, 1H), 2.40–2.25 (m, 4H), 1.41 (s, 9H); <sup>13</sup>C NMR (100 MHz, CDCl<sub>3</sub>): δ 162.5, 154.6, 135.9, 128.7, 128.1, 127.7, 79.6, 64.5, 60.1, 56.8, 53.5, 47.7, 45.5, 28.3; IR (neat): 2973, 2932, 2812, 1732, 1689, 1419, 1246, 1169, 1124, 1036, 1005, 701 cm<sup>-1</sup>; HRMS (*m/z*) Calcd for (C<sub>21</sub>H<sub>33</sub>N<sub>4</sub>O<sub>4</sub>) ([M+H]<sup>+</sup>): 405.2496; found: 405.2496.

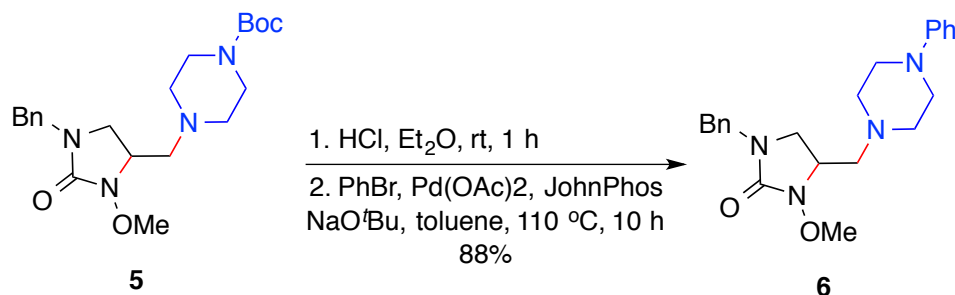

To a round-bottomed flask was charged with **5** (80.8 mg, 0.2 mmol) followed by the addition of HCl (2 M in Et<sub>2</sub>O, 10 mL). The resulting mixture was stirred at room temperature for 1 h and then was added an aqueous solution of NaOH (2 M, 10 mL). The organic layer was separated and the aqueous layer was extracted with EtOAc. The combined organic solvent was dried over Na<sub>2</sub>SO<sub>4</sub> and filtered off. The solvent was removed under reduced pressure and the residue was used for the next step. To the crude mixture, were added PhBr (47.1 mg, 0.3 mmol), NaO<sup>t</sup>Bu (28.8 mg, 0.3 mmol), Pd(OAc)<sub>2</sub> (0.9 mg, 0.004 mmol), JohnPhos (2.4 mg, 0.008 mmol) and toluene (2 mL). The resulting mixture was stirred at 110 °C for 10 h under nitrogen atmosphere. Then the reaction mixture was cooled down to room temperature and filtered through a pale of Celite. The filtrate was concentrated under reduced pressure. Purification by column chromatography (50% EtOAc in hexanes then 100% EtOAc) gave 1-benzyl-3-methoxy-4-((4'-phenylpiperazin-1'-yl)methyl)imidazolidin-2-one **6** as a yellow oil (66.7 mg, 88% yield); *R*<sub>f</sub> = 0.43 (5% MeOH in CH<sub>2</sub>Cl<sub>2</sub>); <sup>1</sup>H NMR (400 MHz, CDCl<sub>3</sub>): δ 7.36–7.21 (m, 7H), 6.89 (d, *J* = 8.8 Hz, 2H), 6.84 (t, *J* = 7.6 Hz, 1H), 4.44 (d, *J* = 14.8 Hz, 1H), 4.30 (d, *J* = 14.8 Hz, 1H), 3.86 (s, 3H), 3.72–3.65 (m, 1H), 3.28 (t, *J* = 8.6 Hz, 1H), 3.19–3.06 (m, 4H), 2.91 (t, *J* = 9.2 Hz, 1H), 2.79 (dd, *J* = 12.4, 4.8 Hz, 1H), 2.67–2.49 (m, 5H); <sup>13</sup>C NMR (100 MHz, CDCl<sub>3</sub>): δ 162.6, 151.1, 136.0, 129.1, 128.7, 128.2, 127.7, 116.0, 64.5, 60.2, 57.0, 53.8, 49.0, 47.8, 45.7; IR (neat): 2936, 2819, 1732, 1599, 1496, 1437, 1233, 1035, 759, 699 cm<sup>-1</sup>; HRMS (*m/z*) Calcd for (C<sub>22</sub>H<sub>29</sub>N<sub>4</sub>O<sub>2</sub>) ([M+H]<sup>+</sup>): 381.2285; found: 381.2287.

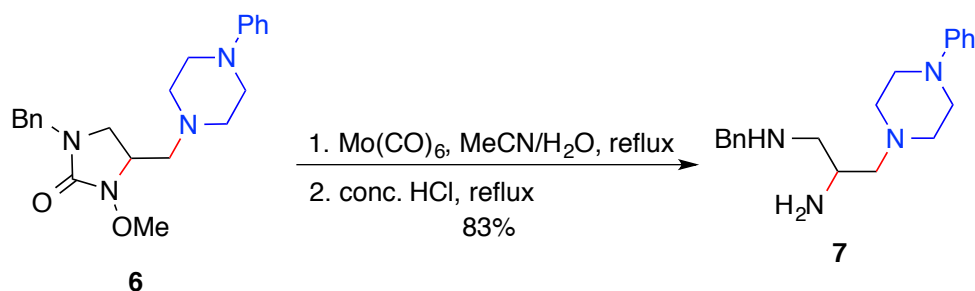

To a solution of **6** (38 mg, 0.1 mmol) in CH<sub>3</sub>CN-H<sub>2</sub>O (2.2 mL, 10:1) at room temperature was added Mo(CO)<sub>6</sub> (31.7 mg, 0.12 mmol). The resulting mixture was heated and refluxed for 2 h. The reaction mixture was cooled down to room temperature and concentrated under reduced pressure. To the resulting crude mixture, was added an aqueous solution of HCl (37% in H<sub>2</sub>O, 5 mL) was added. The resulting mixture was heated and refluxed for 2 days. The mixture was basified to pH = 12 with the addition of NaOH and then was extracted with EtOAc for three times. The combined organic solvent was removed under reduced pressure. Purification by column chromatography (10% MeOH in CH<sub>2</sub>Cl<sub>2</sub> containing 2% ammonia in H<sub>2</sub>O) gave *N*<sup>1</sup>-benzyl-3-(4'-phenylpiperazin-1'-yl)propane-1,2-diamine **7** as a colorless oil (27 mg, 83% yield); *R*<sub>f</sub> = 0.38 (10% MeOH in CH<sub>2</sub>Cl<sub>2</sub> containing 1% ammonia in H<sub>2</sub>O); <sup>1</sup>H NMR (400 MHz, CDCl<sub>3</sub>): δ 7.30 (d, *J* = 4.4 Hz, 4H), 7.28–7.20 (m, 3H), 6.91 (d, *J* = 7.6 Hz, 2H), 6.83 (t, *J* = 7.6 Hz, 1H), 3.79 (s, 2H), 3.25–3.05 (m, 5H), 2.72–2.60 (m, 3H), 2.56–2.42 (m, 3H), 2.34–2.24 (m, 2H); <sup>13</sup>C NMR (125 MHz, CDCl<sub>3</sub>): δ 151.3, 140.5, 129.1, 128.4, 128.1, 126.9, 119.6, 116.0, 63.8, 54.6, 54.3, 53.6, 49.2, 47.9; IR (neat): 3286, 3058, 2924, 2818, 1599, 1495, 1453, 1233, 757, 696 cm<sup>-1</sup>; HRMS (*m/z*) Calcd for (C<sub>21</sub>H<sub>29</sub>N<sub>4</sub>) ([M+H]<sup>+</sup>): 325.2387; found: 325.2386.

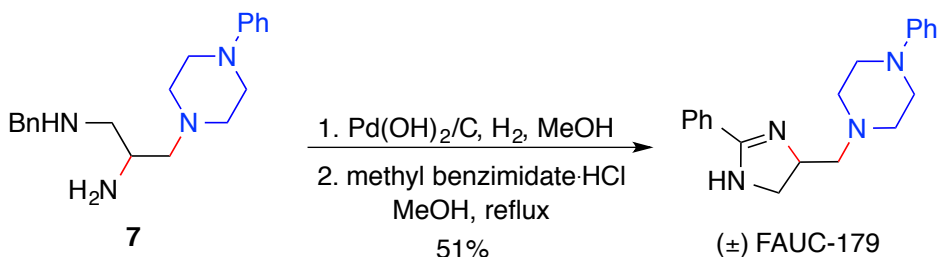

To a 25 mL round-bottomed flask was added 20% Pd(OH)<sub>2</sub>/C (50 mg), diamine **7** (26 mg, 0.08 mmol) and MeOH (5 mL) under nitrogen. An atmosphere of hydrogen was introduced by briefly evacuating the flask, then flushing with pure hydrogen (1 atm, hydrogen balloon). The mixture was stirred at room temperature overnight under H<sub>2</sub> atmosphere. The hydrogen atmosphere was then removed under vacuum, and the flask was refilled with nitrogen. The mixture was filtered through a pale of Celite and the filtrate was concentrated under reduced pressure. To the crude mixture, was added MeOH (5 mL) and methylbenzimidate hydrochloride (20 mg, 0.12 mmol) at room temperature. The resulting mixture was heated and refluxed for 1 h. Then MeOH was removed under reduced pressure. To the residue, was added EtOAc (10 mL) and a saturated aqueous solution of Na<sub>2</sub>CO<sub>3</sub> (10 mL). The organic layer was separated and the aqueous layer was extracted with EtOAc (10 mL). The combined organic solvent was removed under reduced pressure. Purification by column chromatography (100% EtOAc containing 5% TEA) gave (±)-FAUC-179 as a white solid (13 mg, 51% yield). <sup>1</sup>H NMR (400 MHz, CD<sub>3</sub>OD): δ 7.89 (d, *J* = 7.6 Hz, 2H), 7.80 (t, *J* = 7.6 Hz, 1H), 7.66 (t, *J* = 8.0 Hz, 2H), 7.24 (t, *J* = 8.0 Hz, 2H), 6.98 (d, *J* = 8.4 Hz, 2H), 6.85 (t, *J* = 7.2 Hz, 1H), 4.77–4.65 (m, 1H), 4.21 (t, *J* = 11.6 Hz, 1H), 3.90 (dd, *J* = 11.6, 7.6 Hz, 1H), 3.28–3.18 (m, 4H), 2.94–2.67 (m, 6H). Spectroscopic data was identical to that reported previously.<sup>5</sup>

## IX. References.

1. S. Nicolai, C. Piemontesi and J. Waser, *Angew. Chem. Int. Ed.* **2011**, *50*, 4680.
2. F. C. Sequeira, B. W. Turnpenny and S. R. Chemler, *Angew. Chem. Int. Ed.* **2010**, *49*, 6365.
3. K. Komeyama, K. Takahashi and K. Takaki, *Org. Lett.* **2008**, *10*, 5119.
4. D. J. Wardrop, E. G. Bowen, R. E. Forslund, A. D. Sussman and S. L. Weerasekera, *J. Am. Chem. Soc.* **2010**, *132*, 1188.
5. J. Einsiedel, H. Hubner and P. Gmeiner, *Bioorg. Med. Chem. Lett.* **2001**, *11*, 2533.

## X. NMR Spectra.

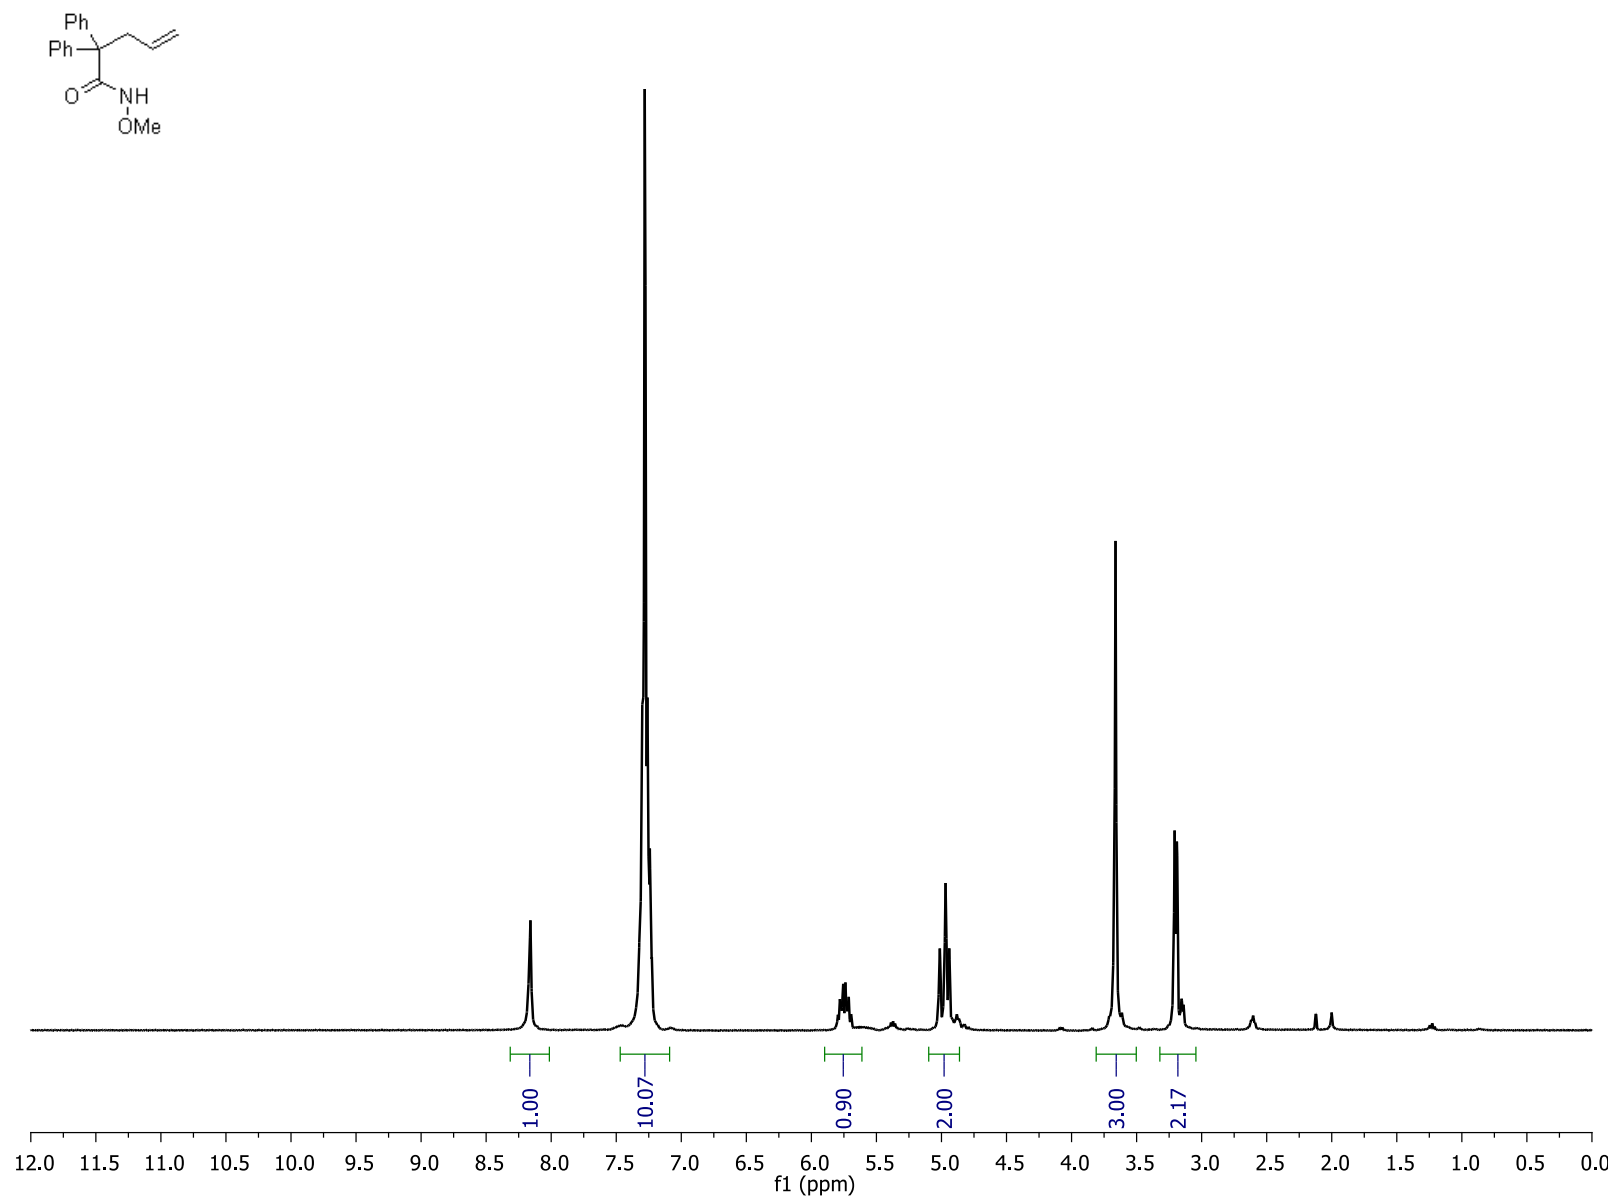

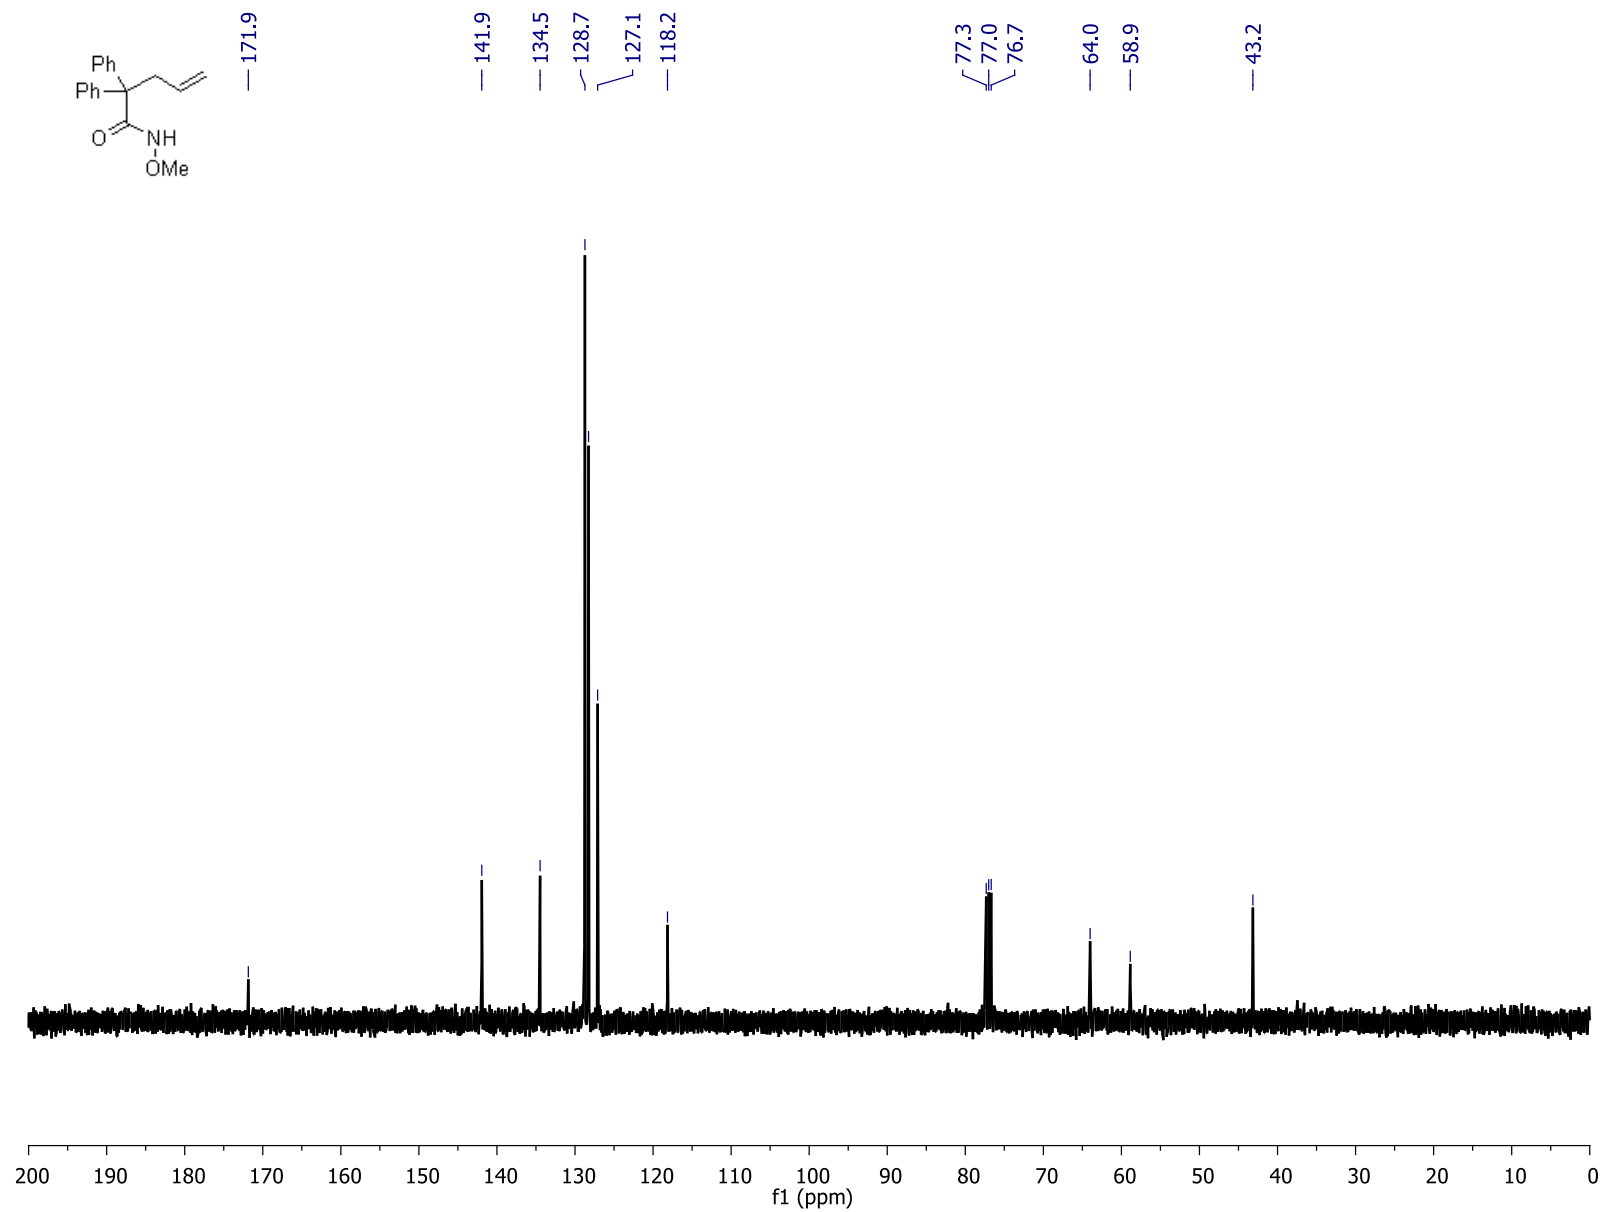

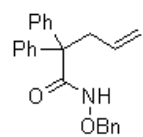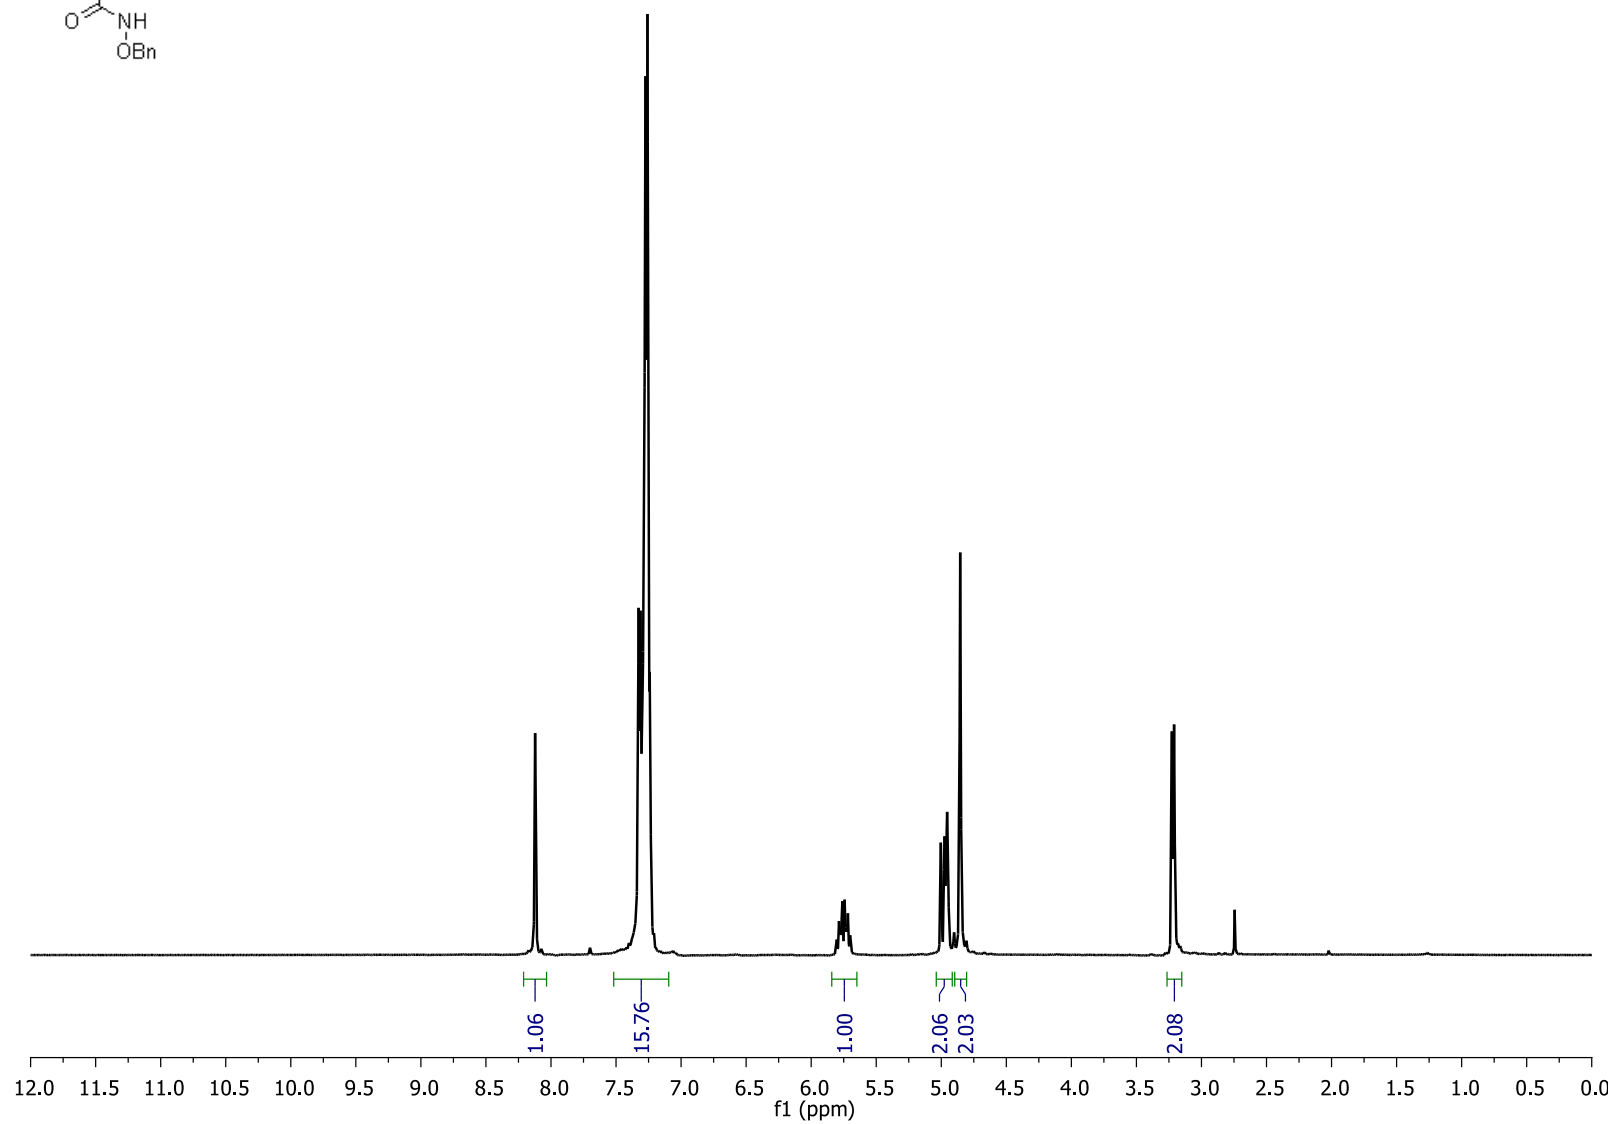



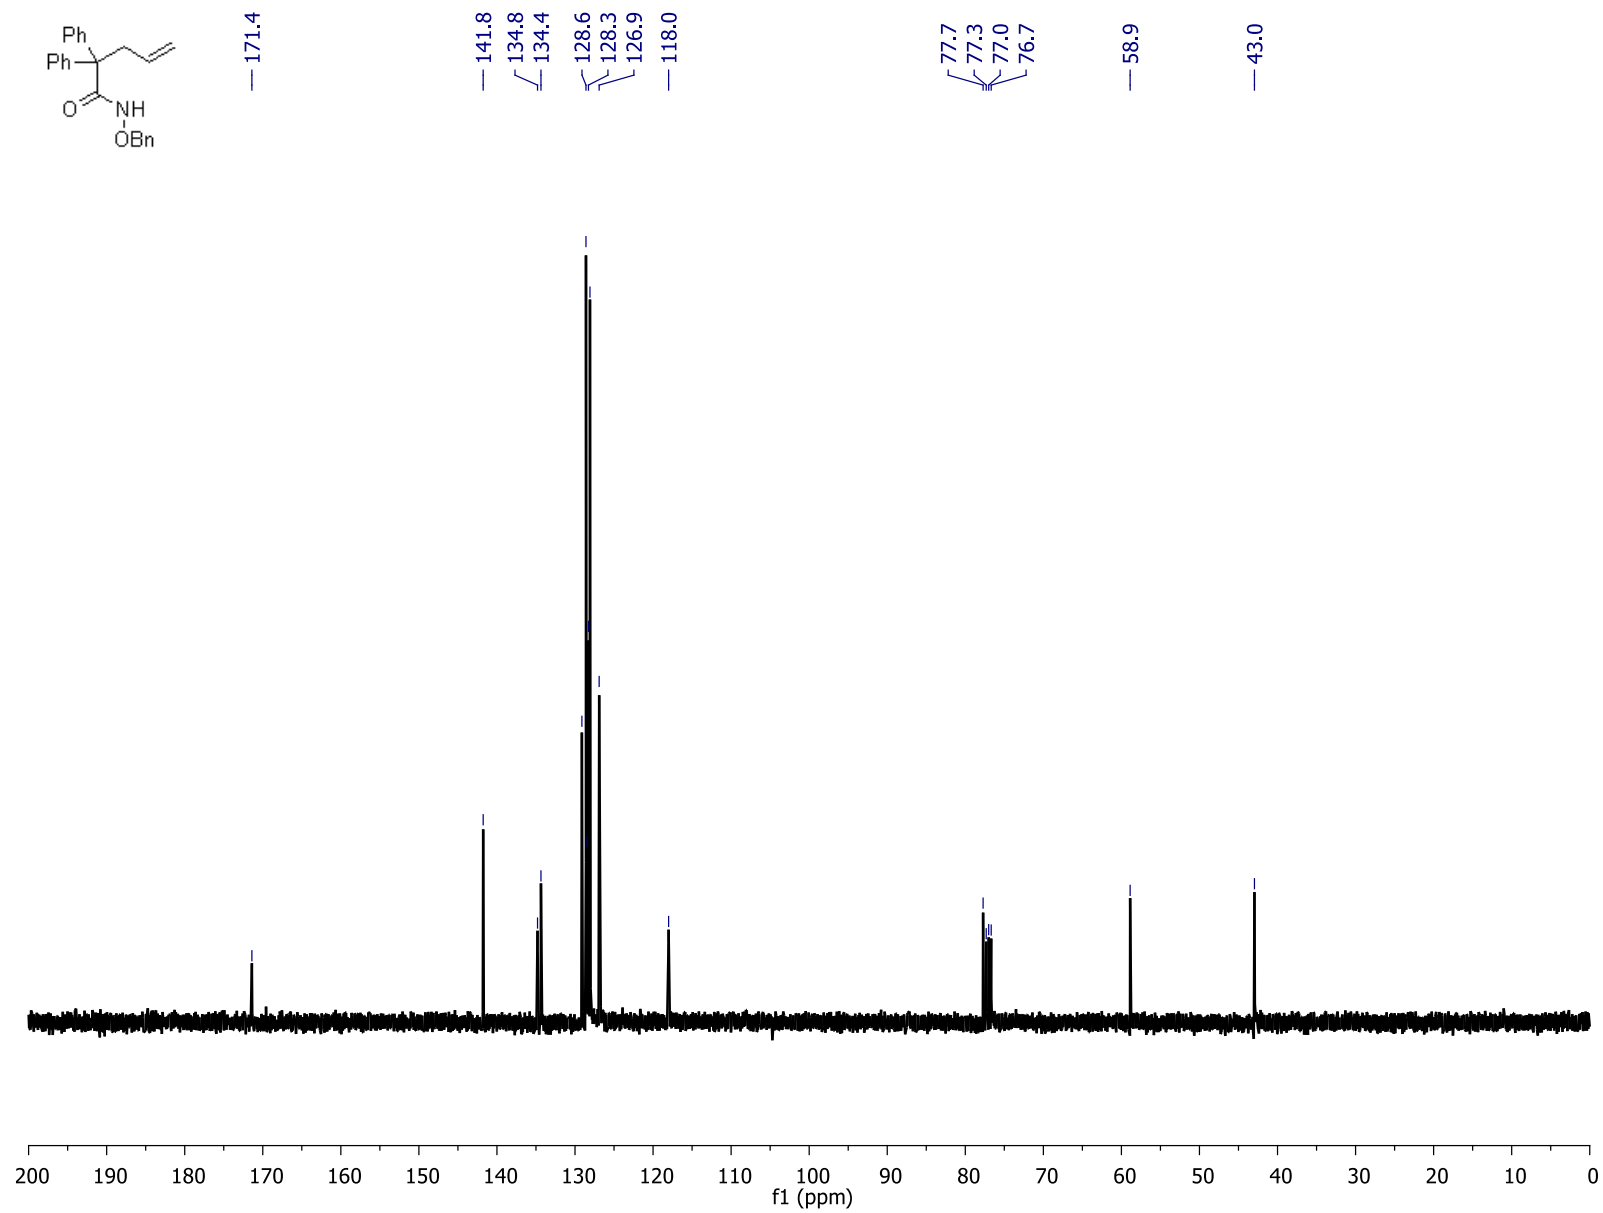

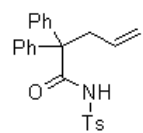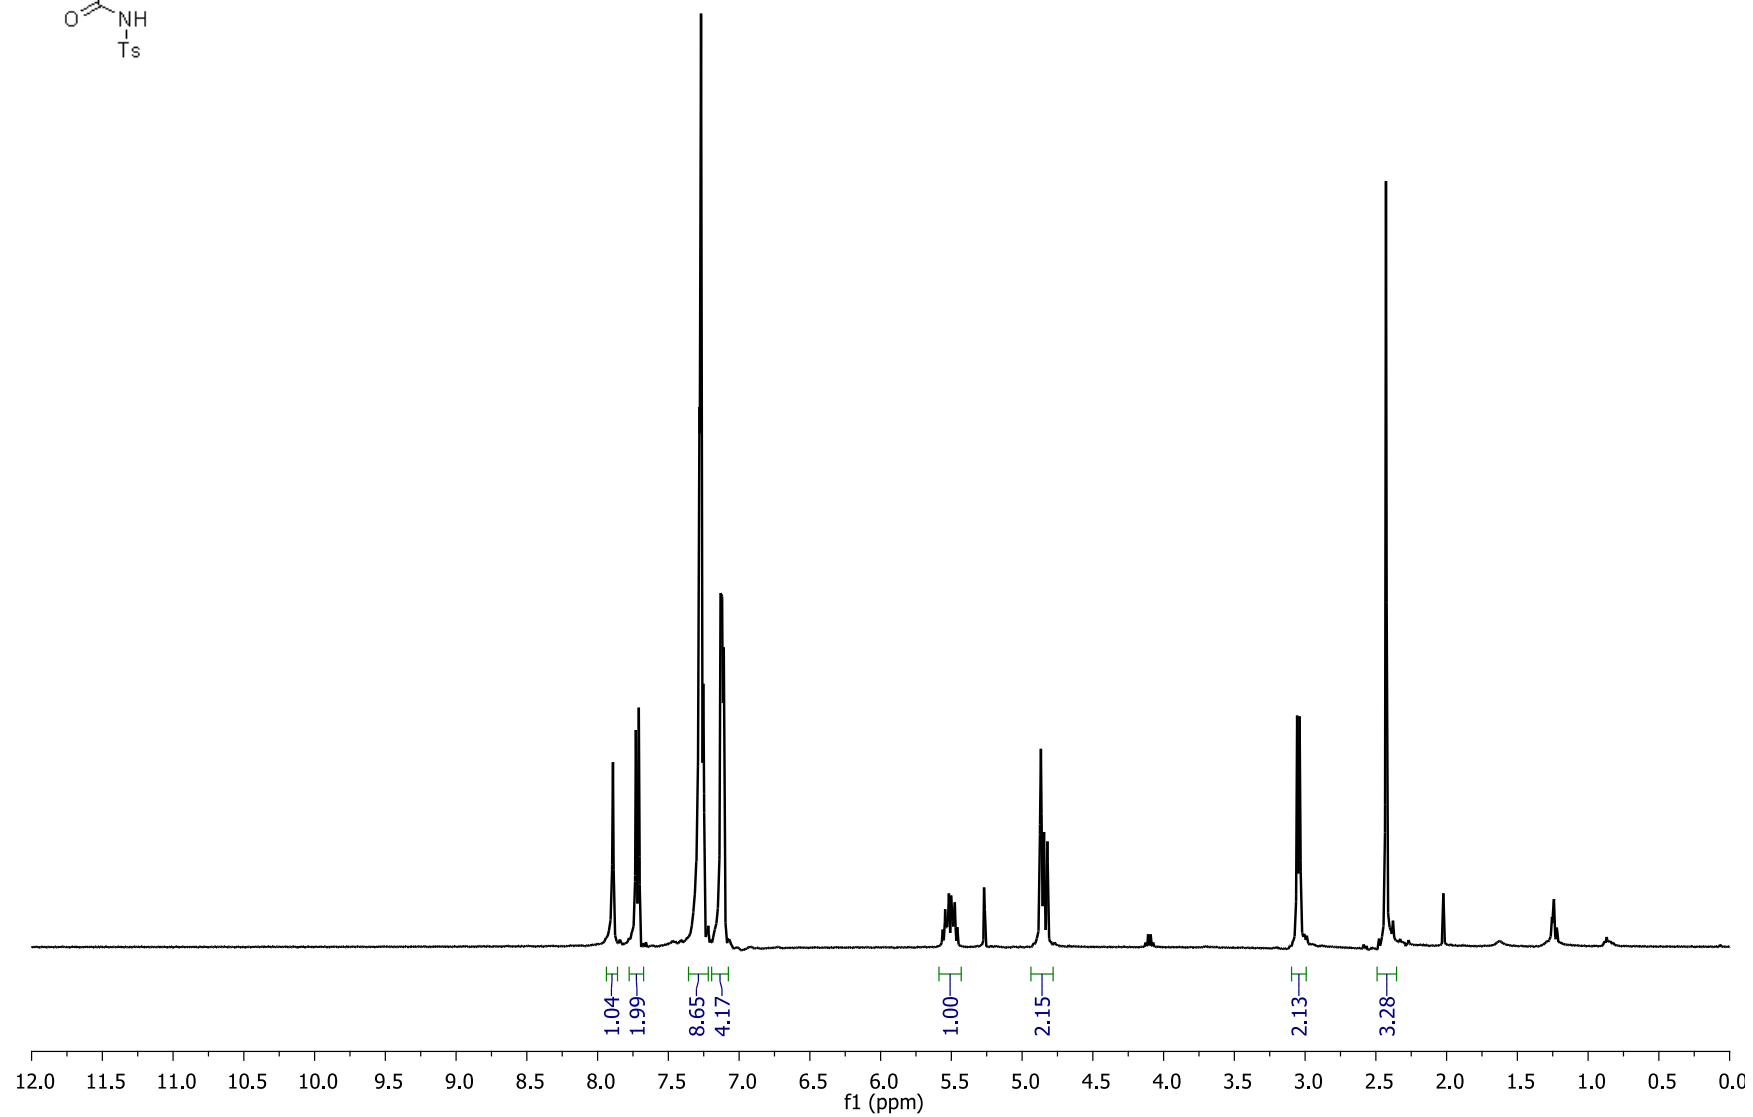

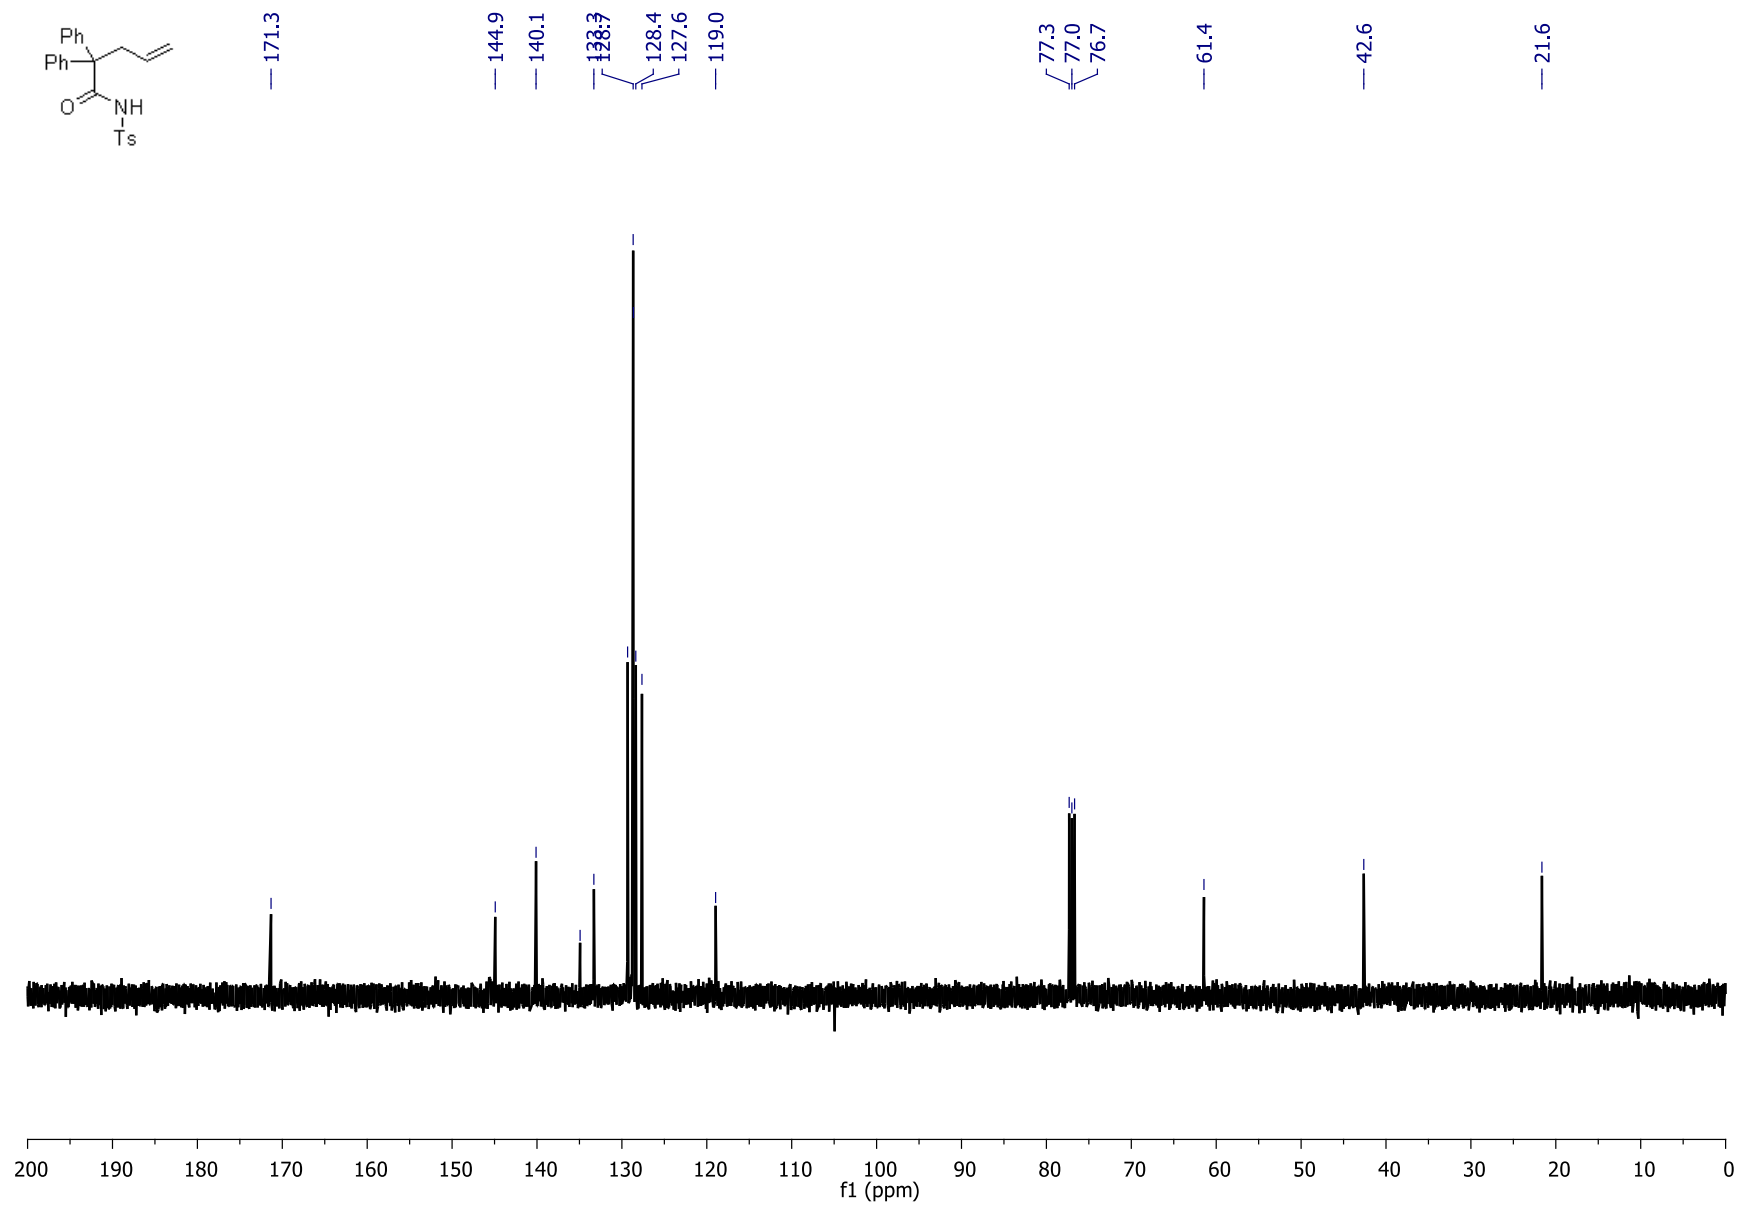

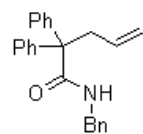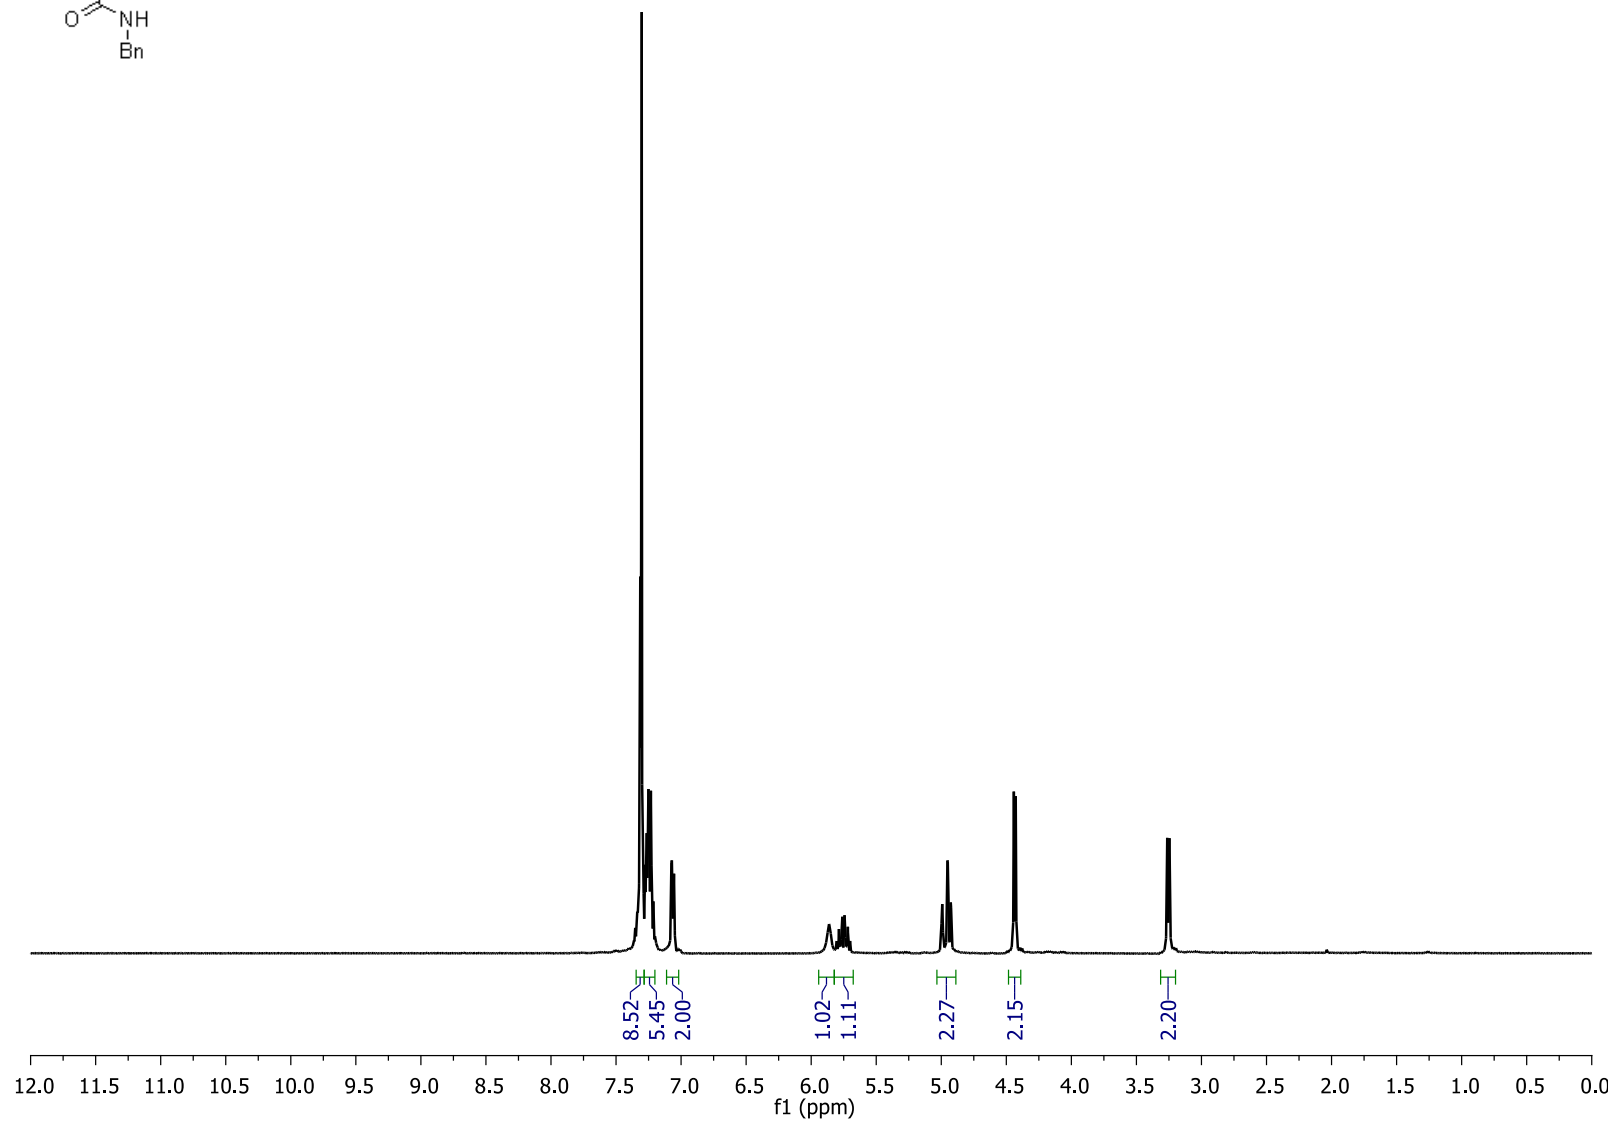

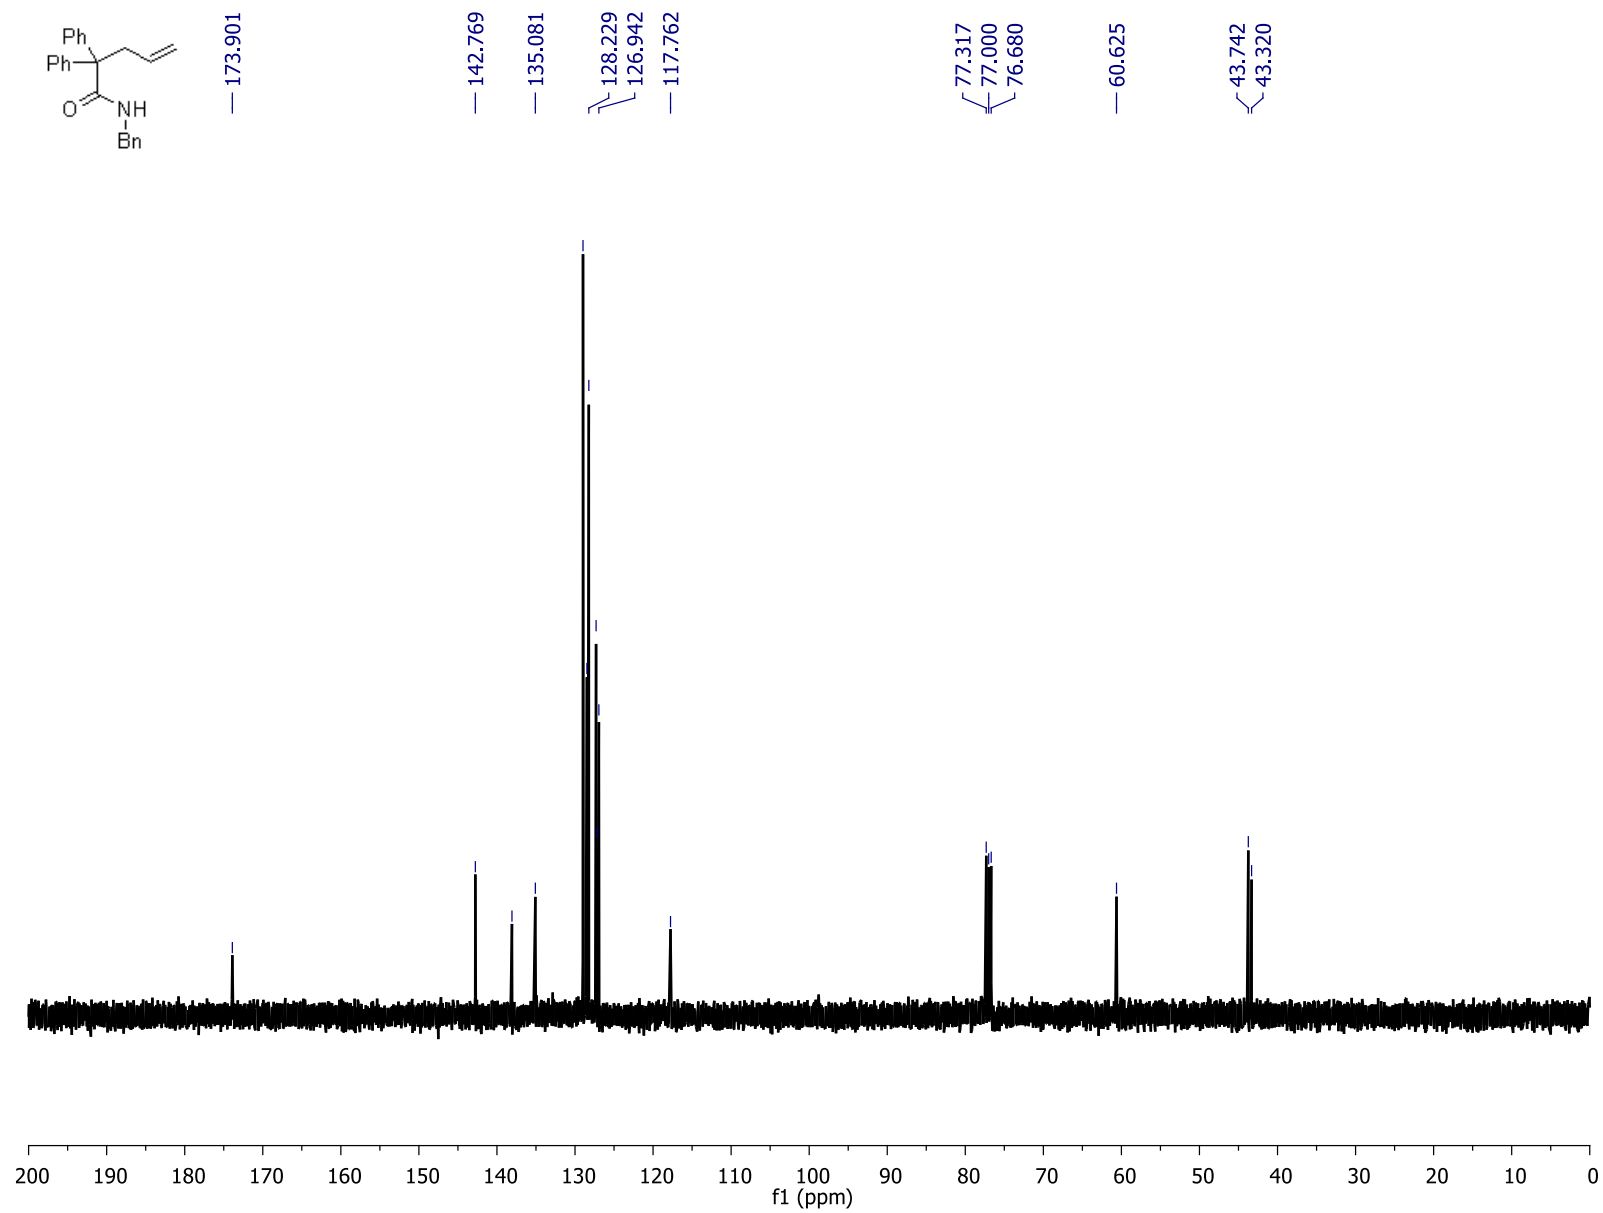

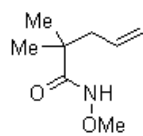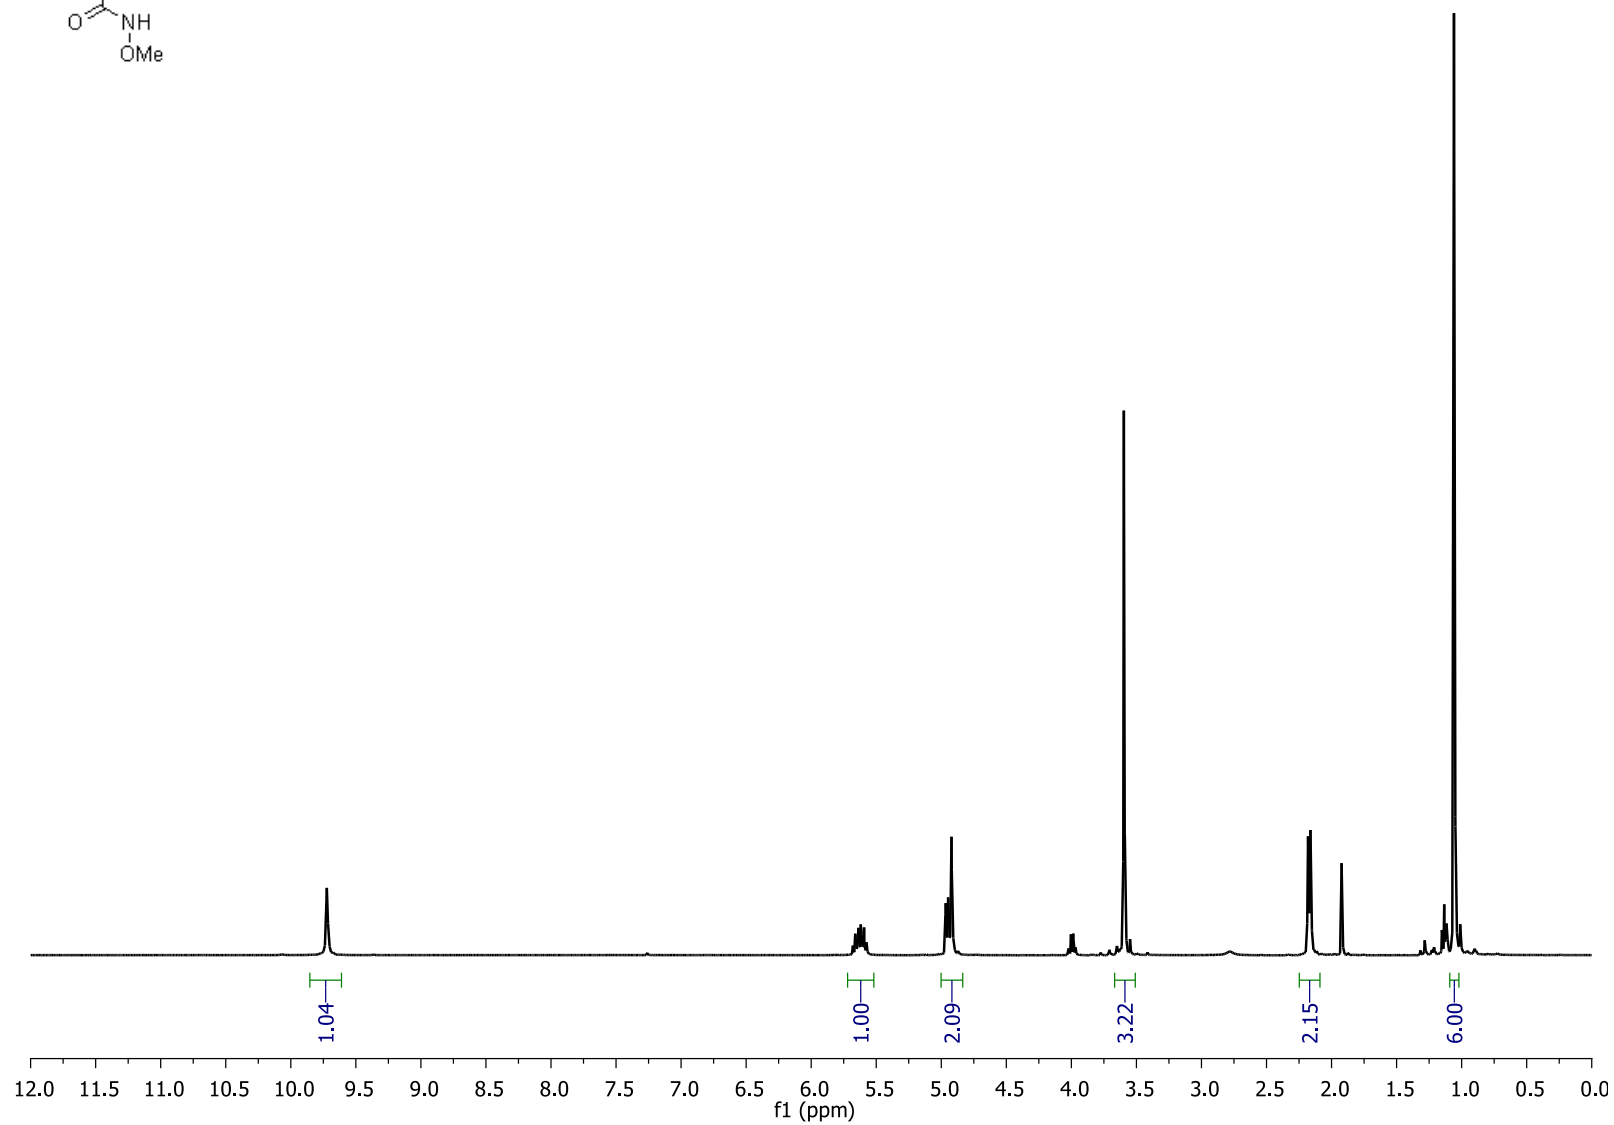

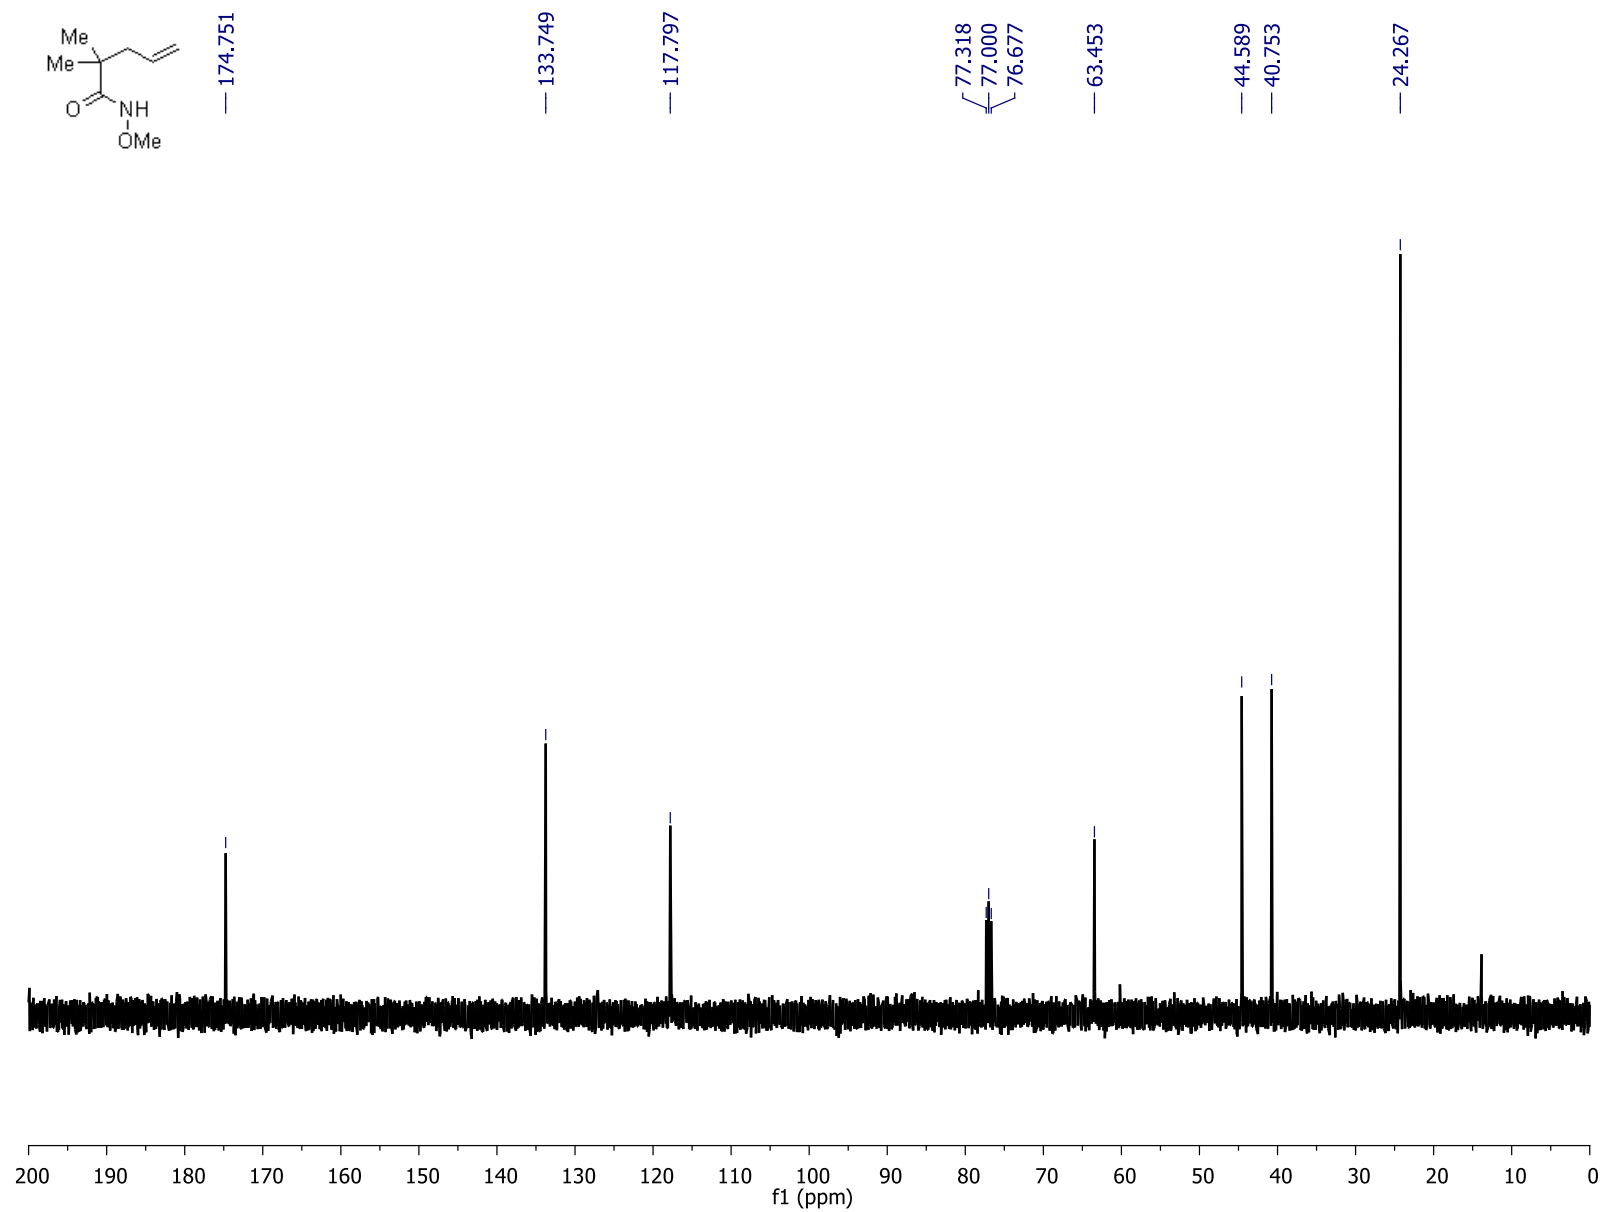

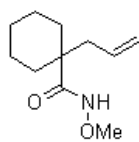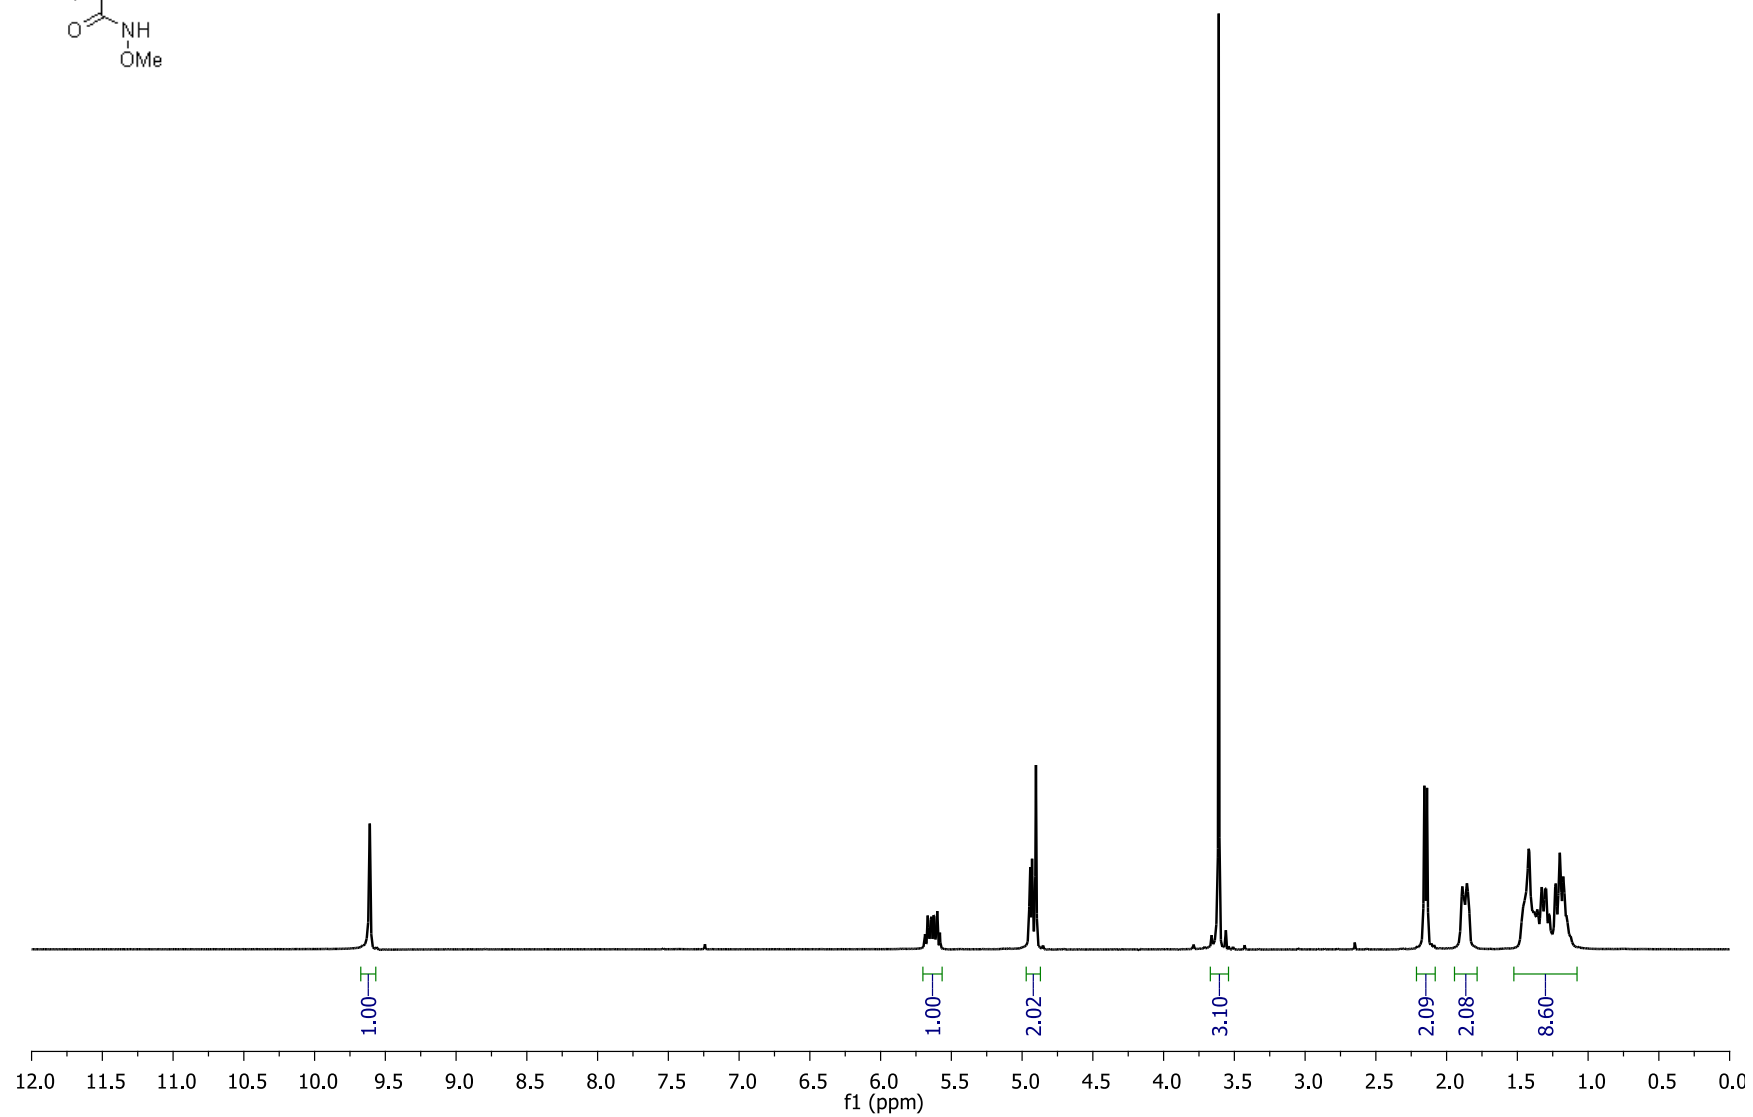



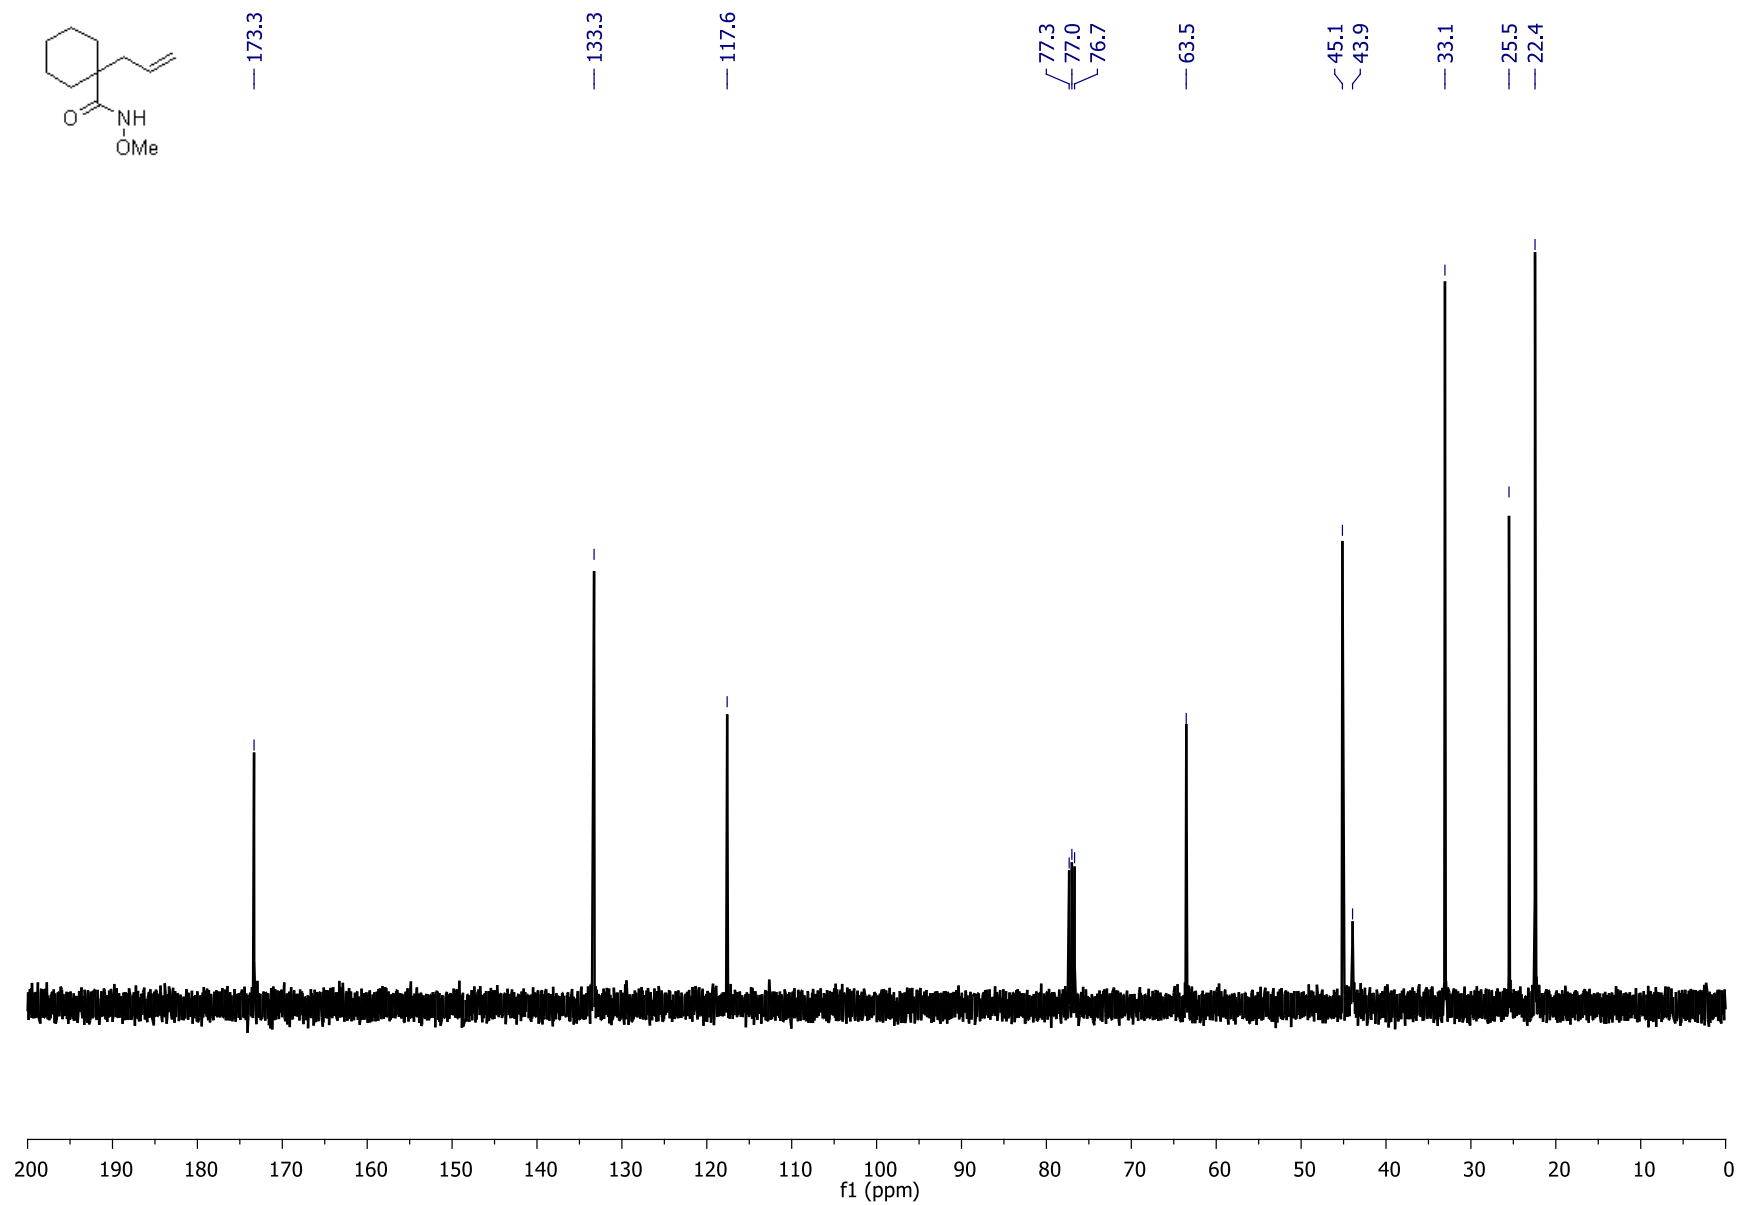

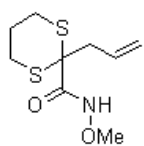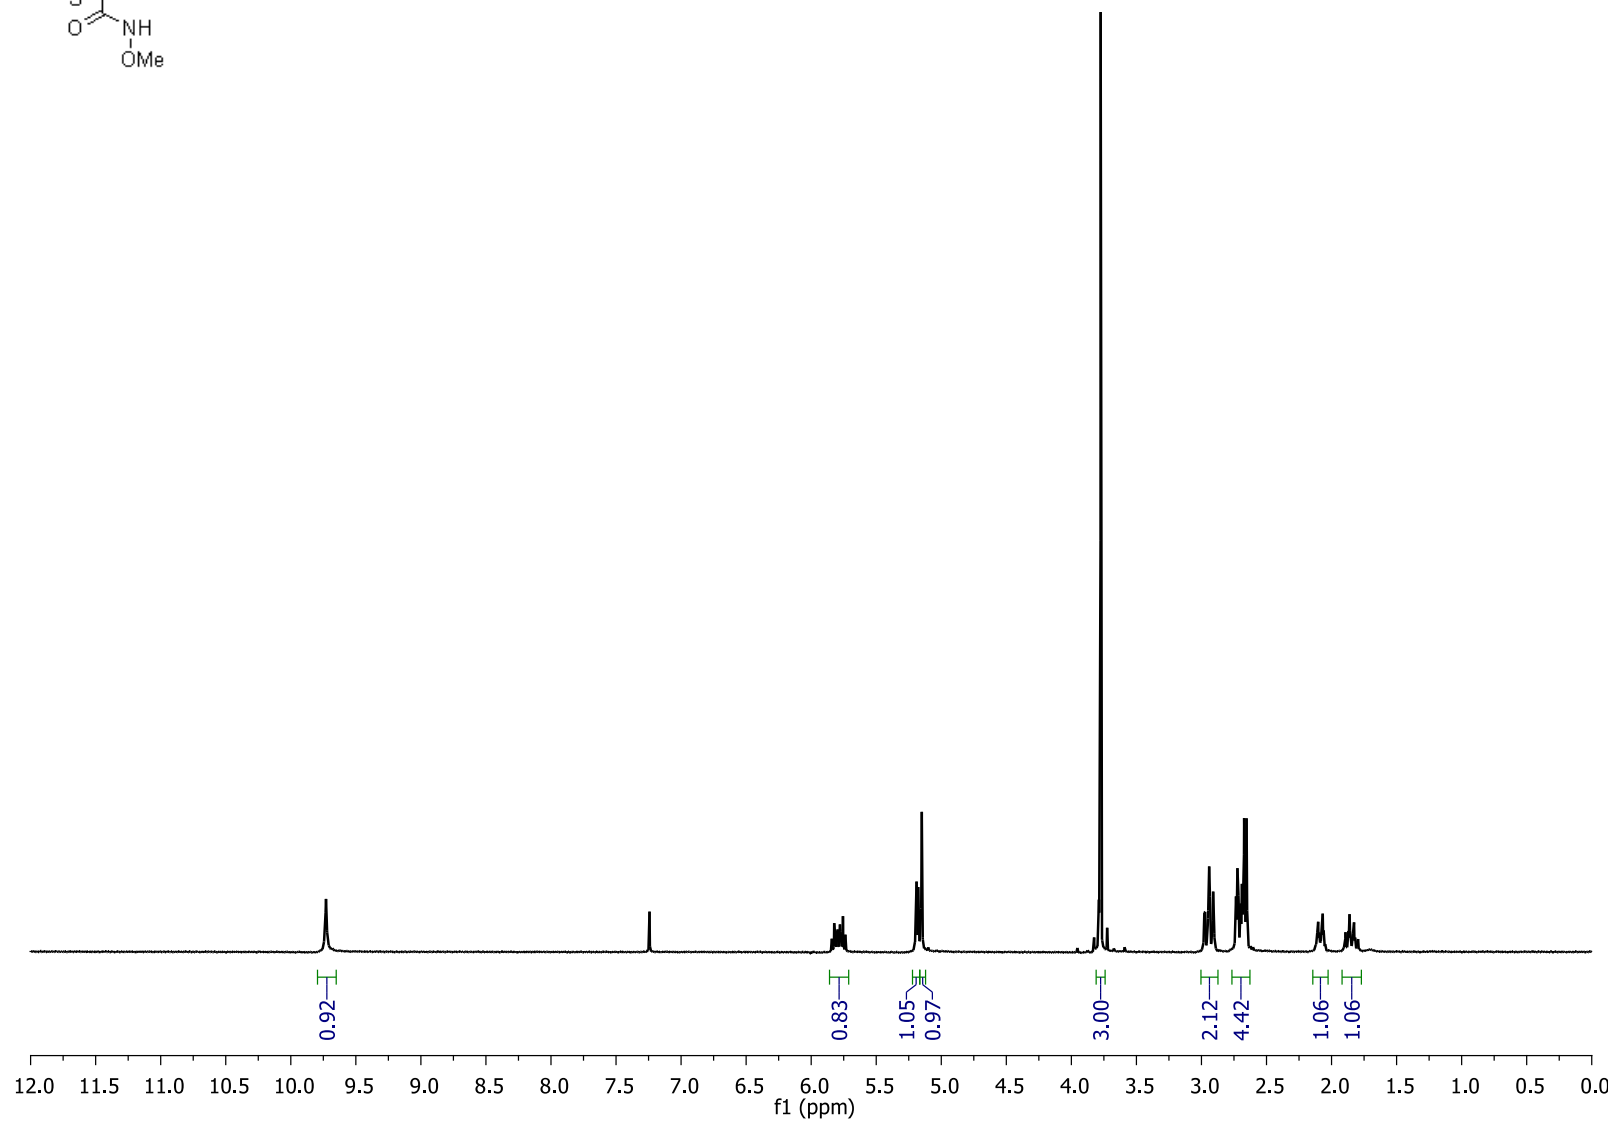

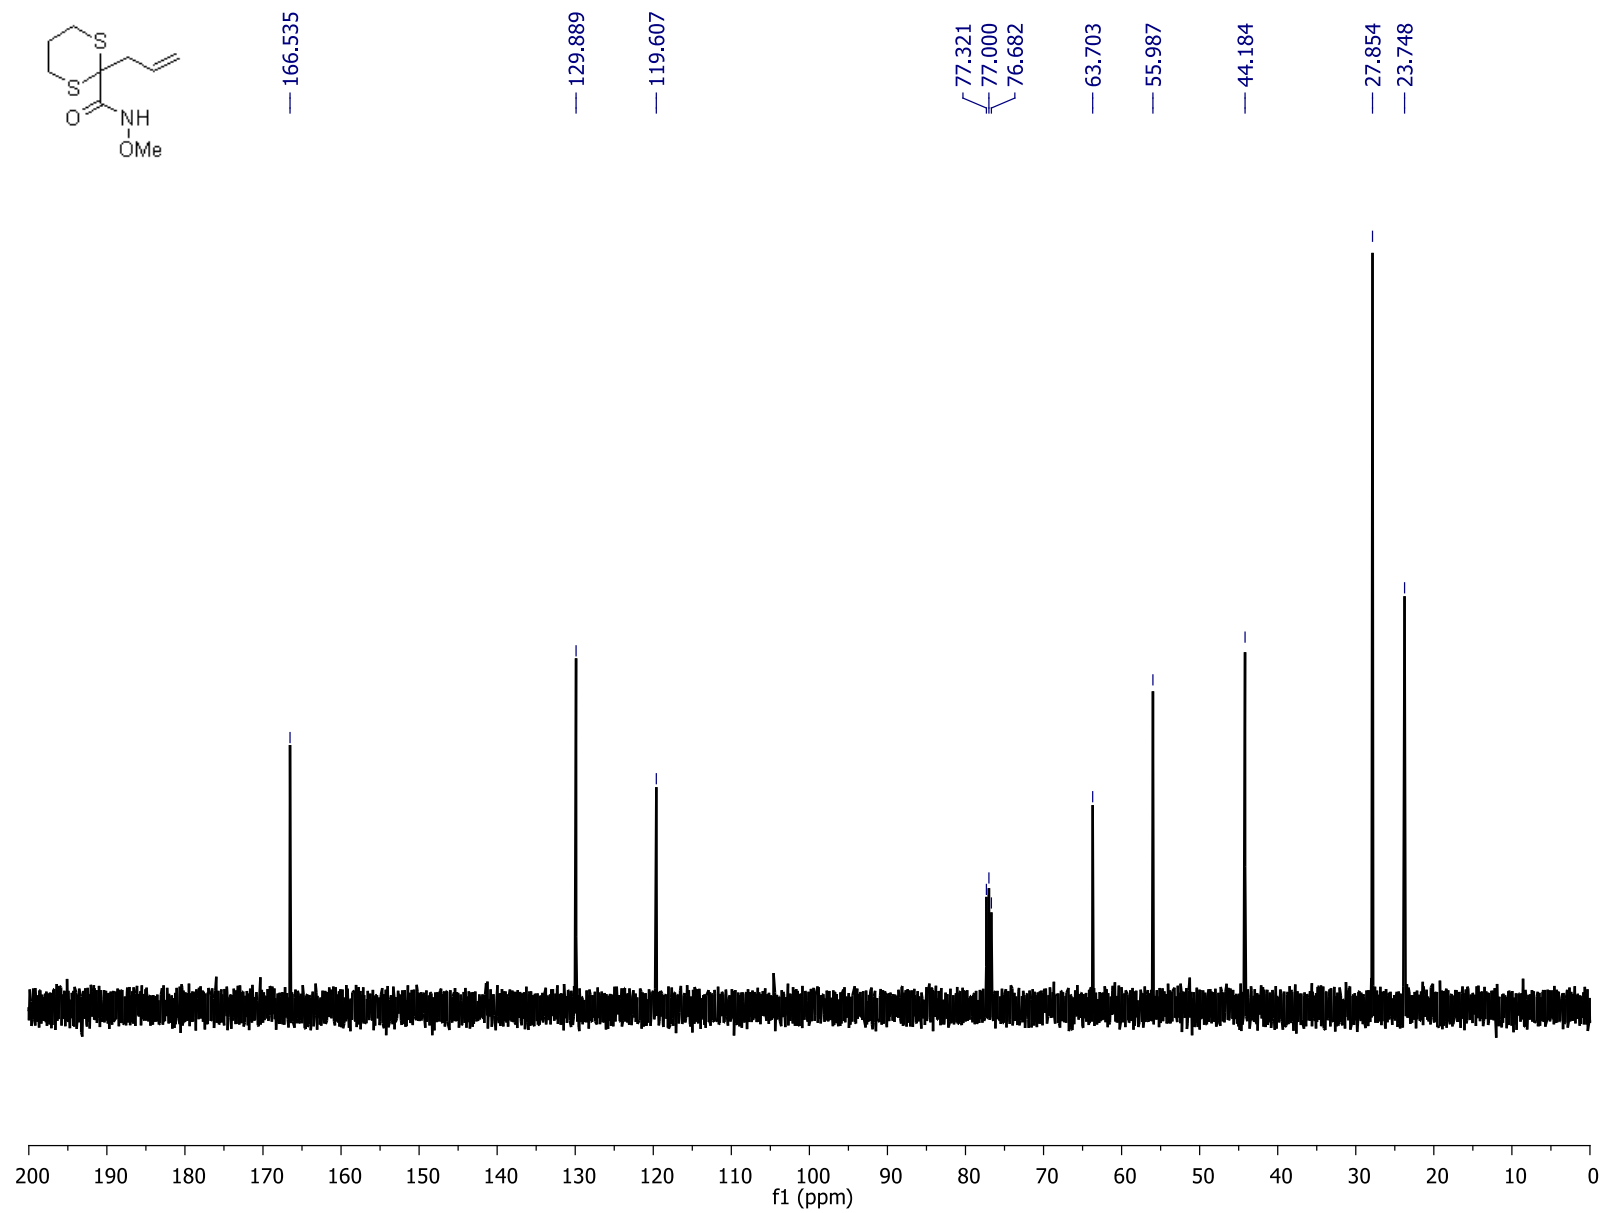

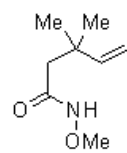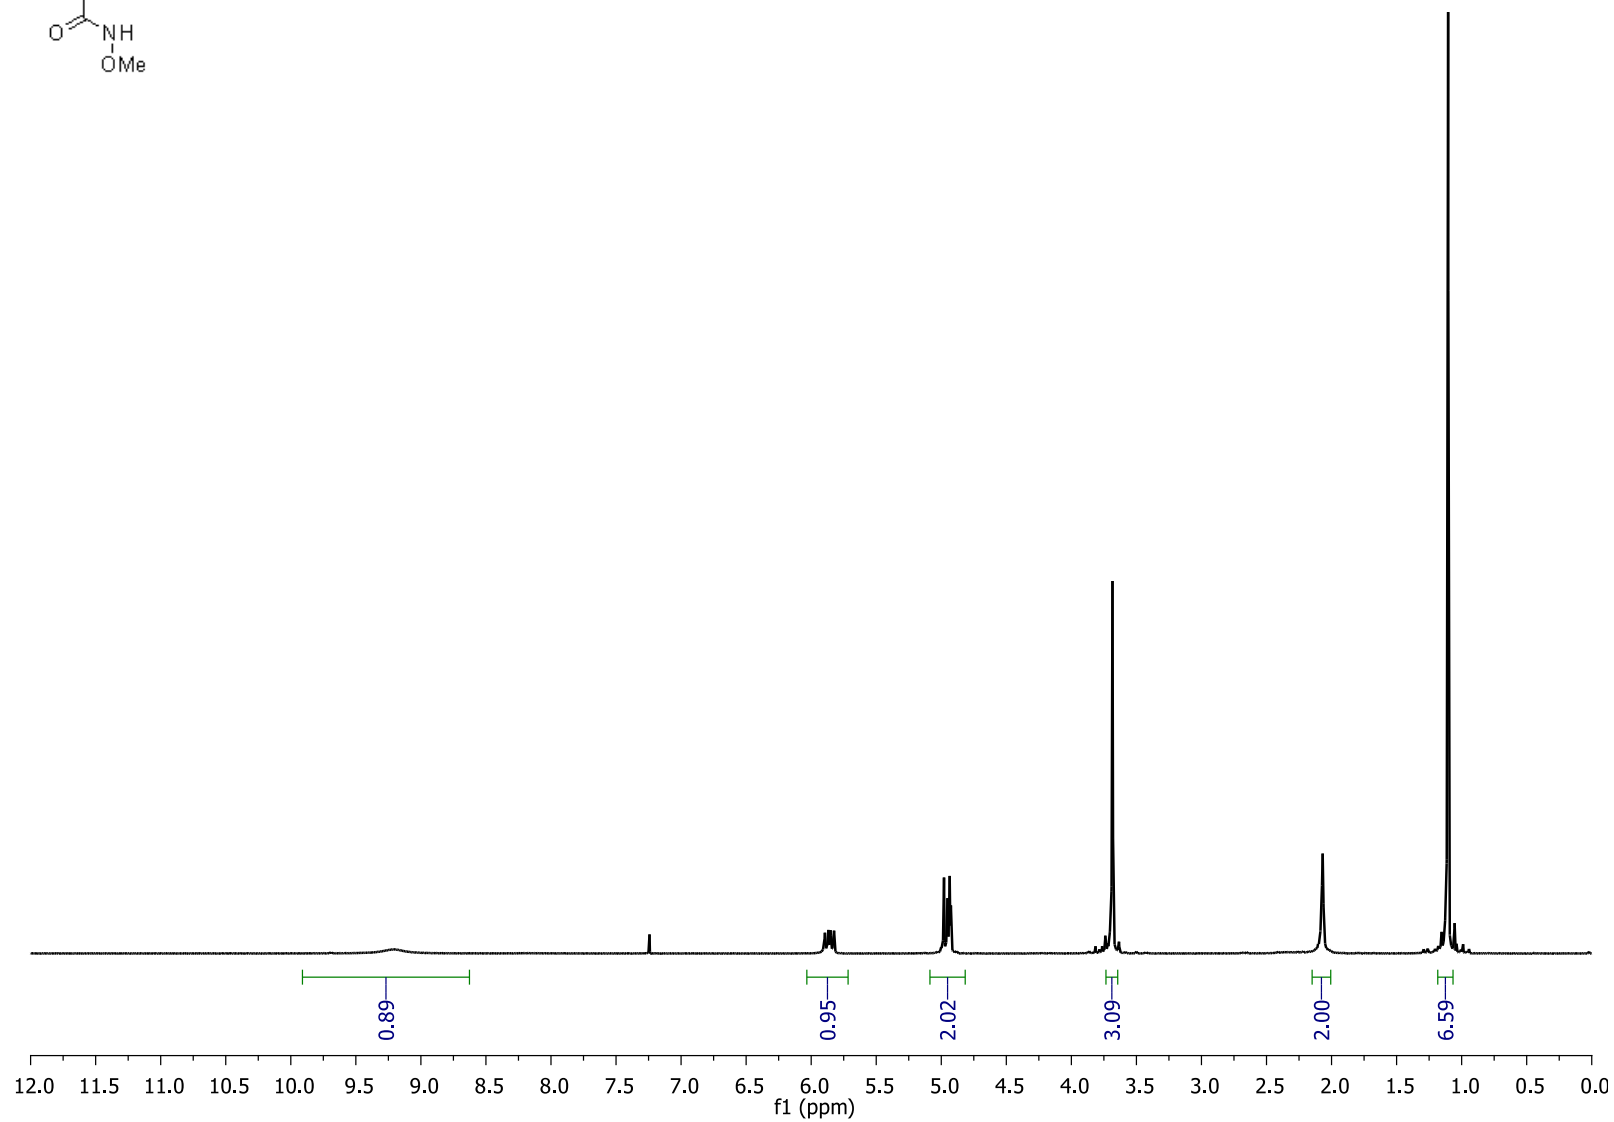

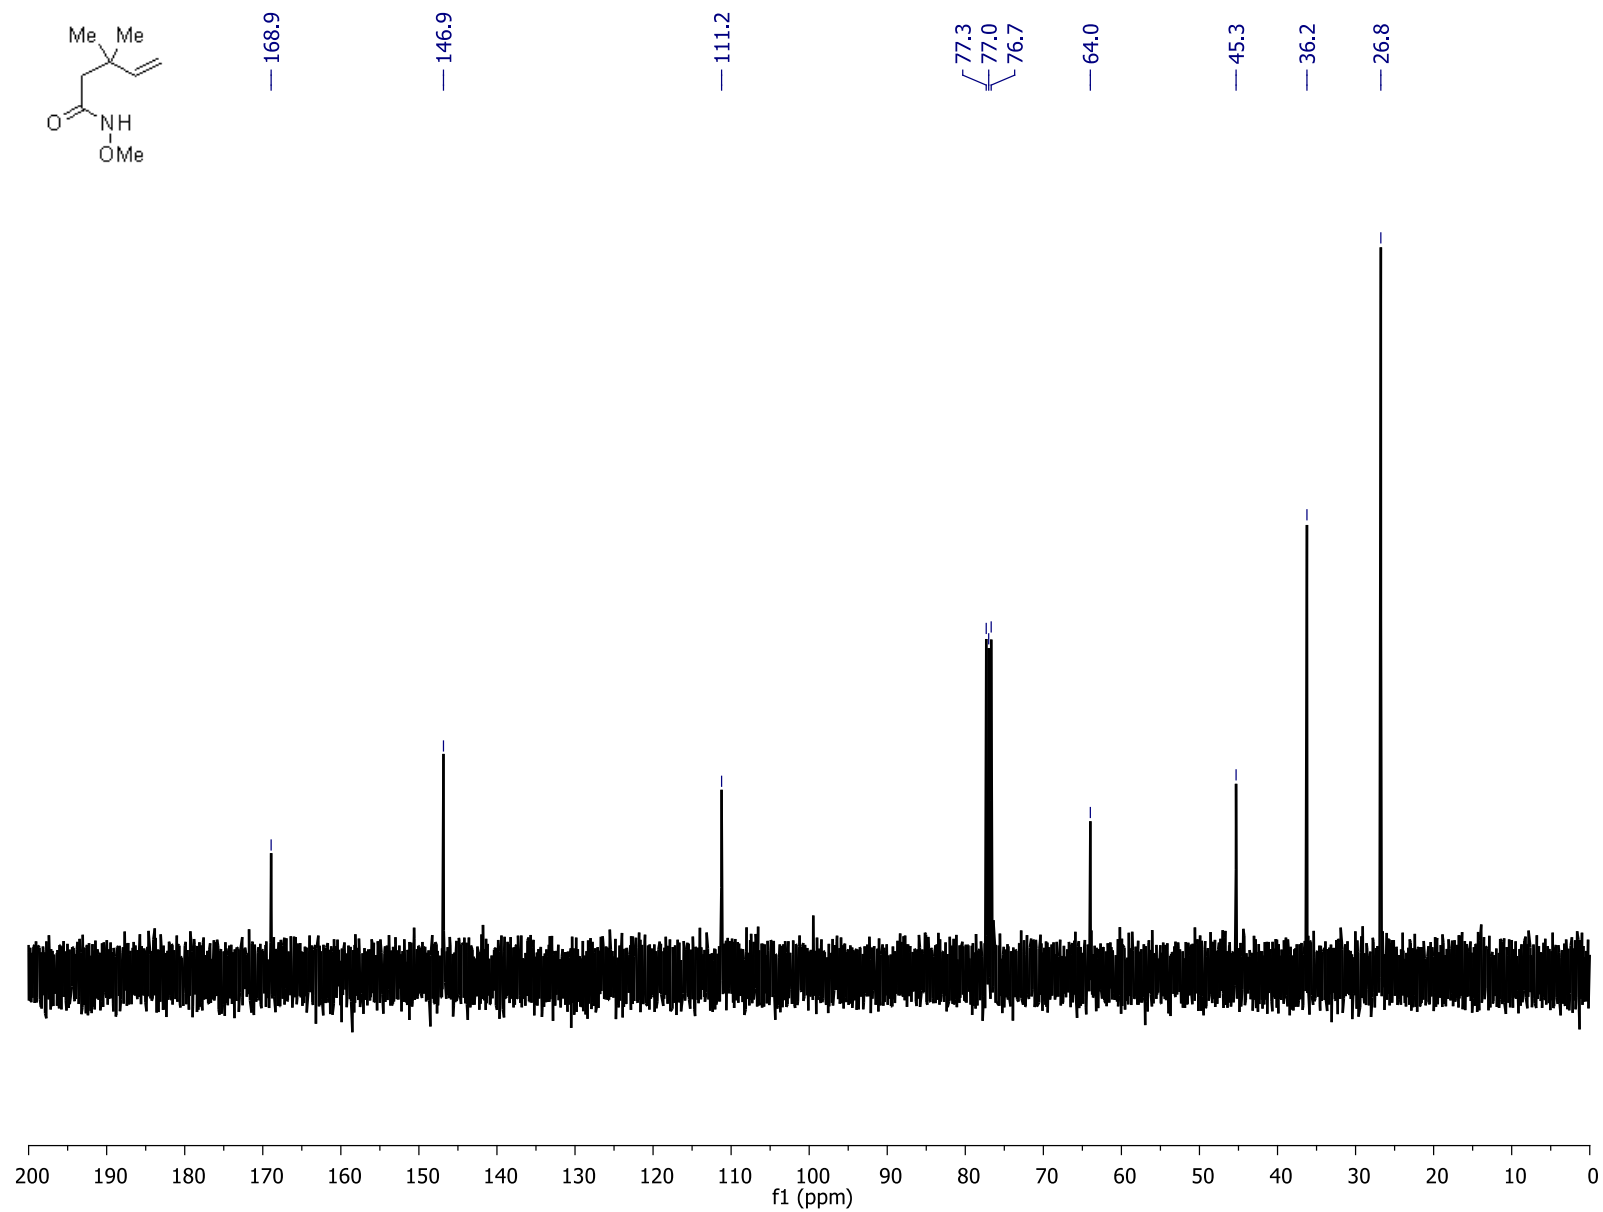

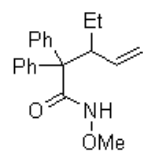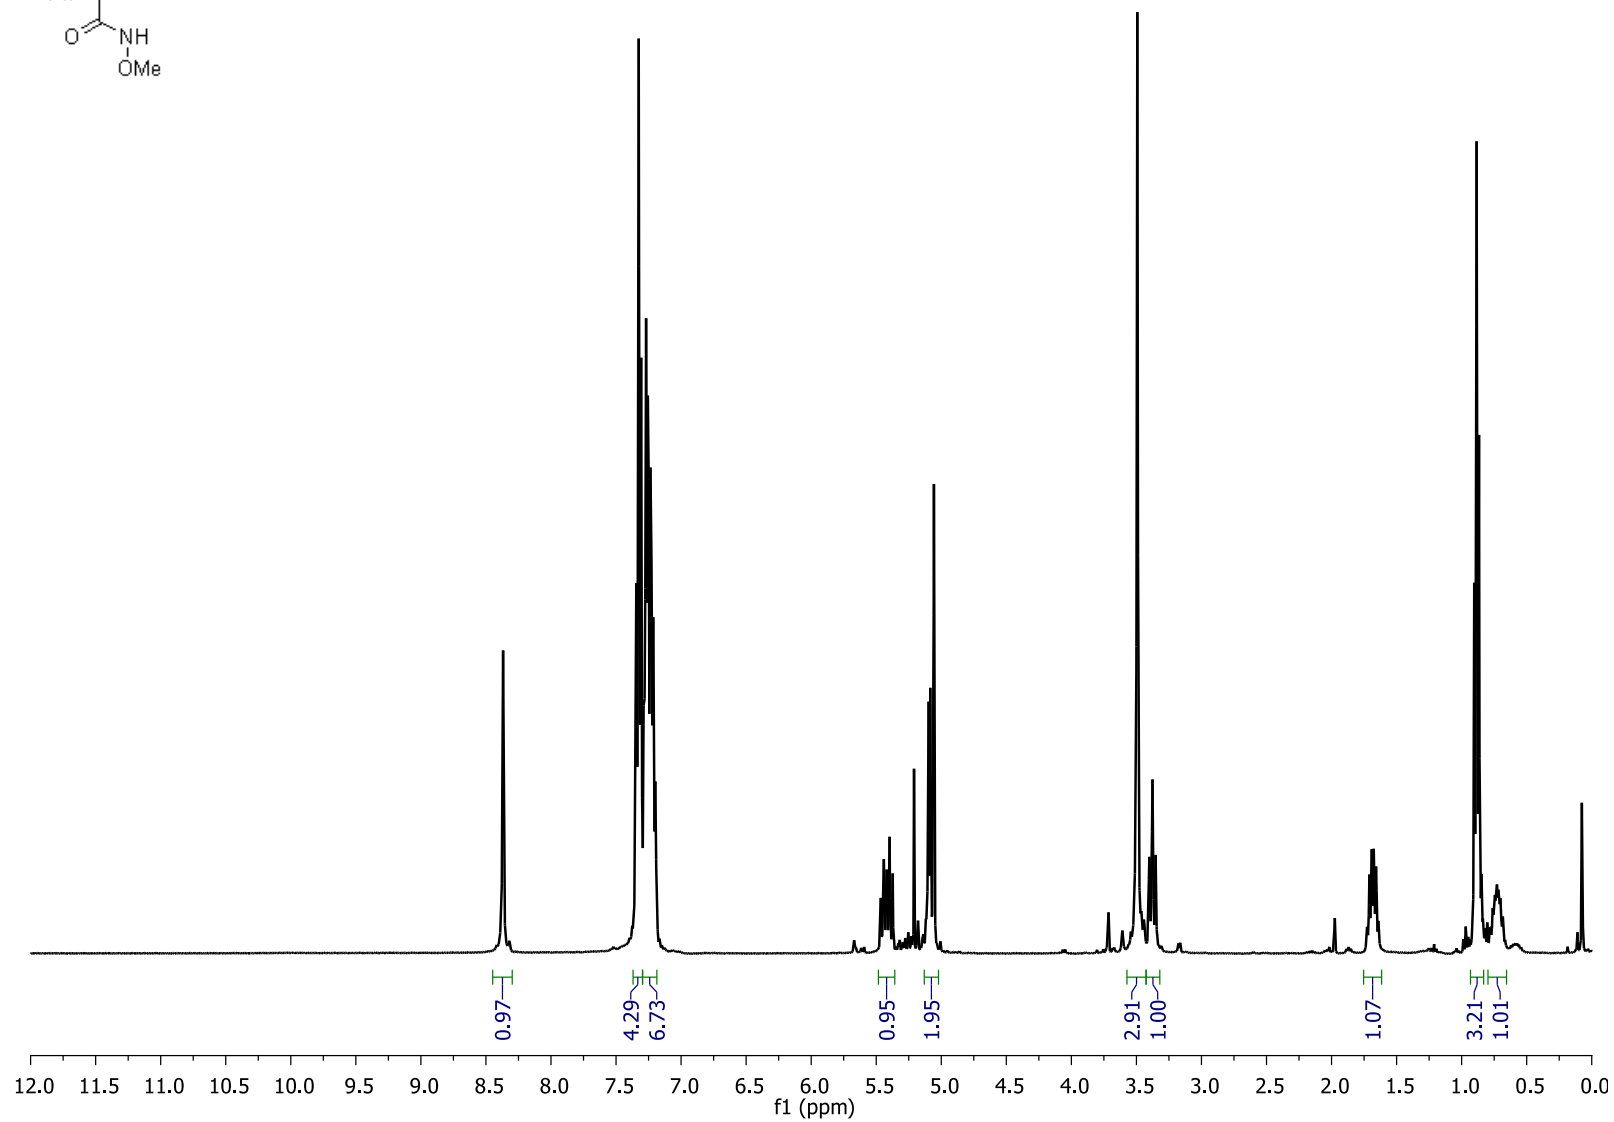

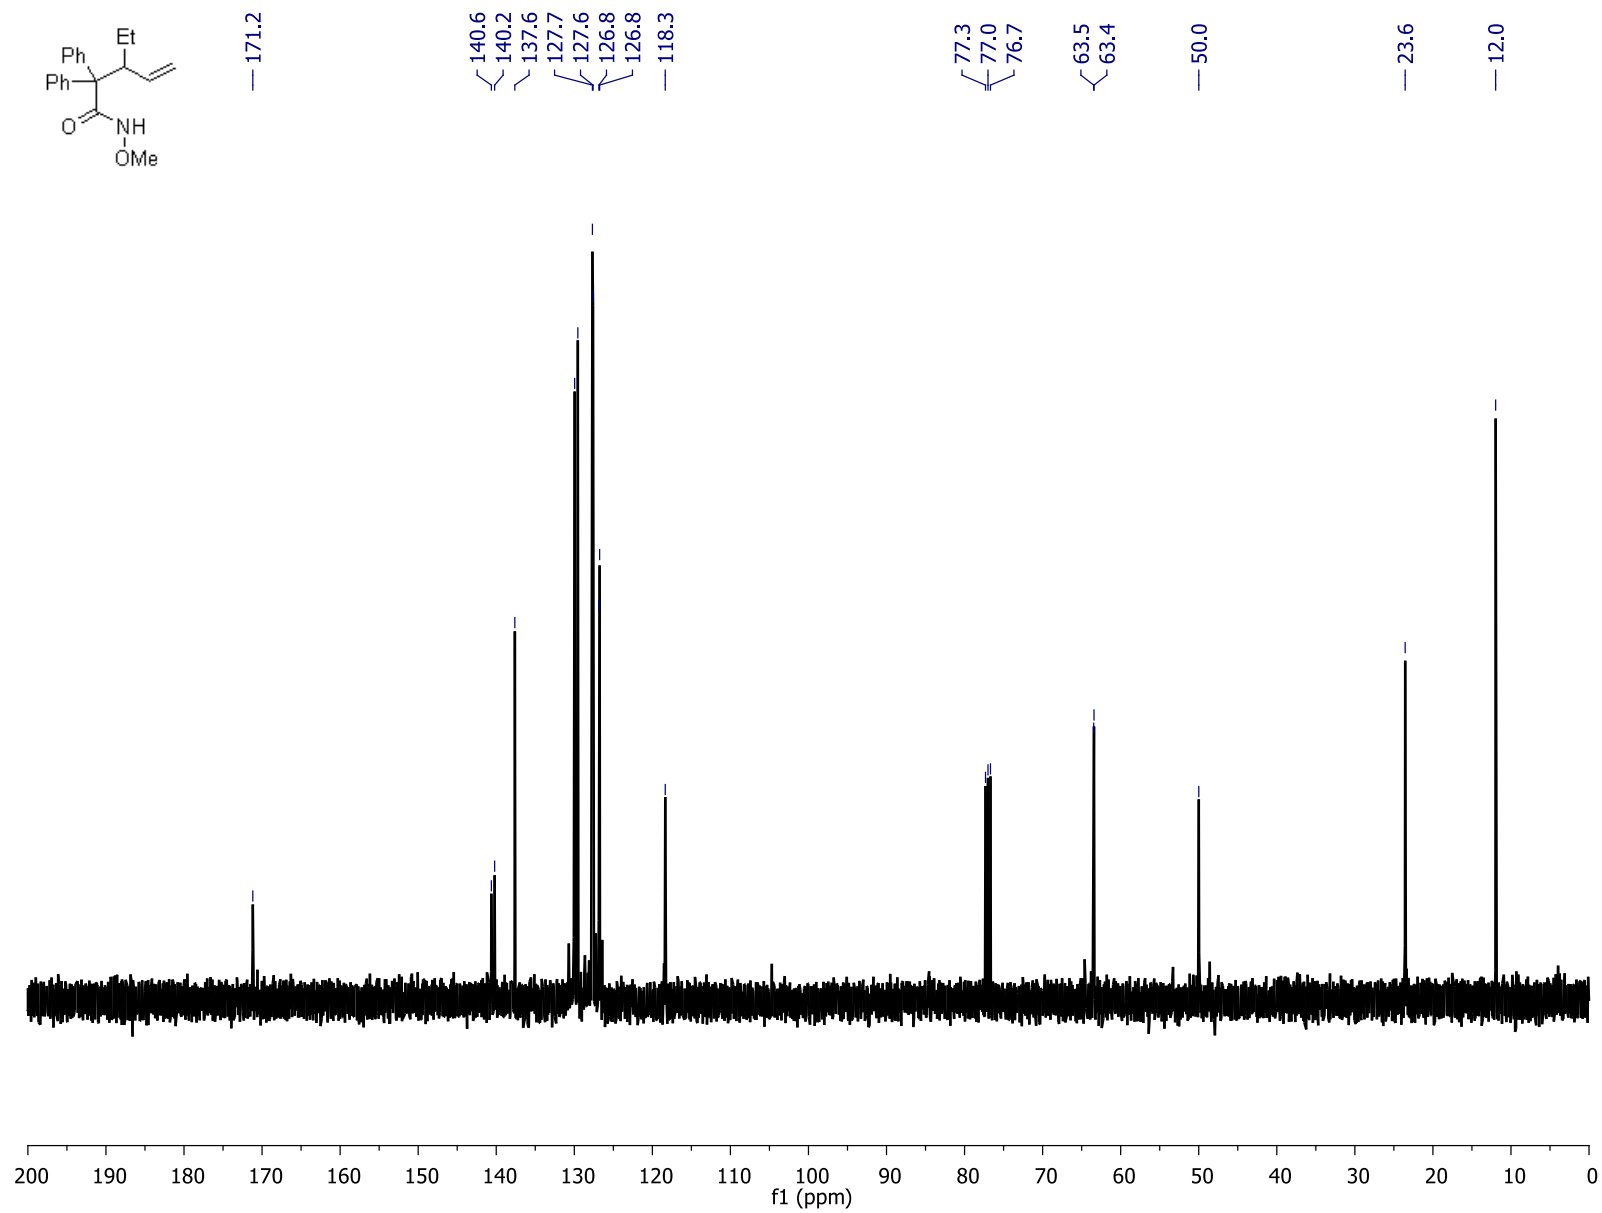

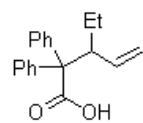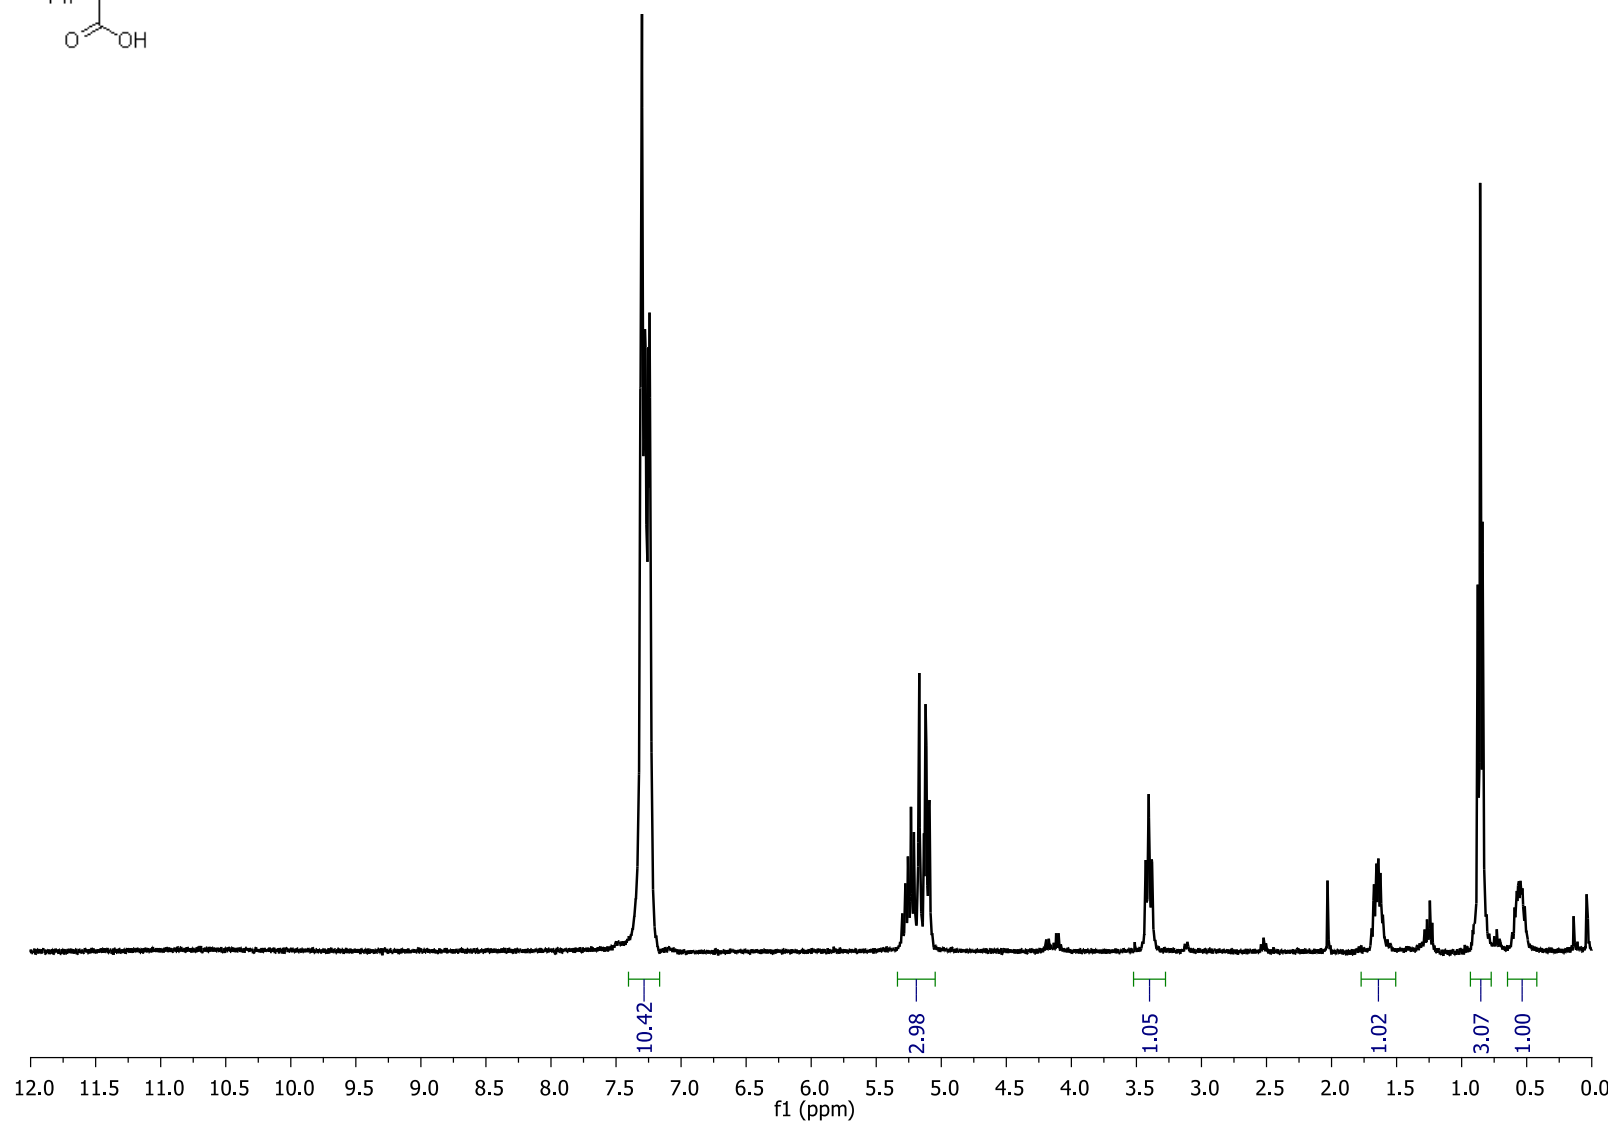



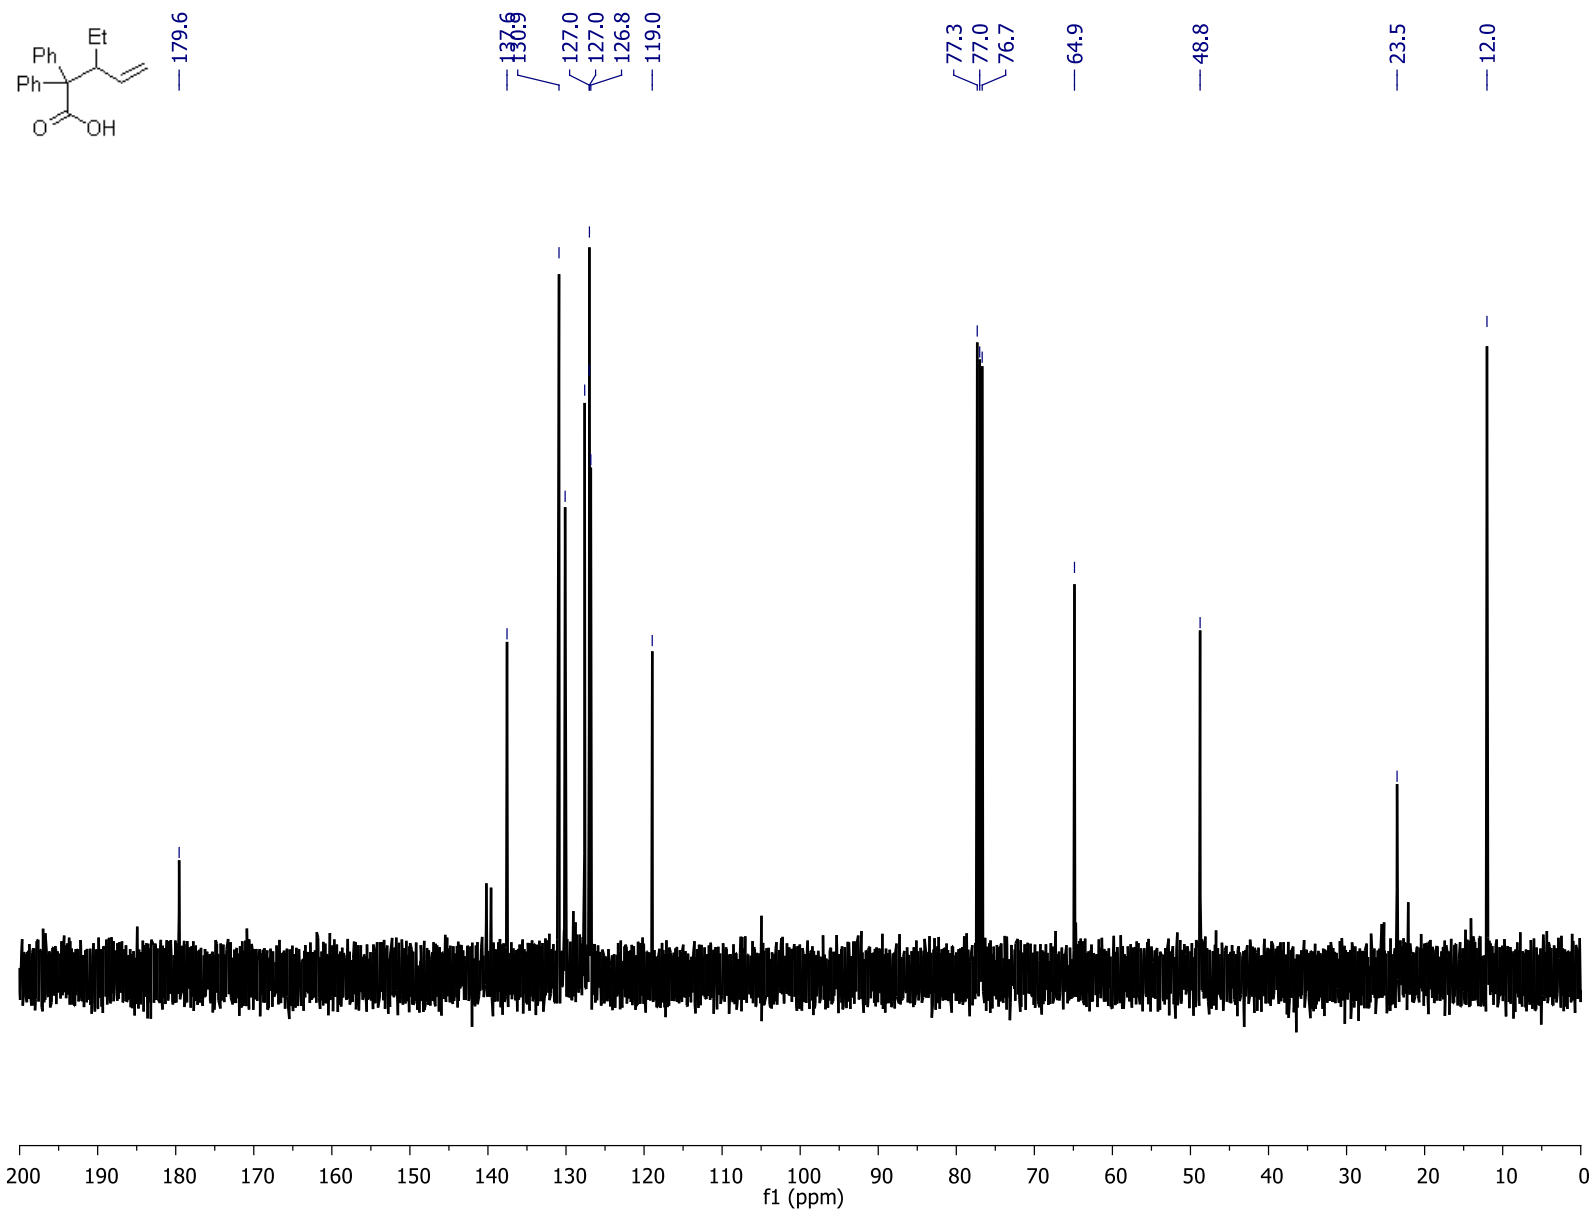

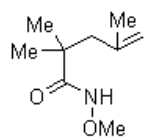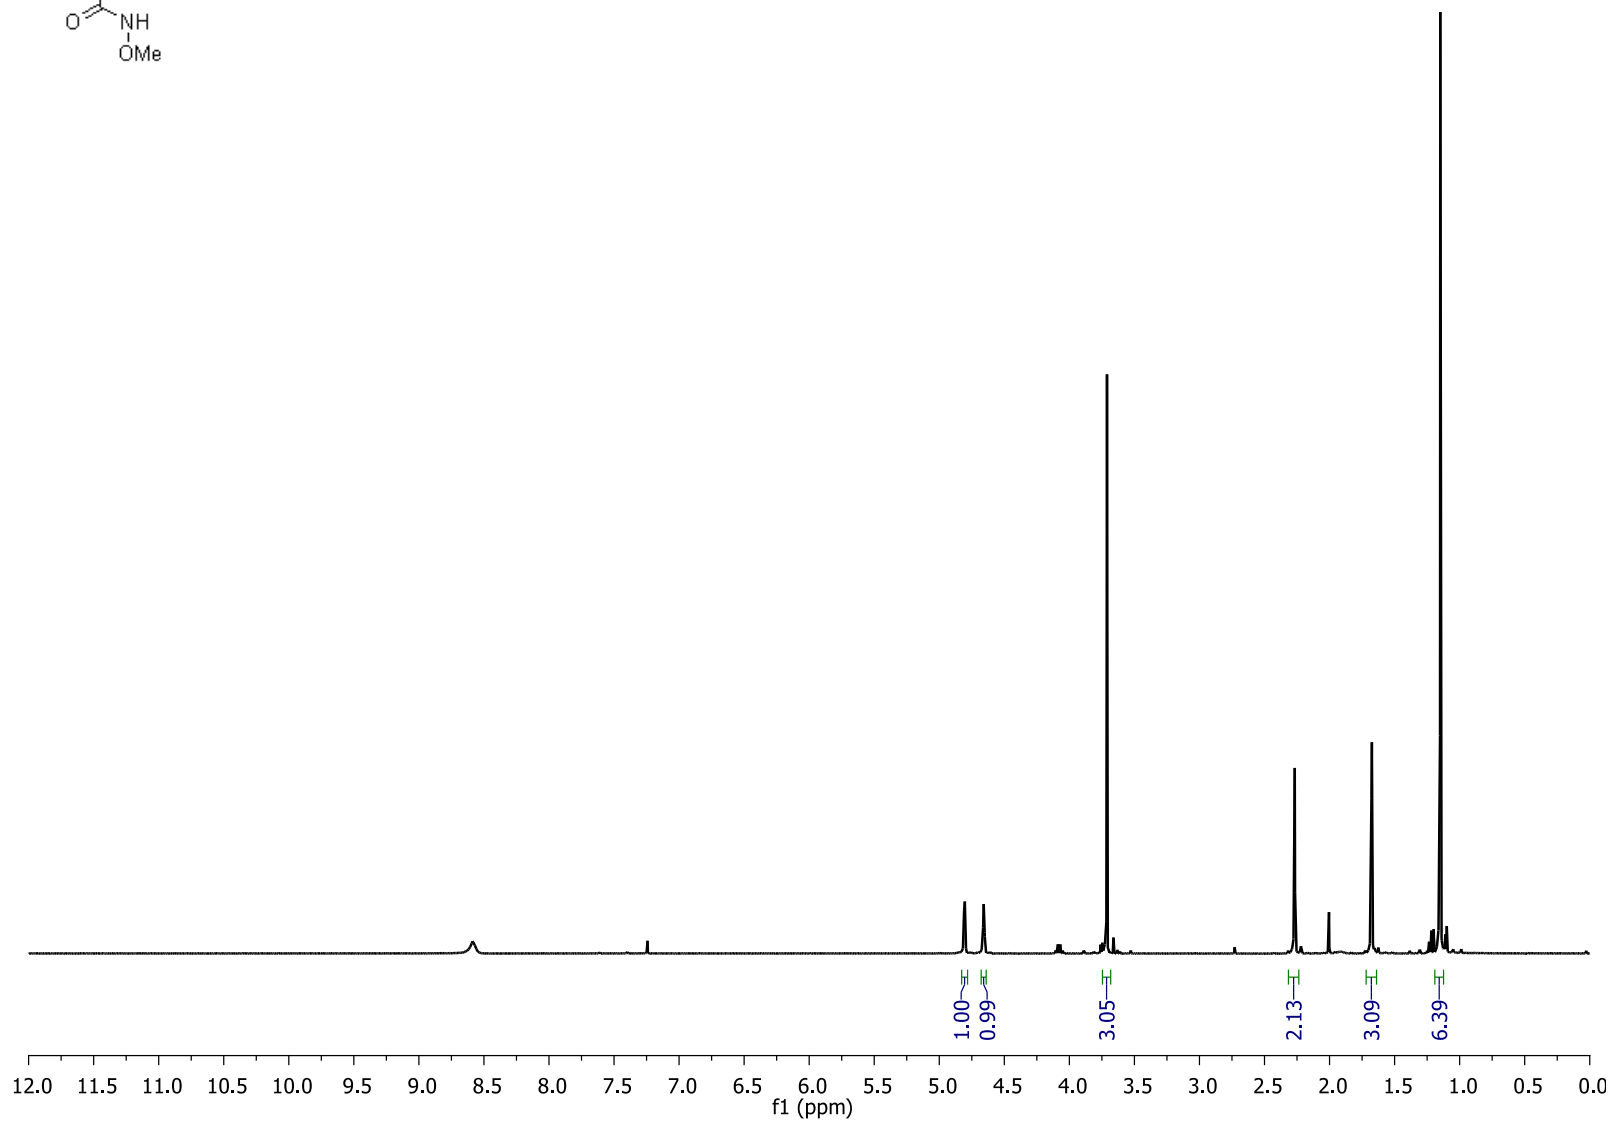

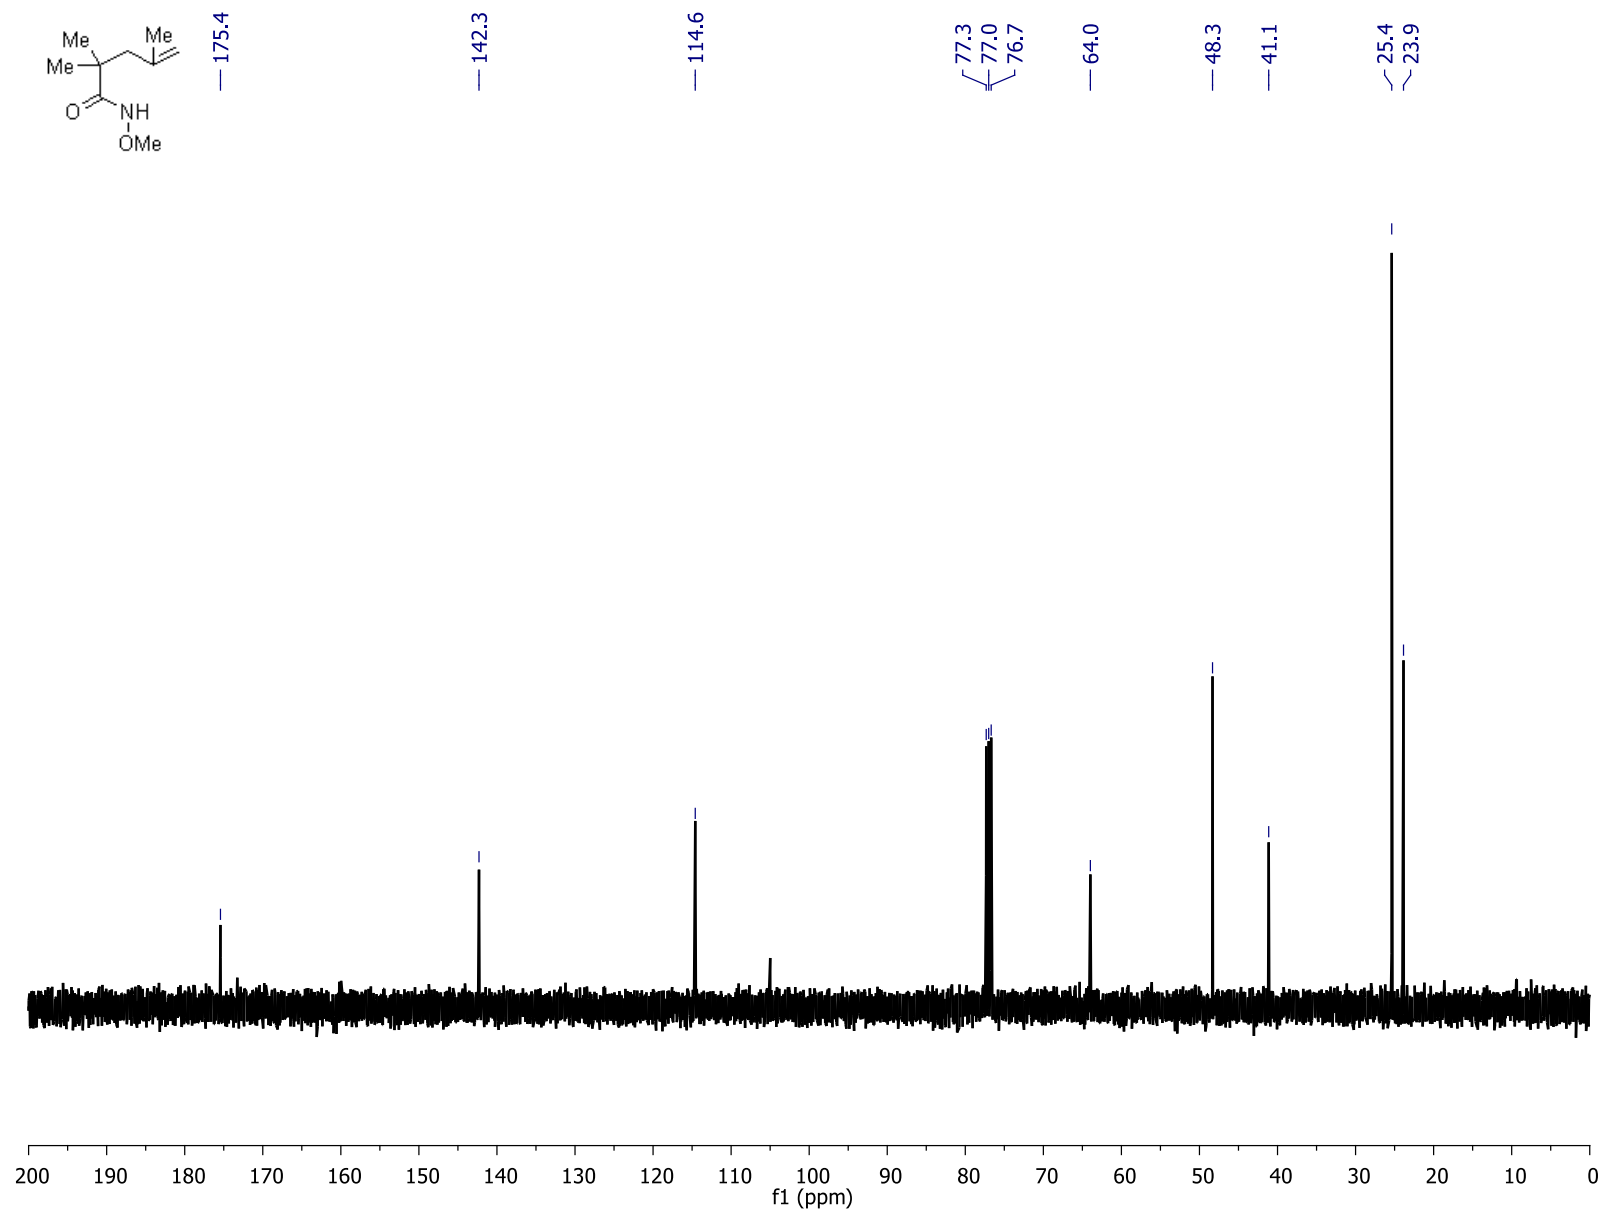

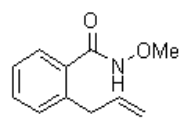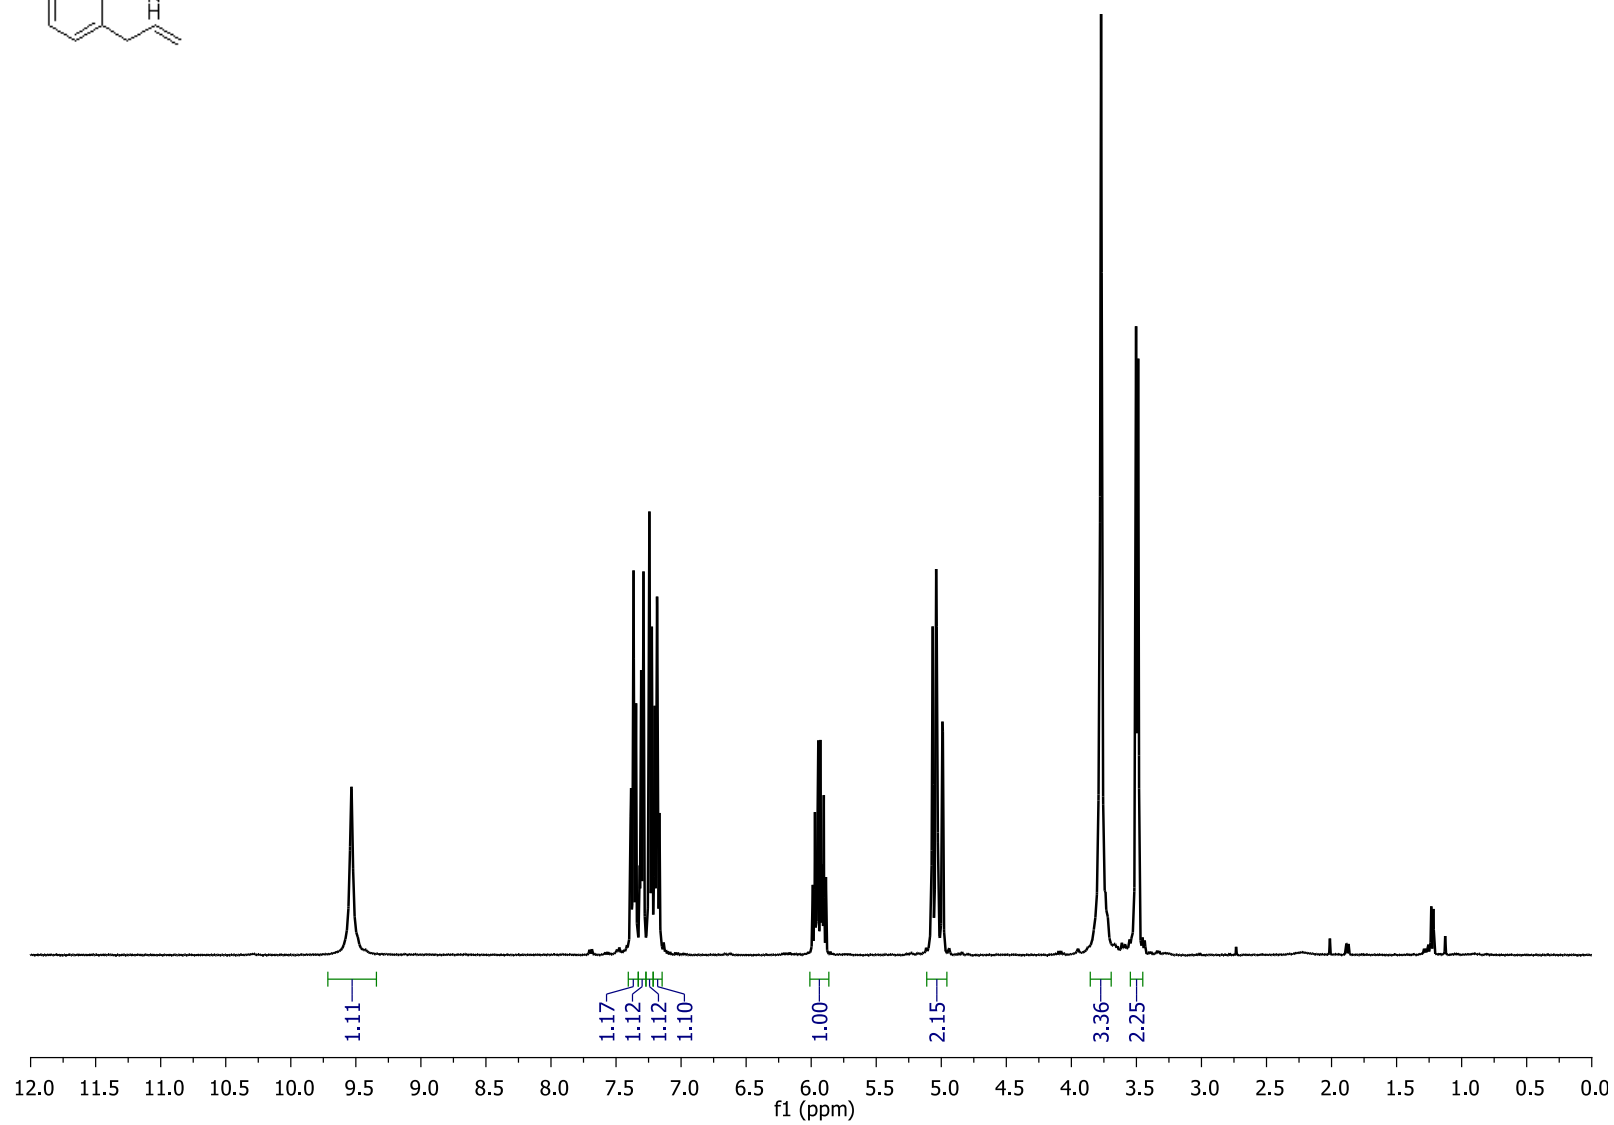

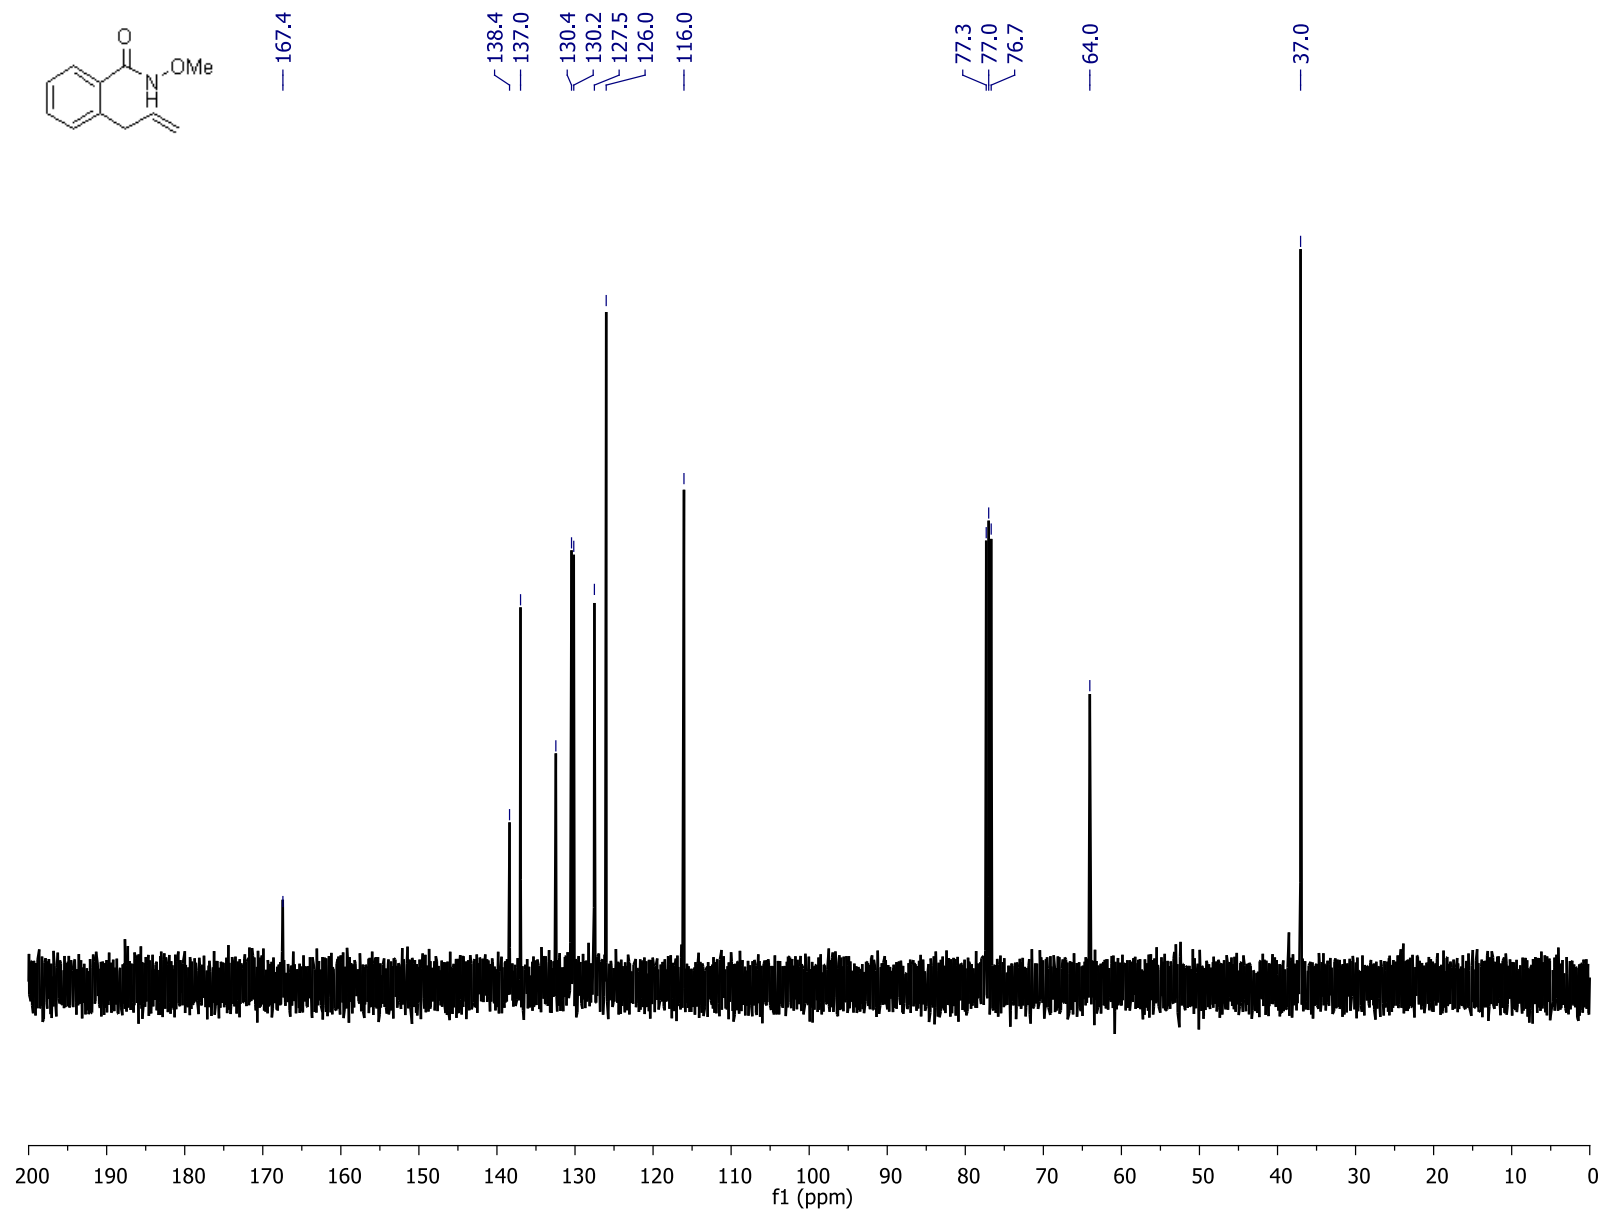

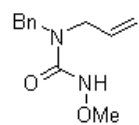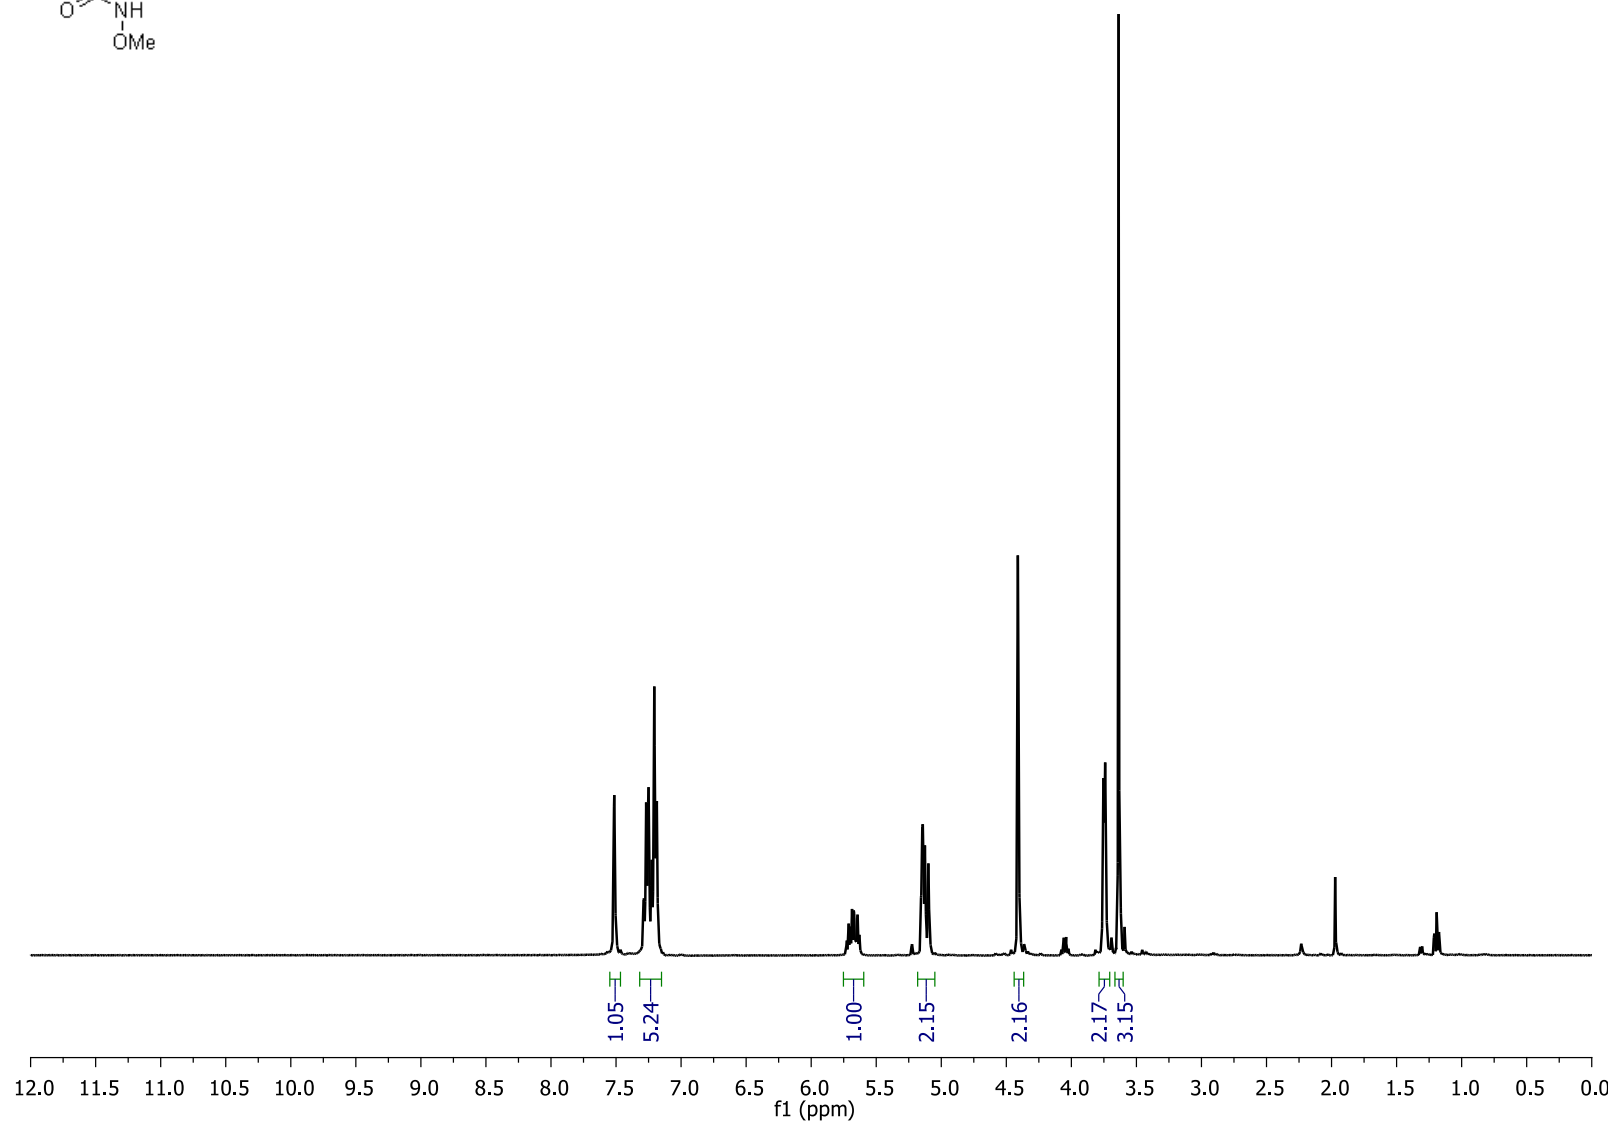

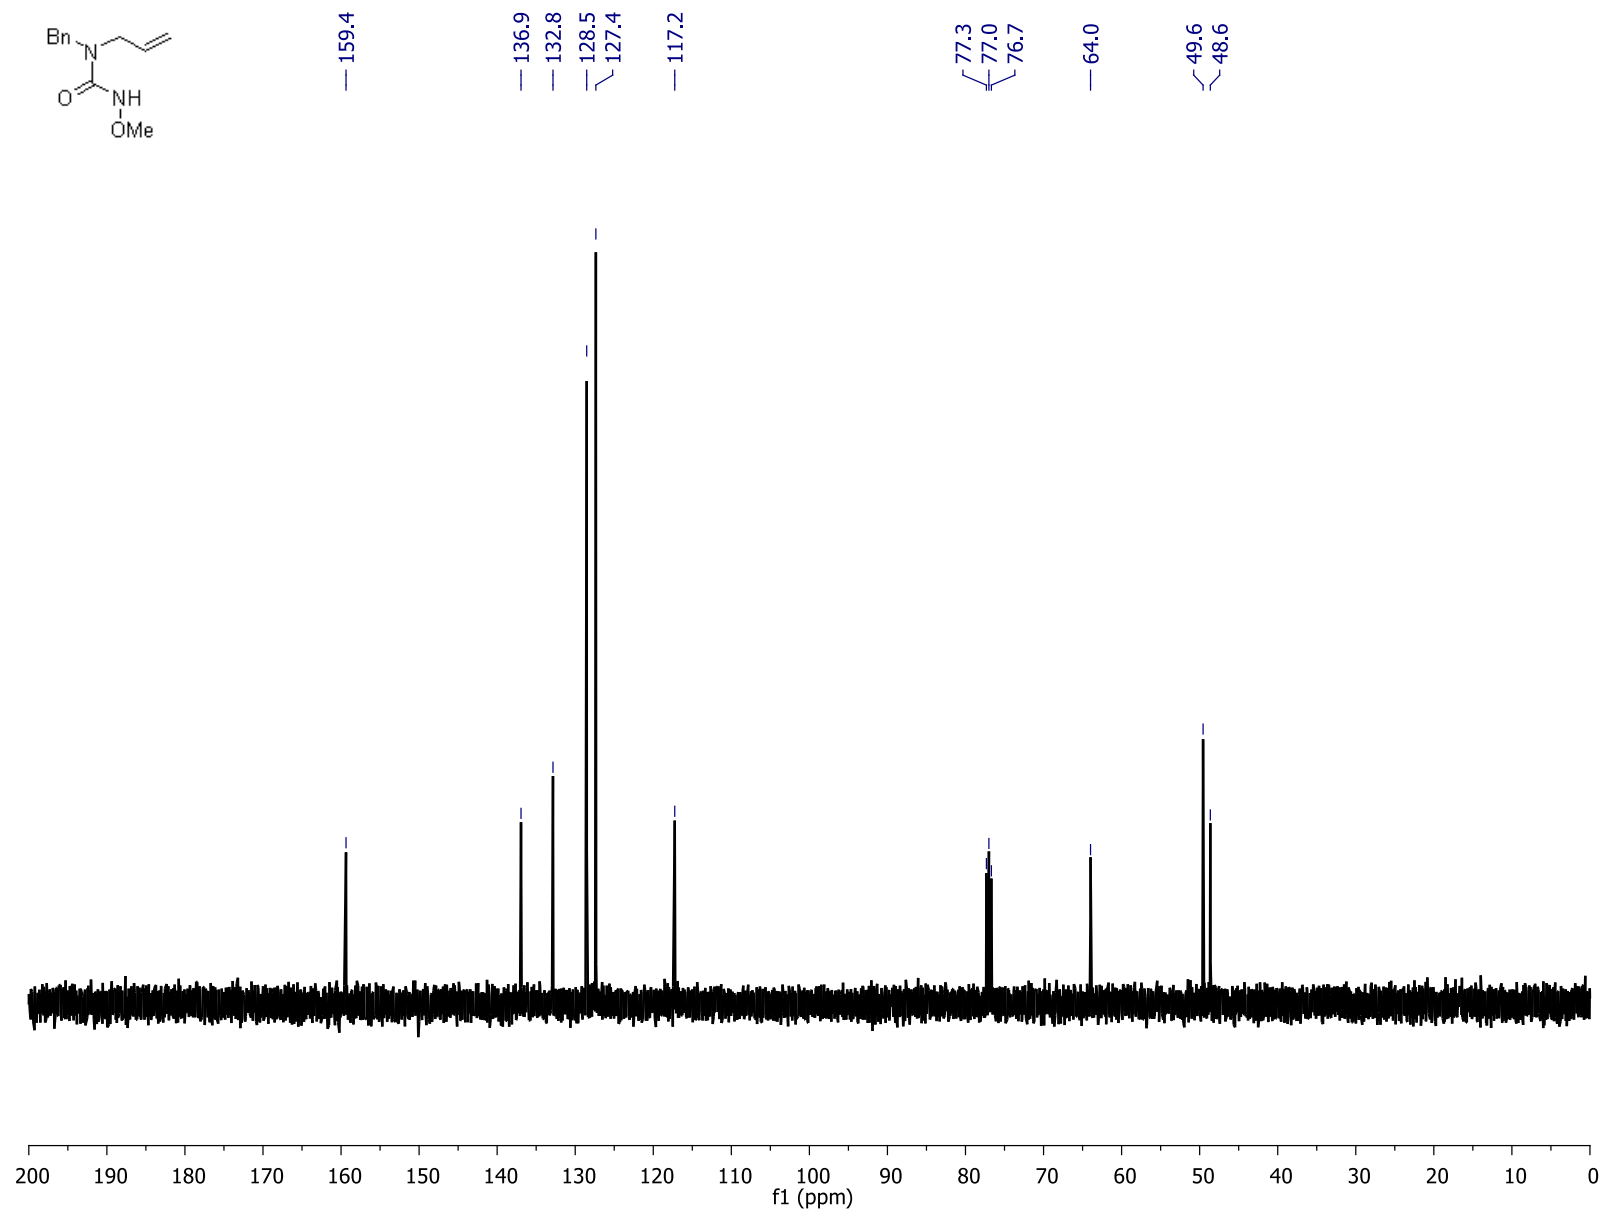

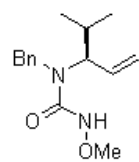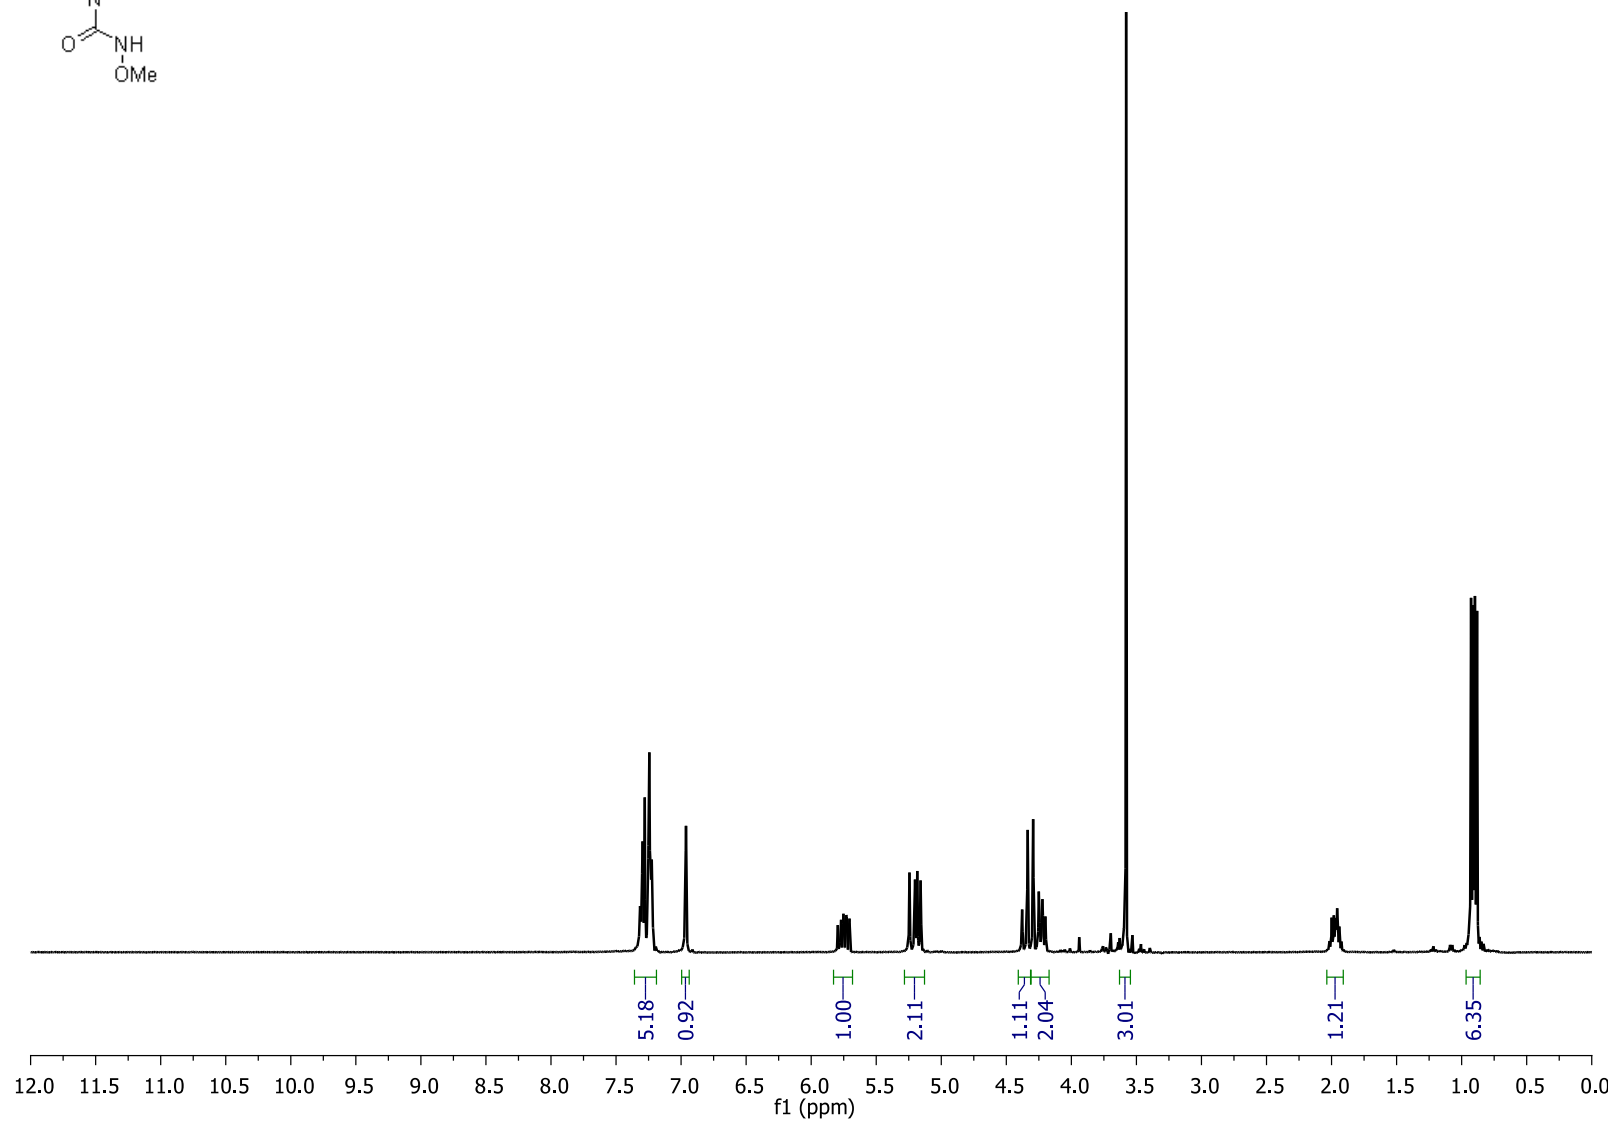



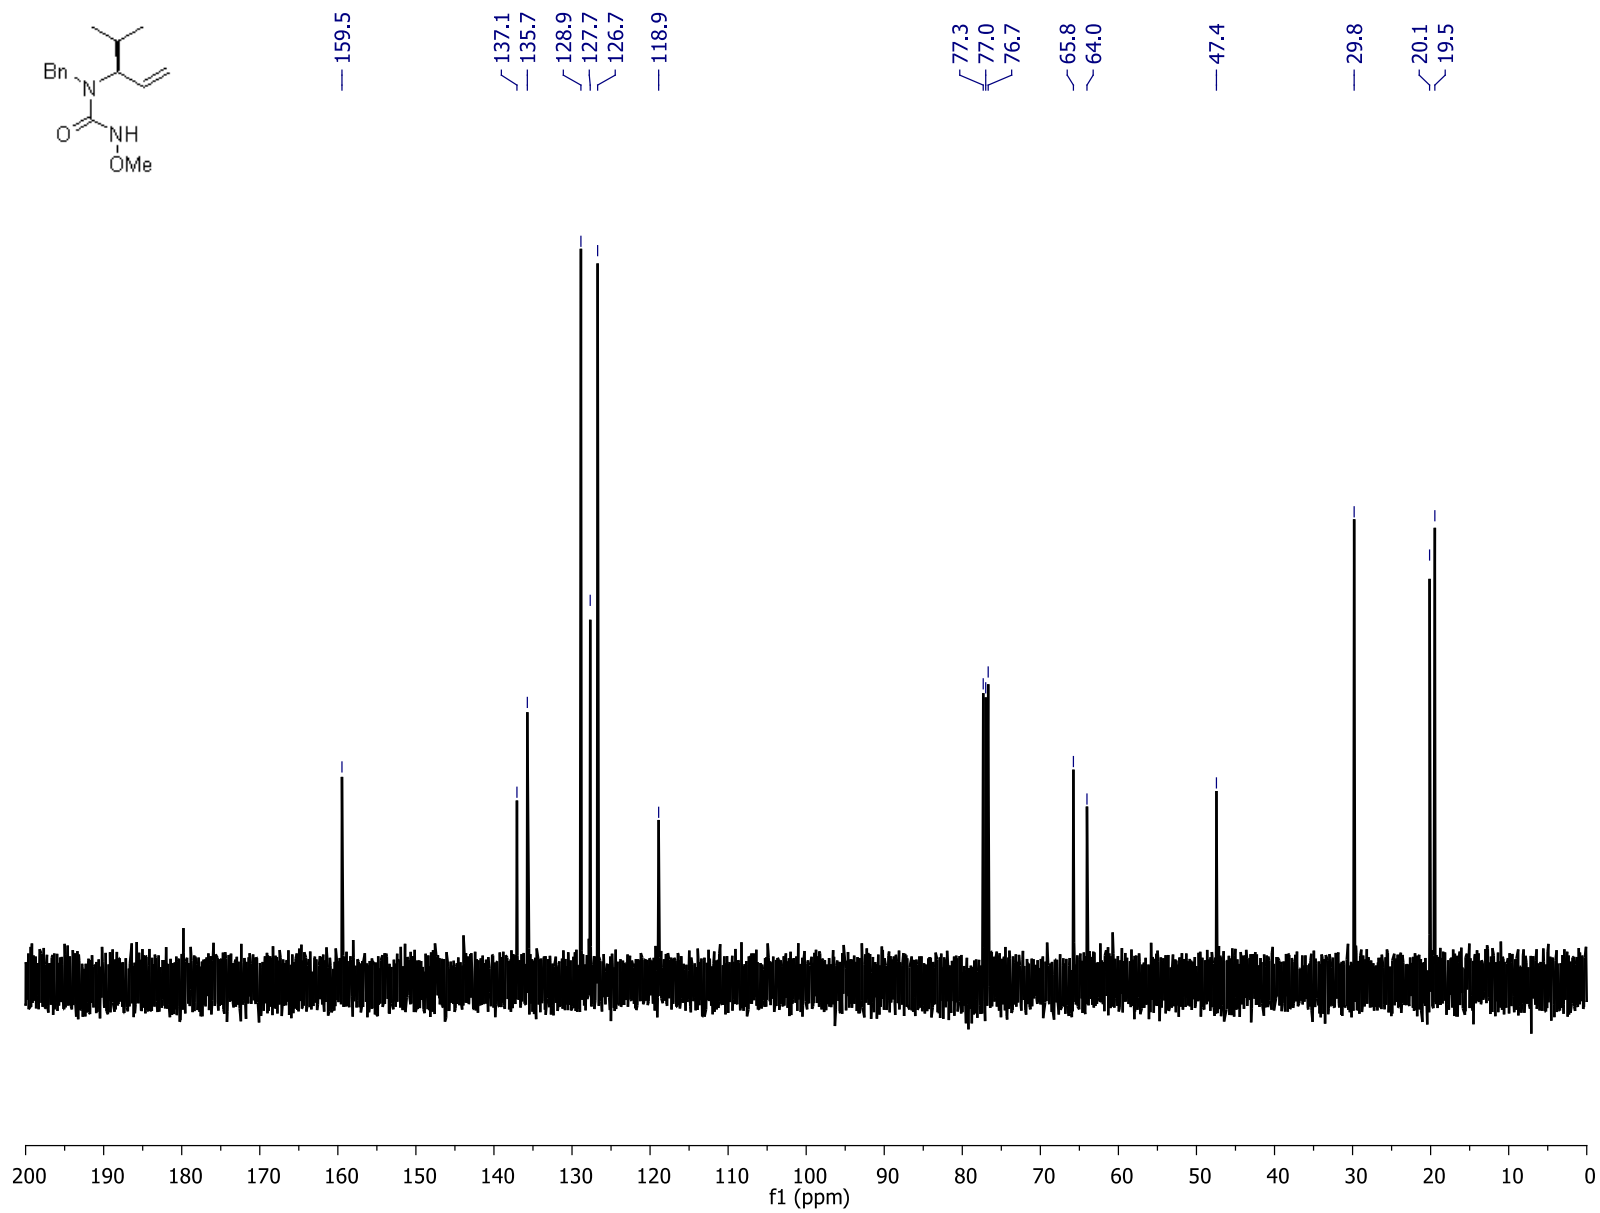

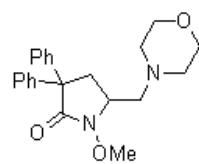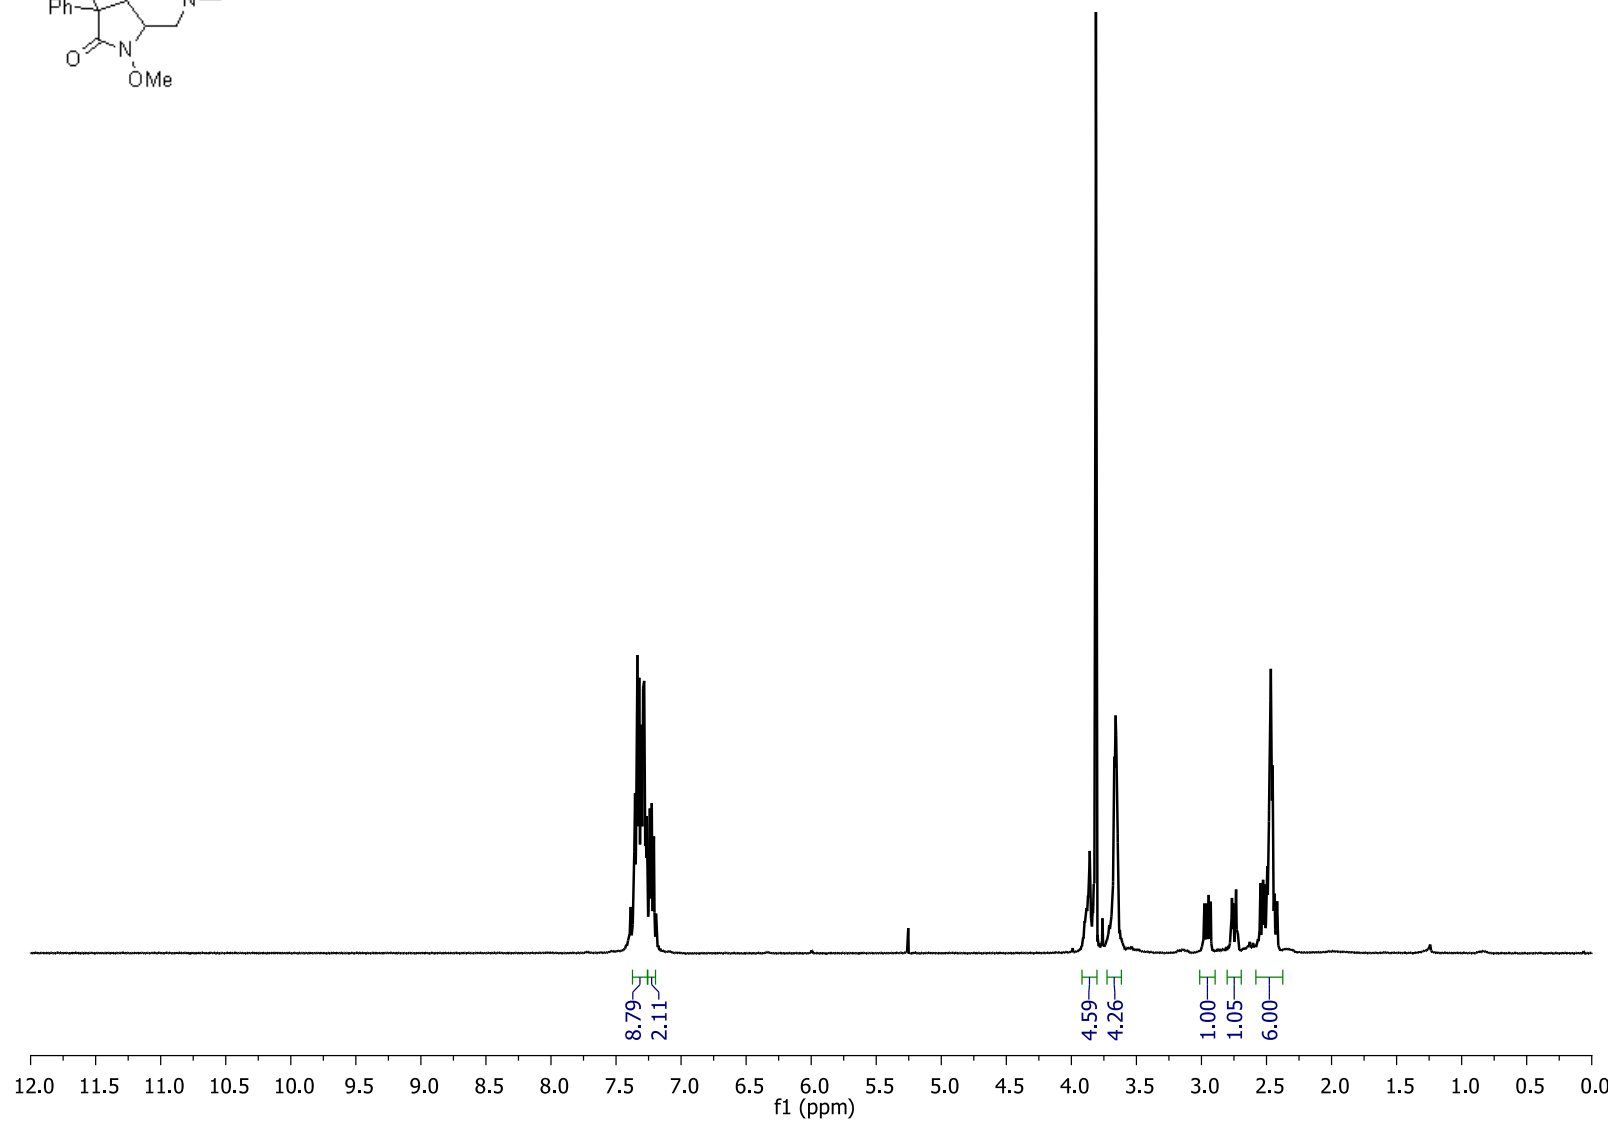

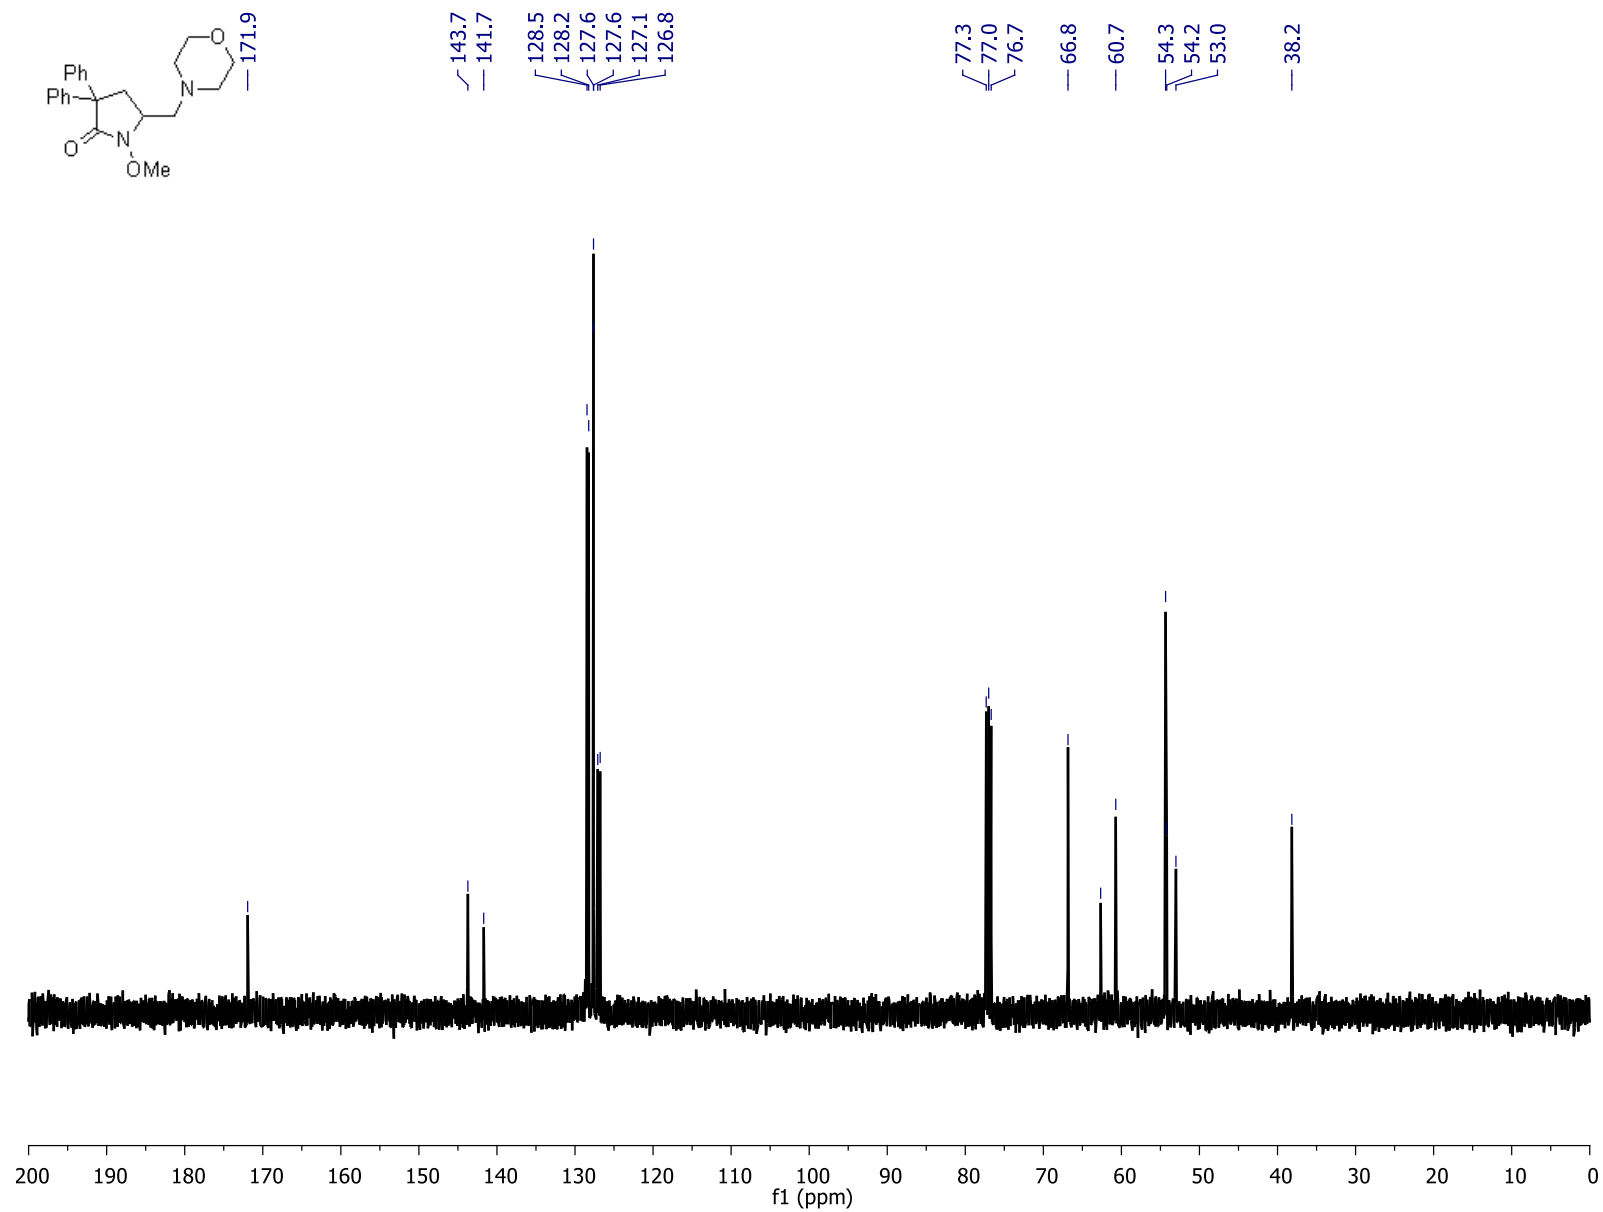

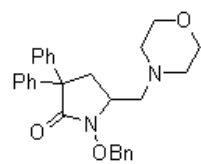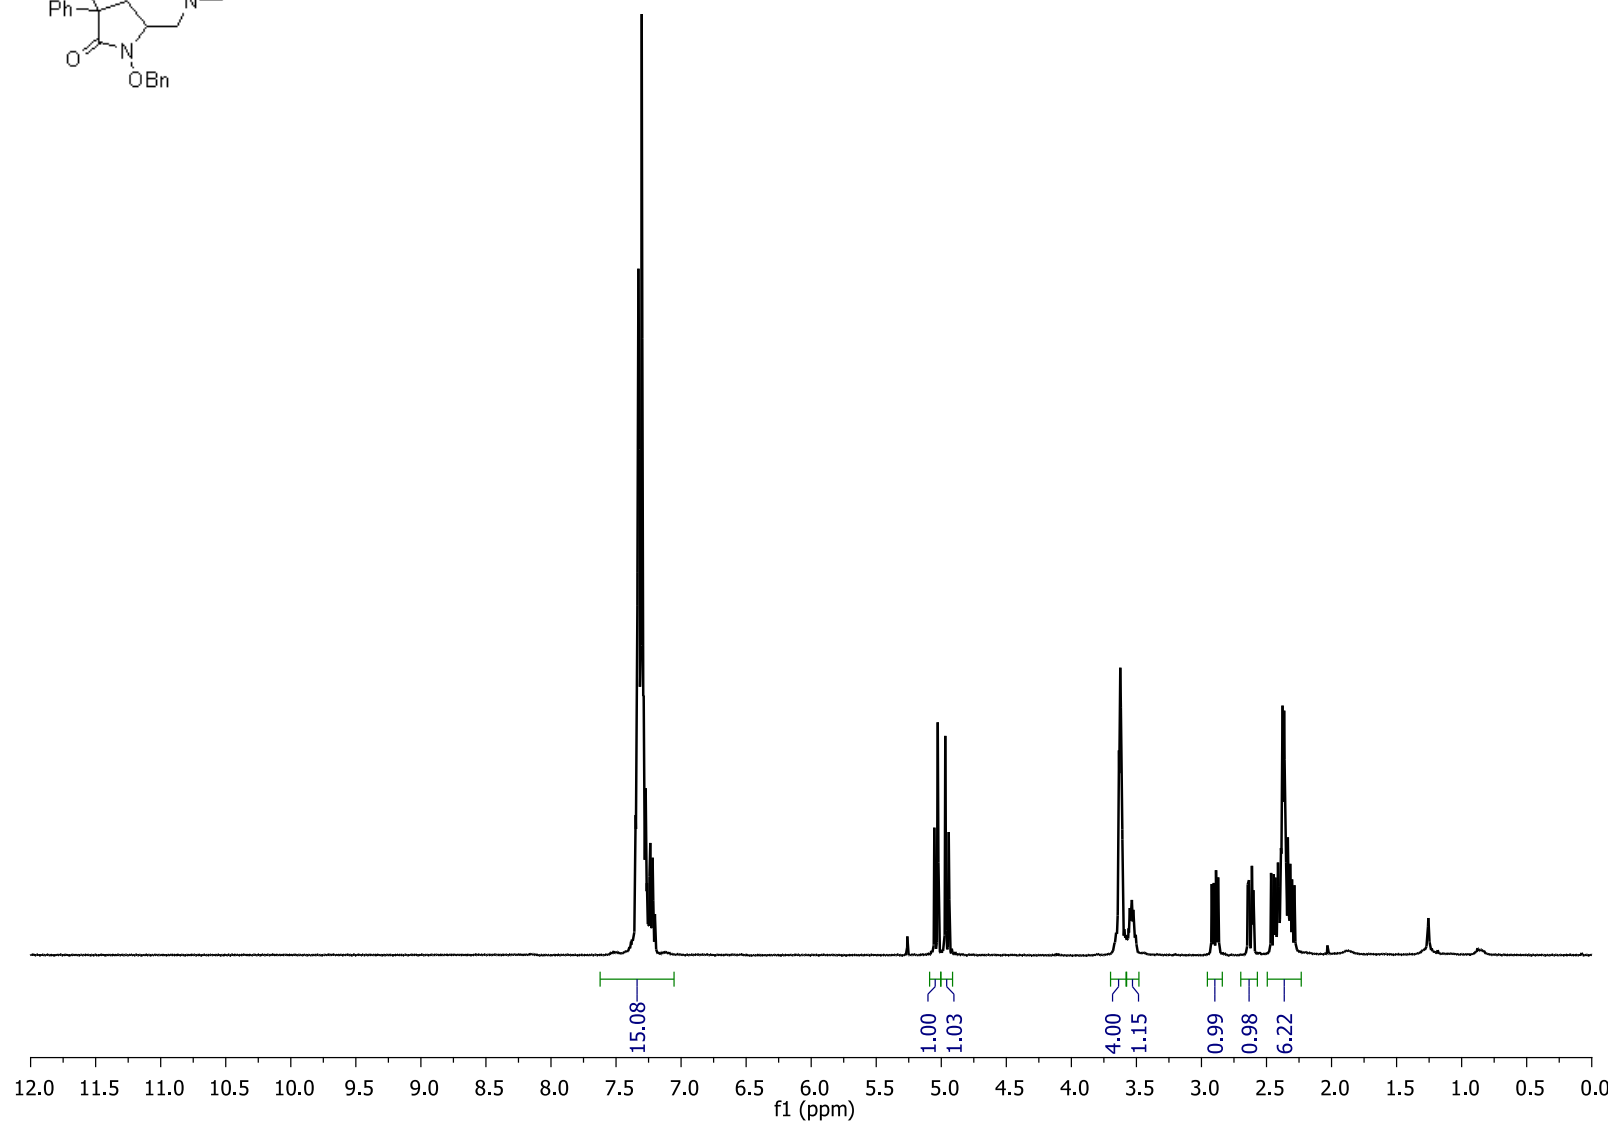

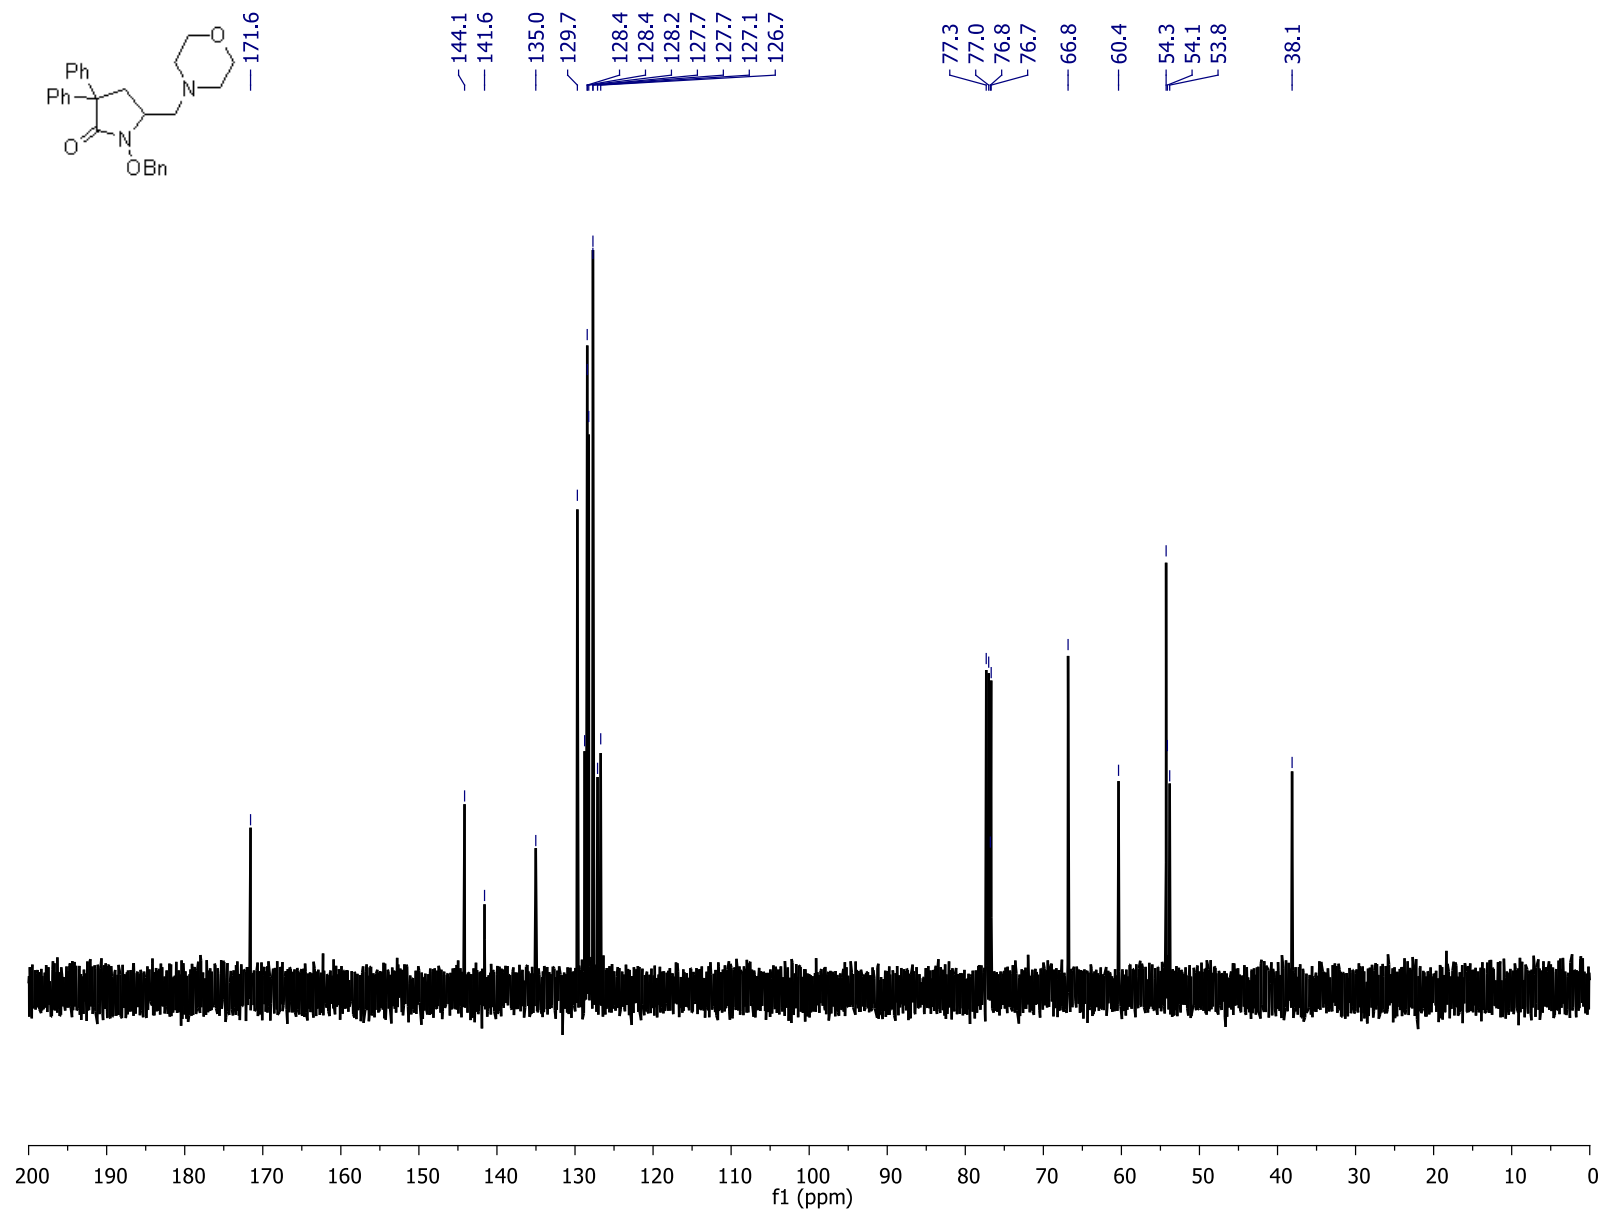

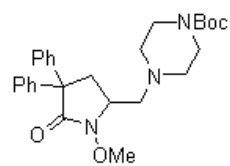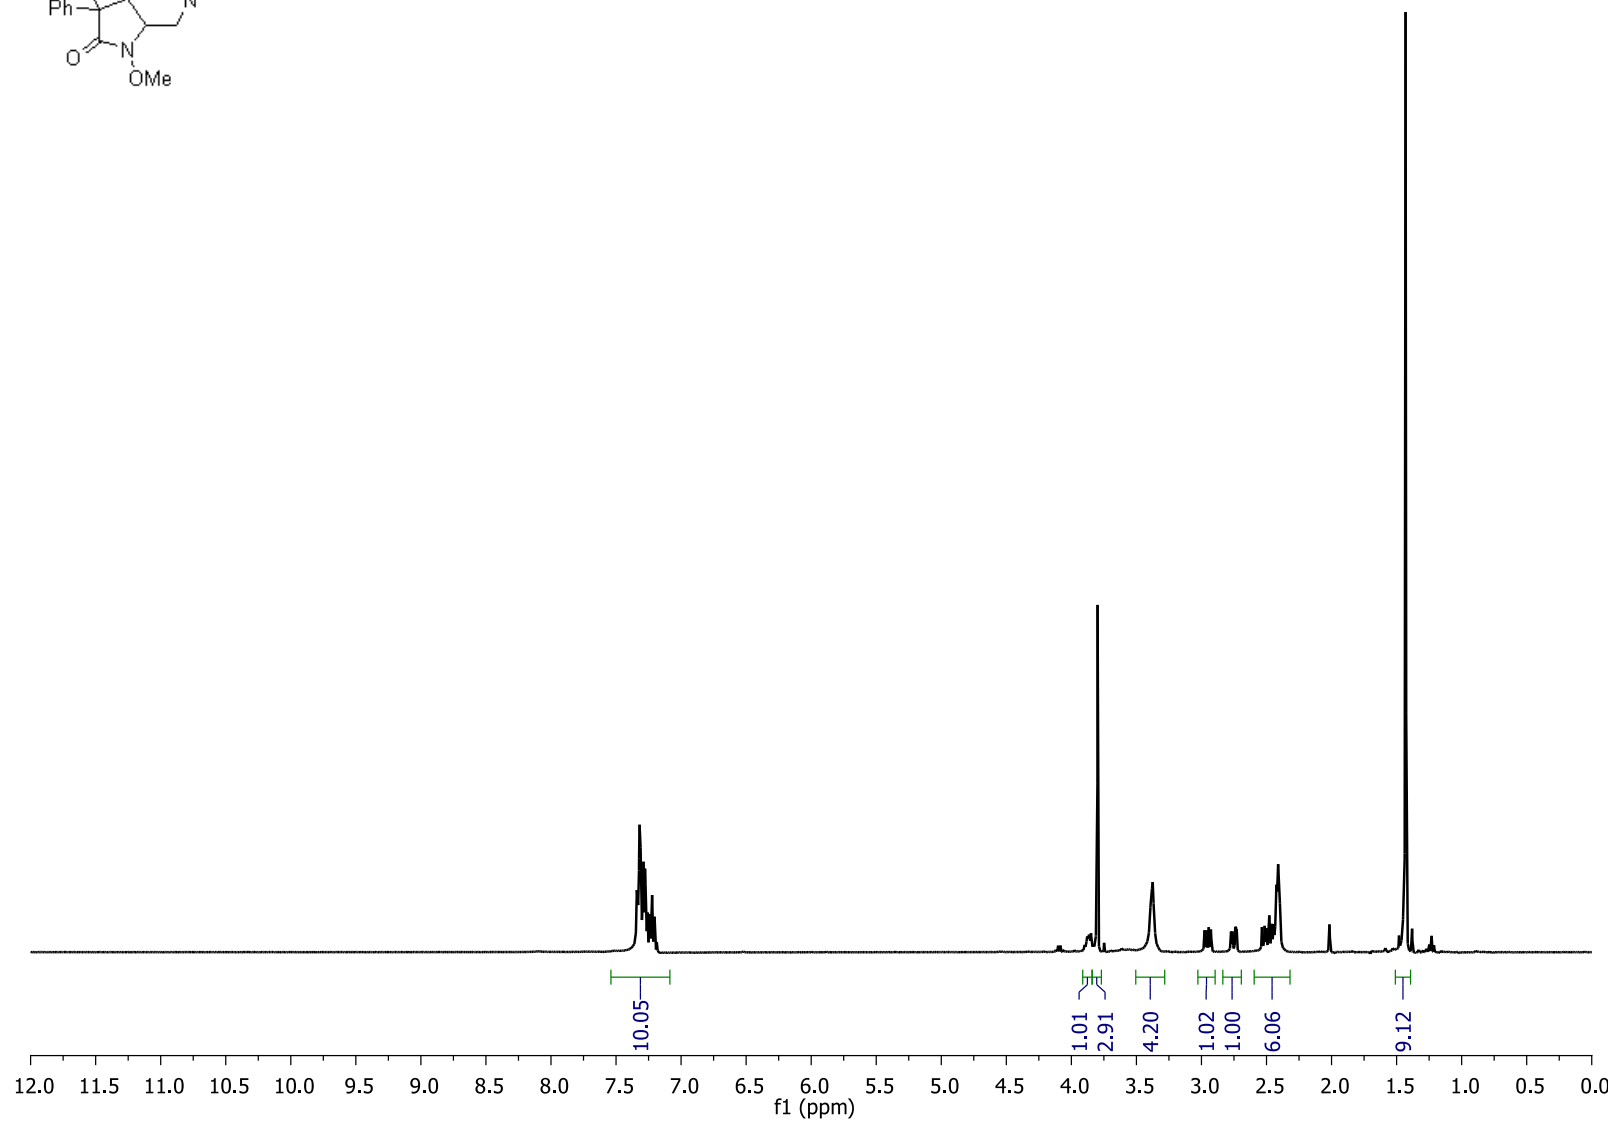

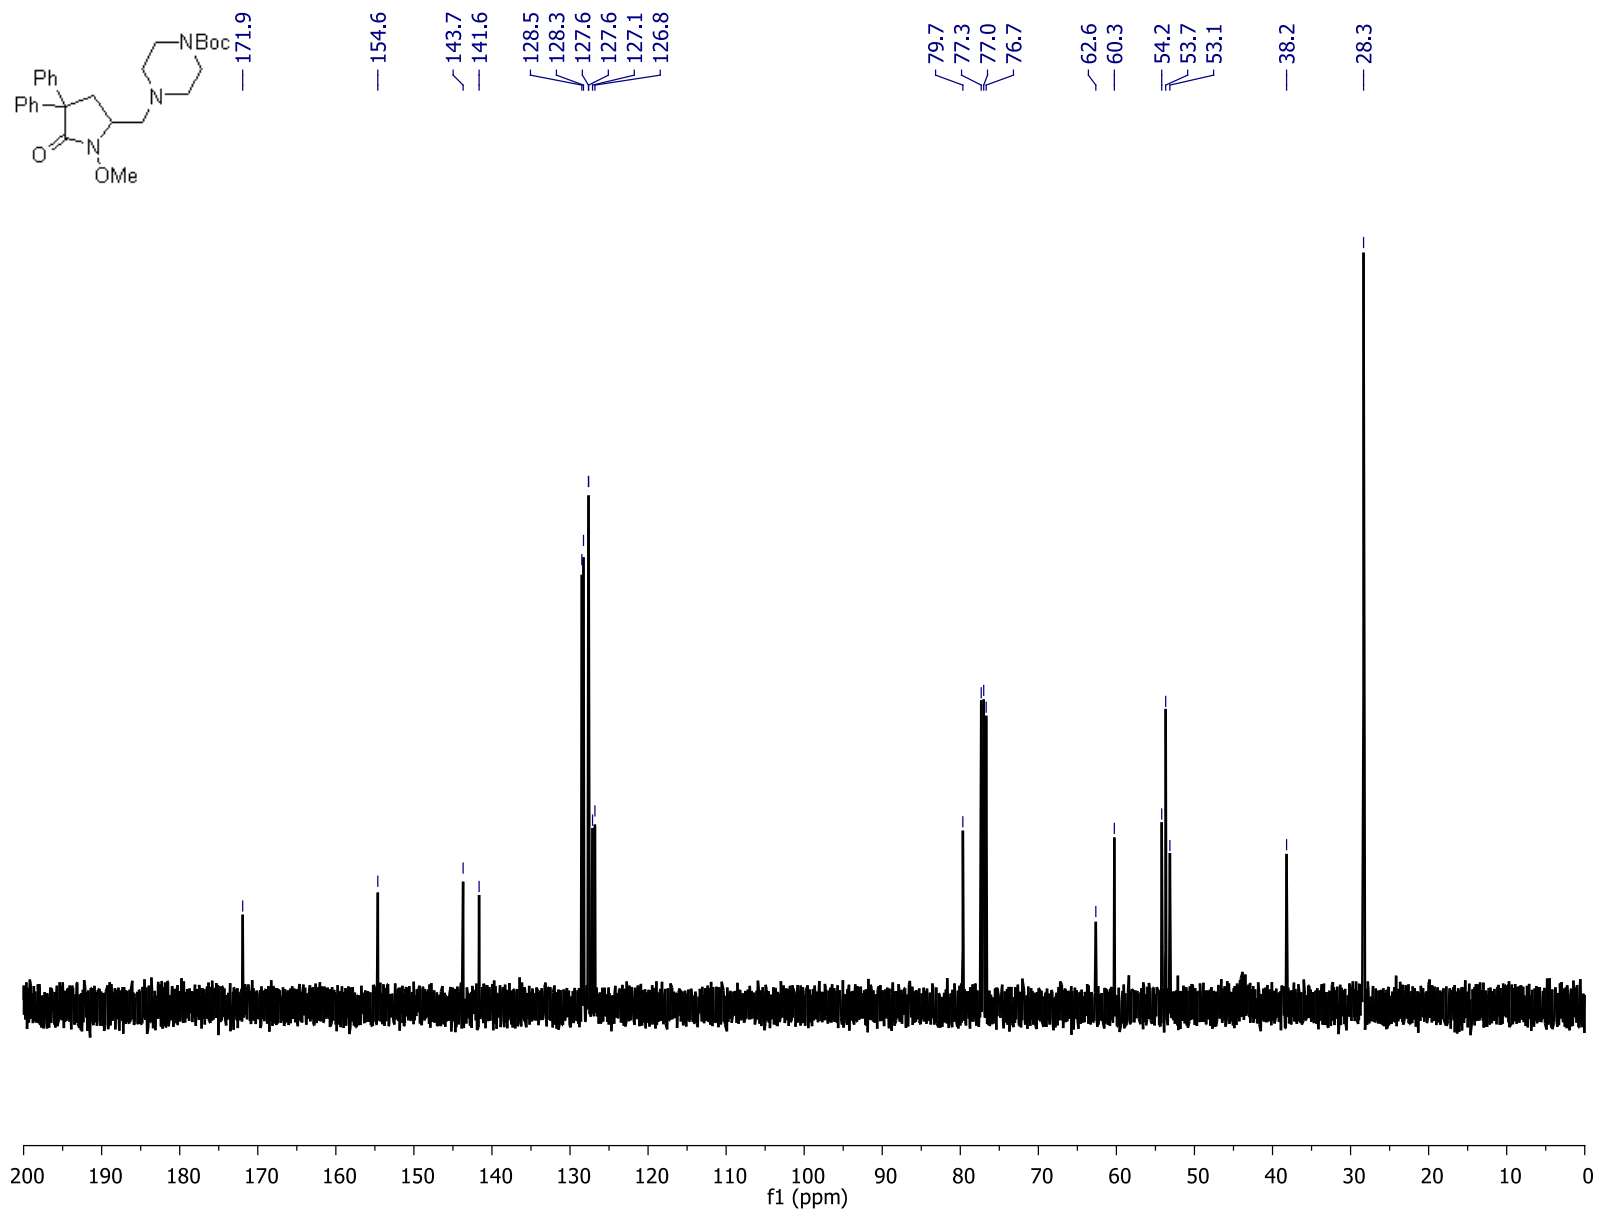

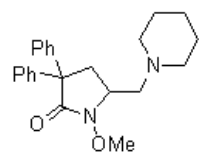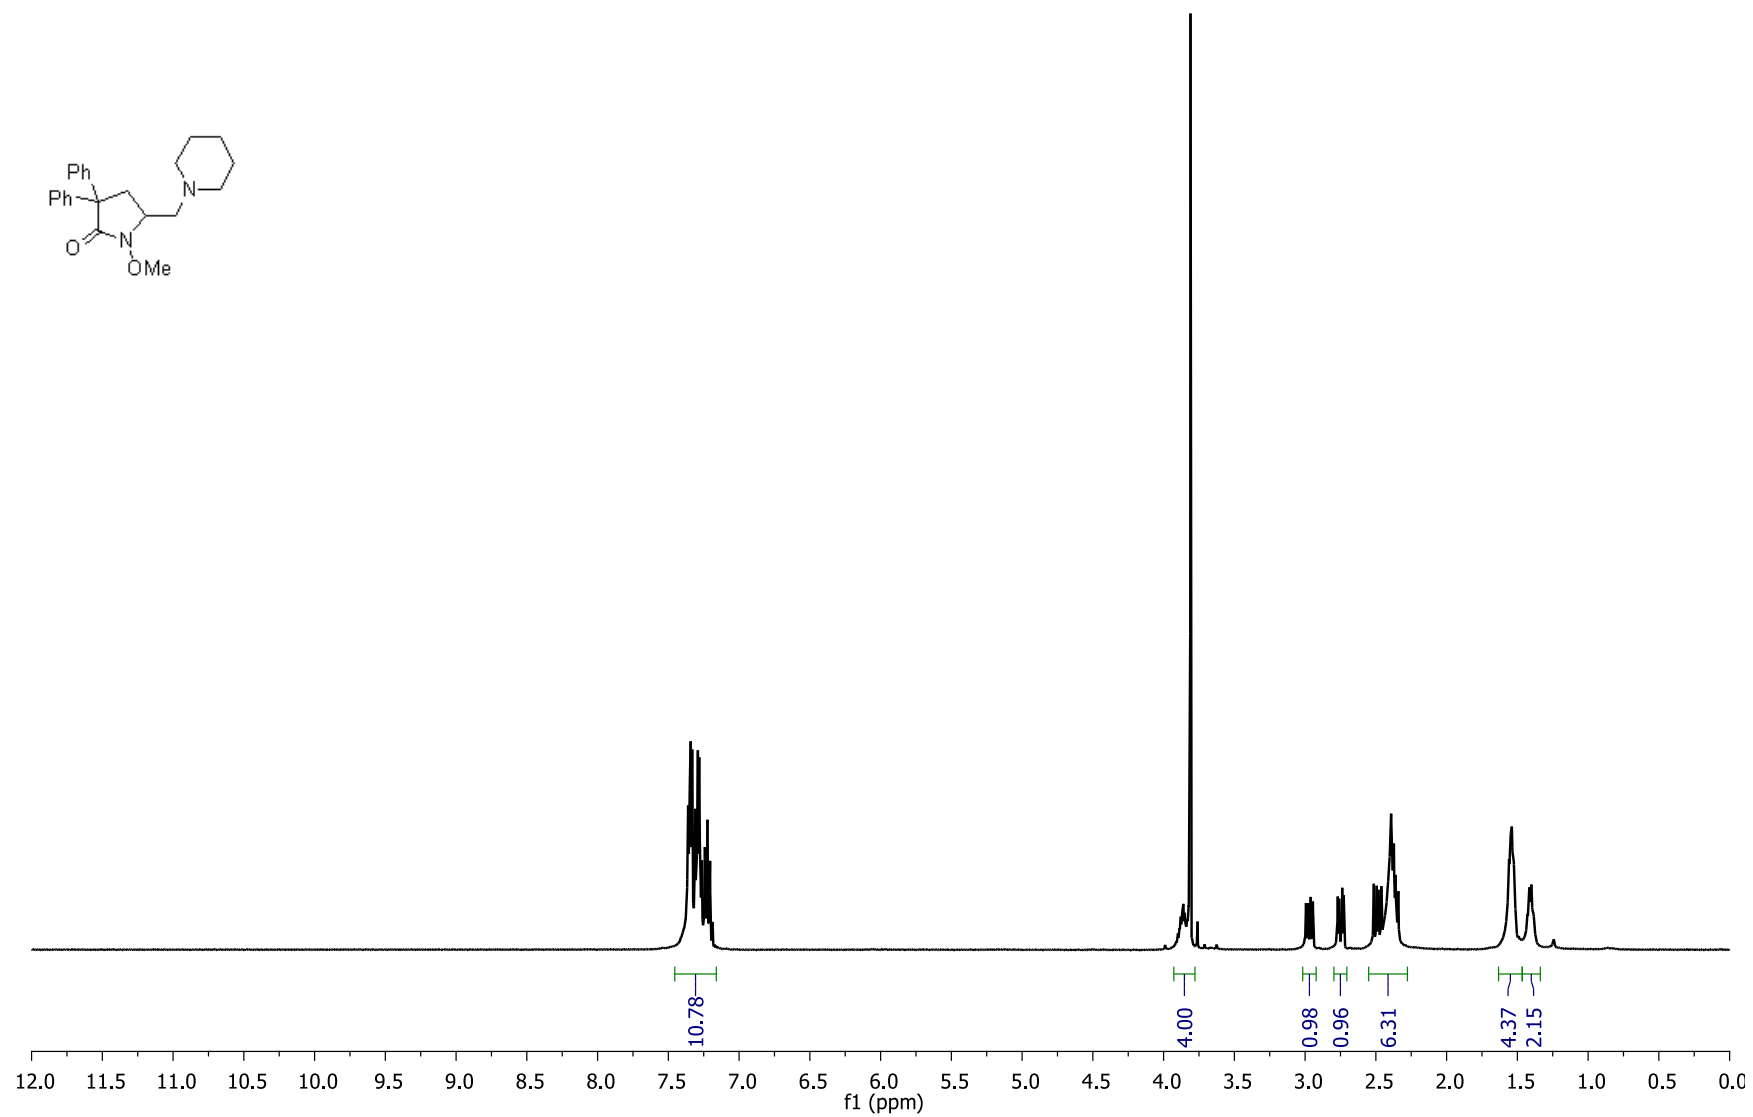



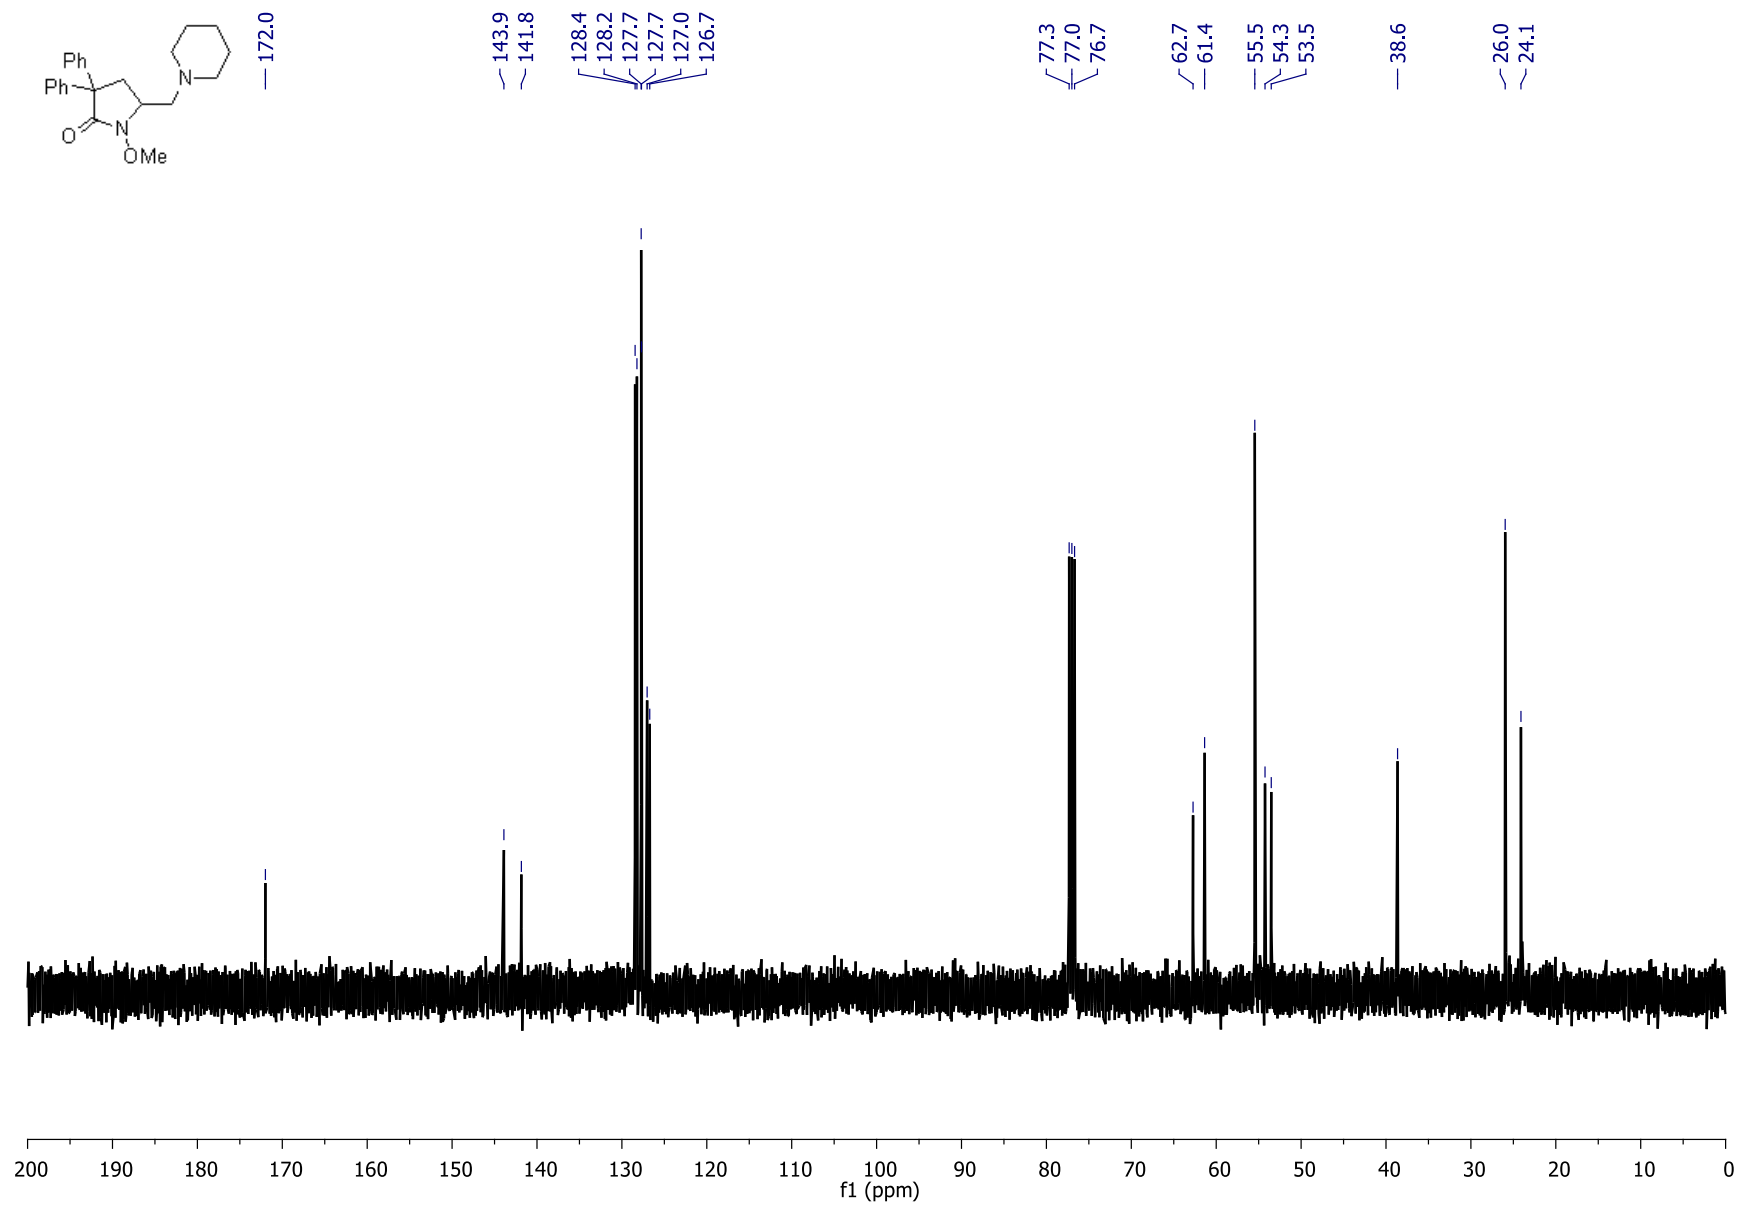

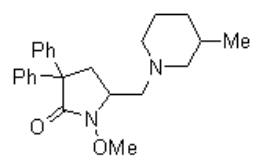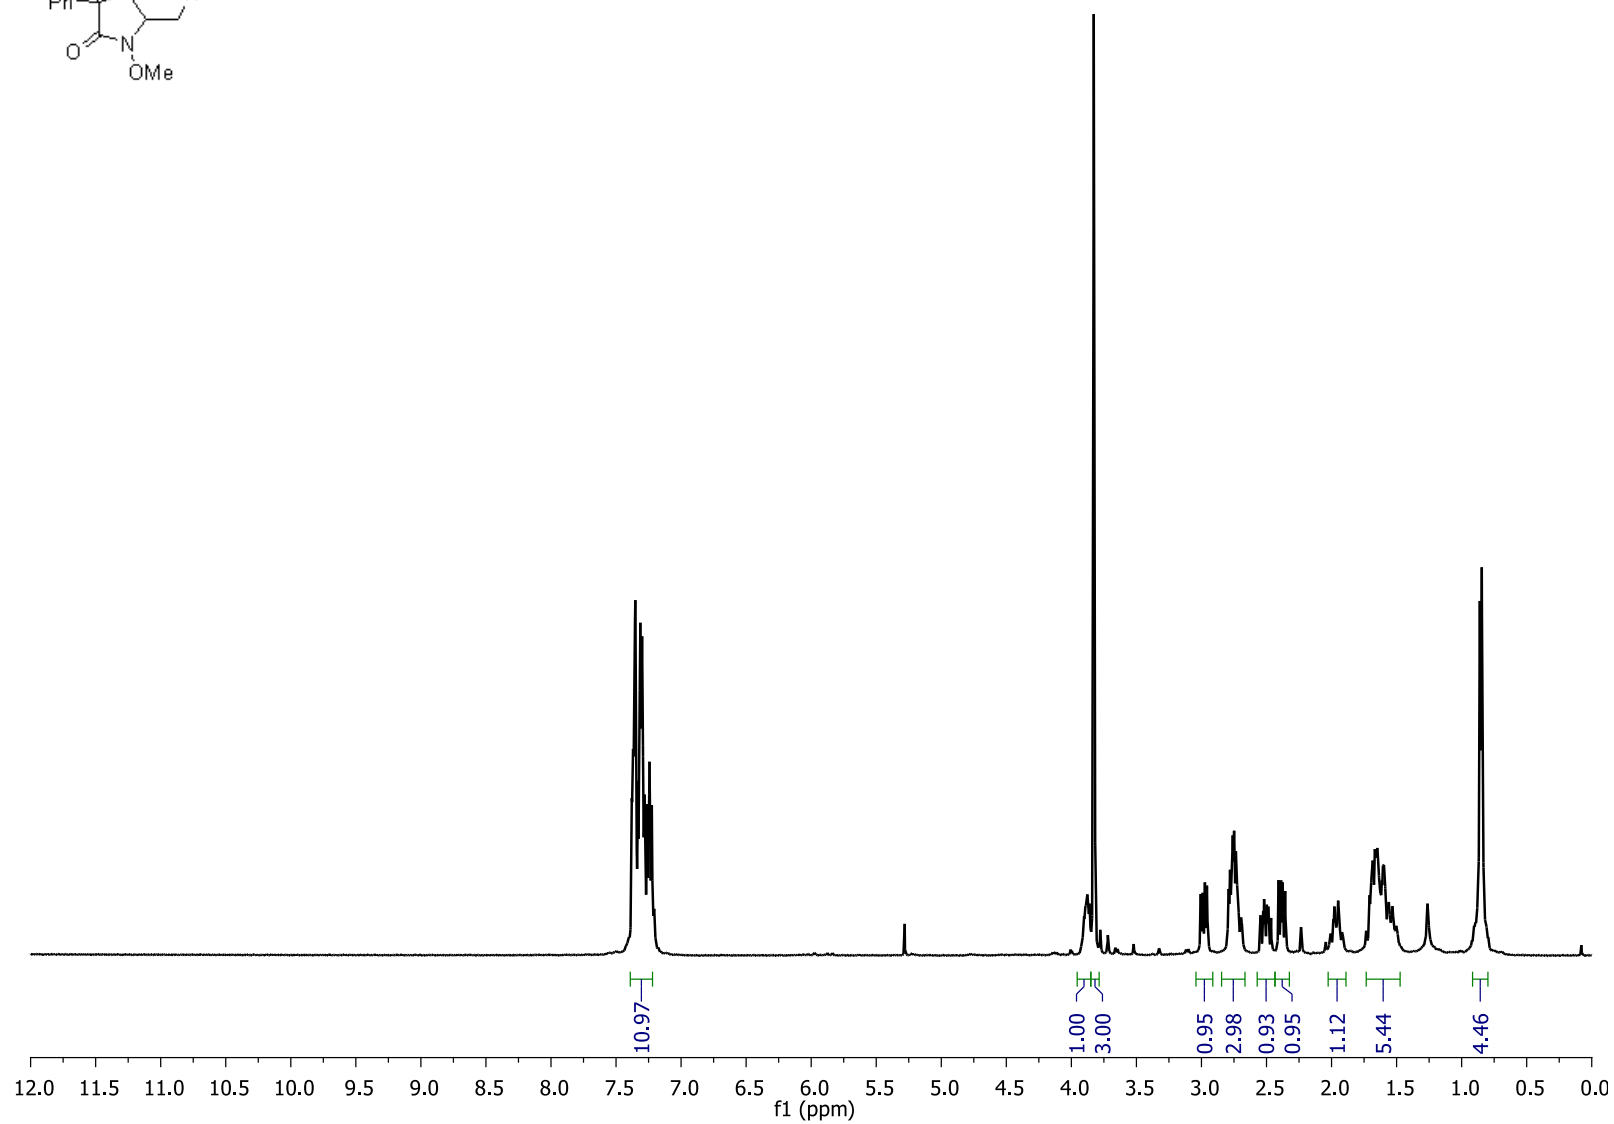

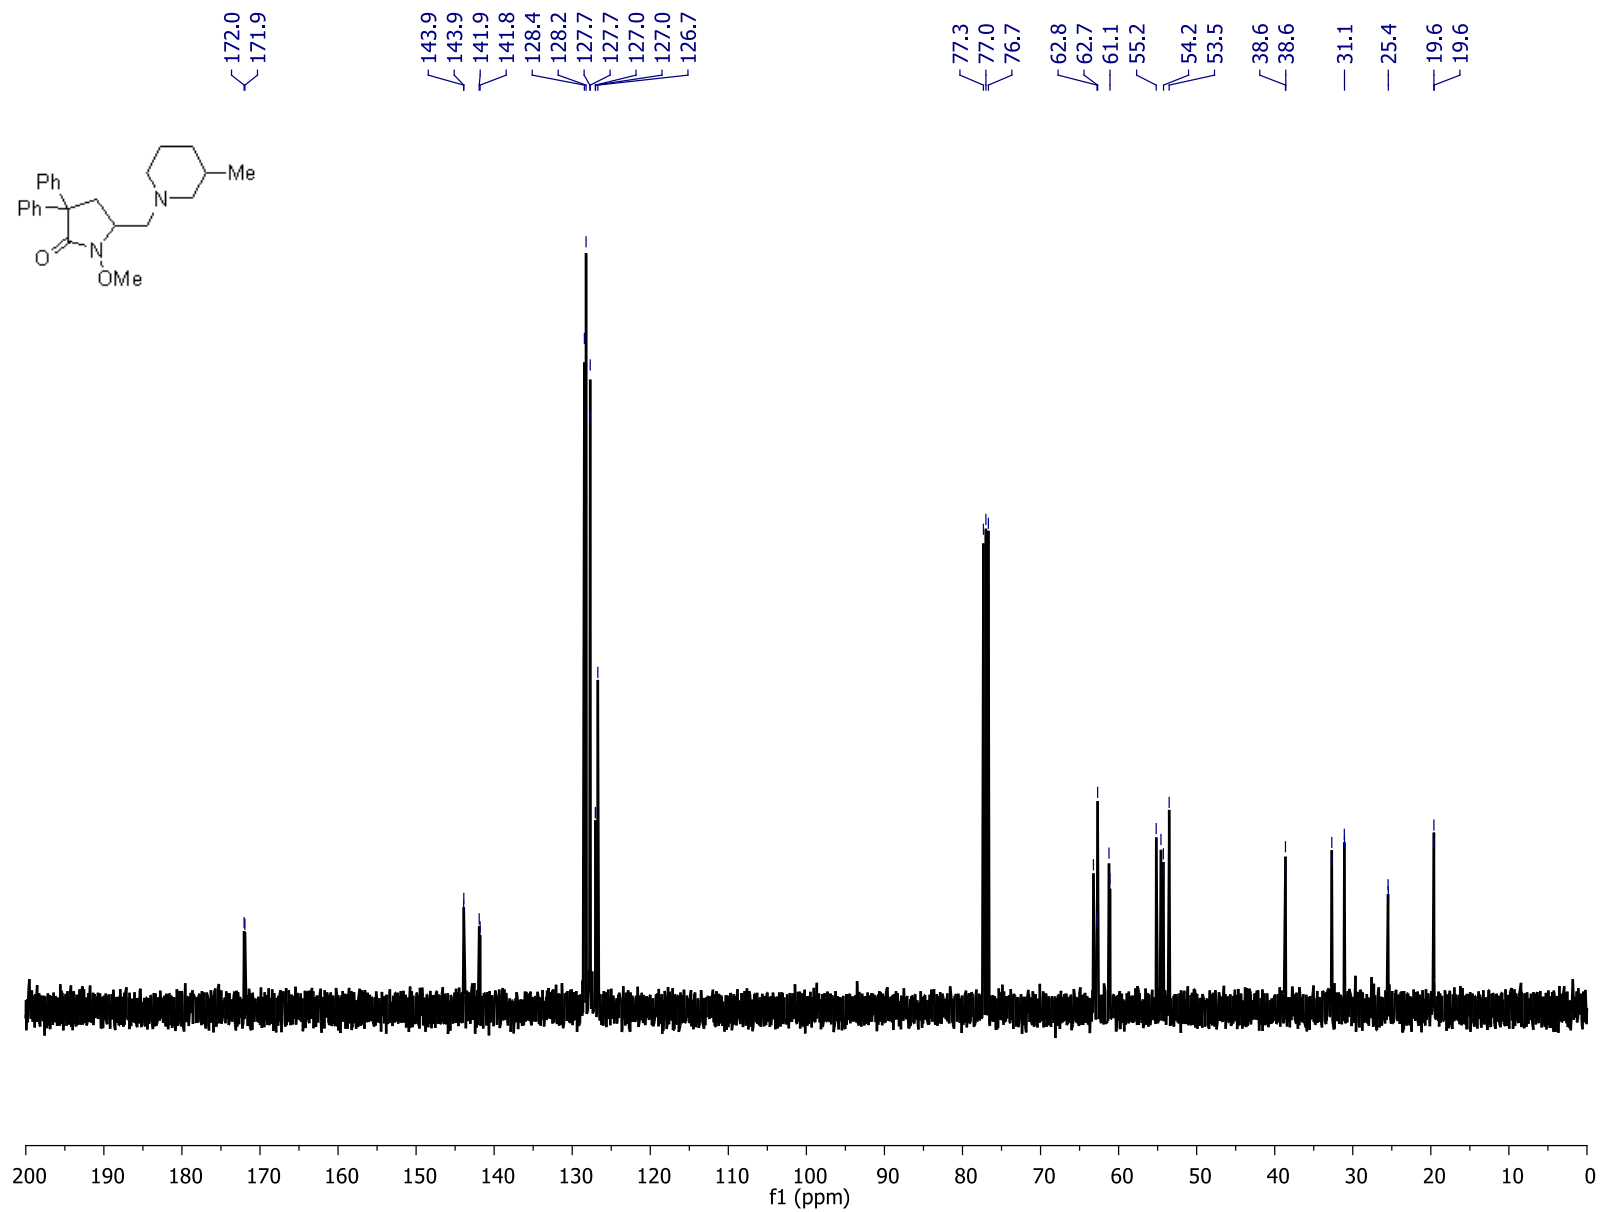

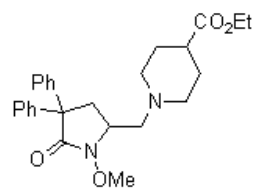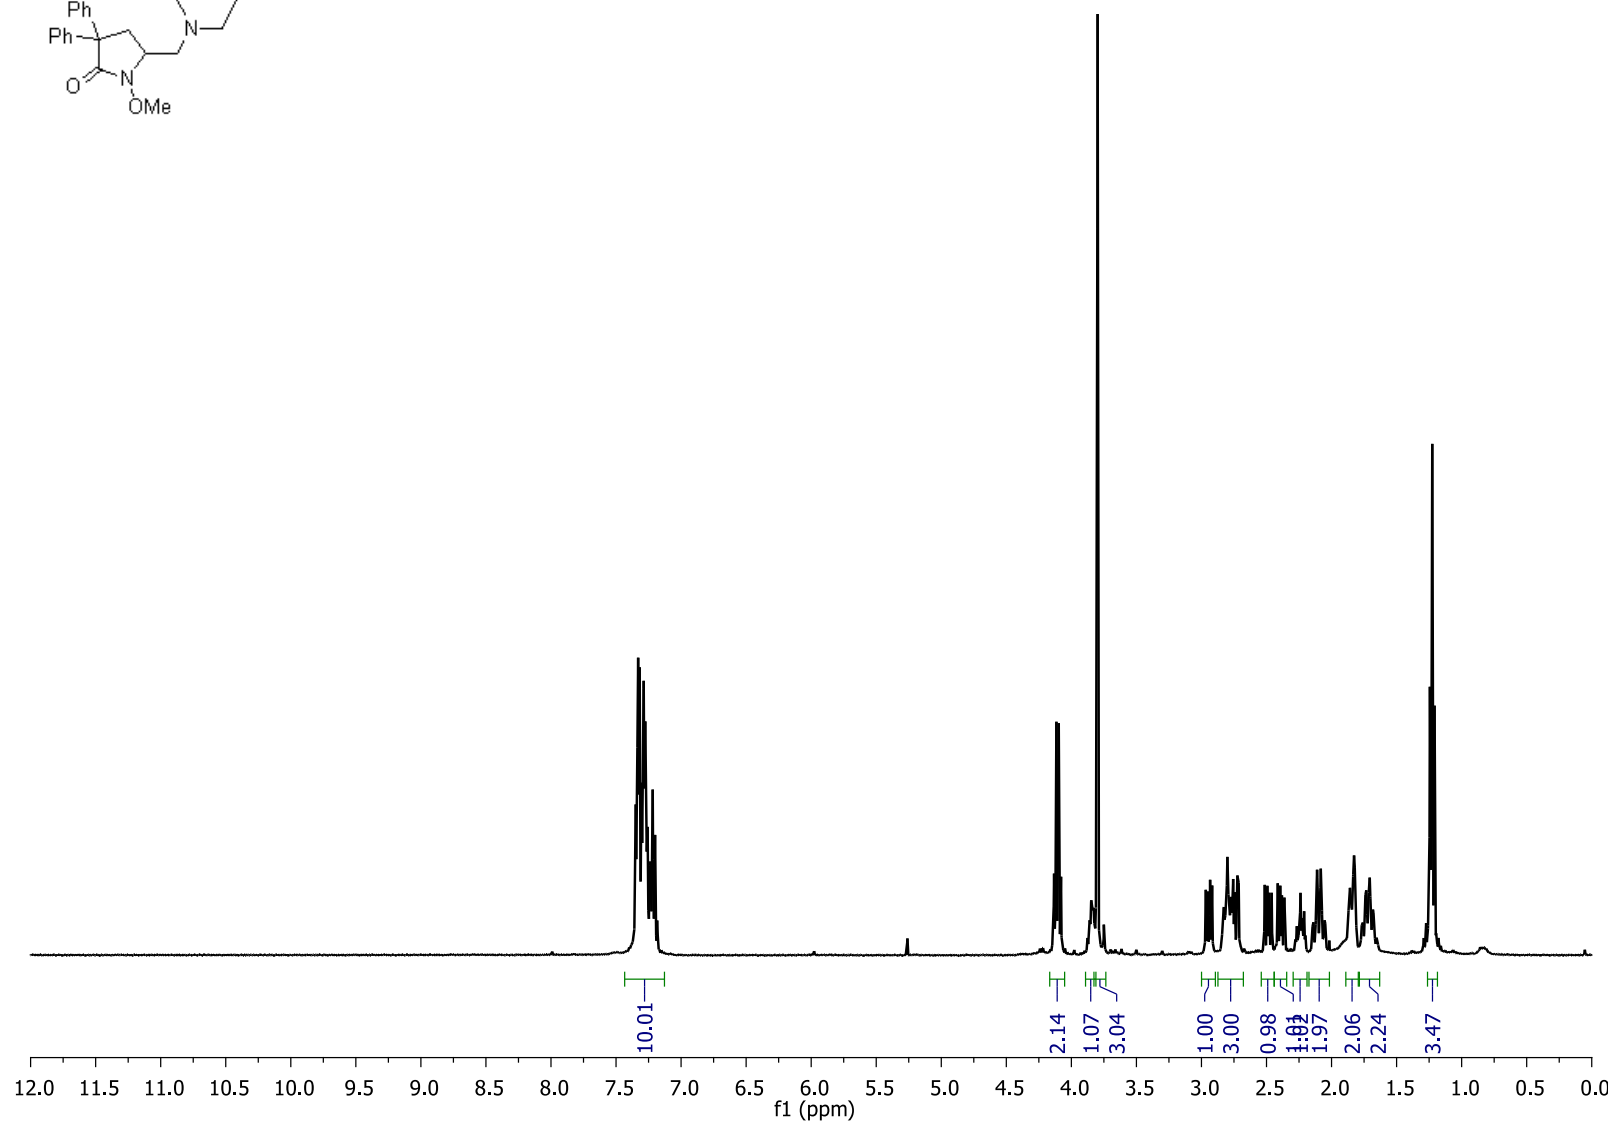

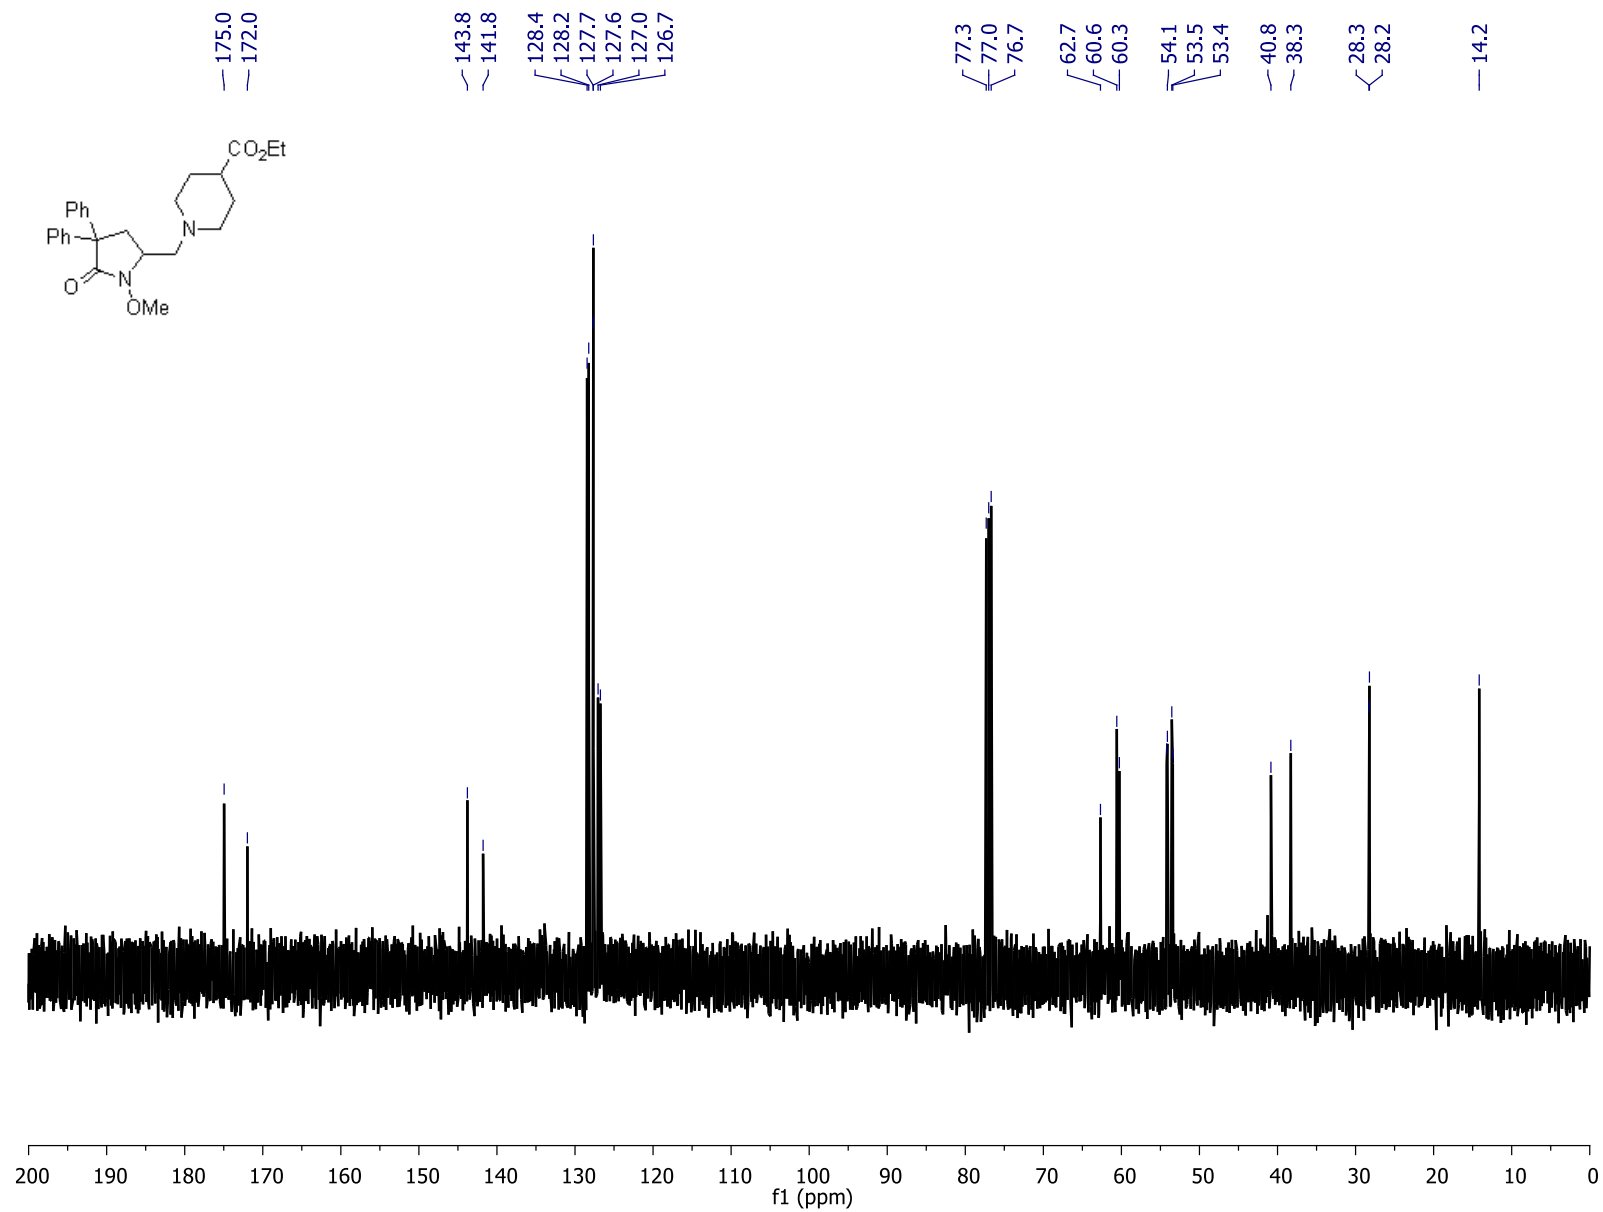

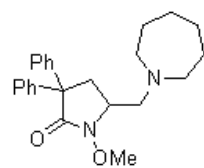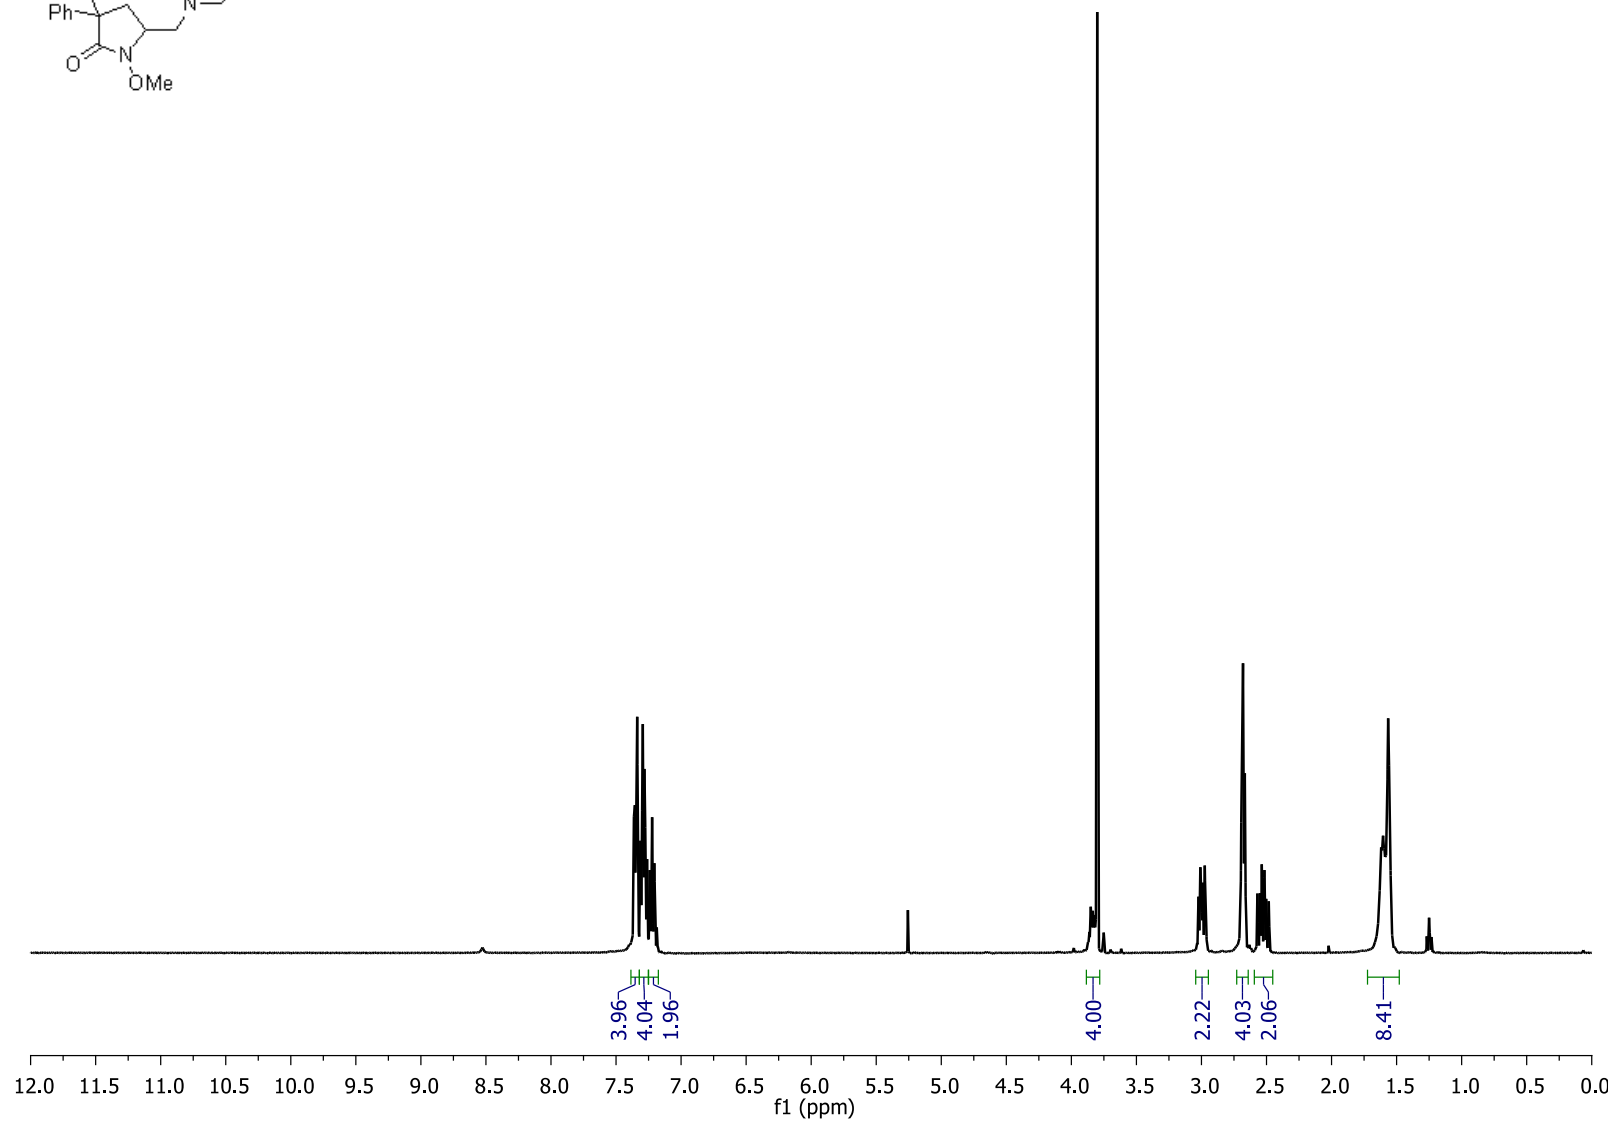

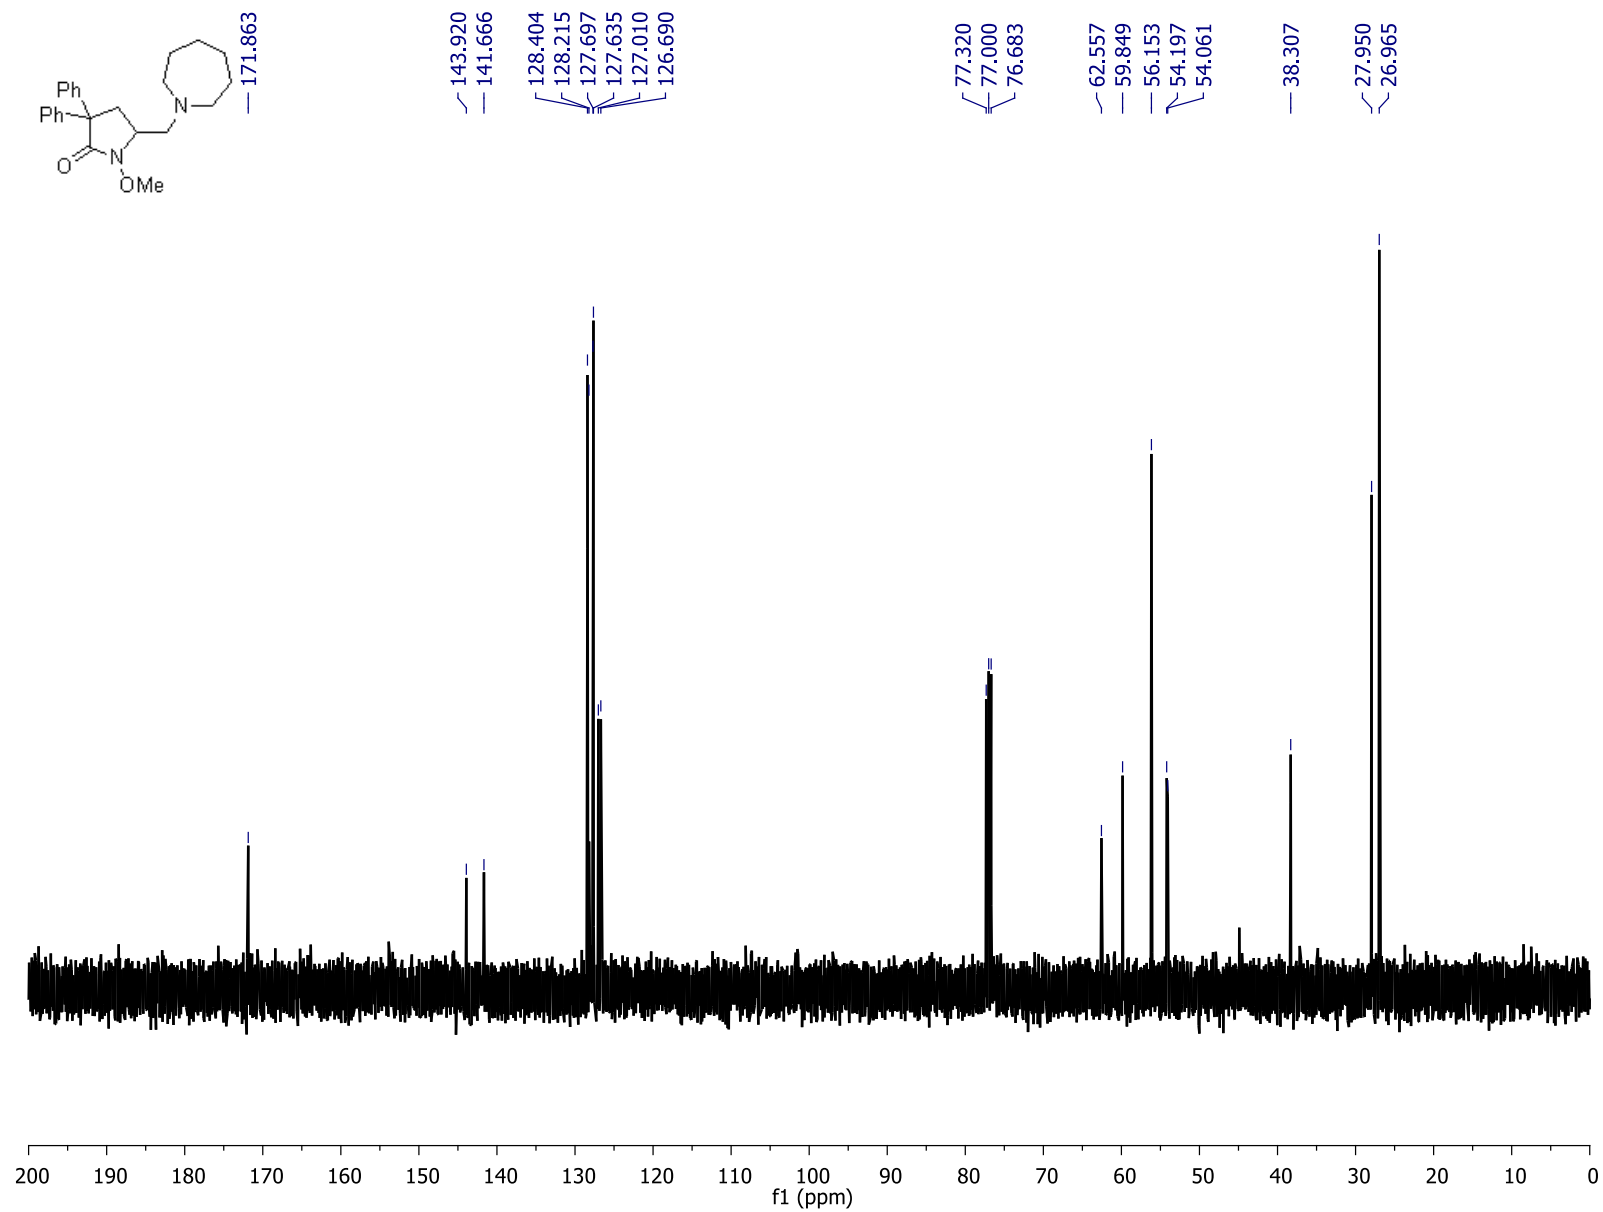

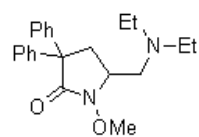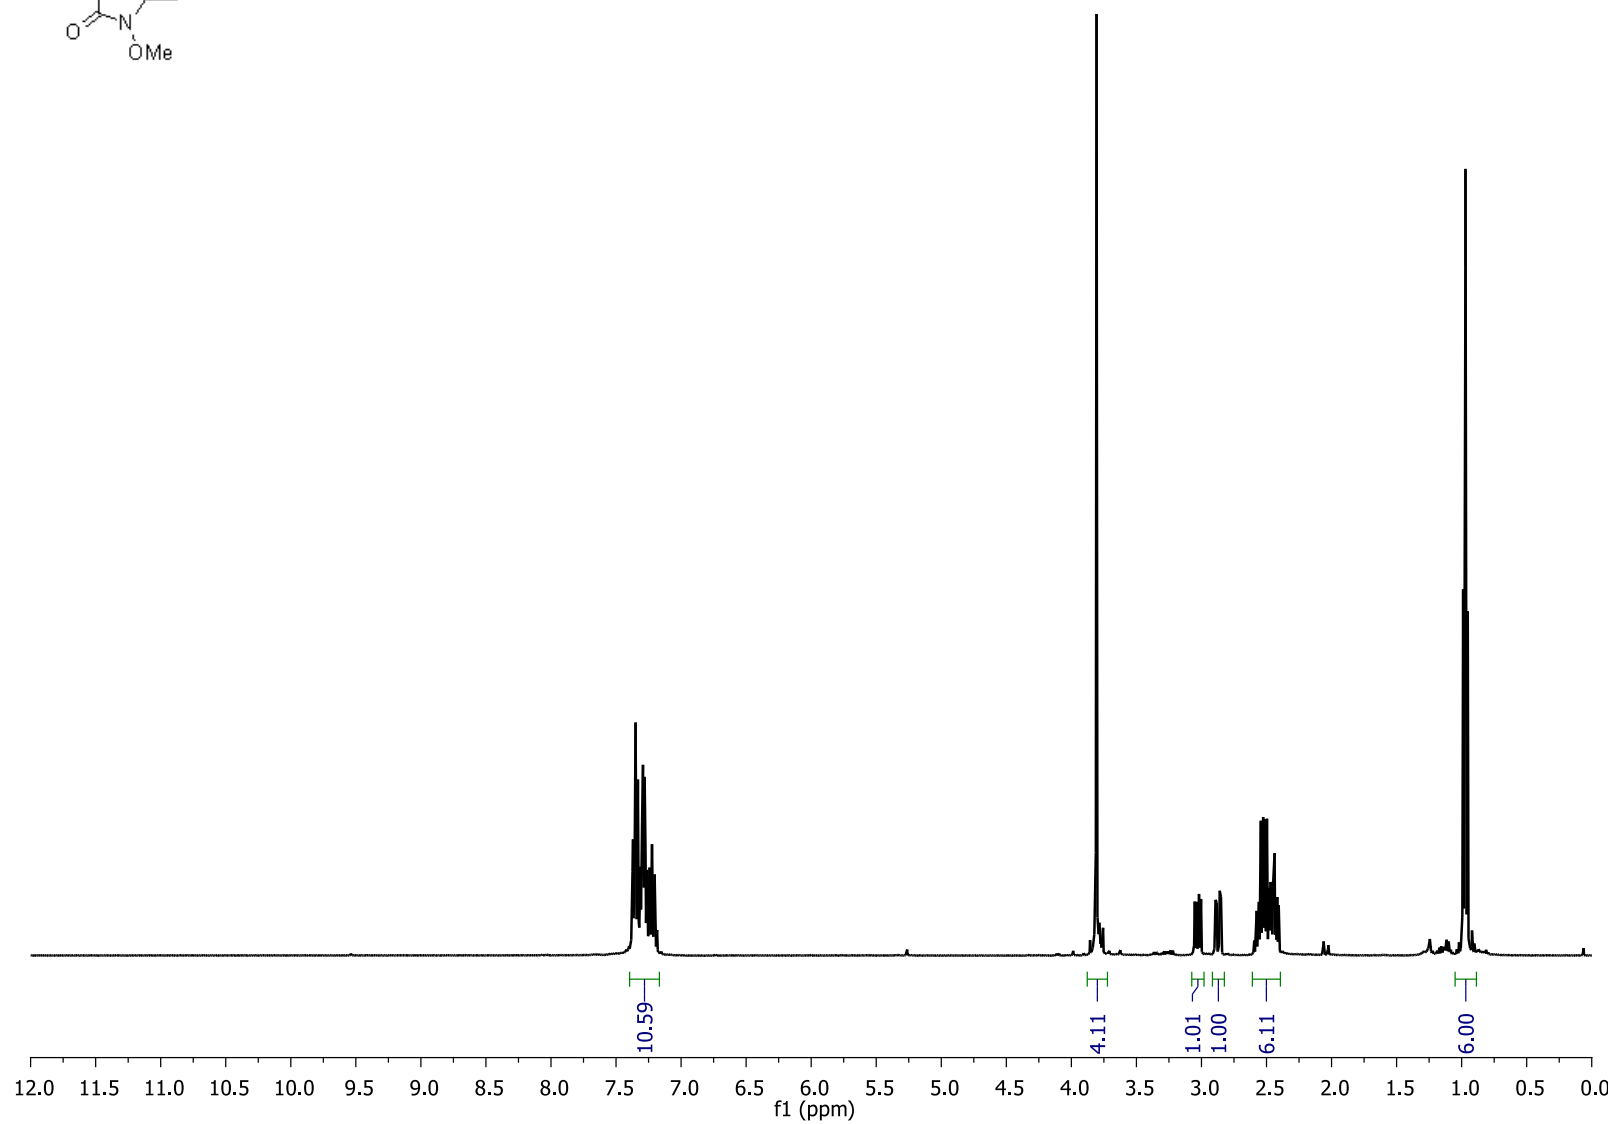



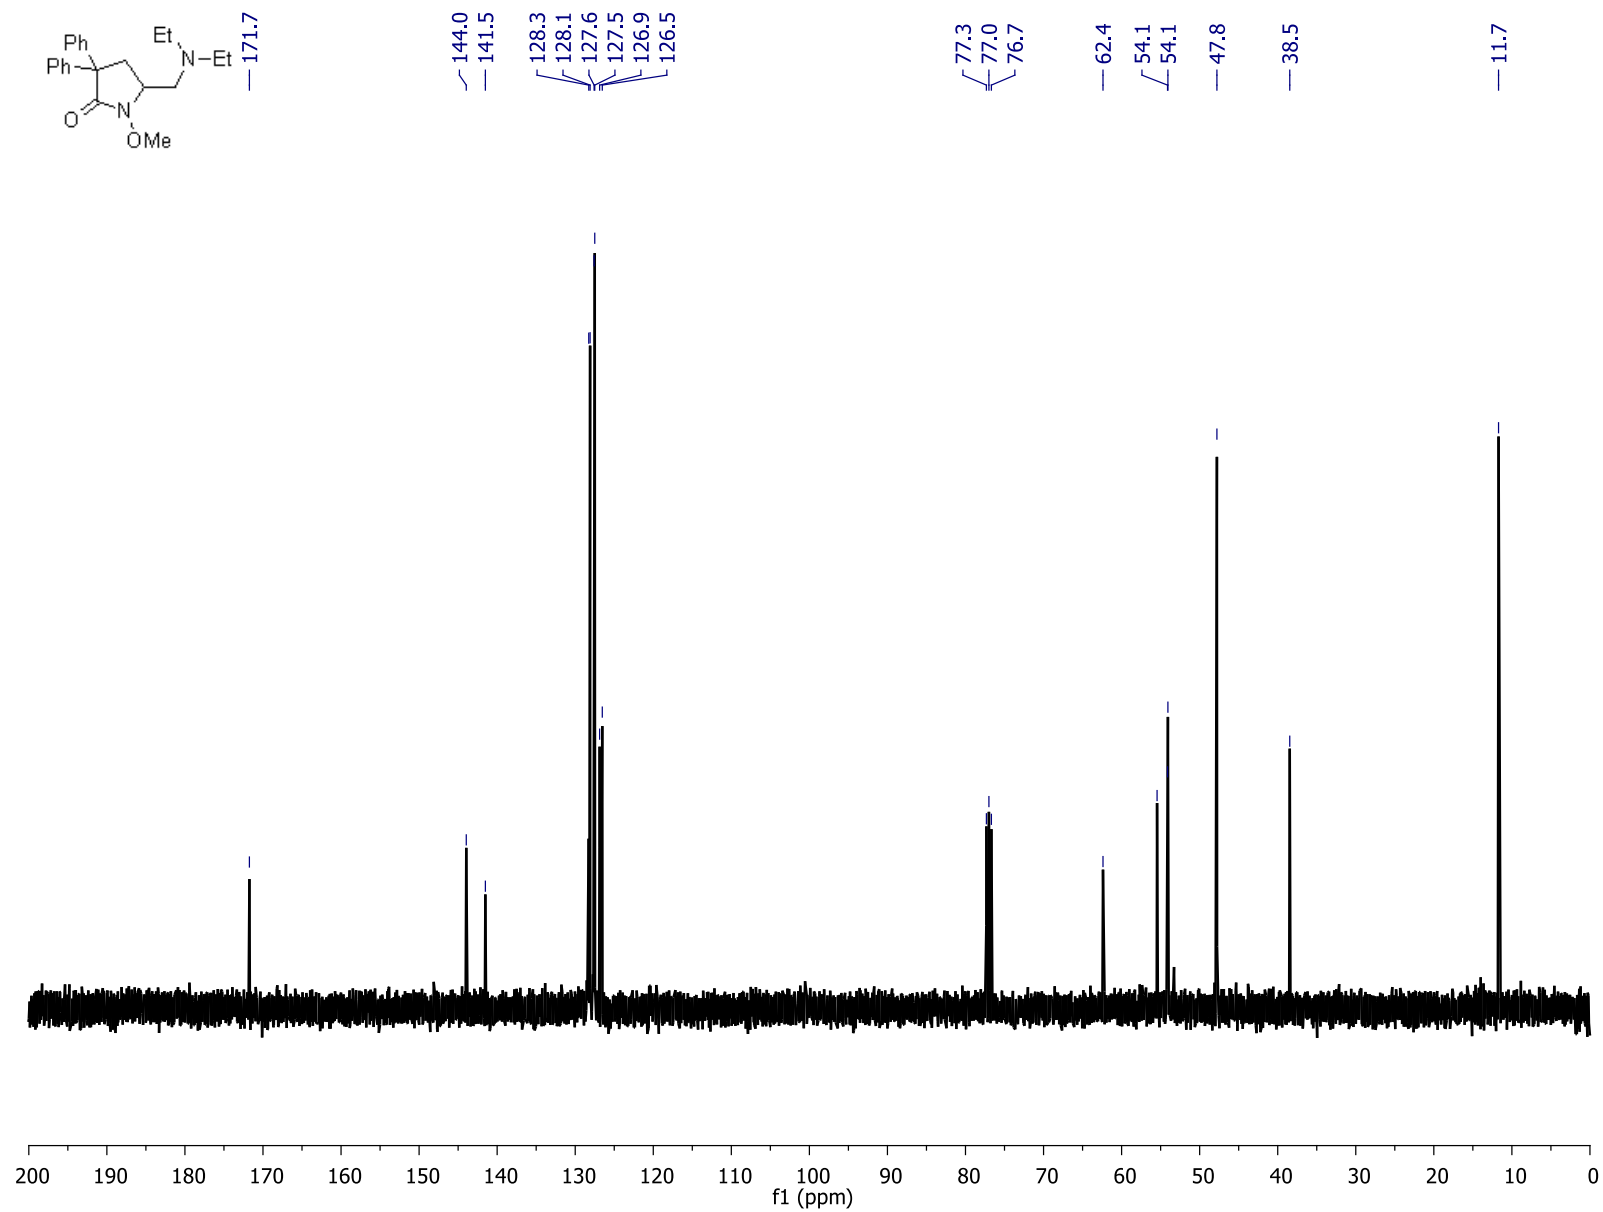

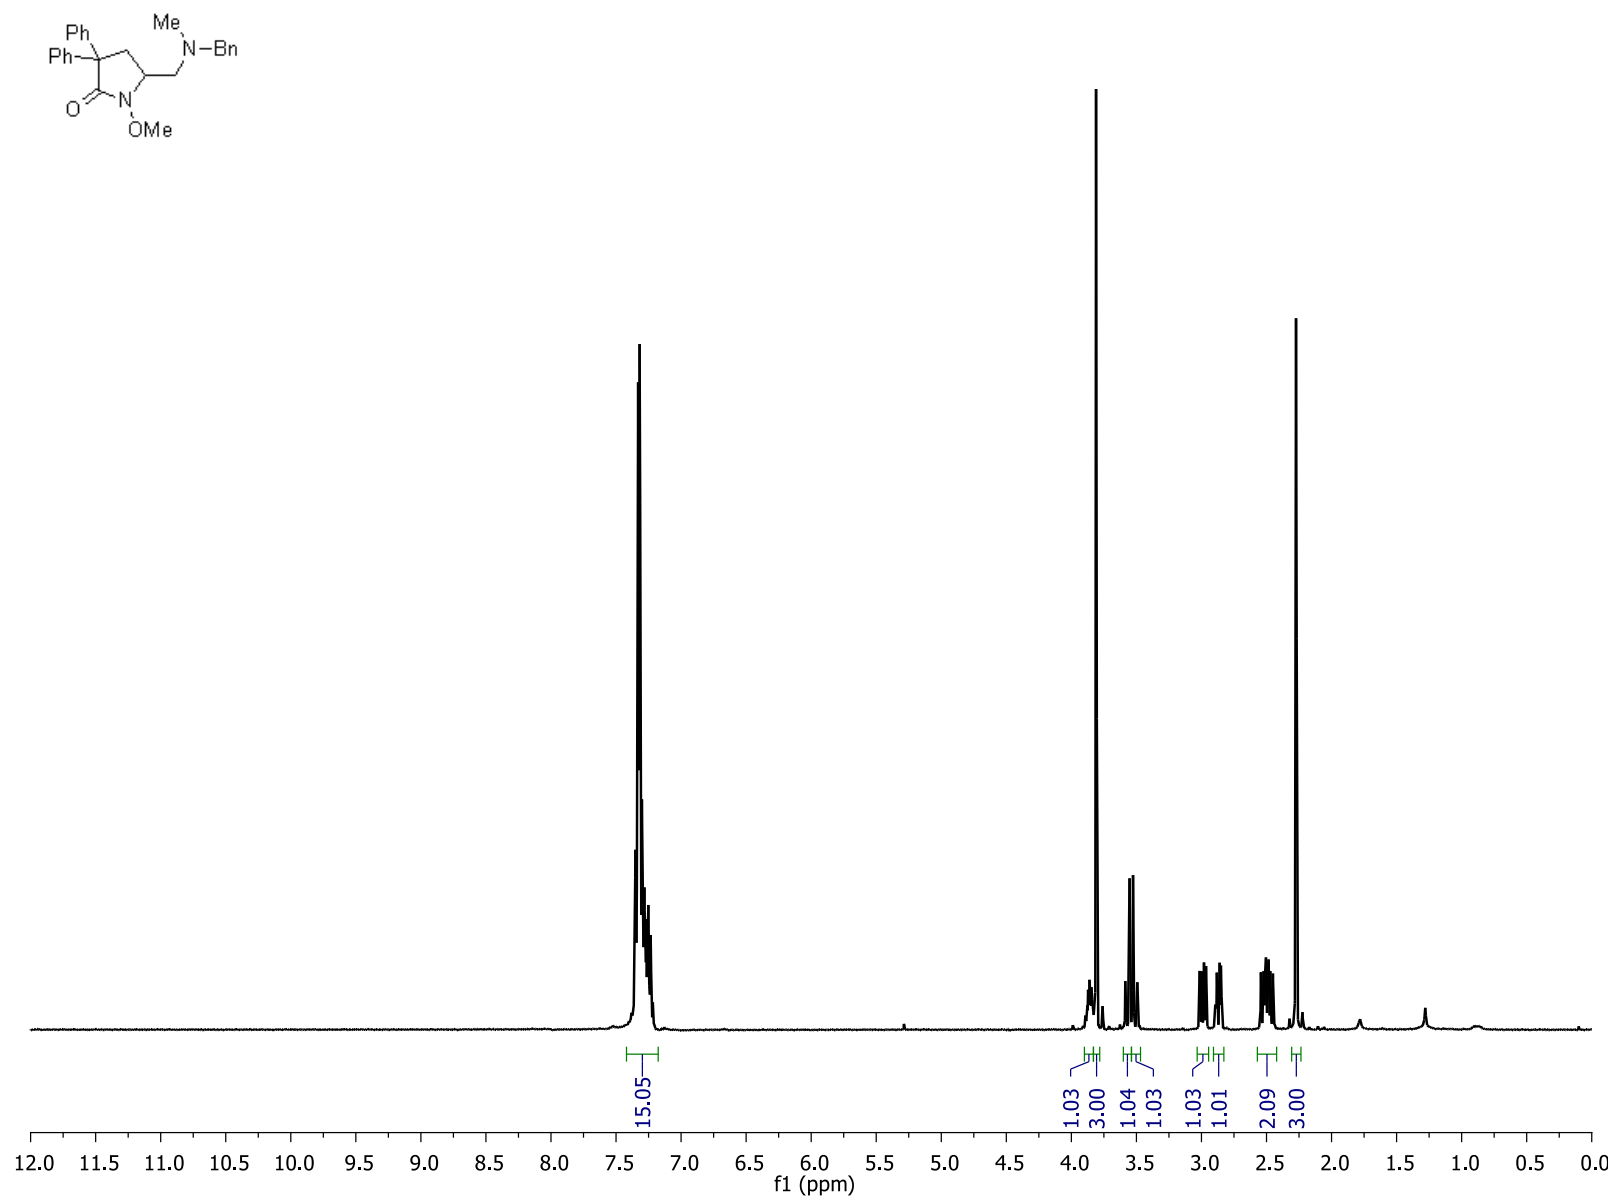

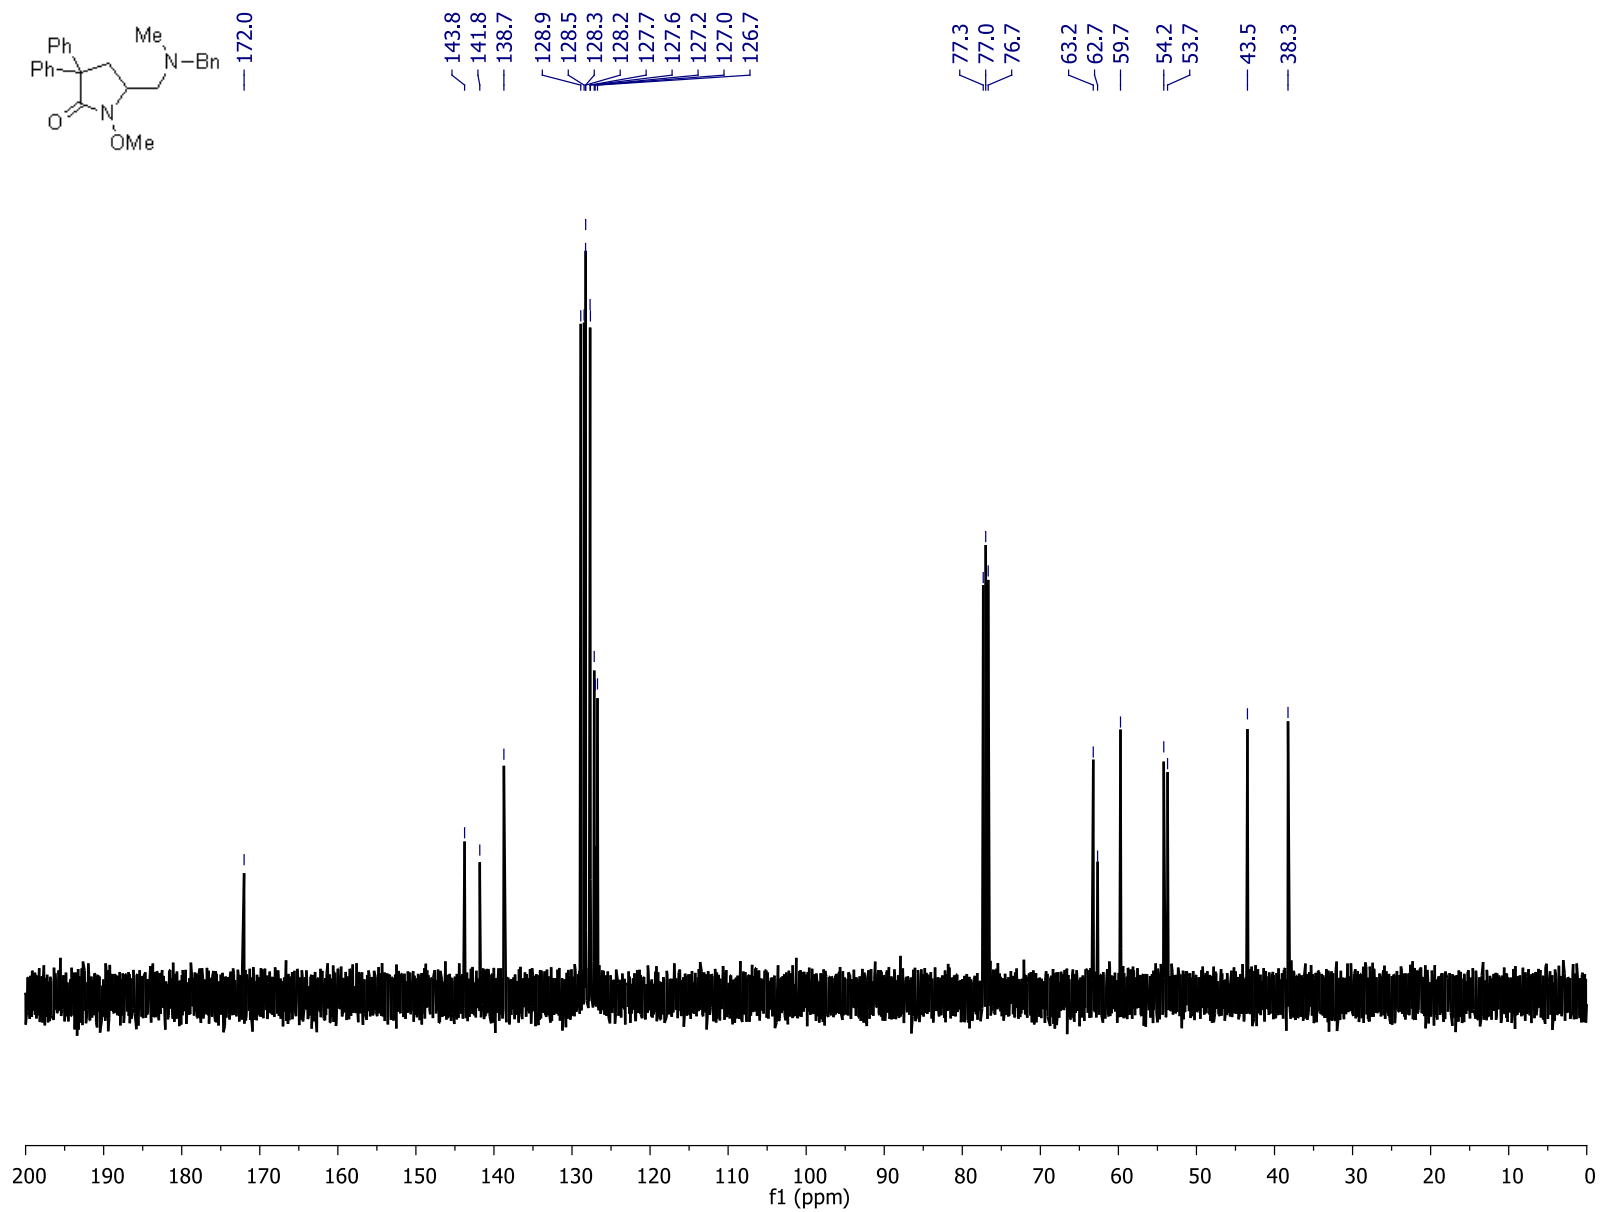

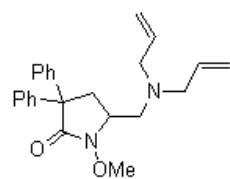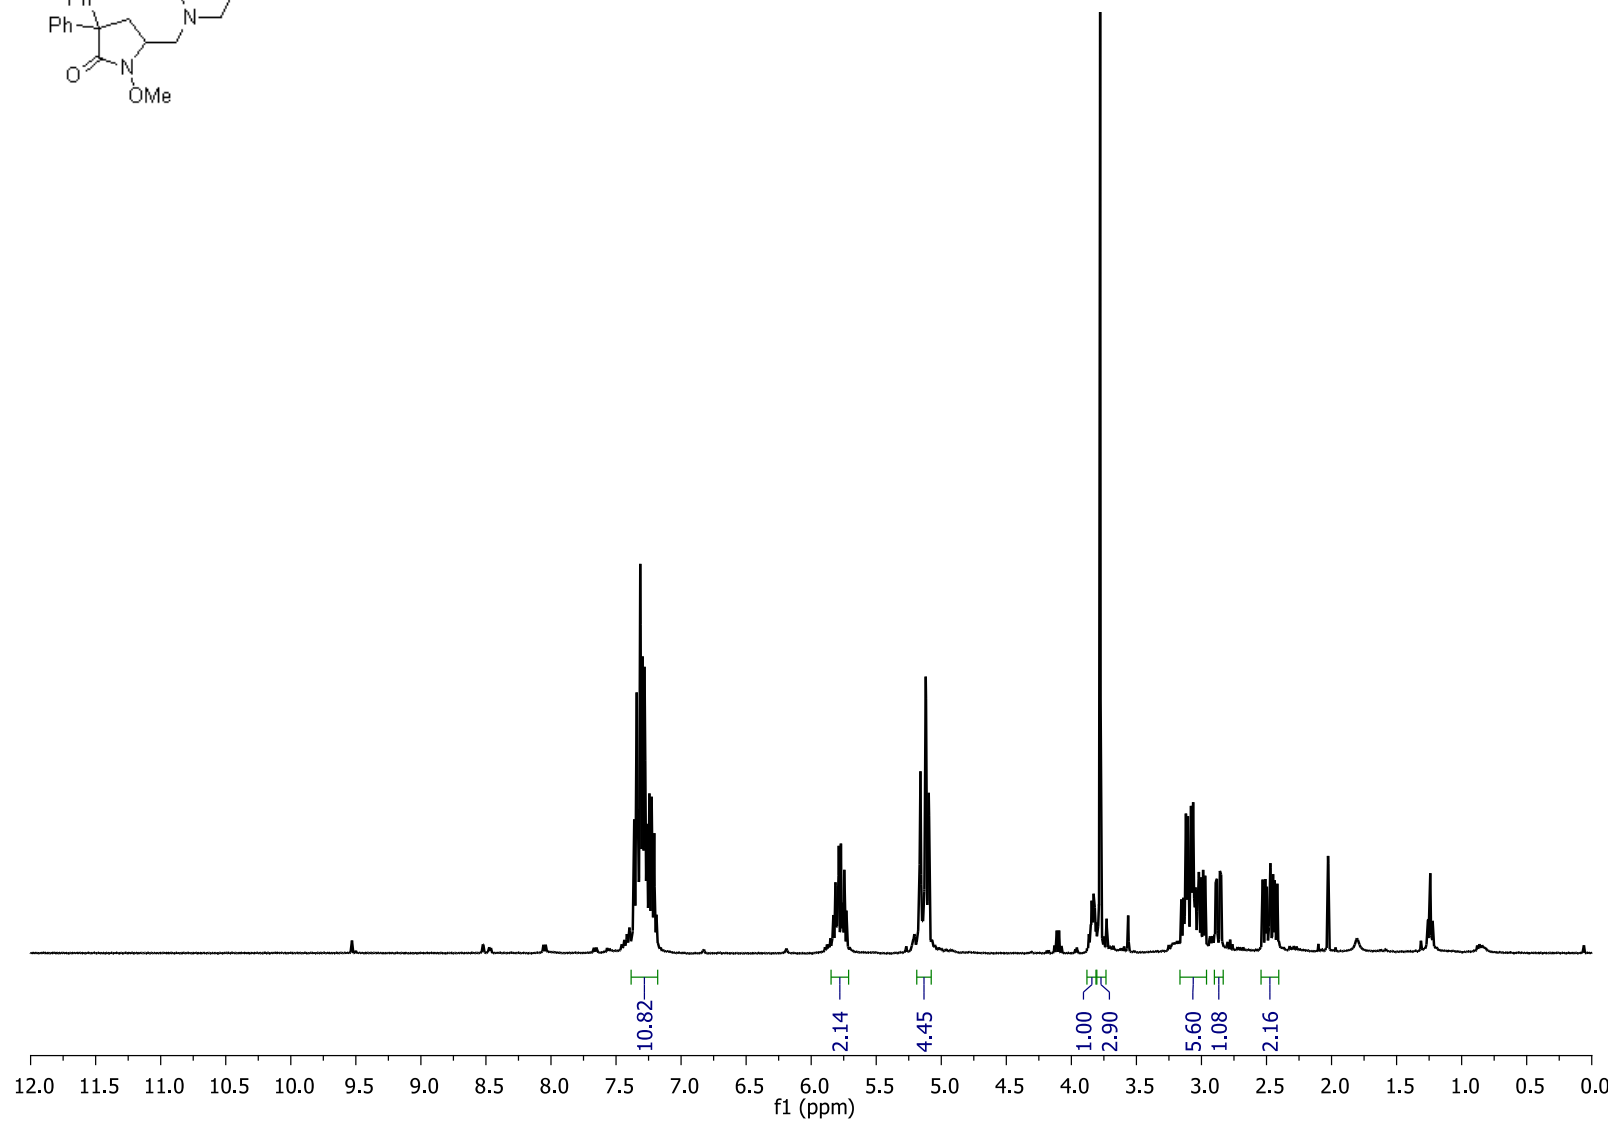

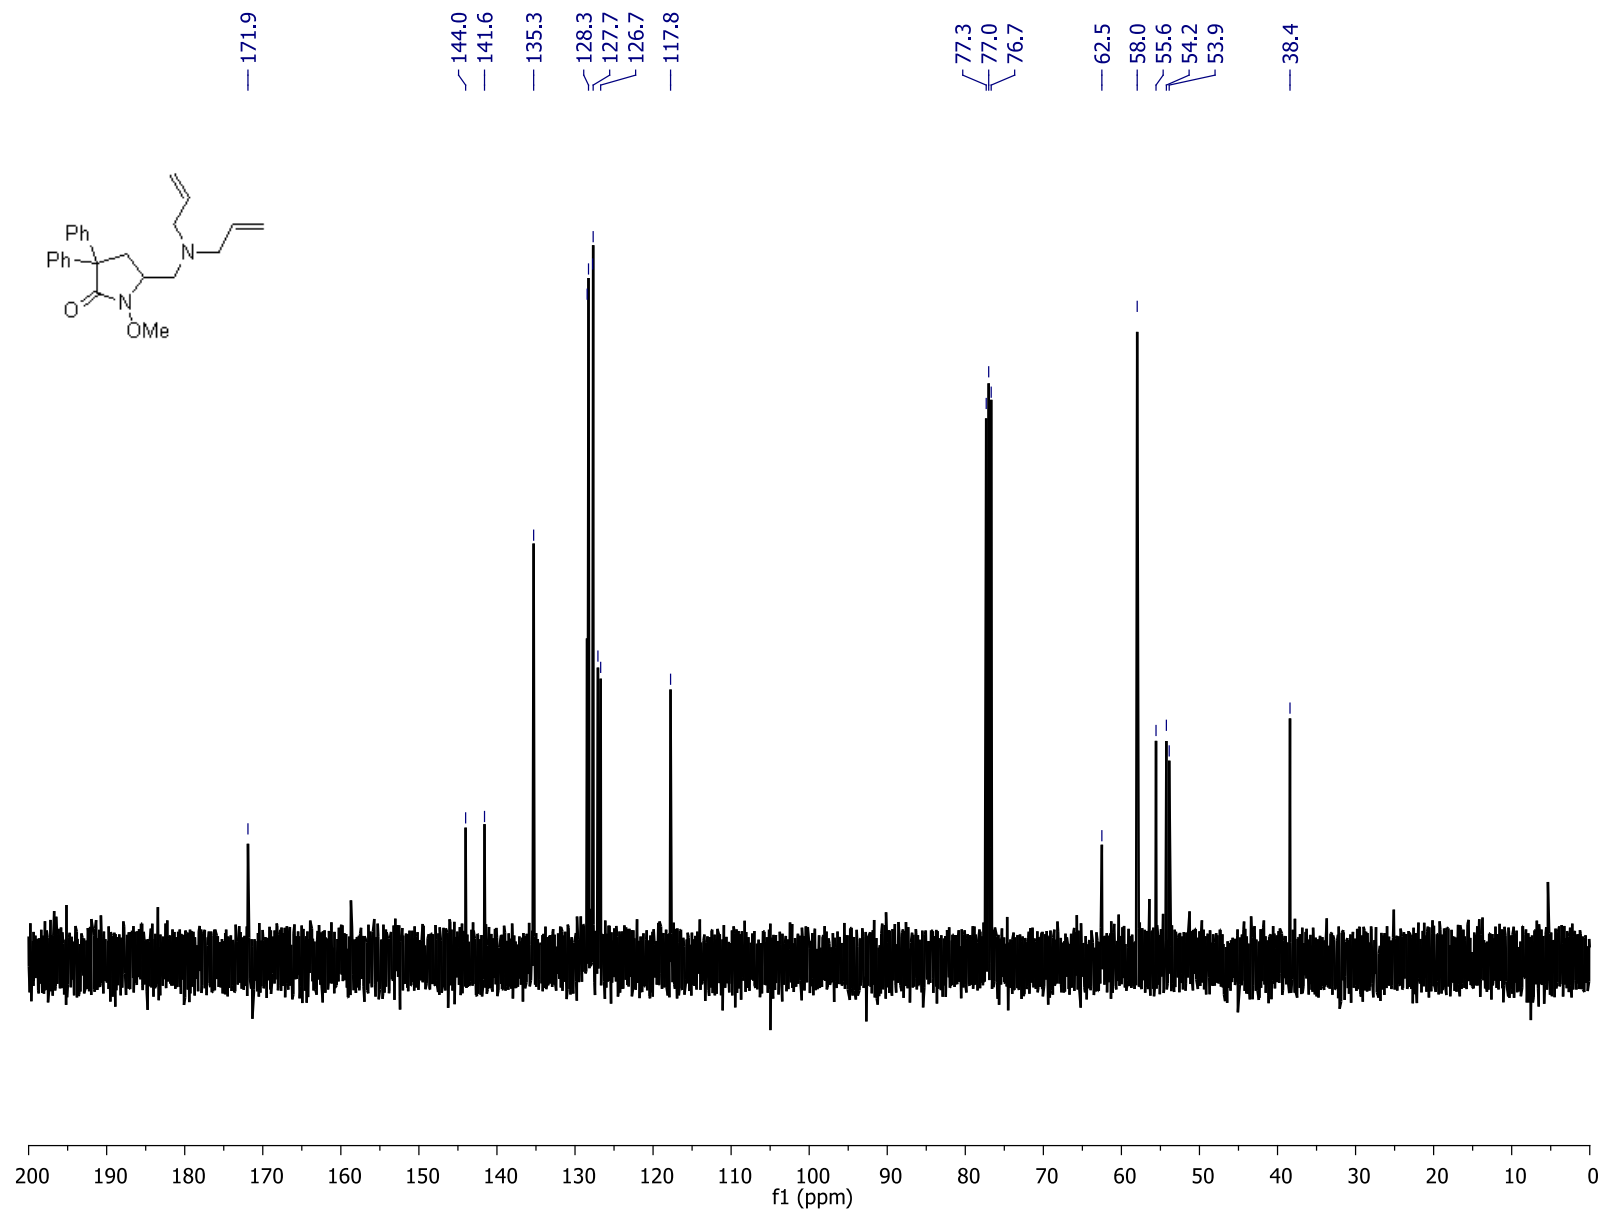

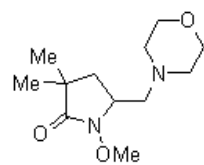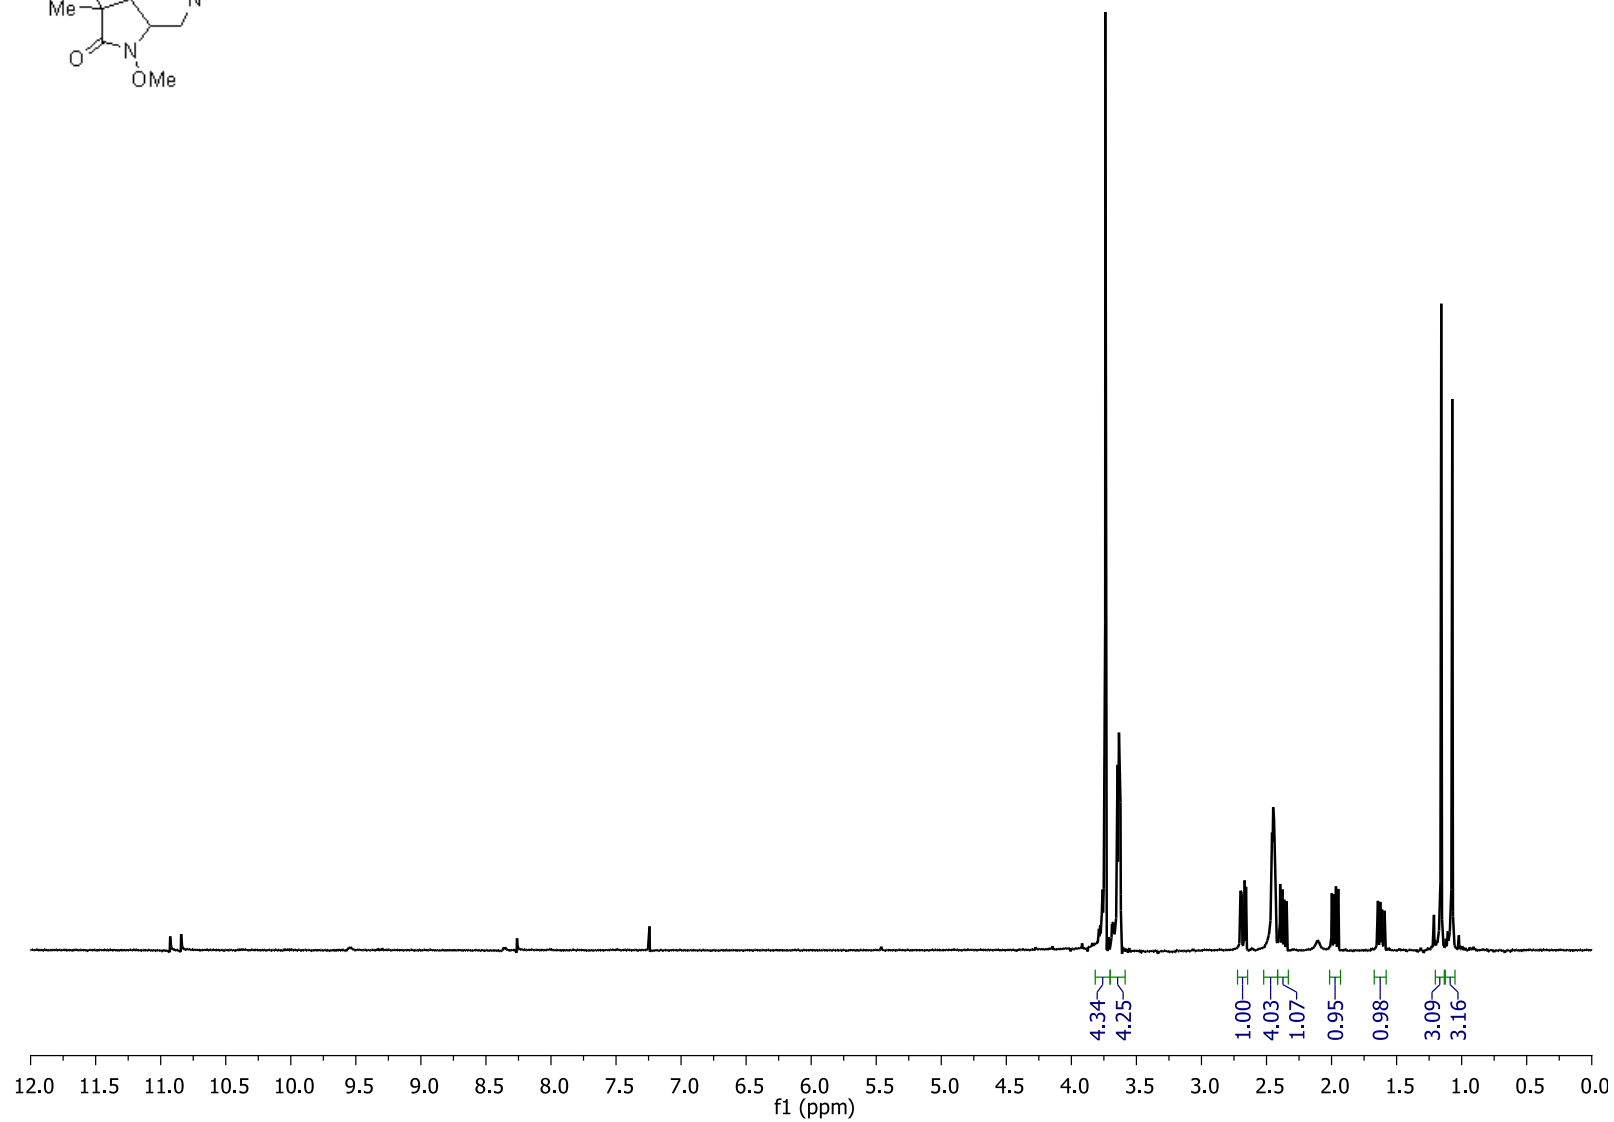

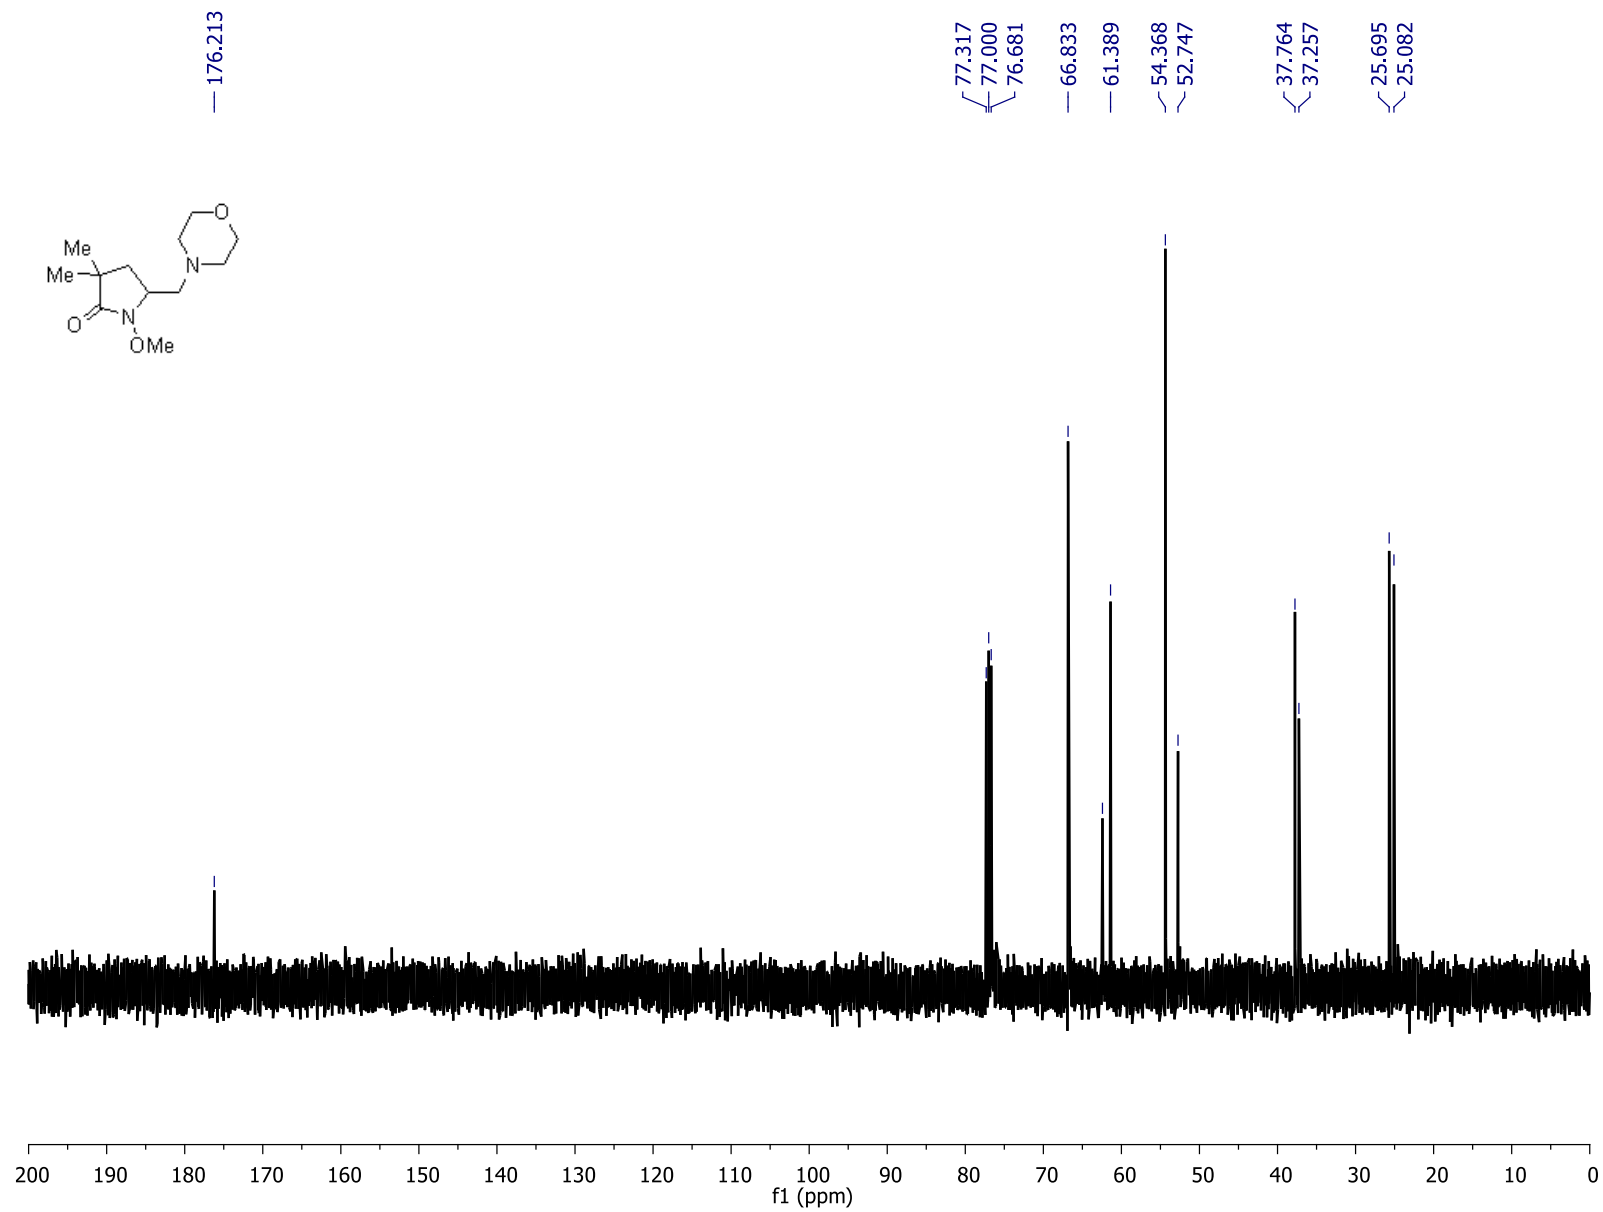

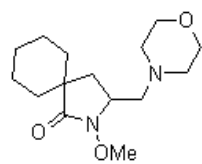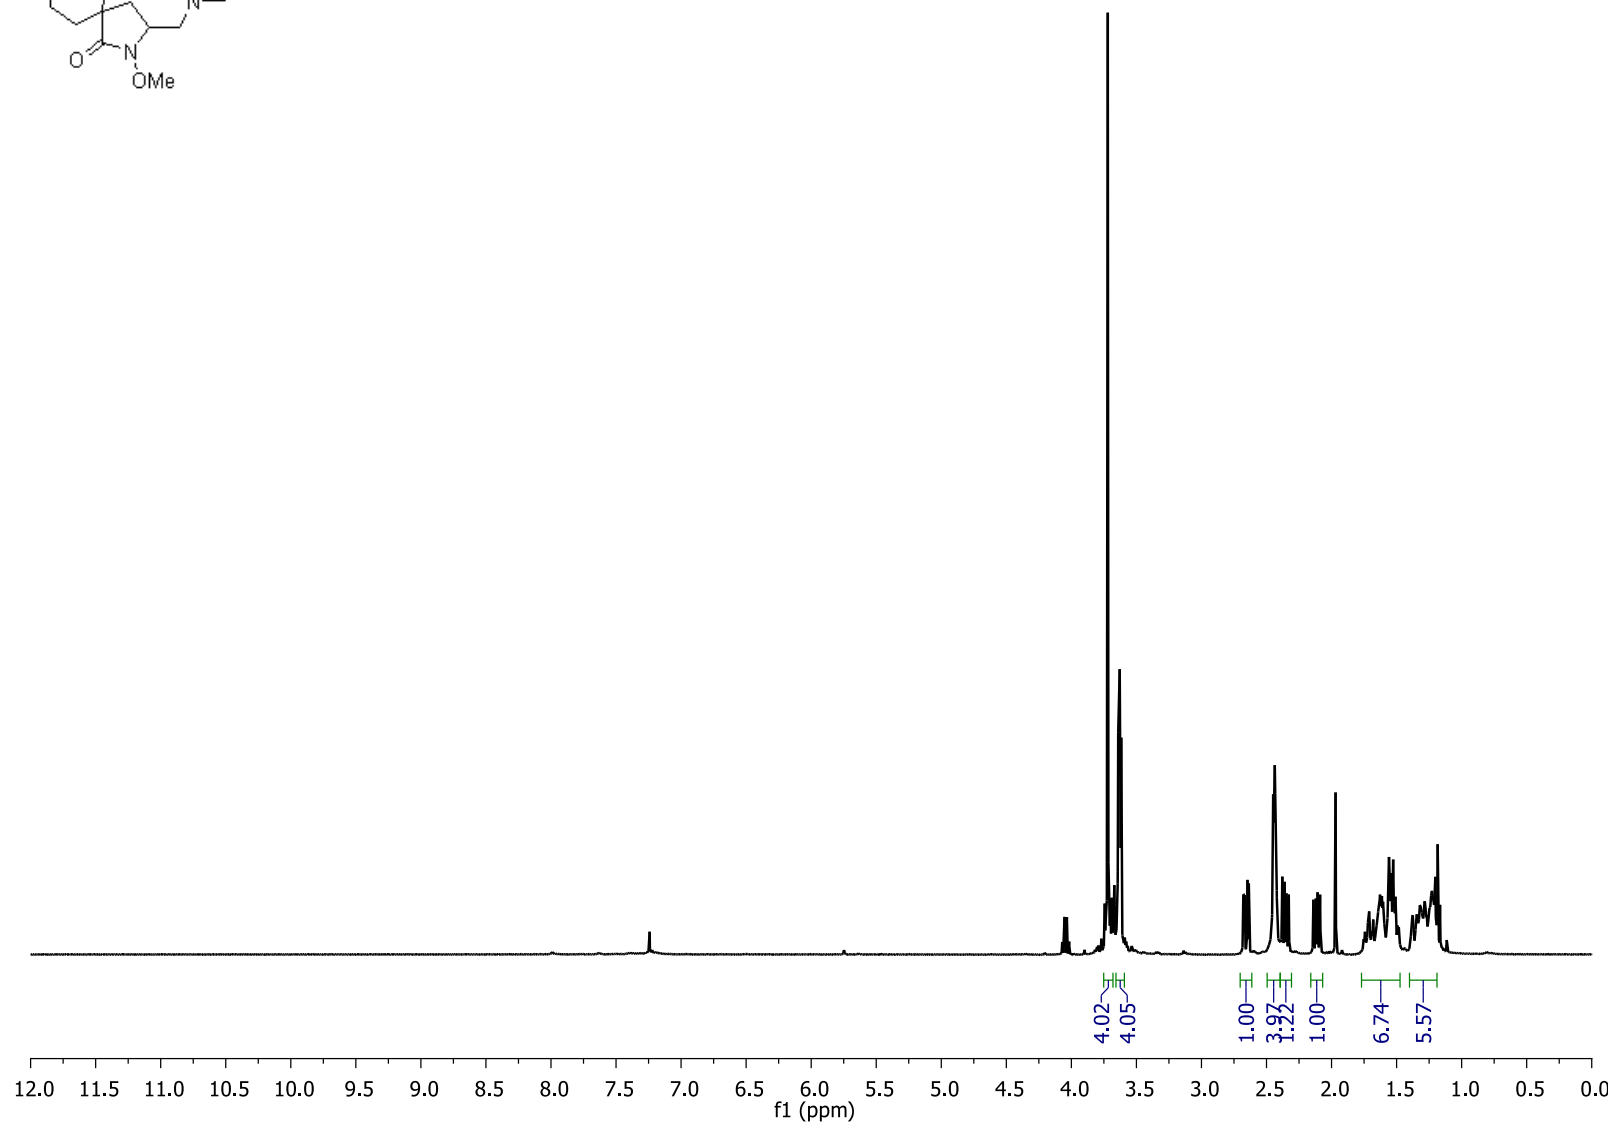



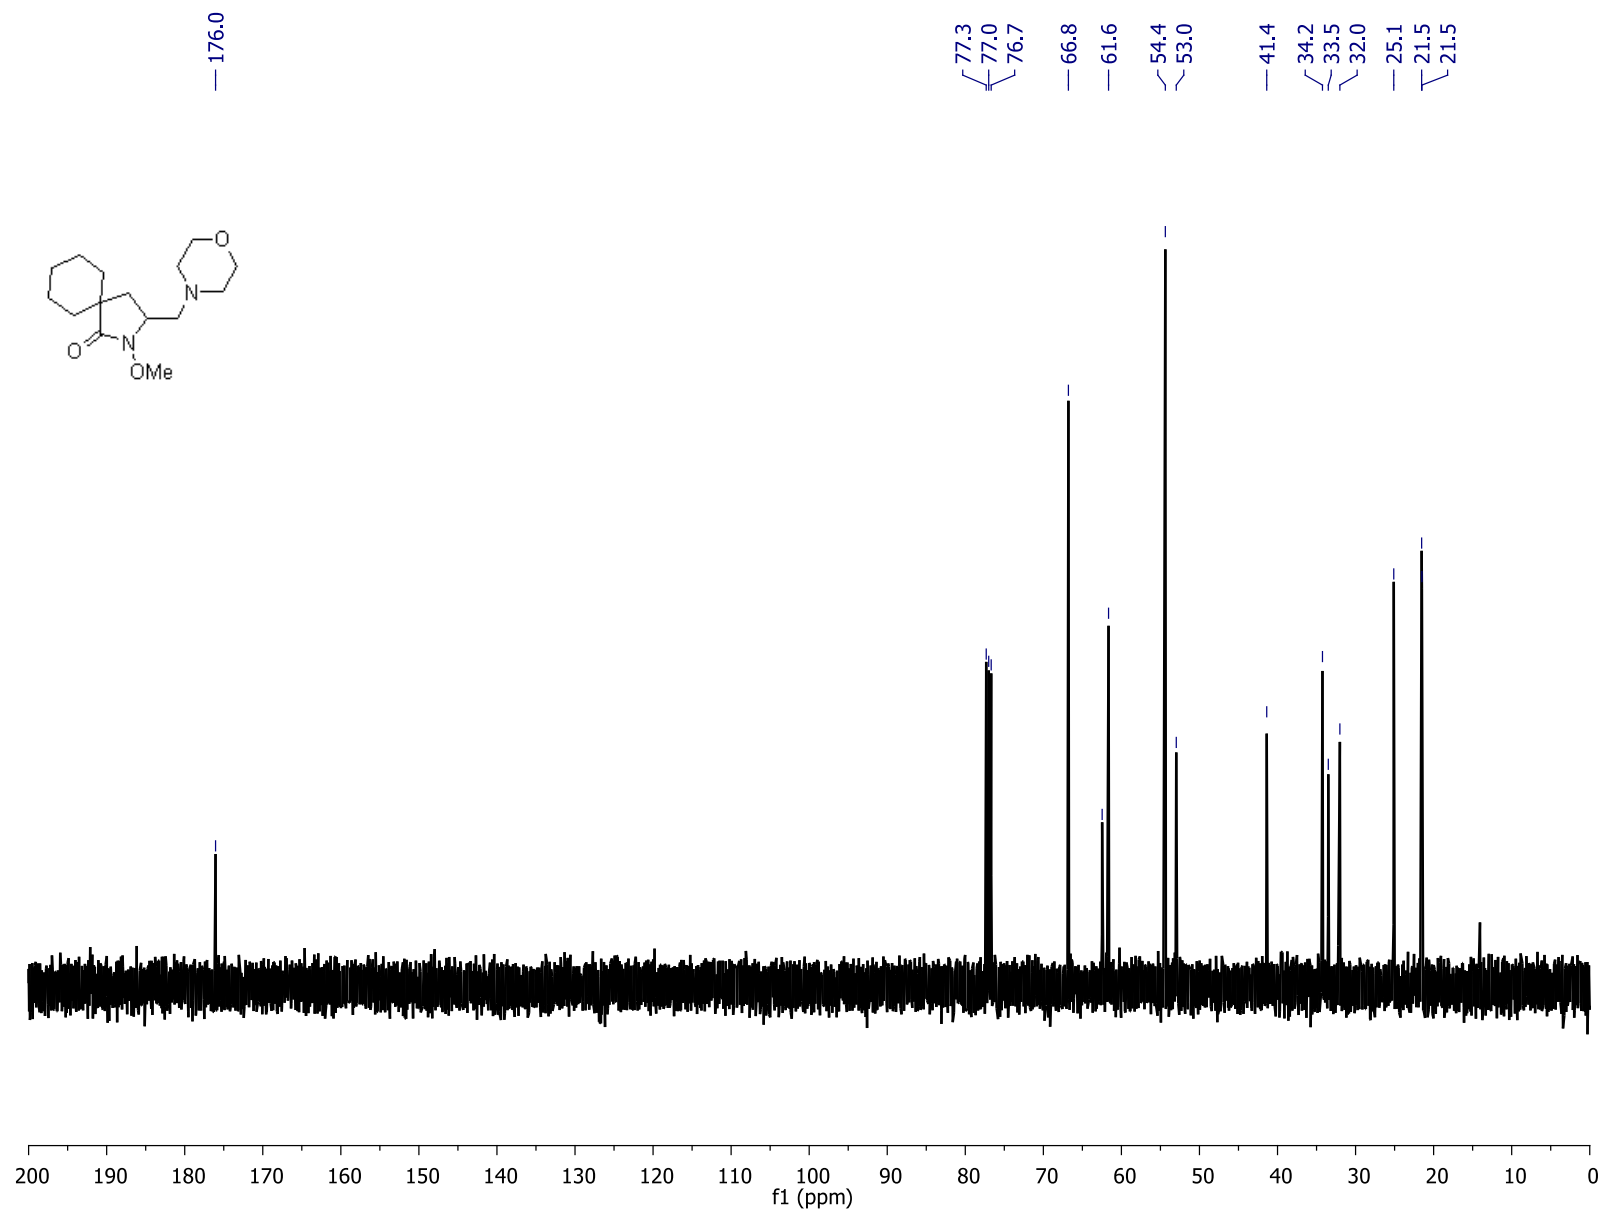

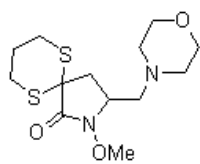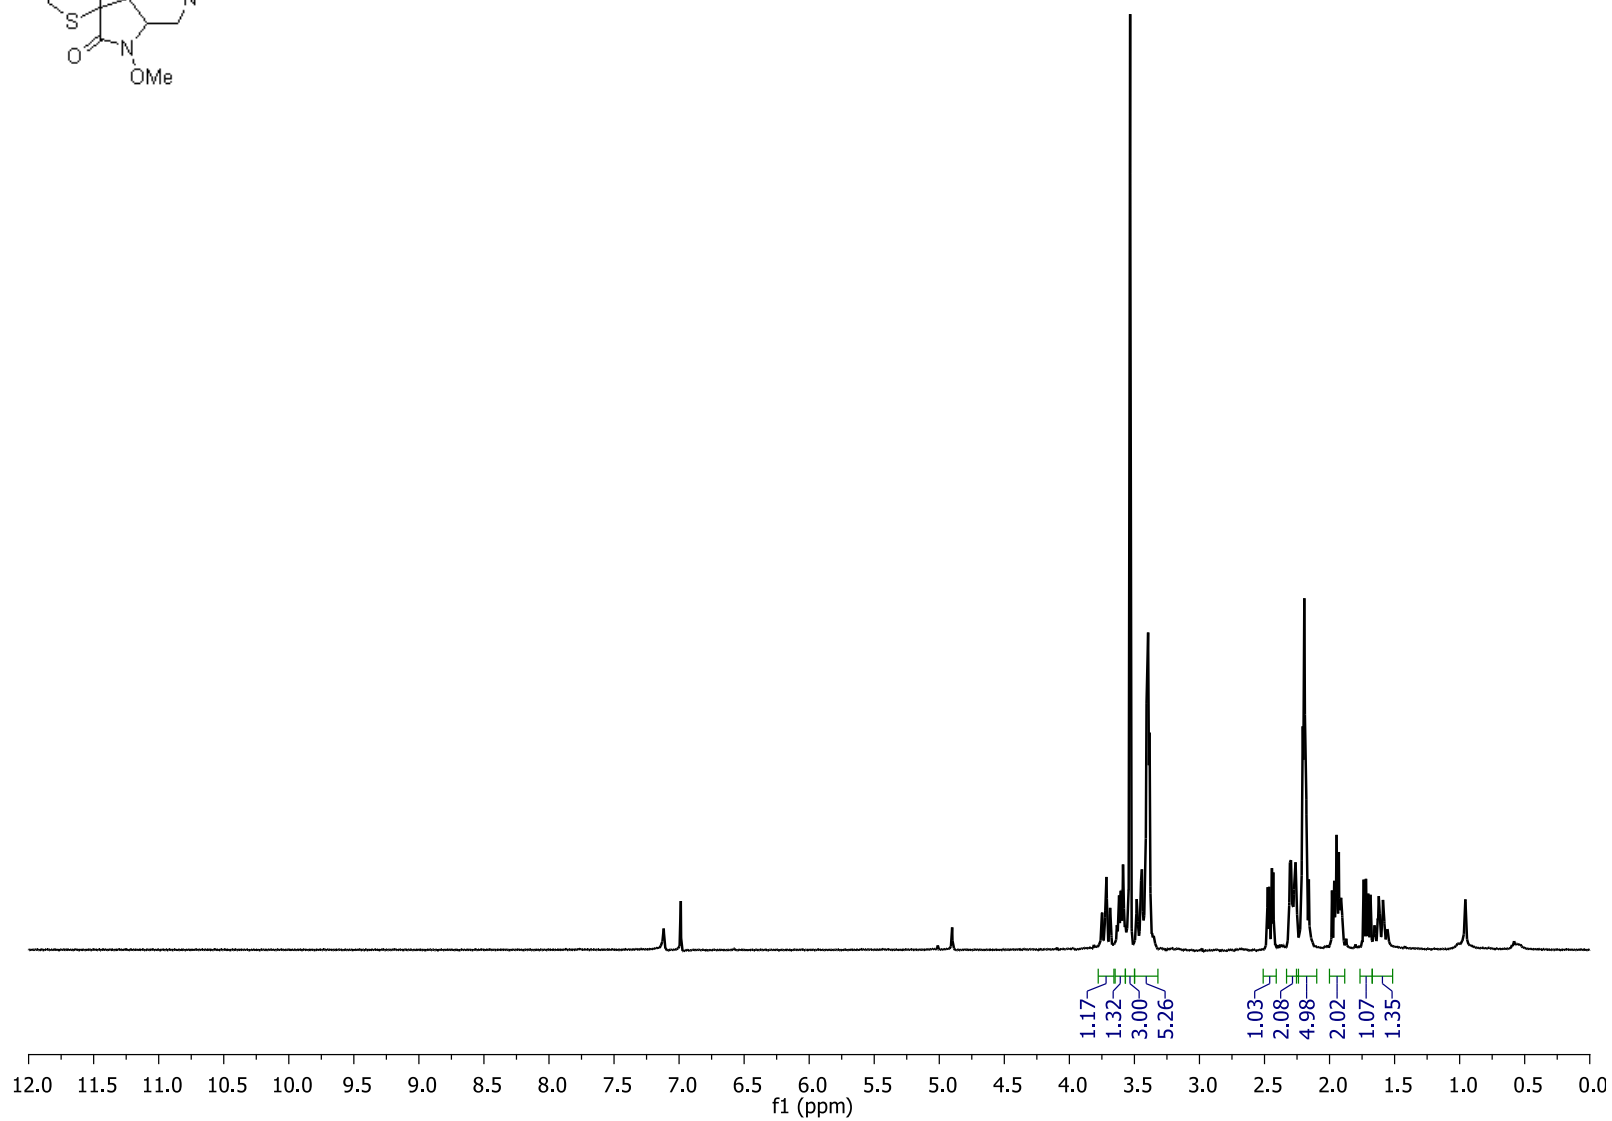

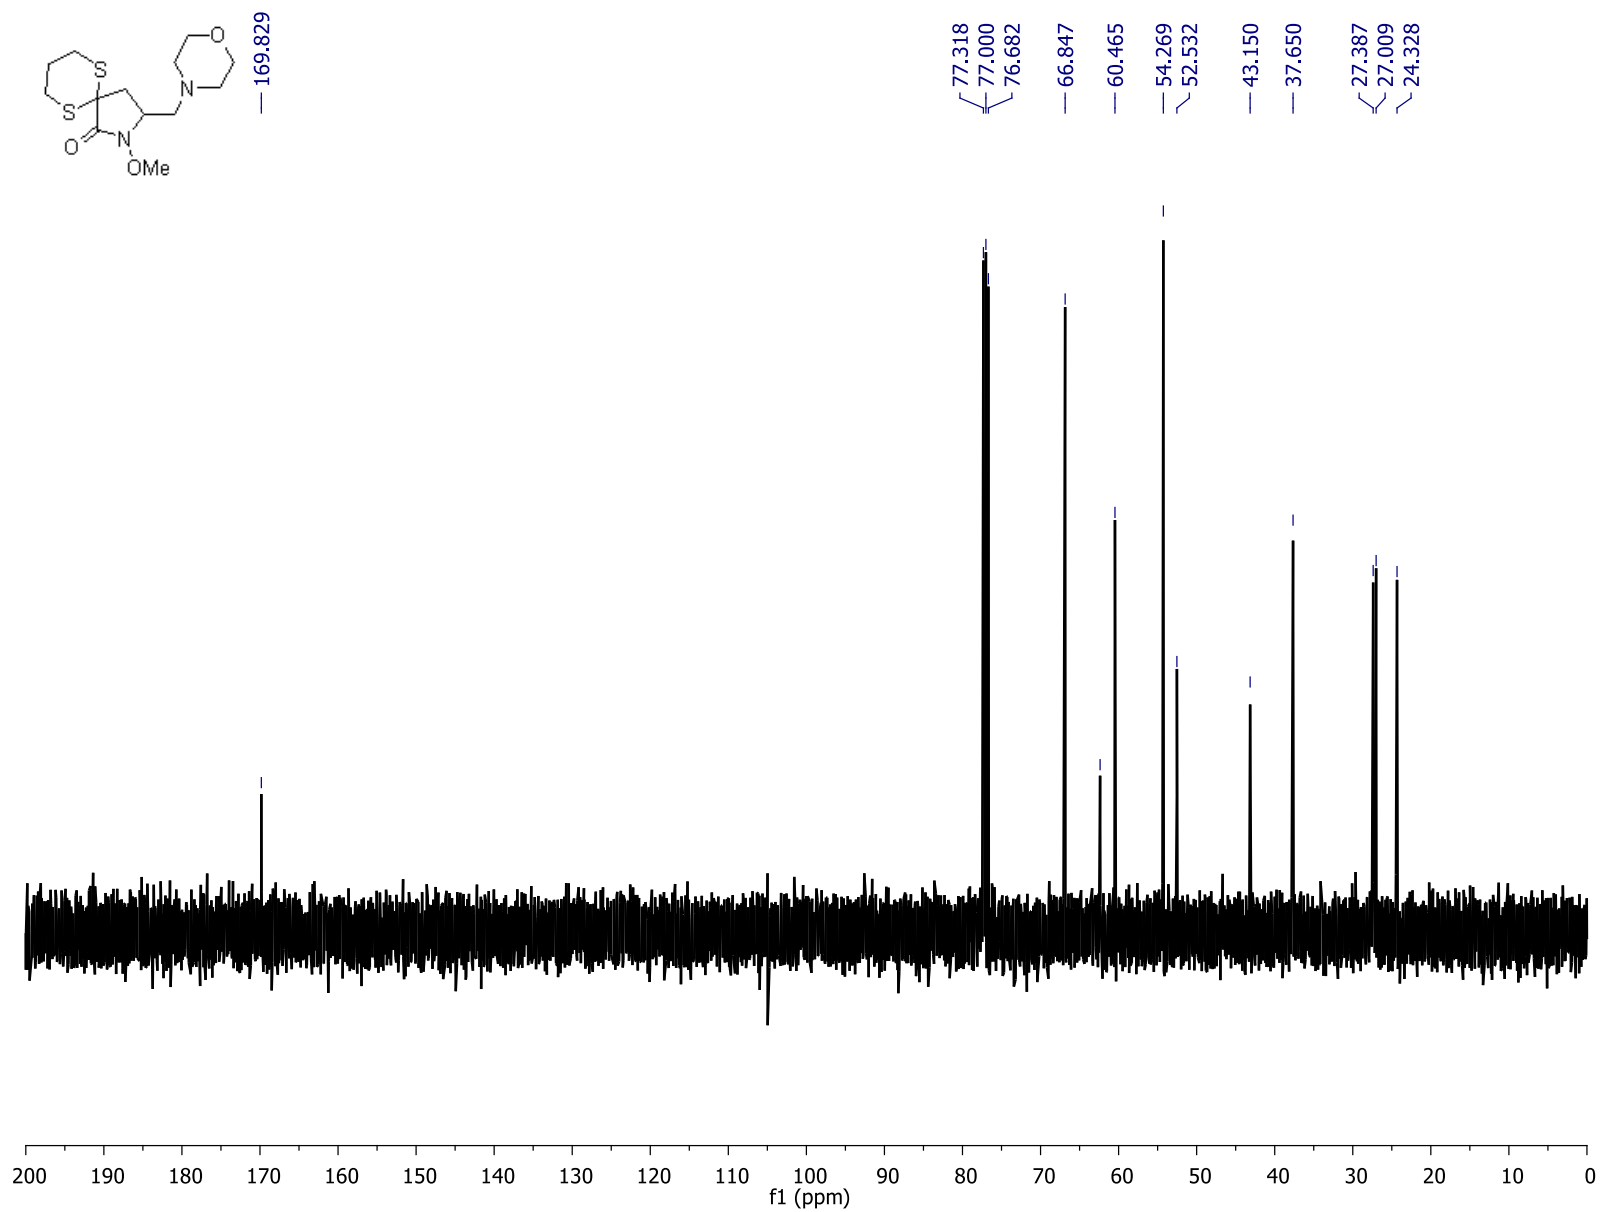

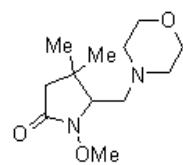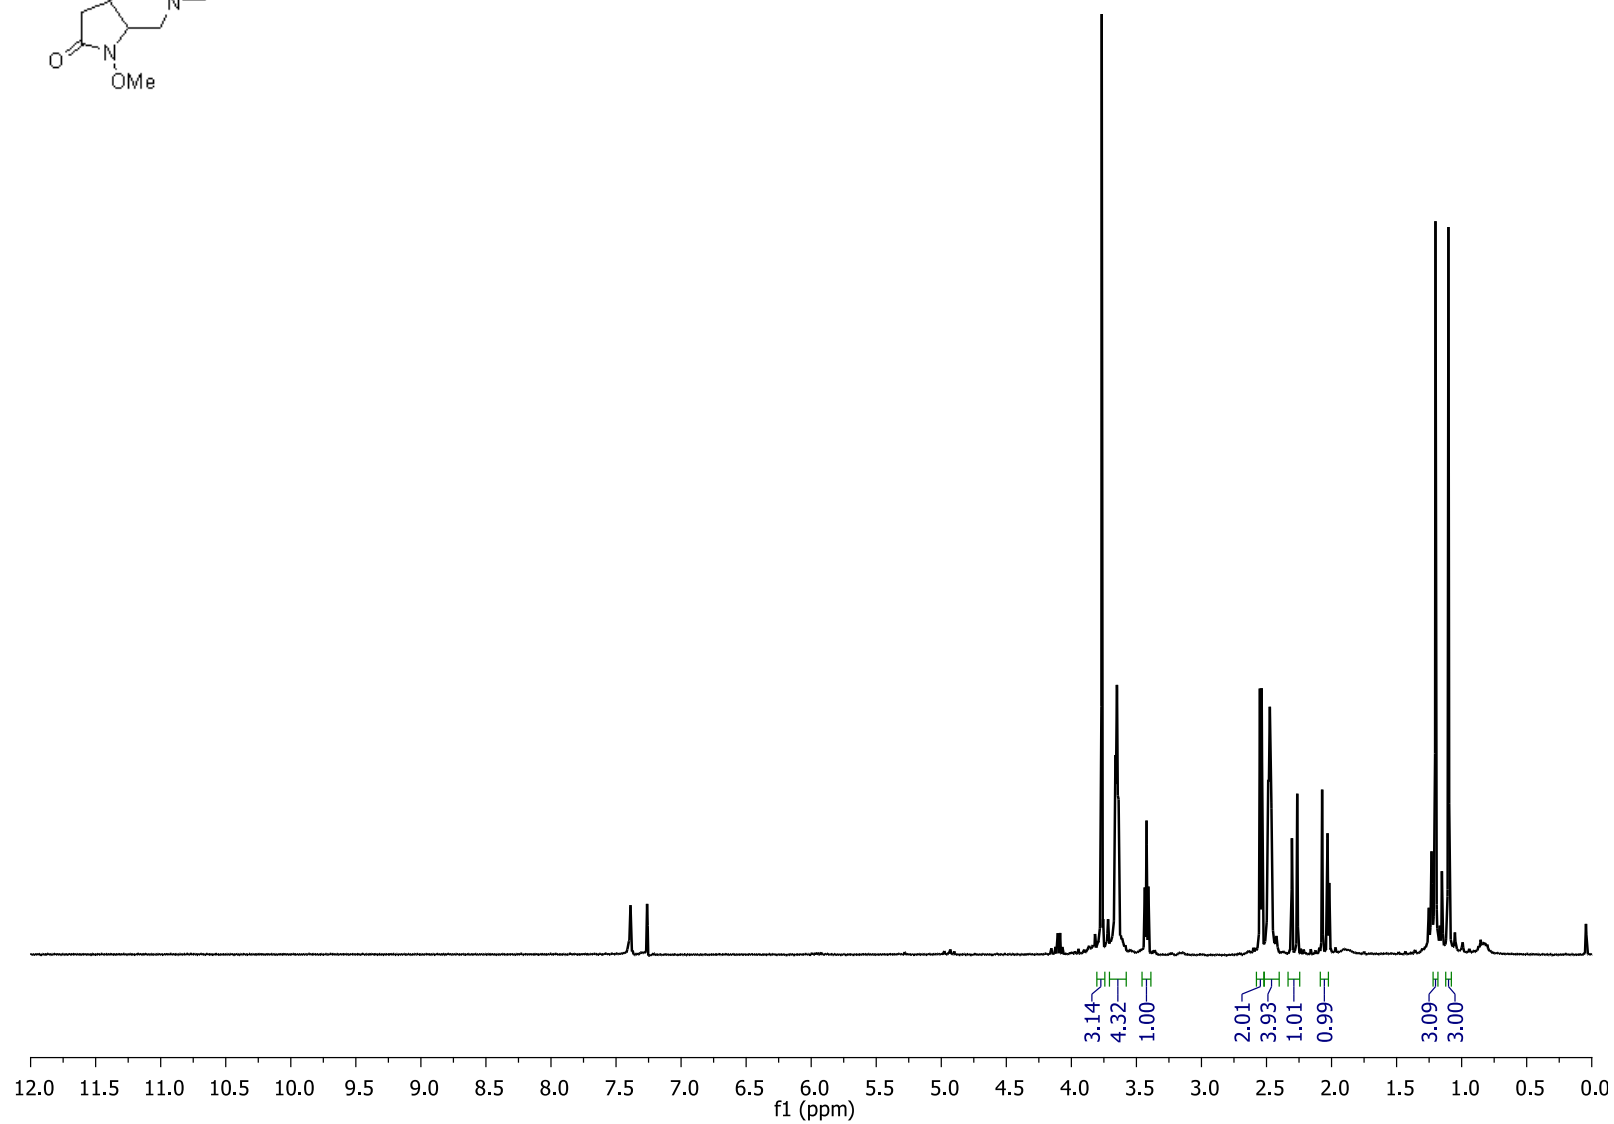

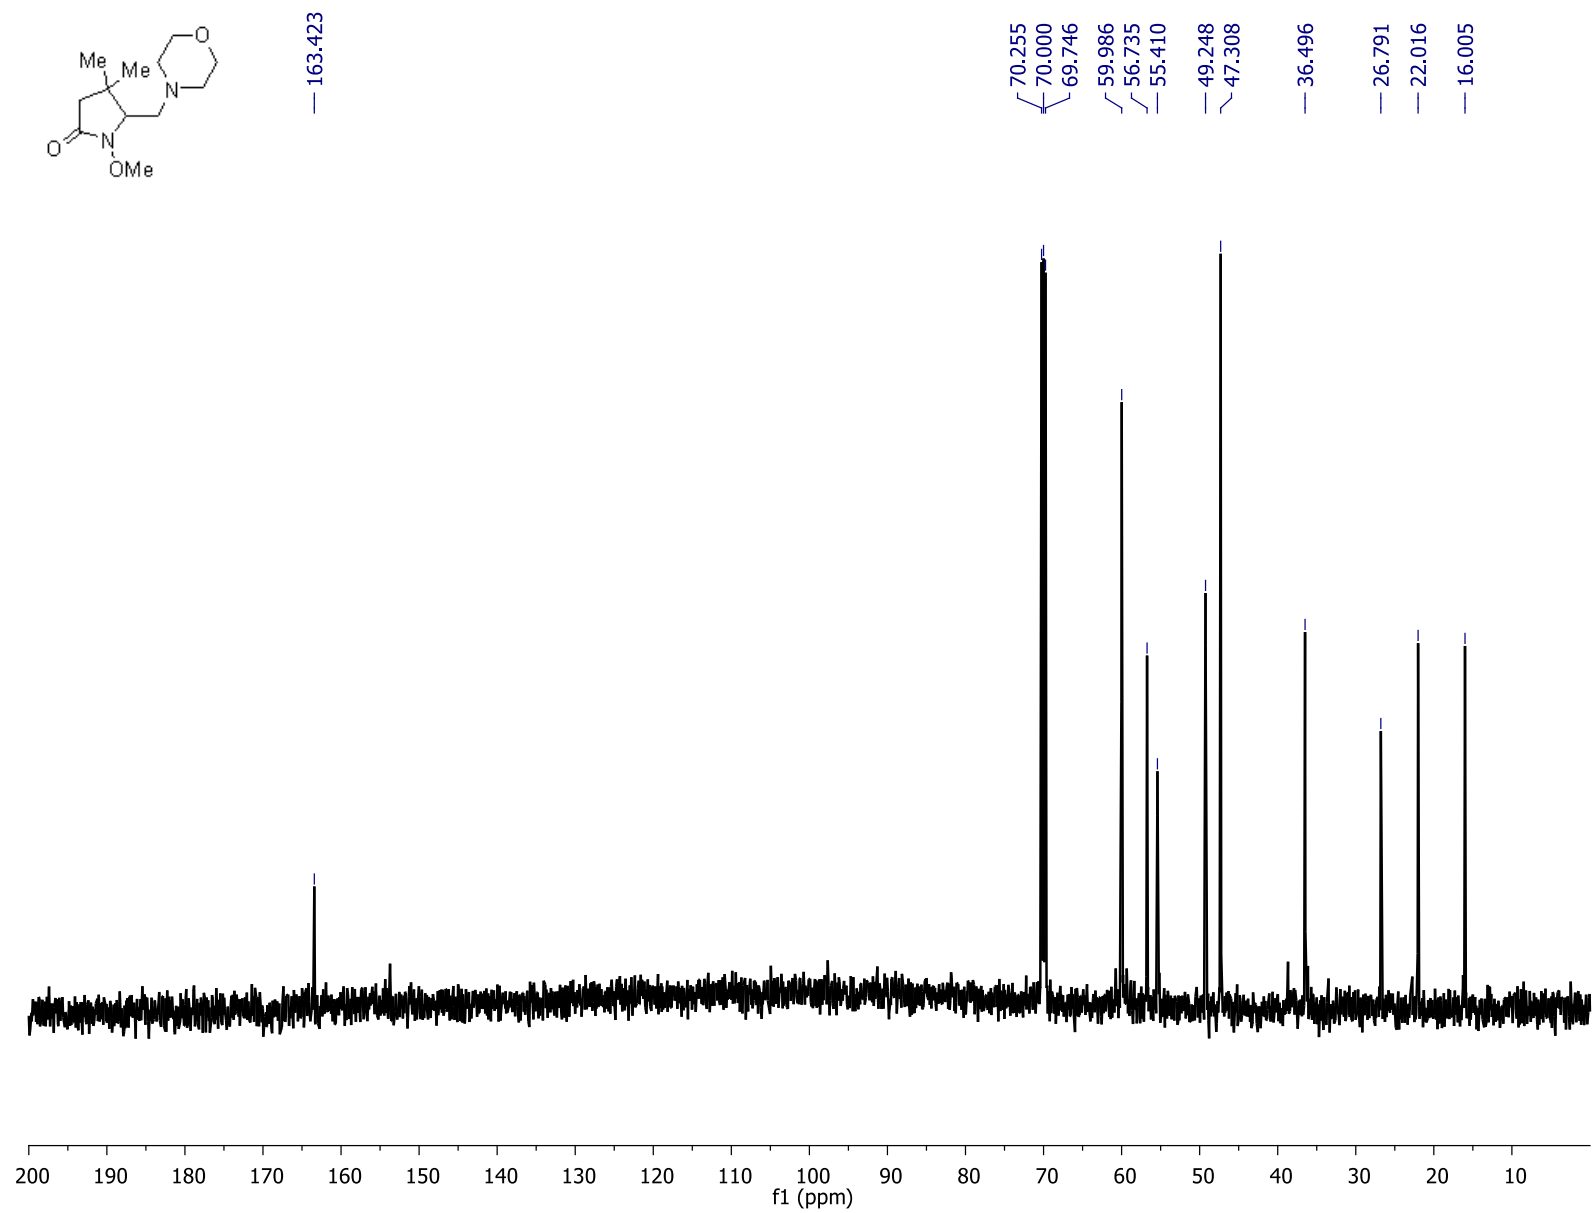

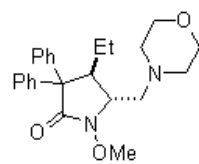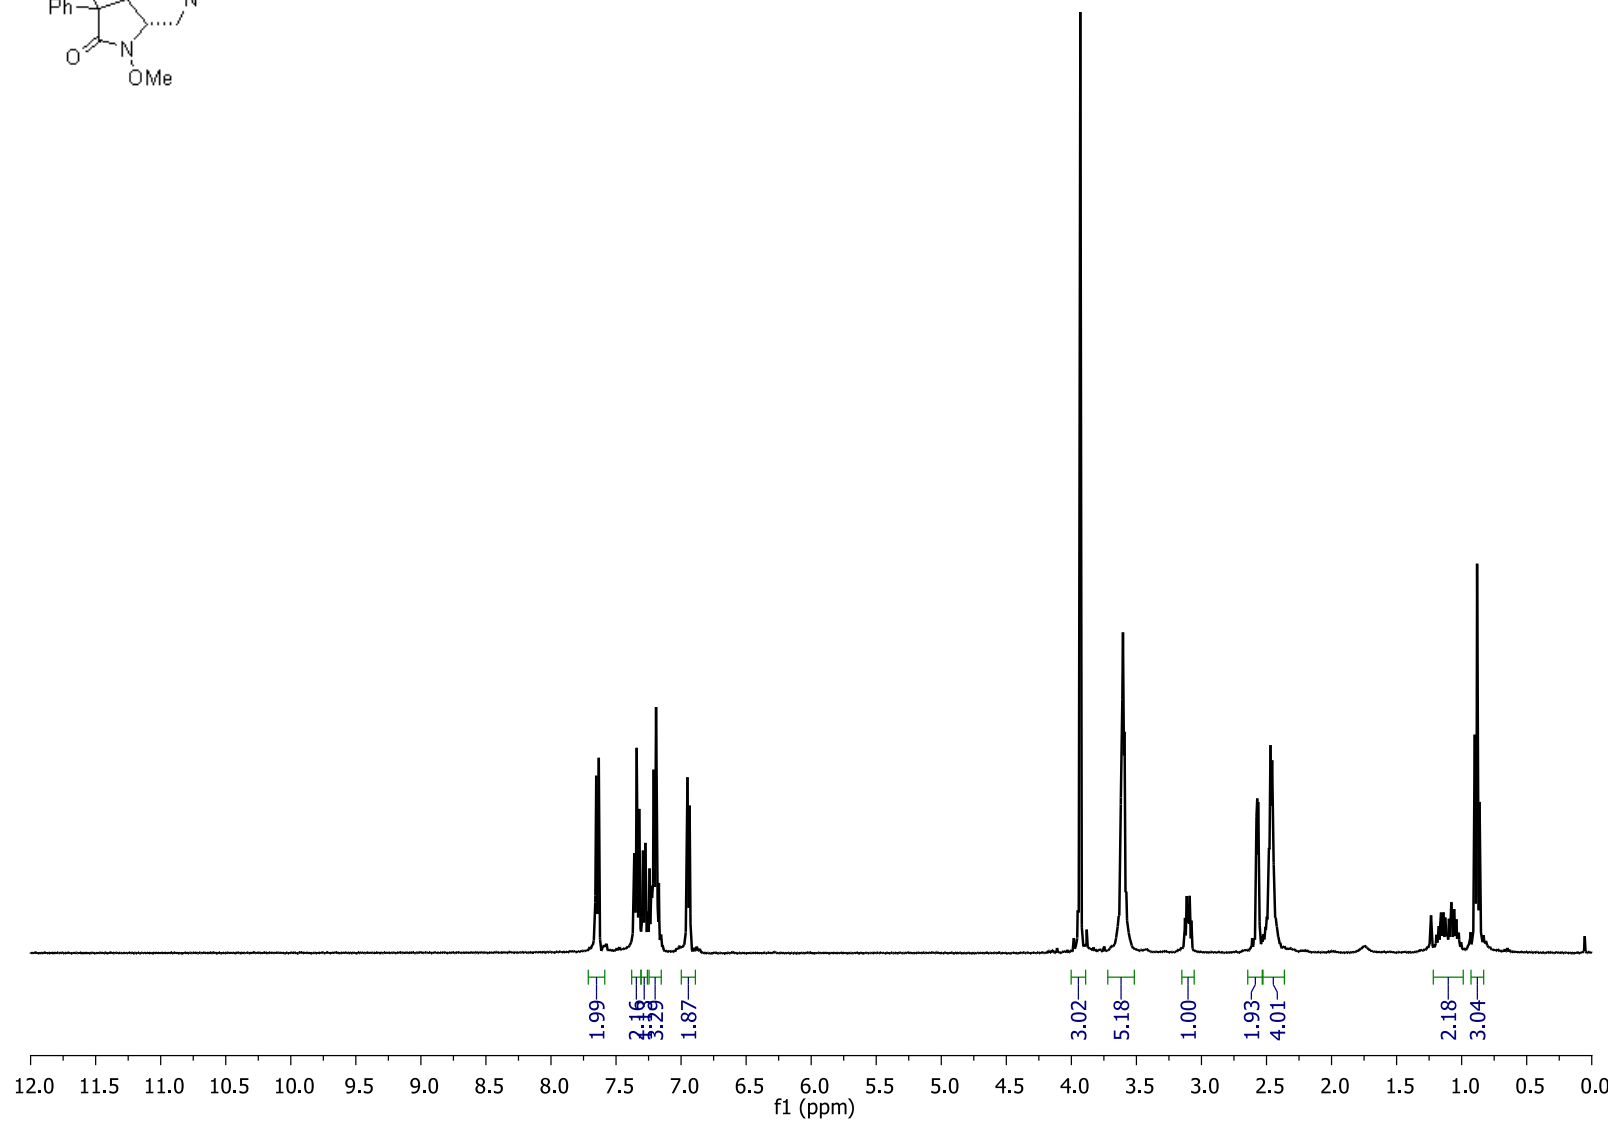

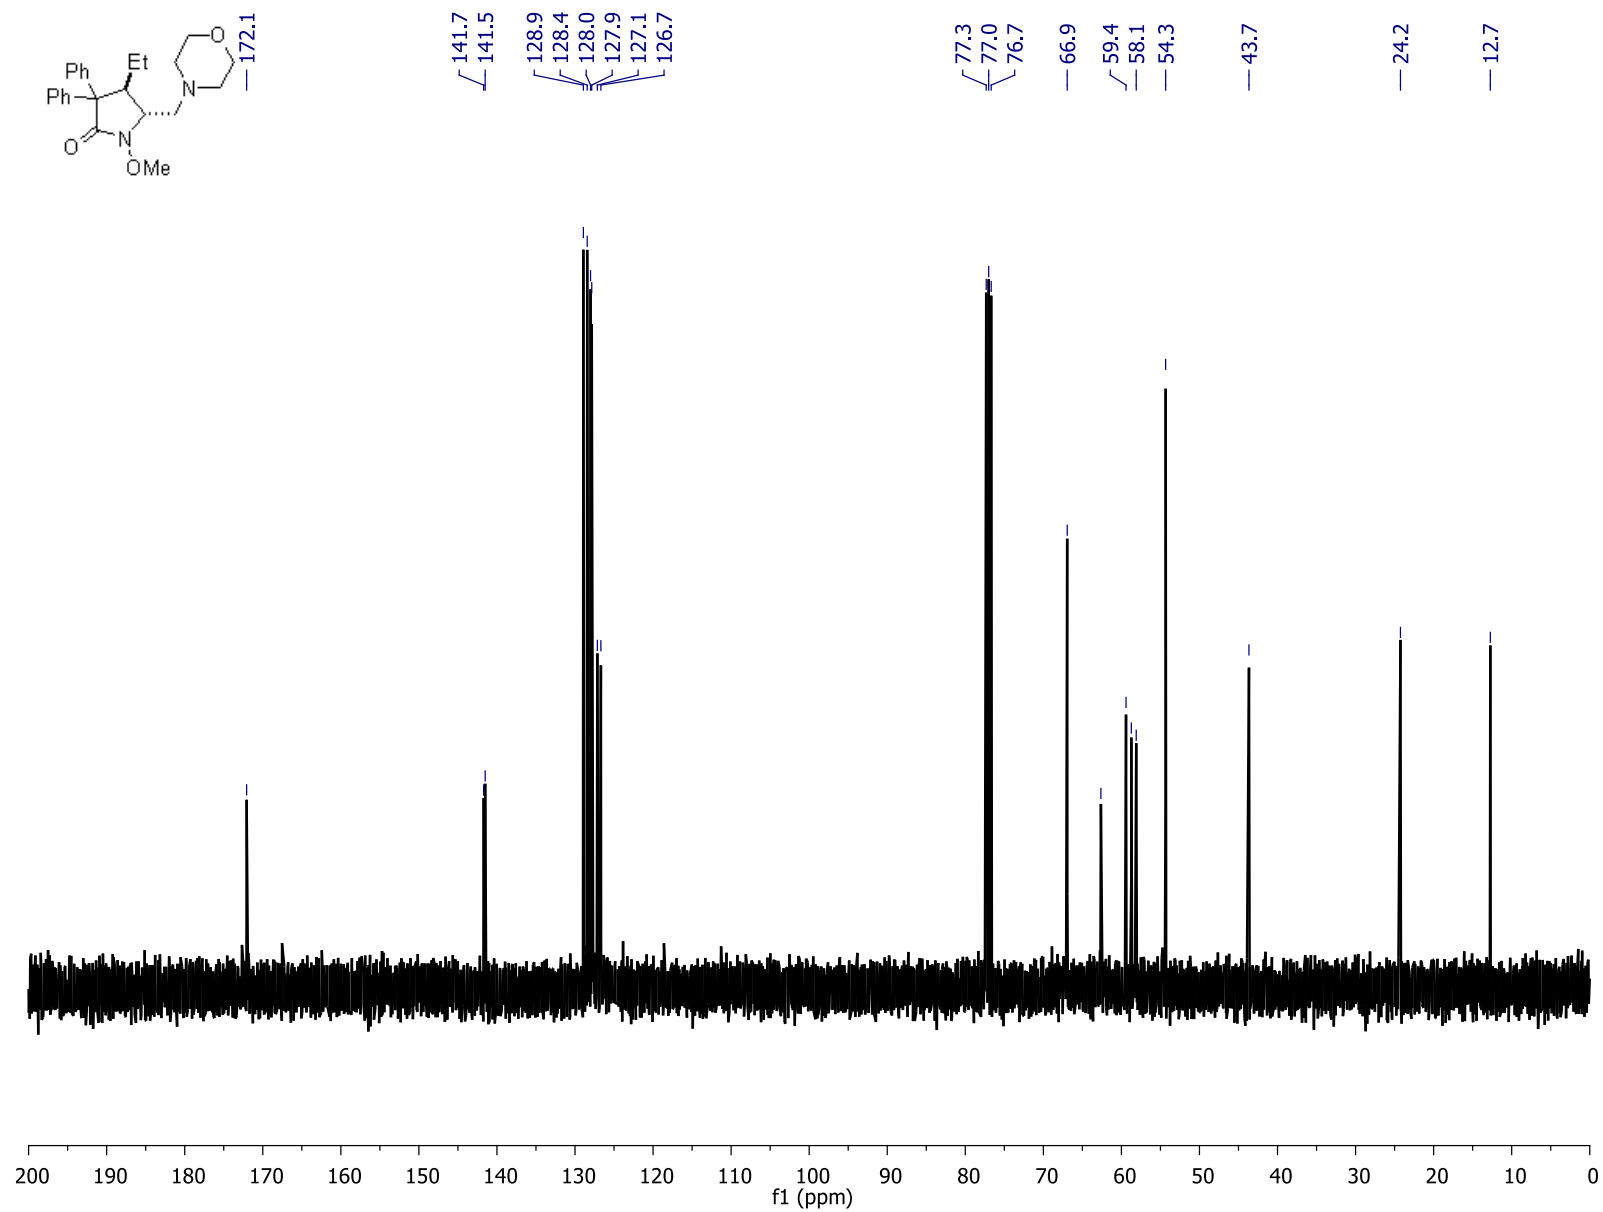

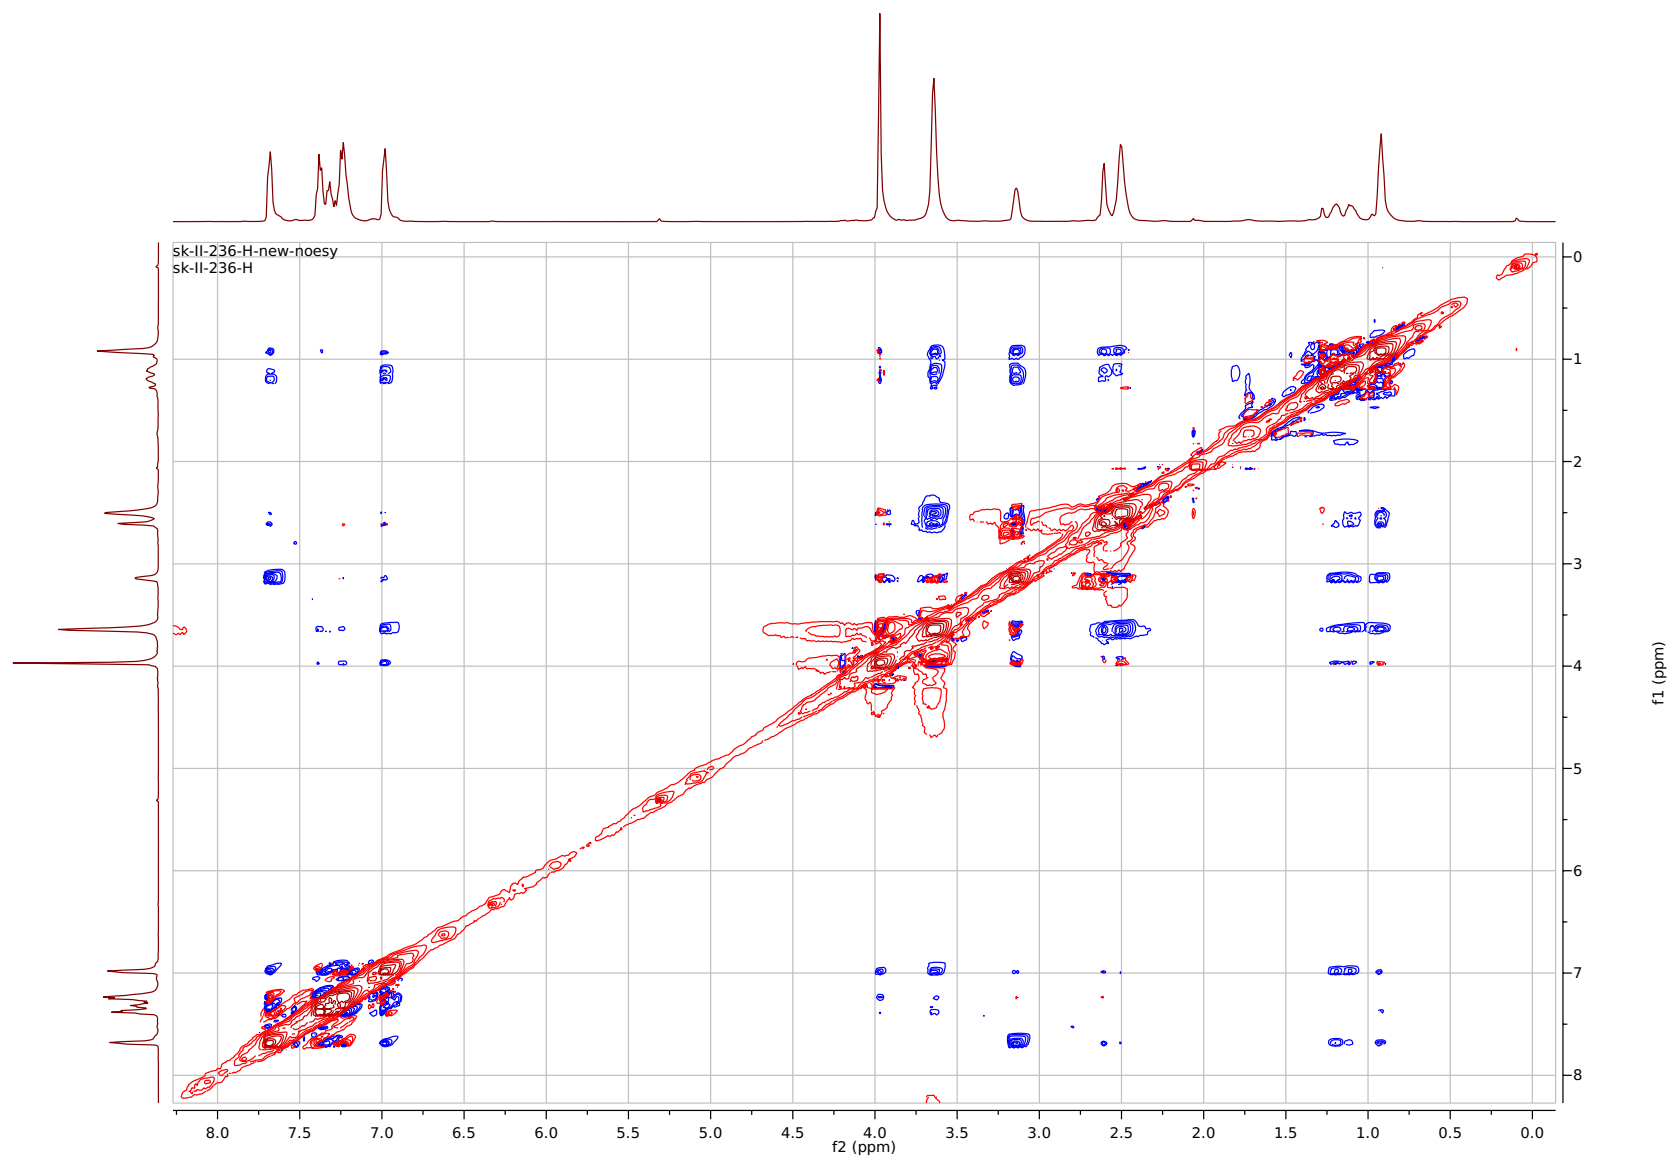



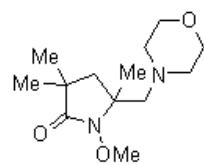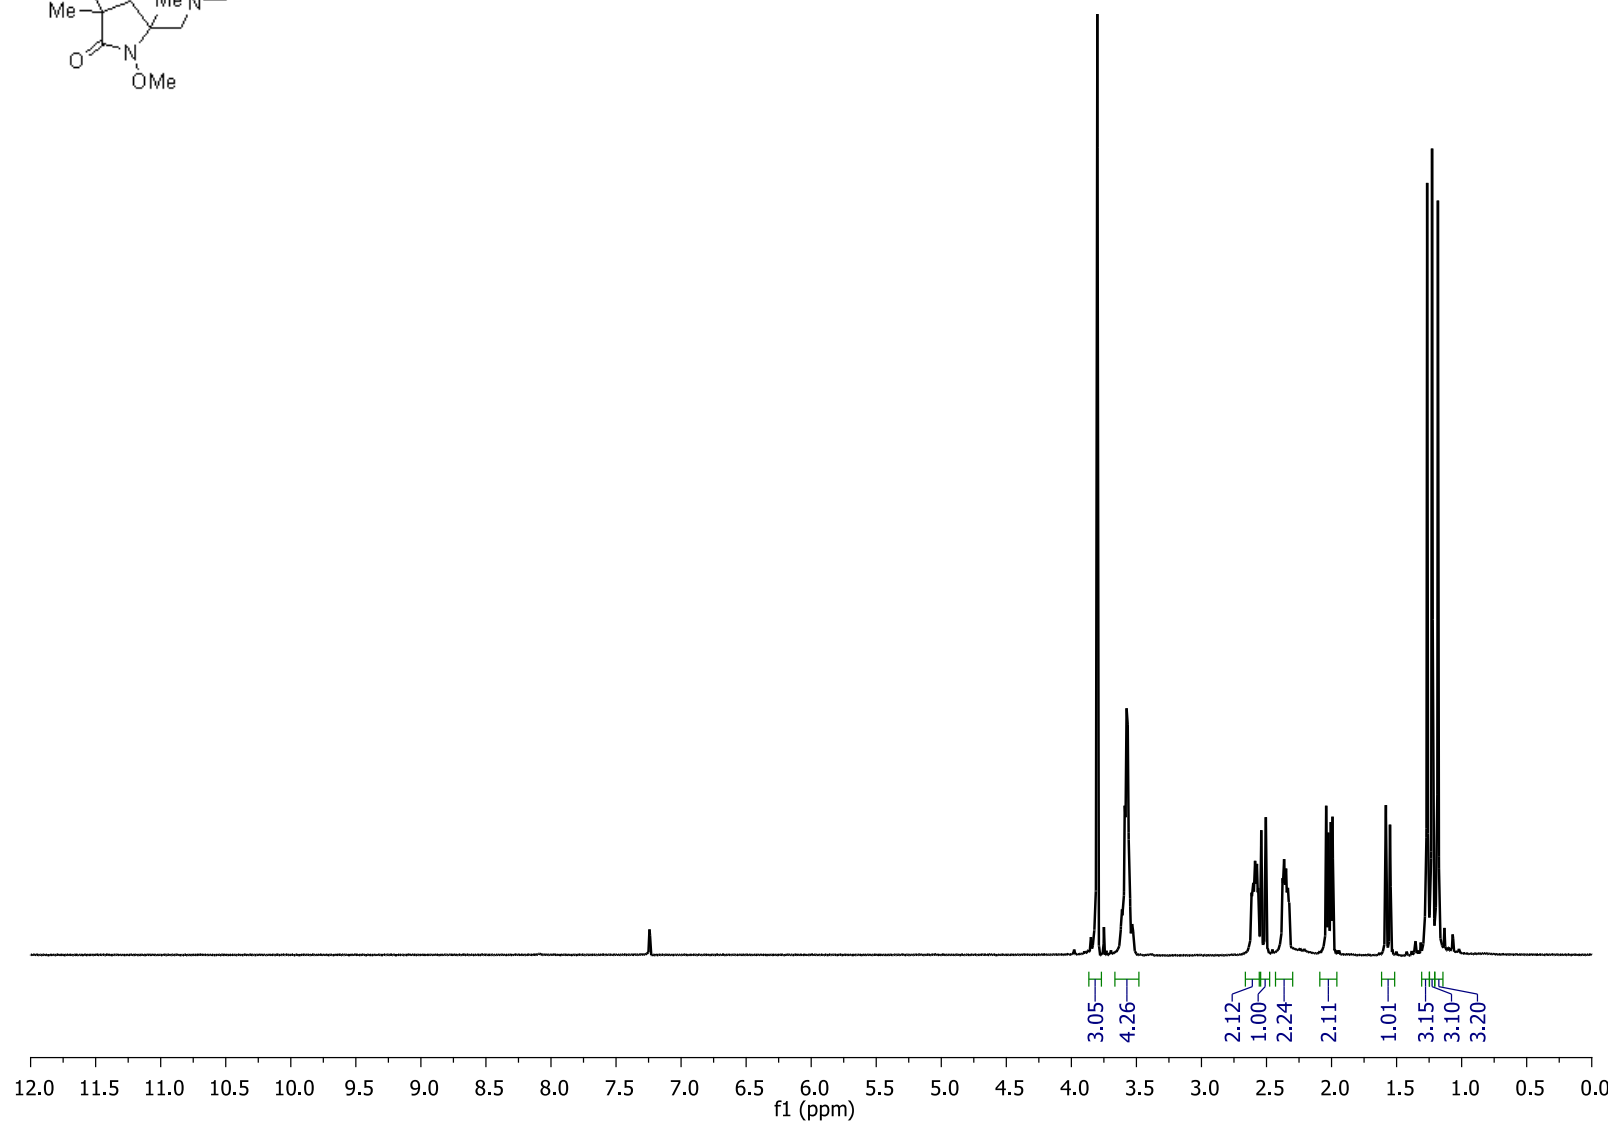

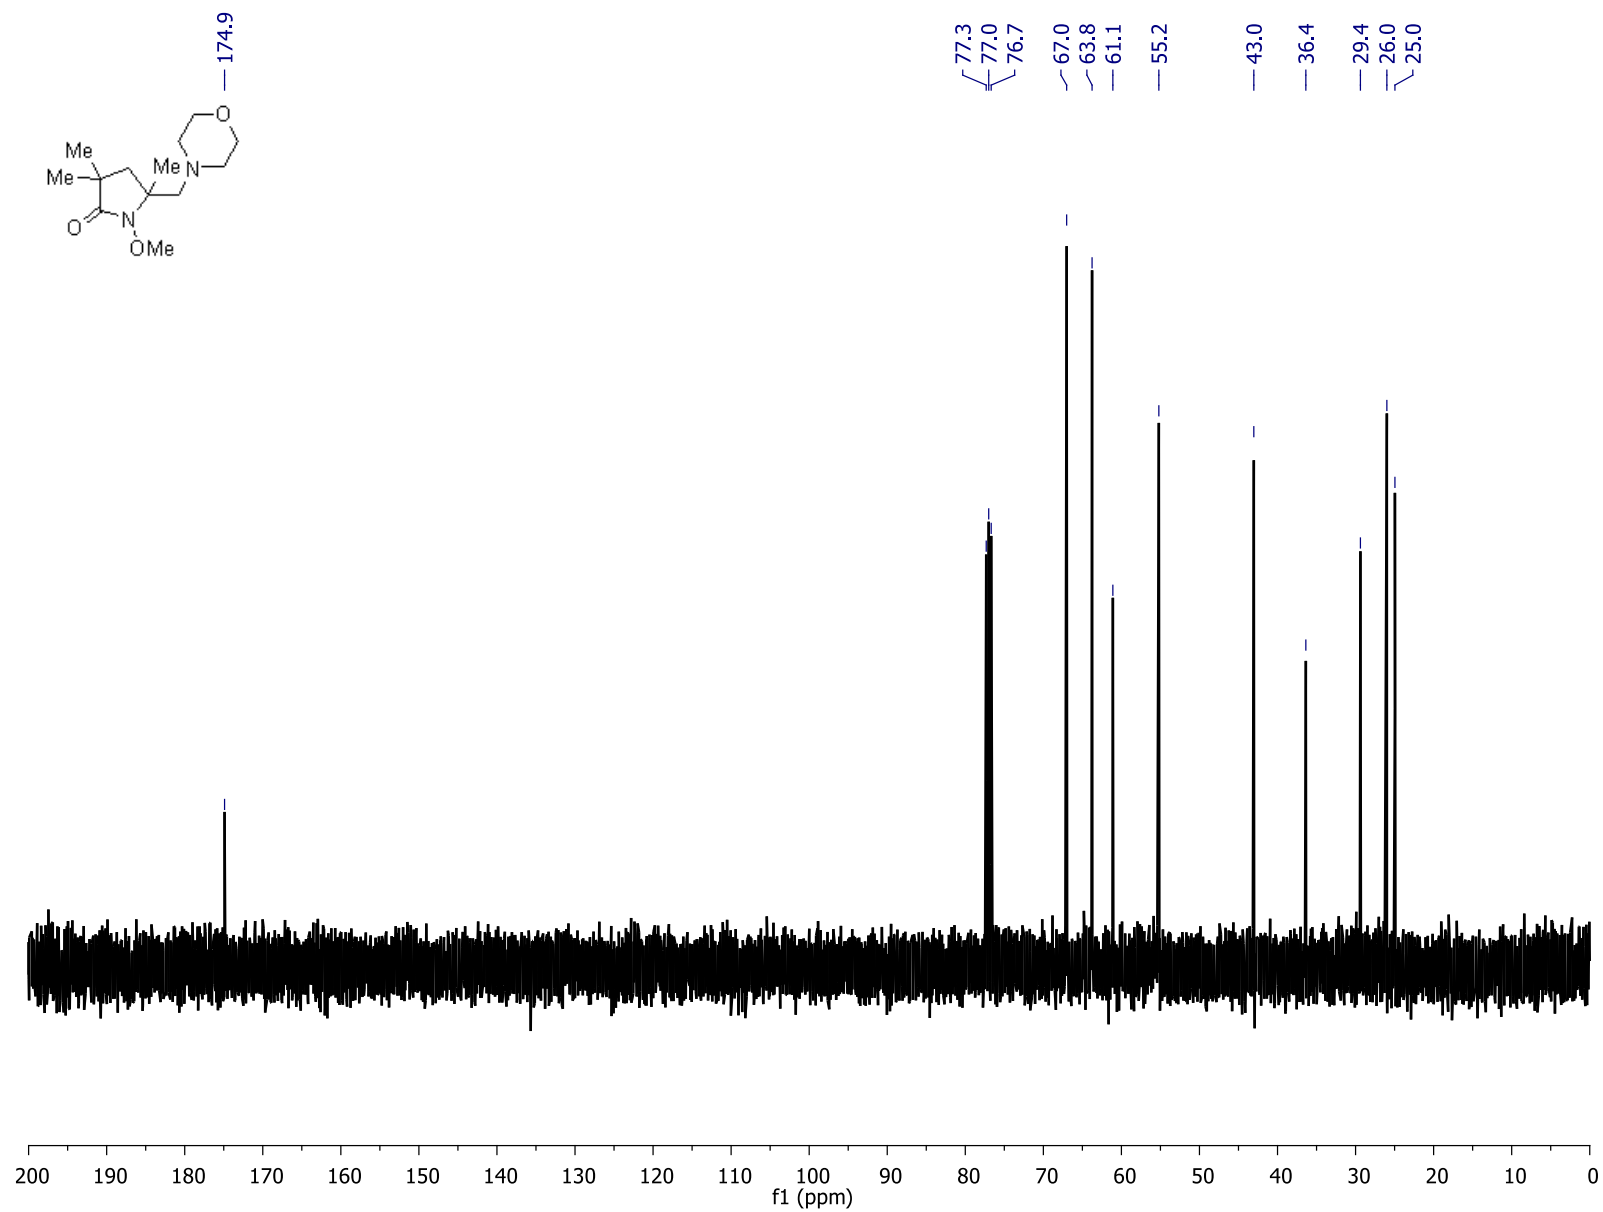

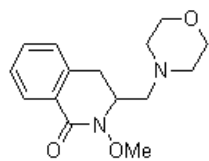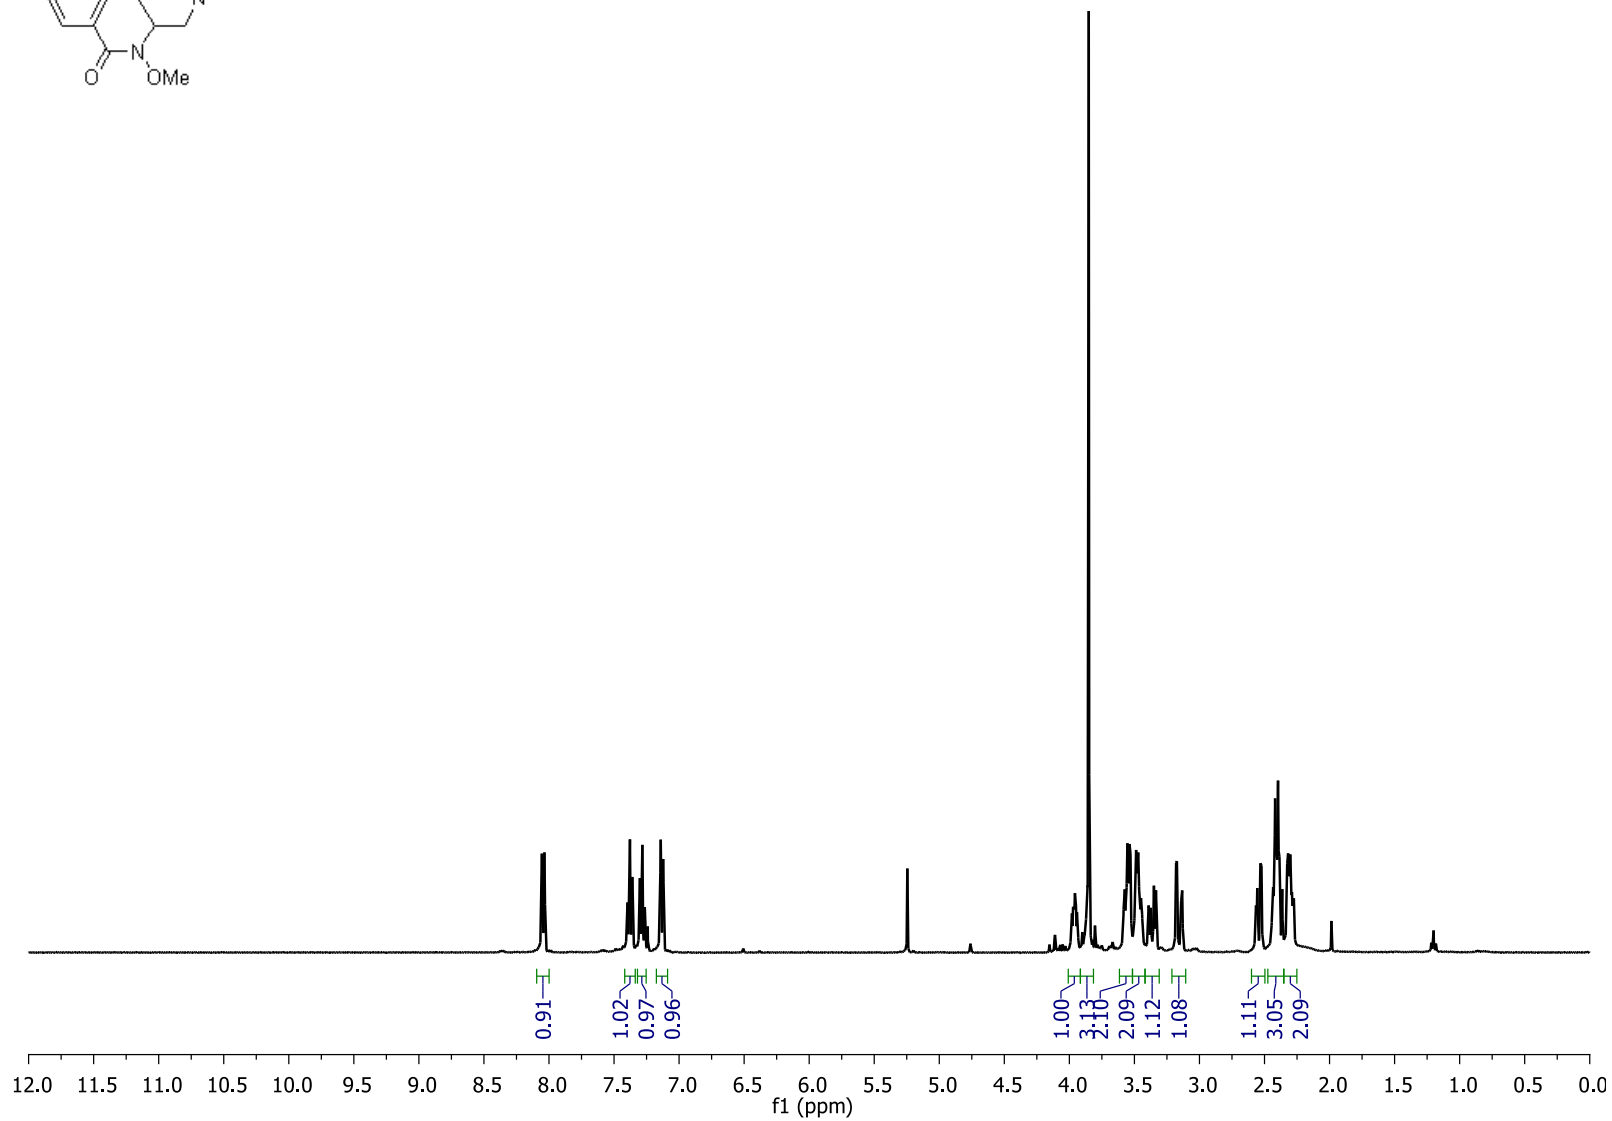

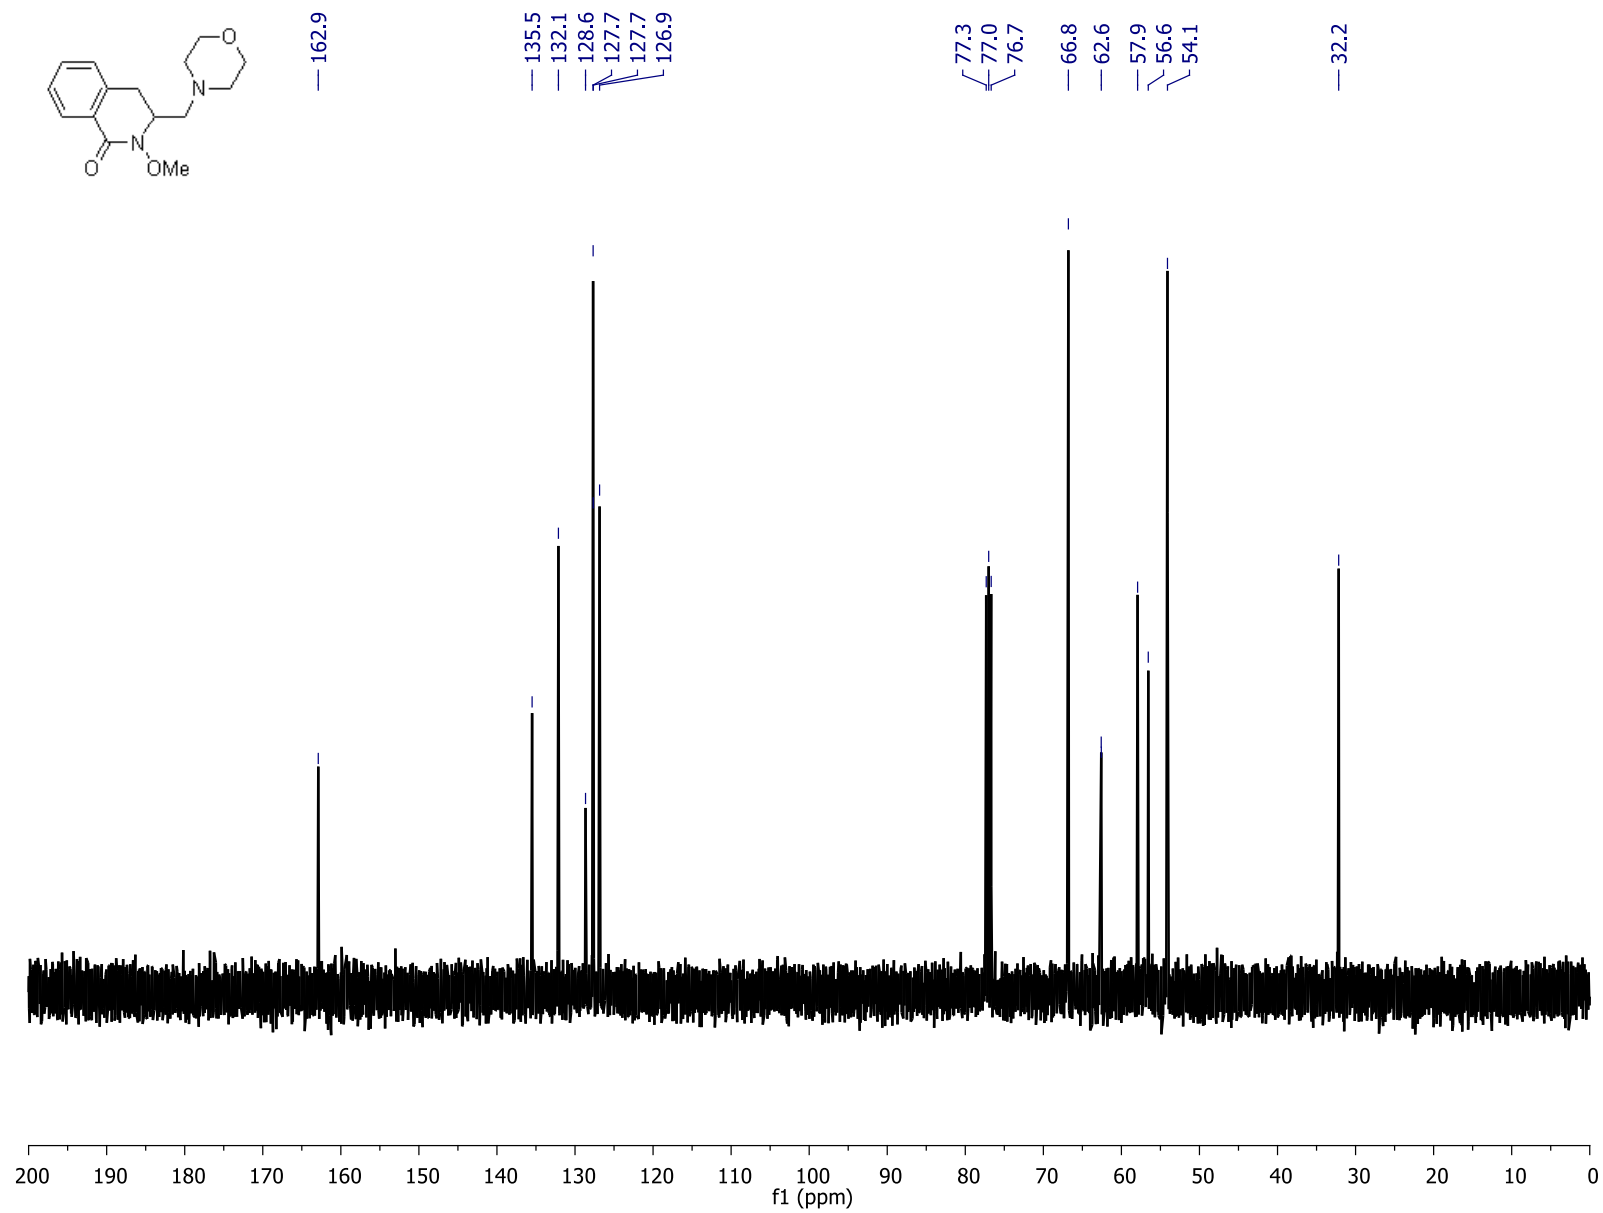

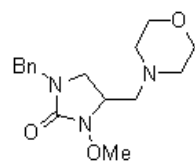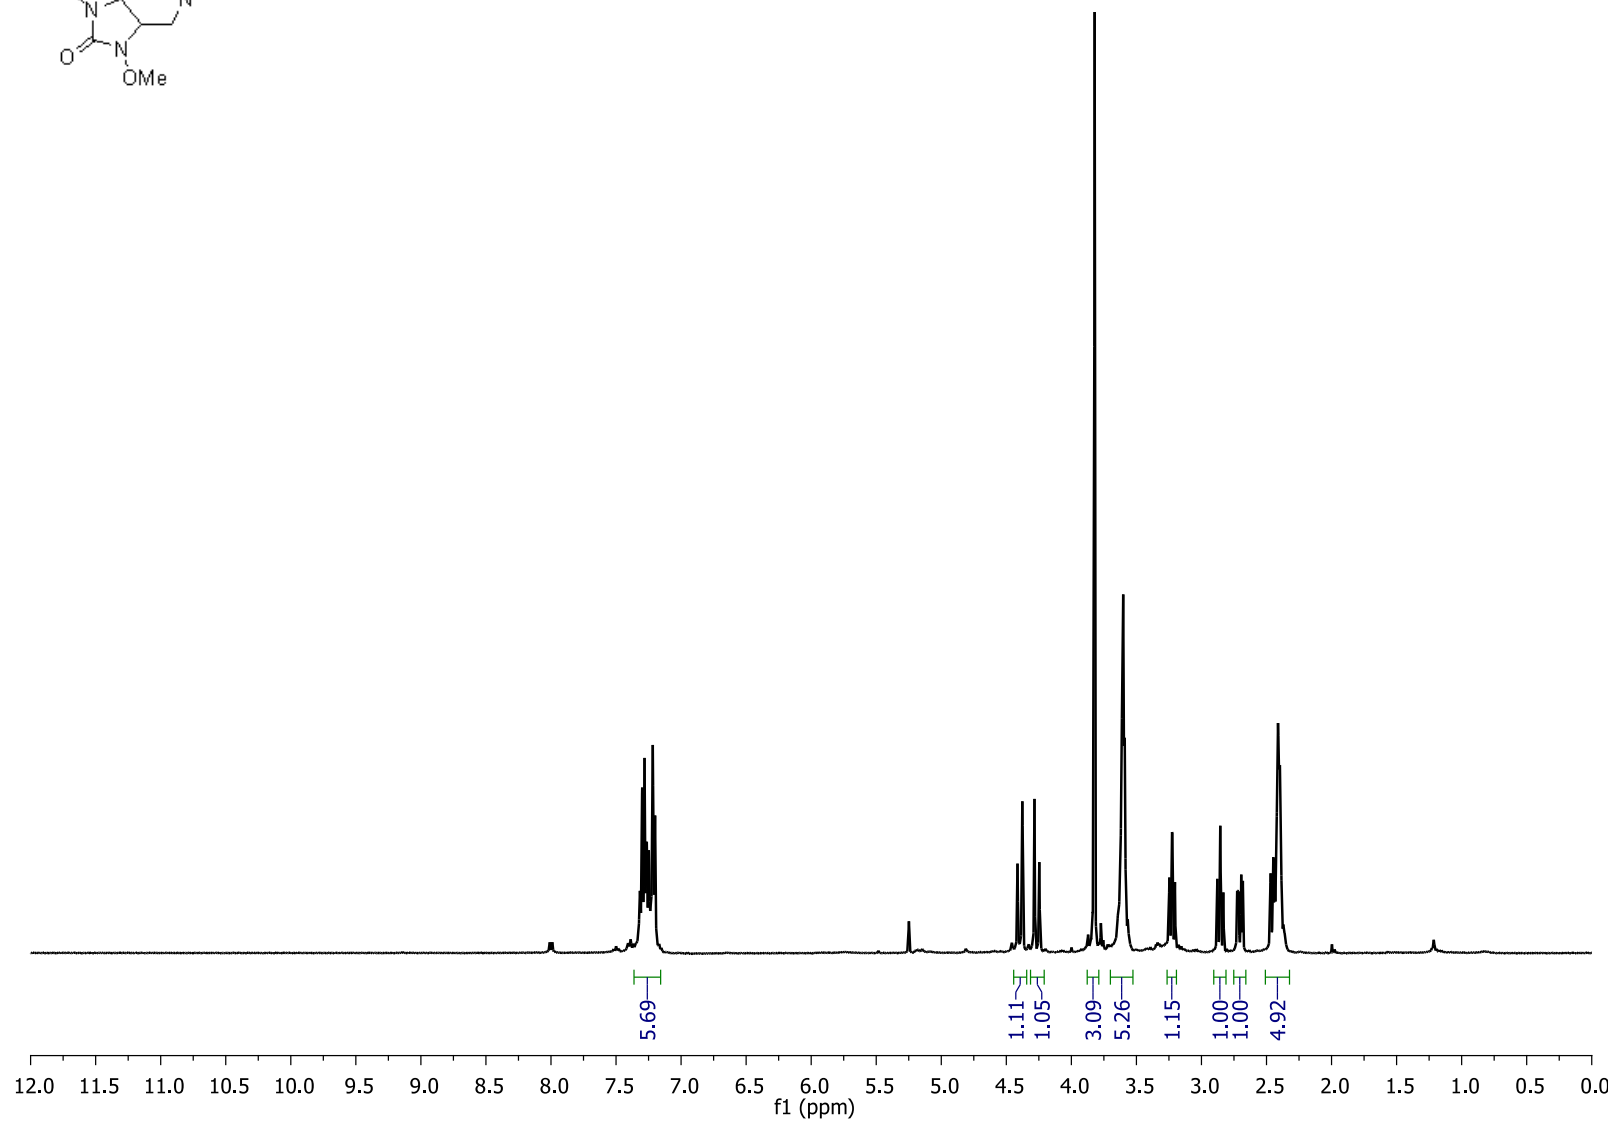

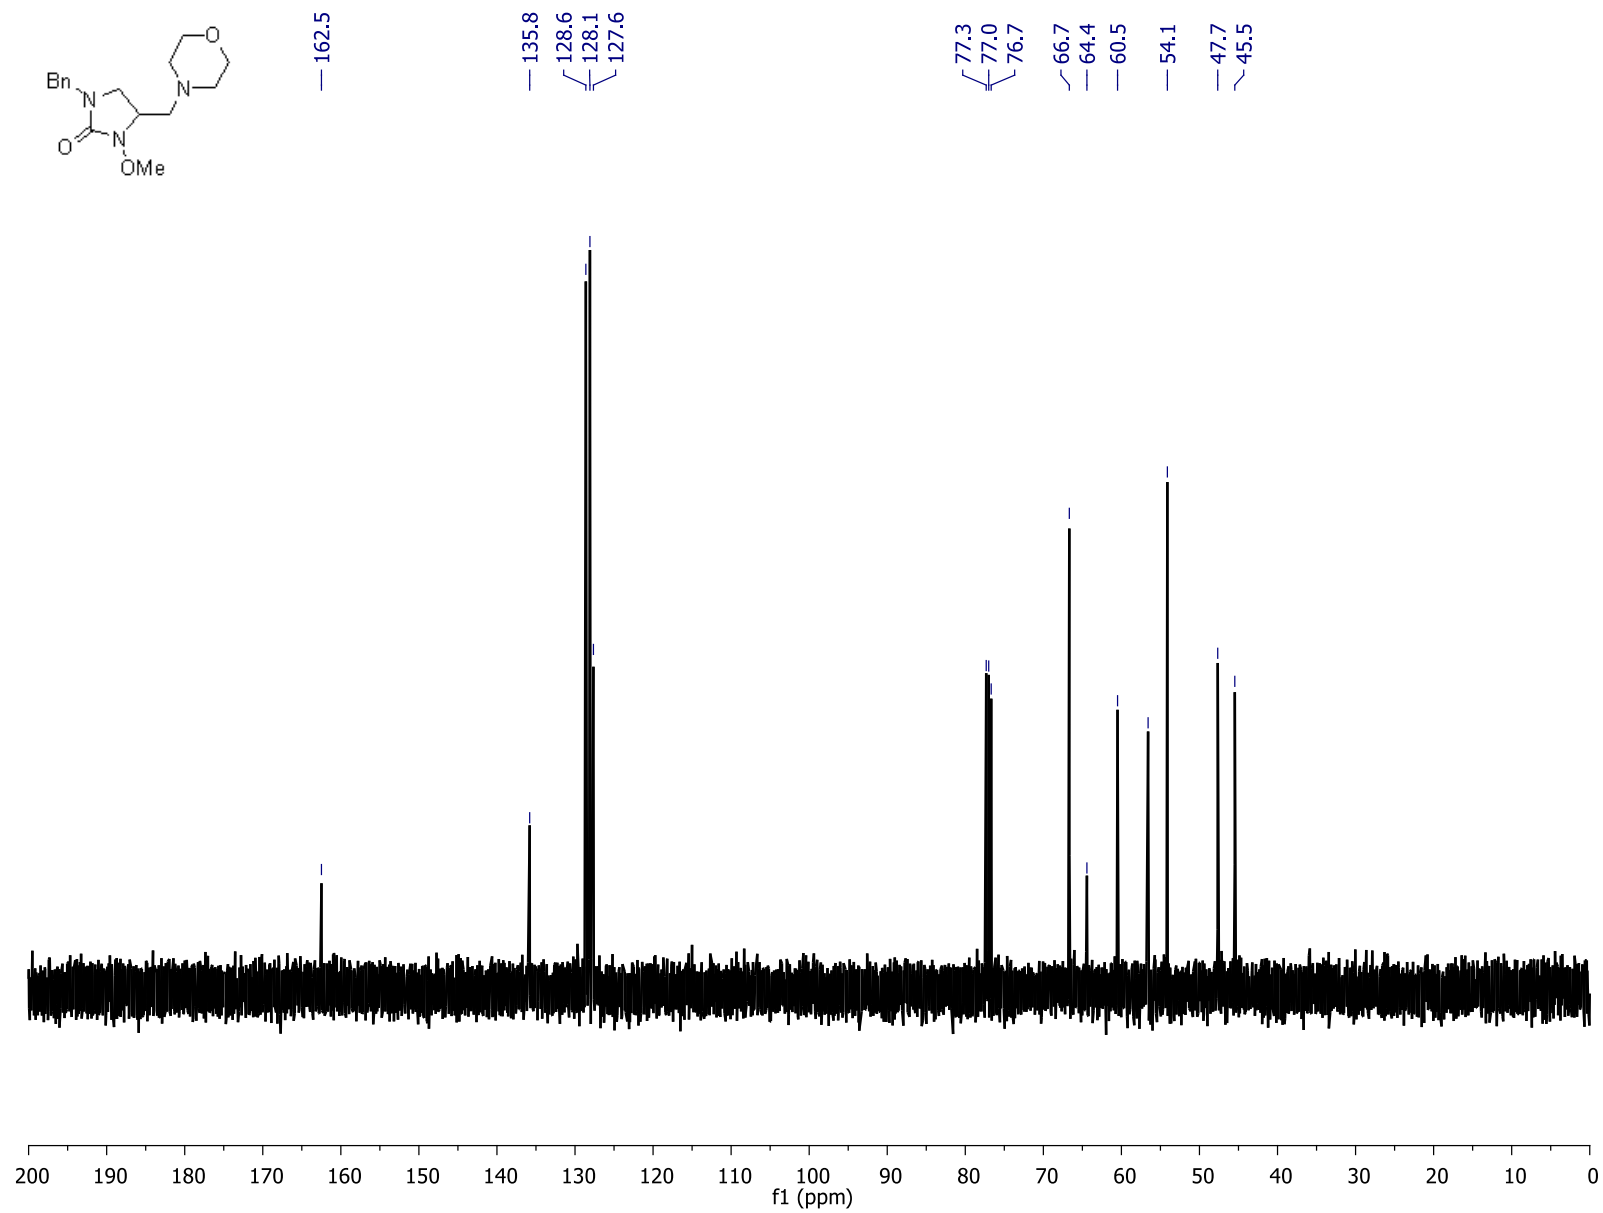

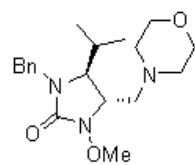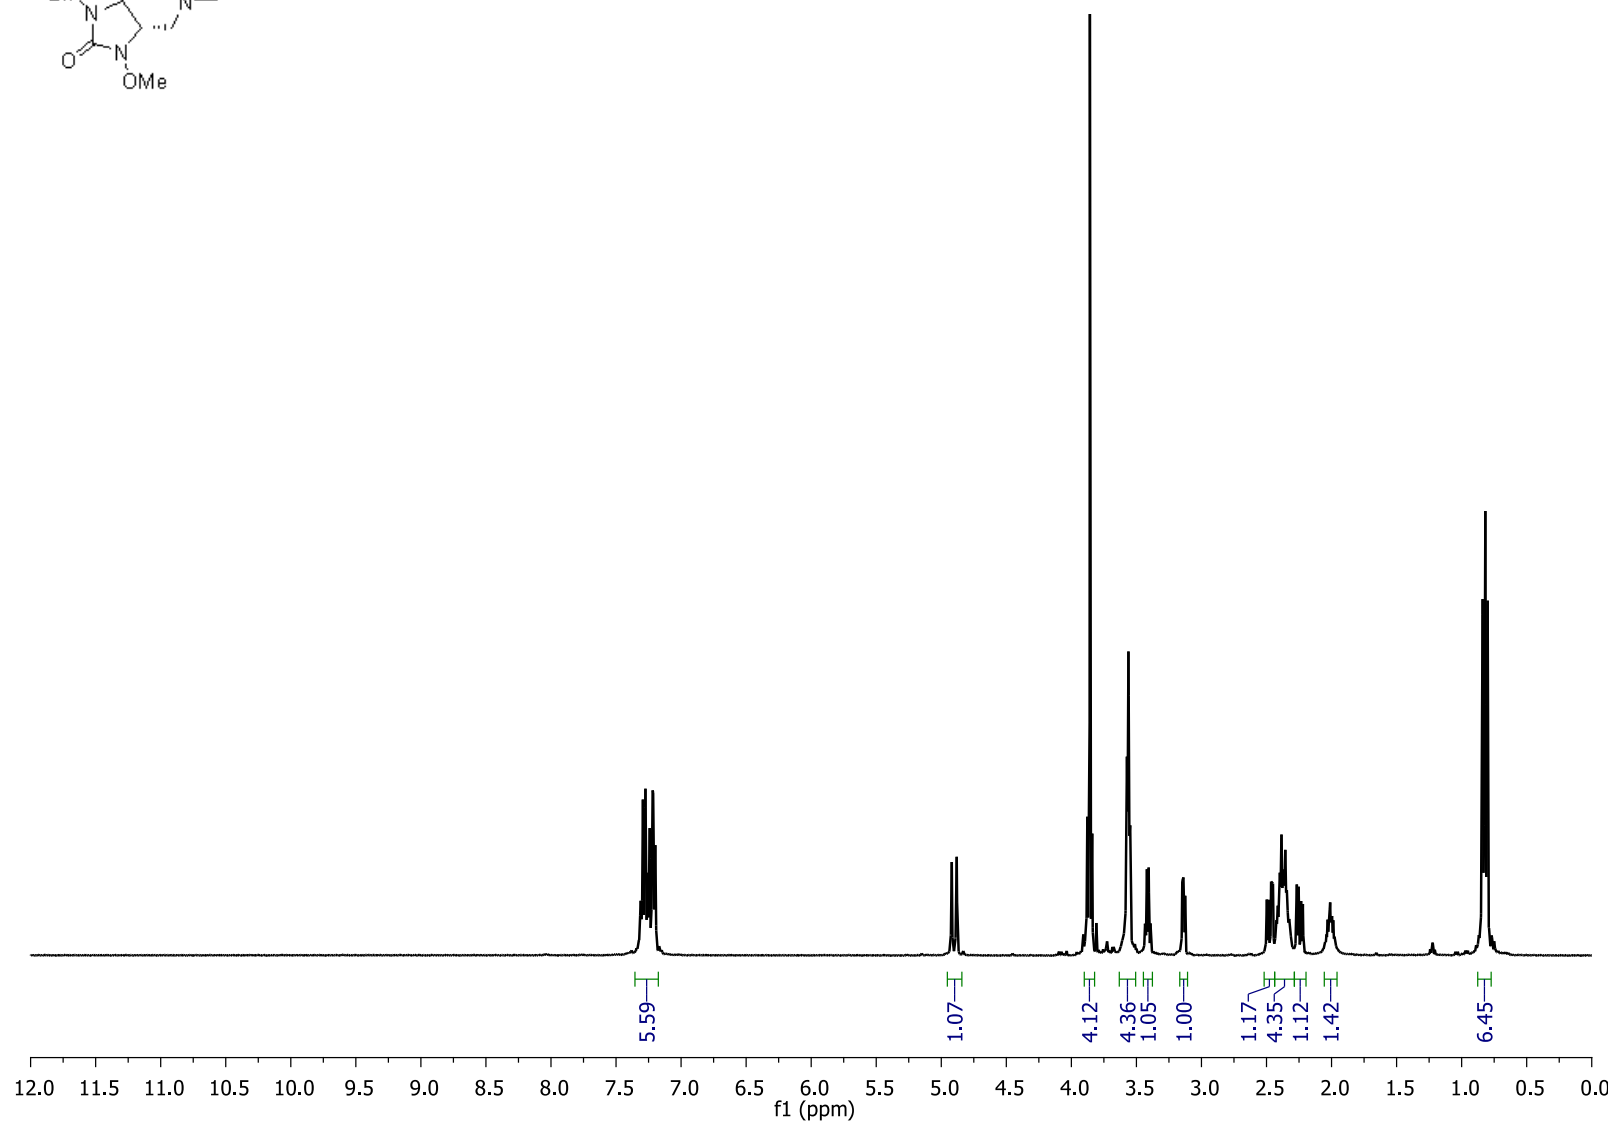

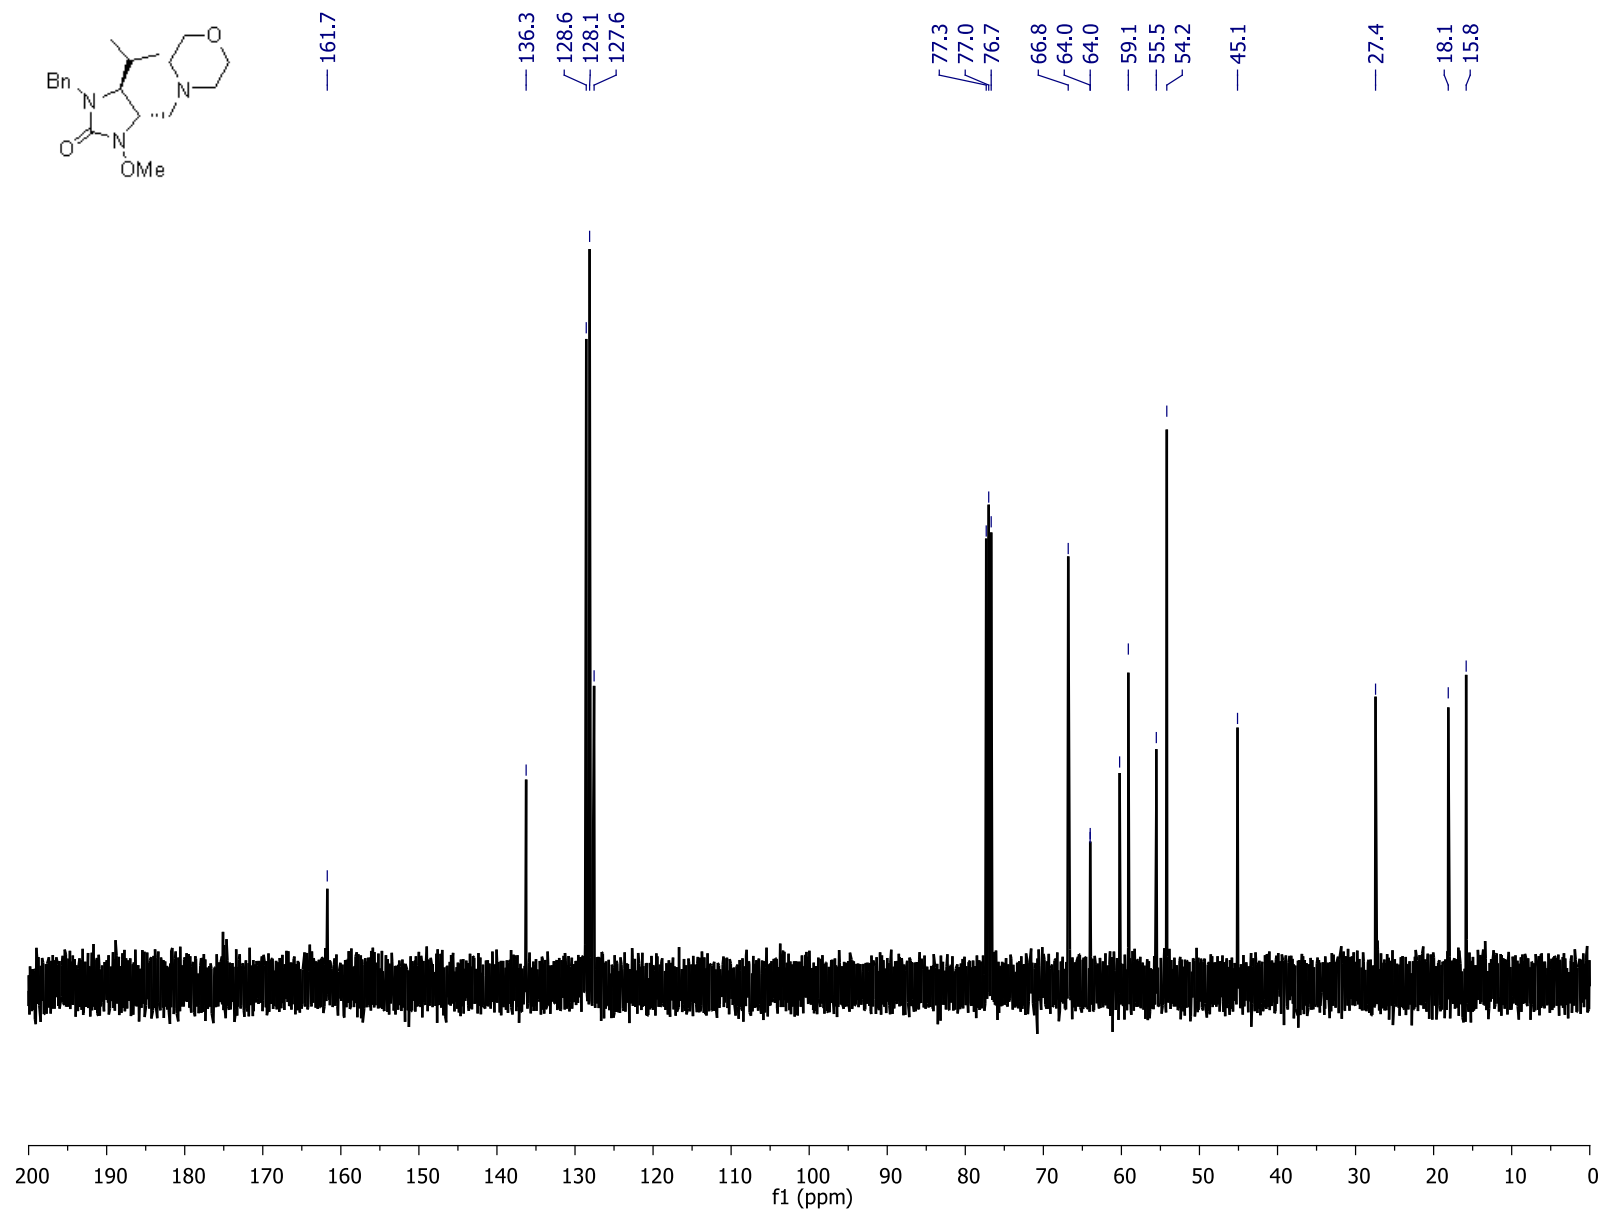



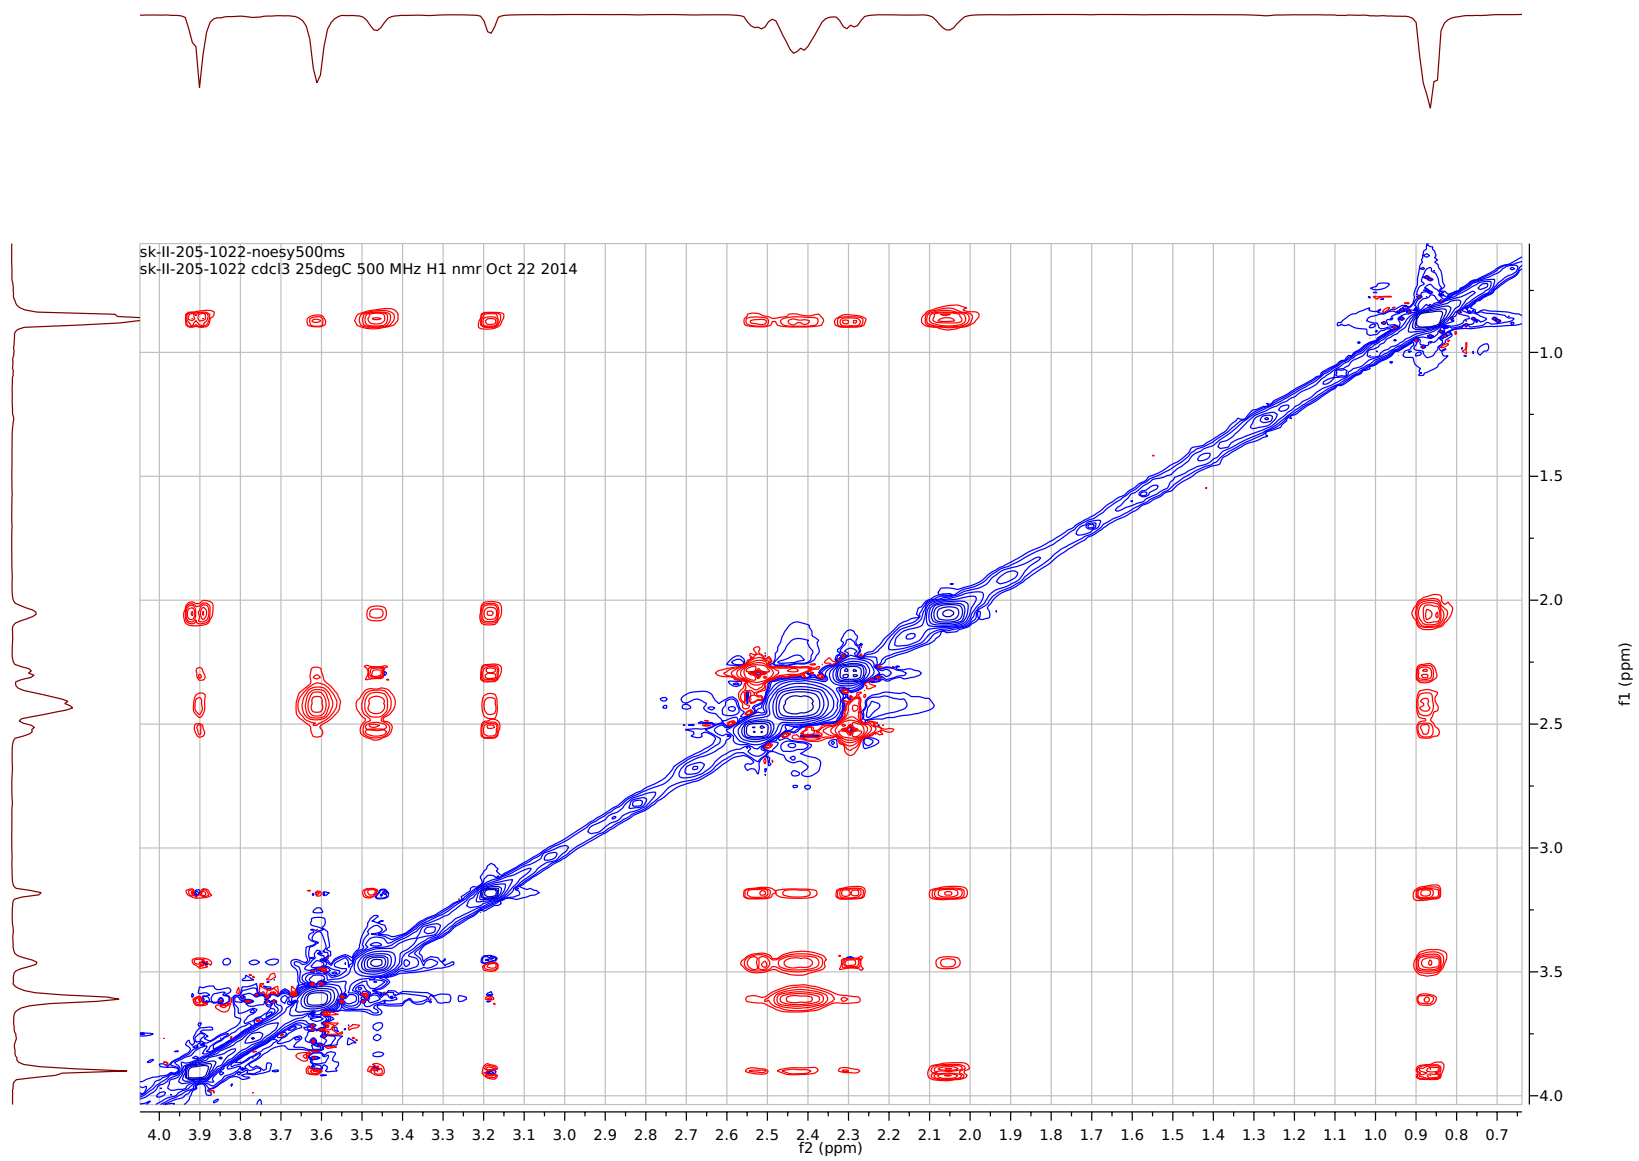

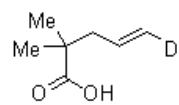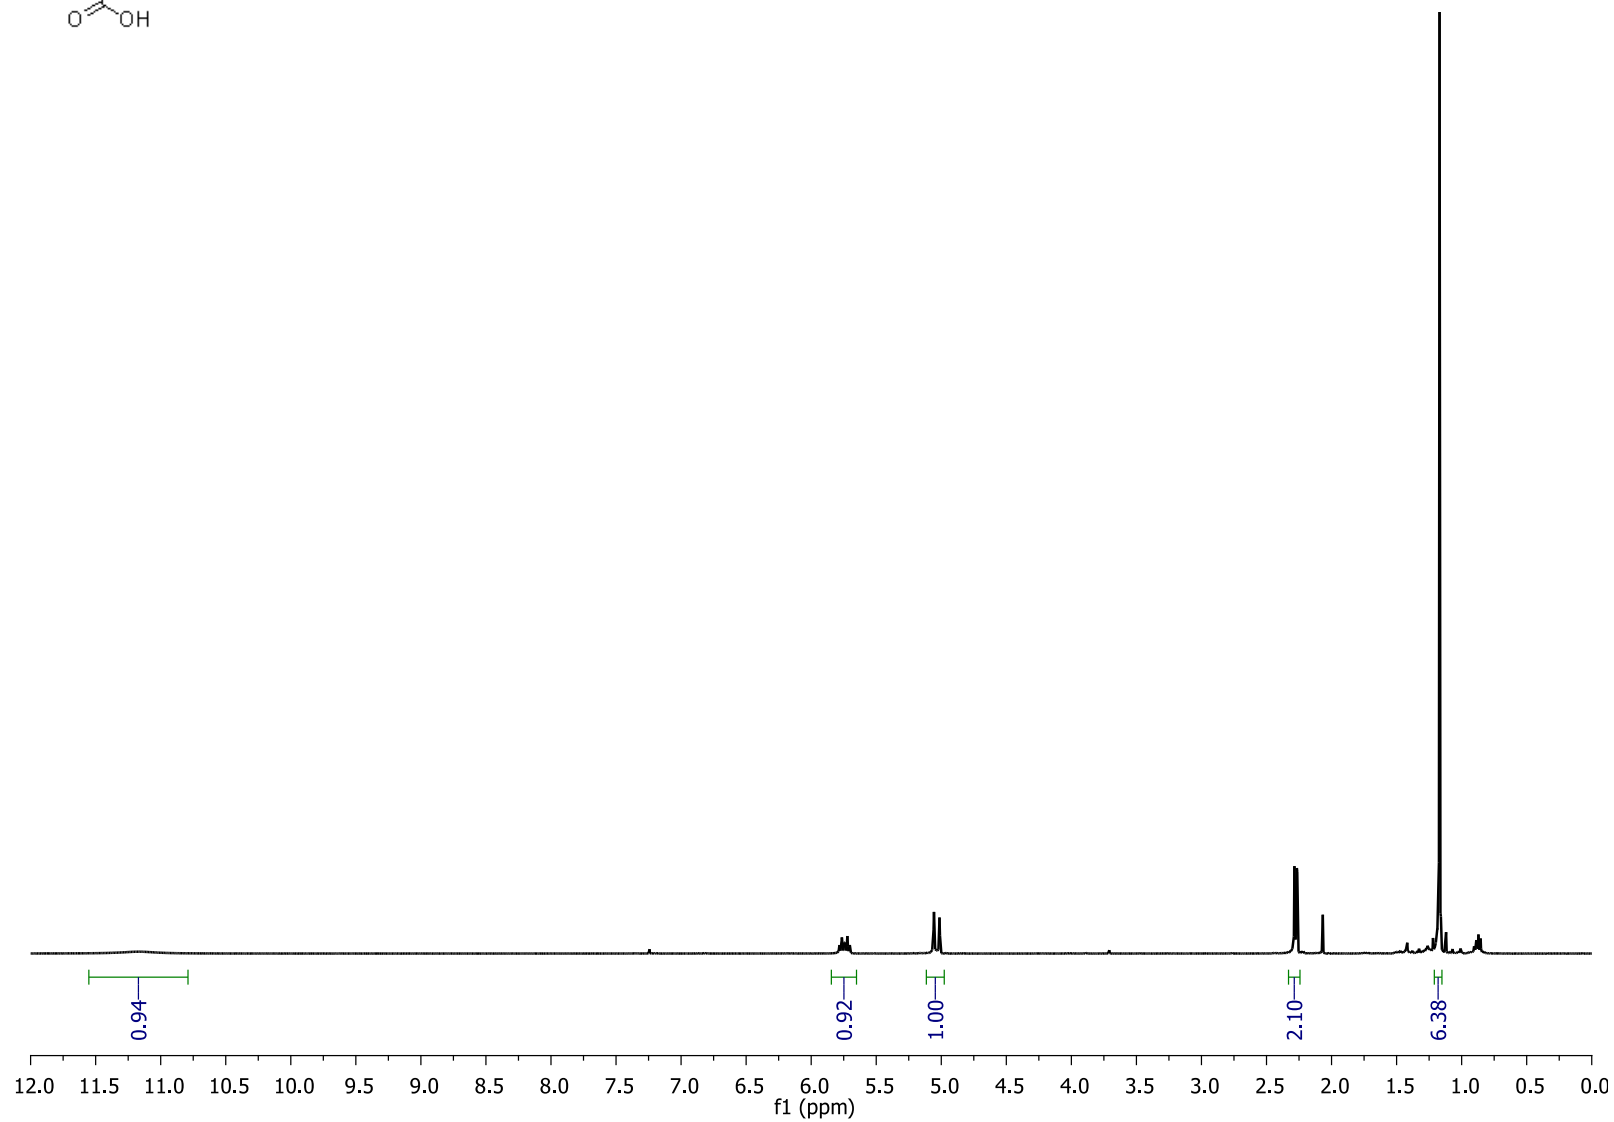

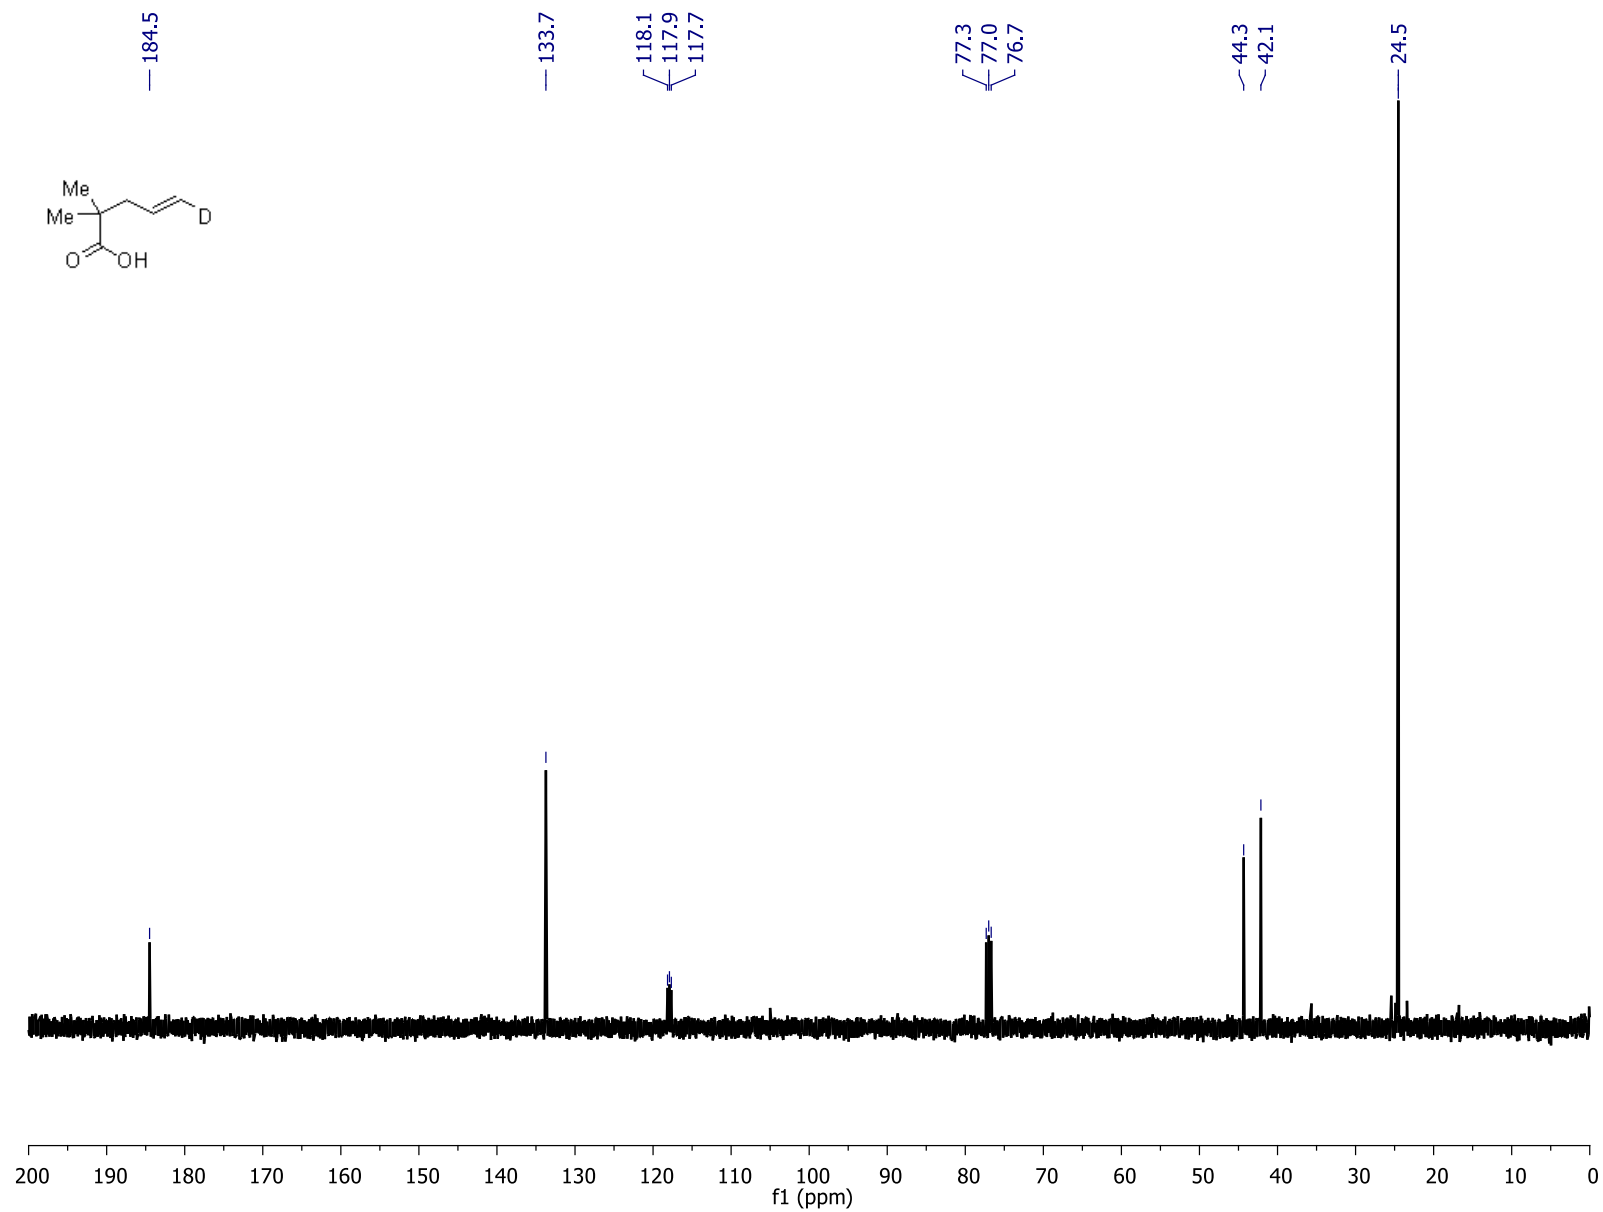

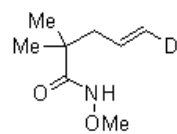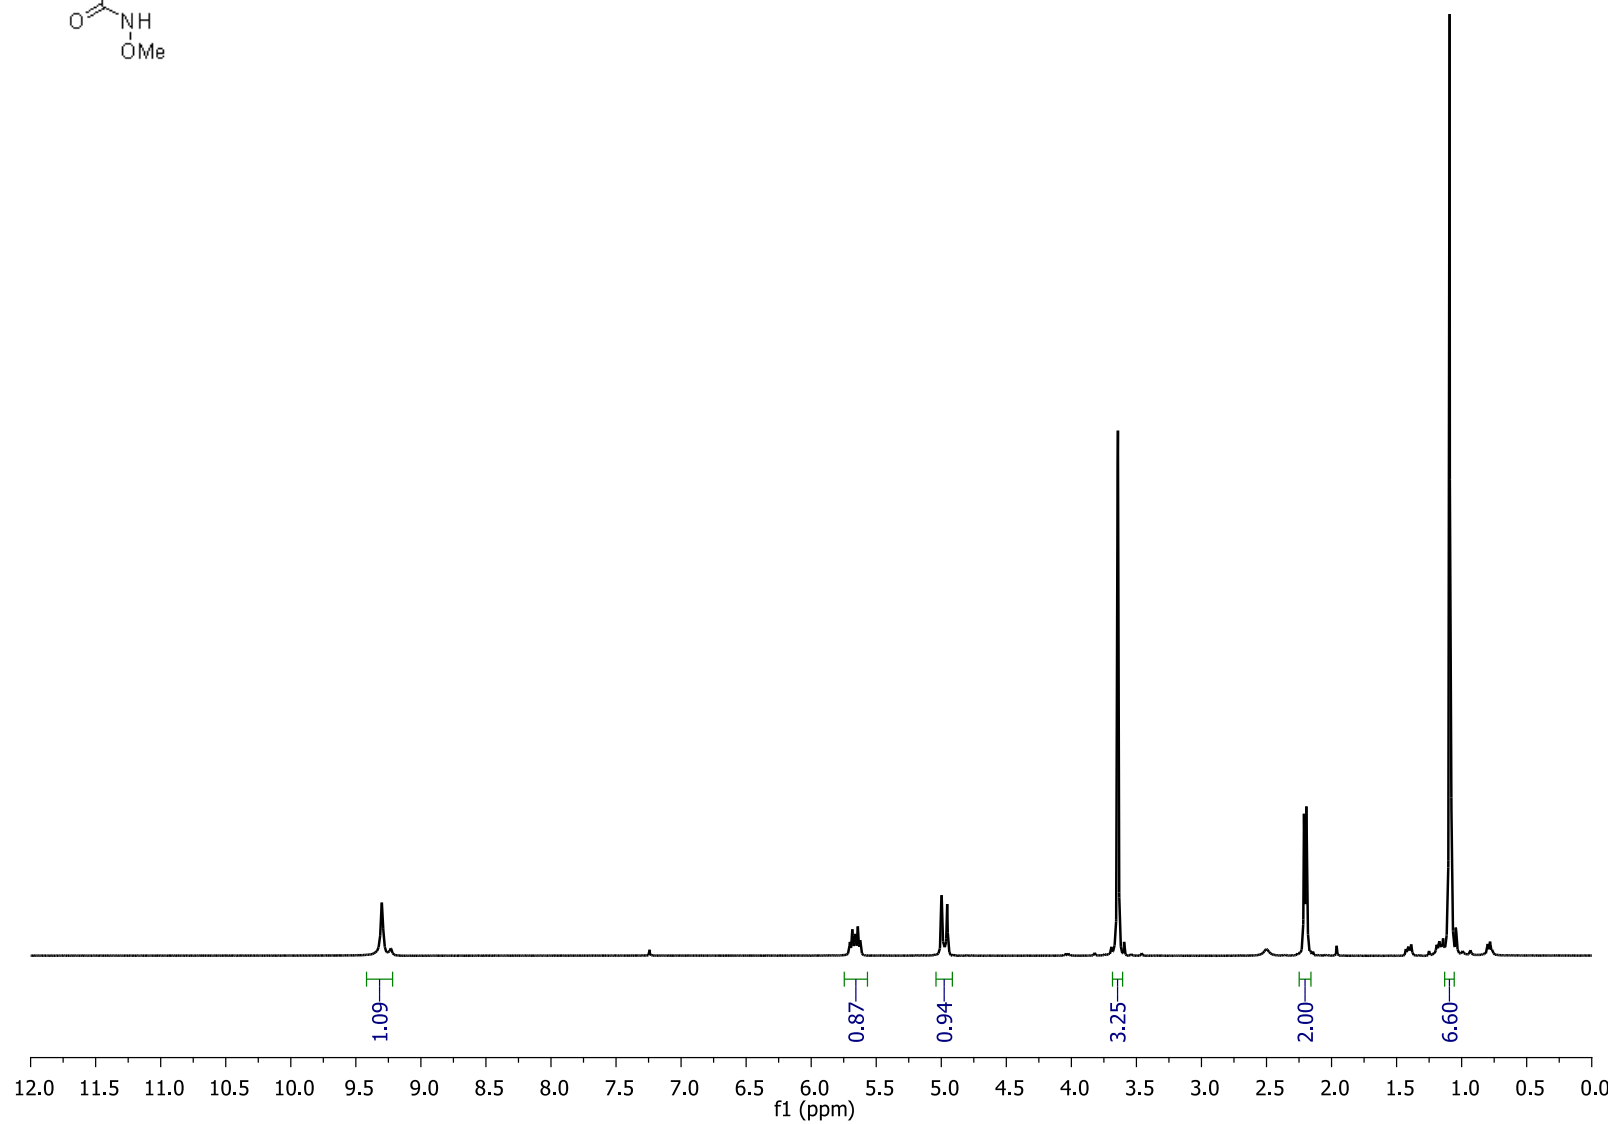

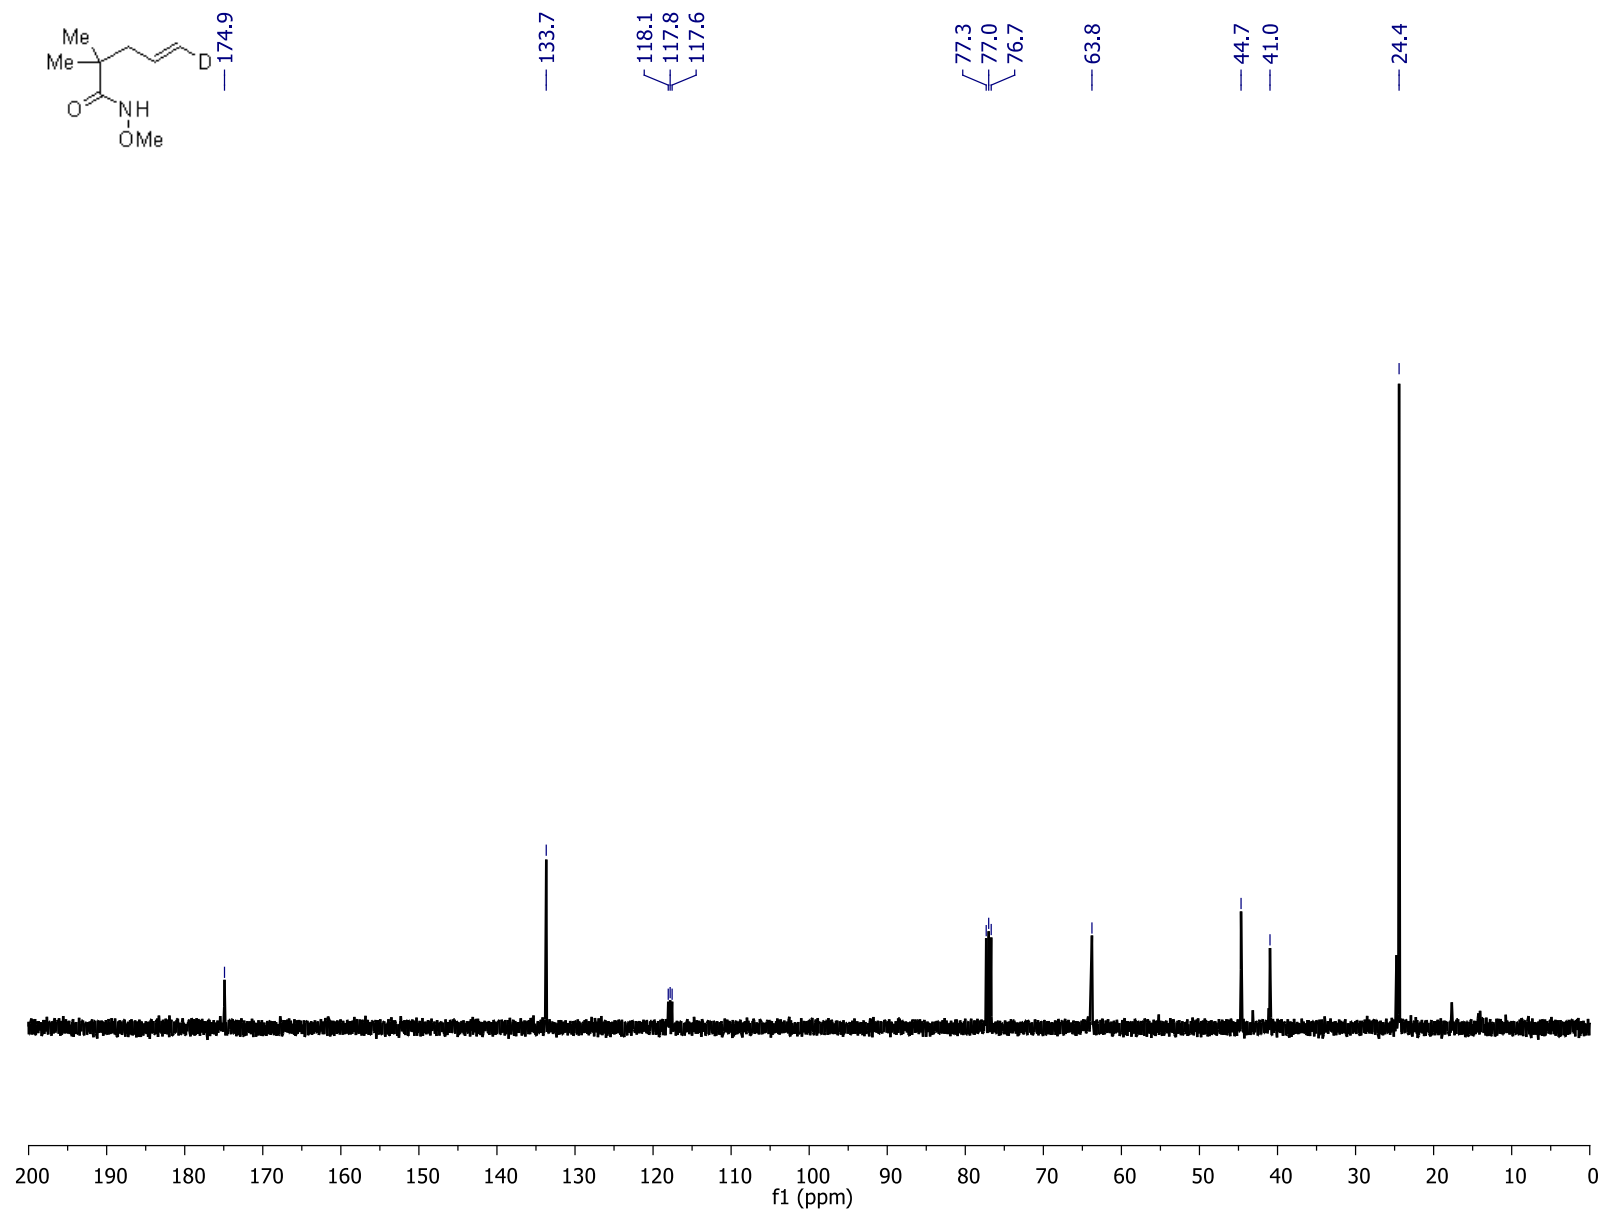

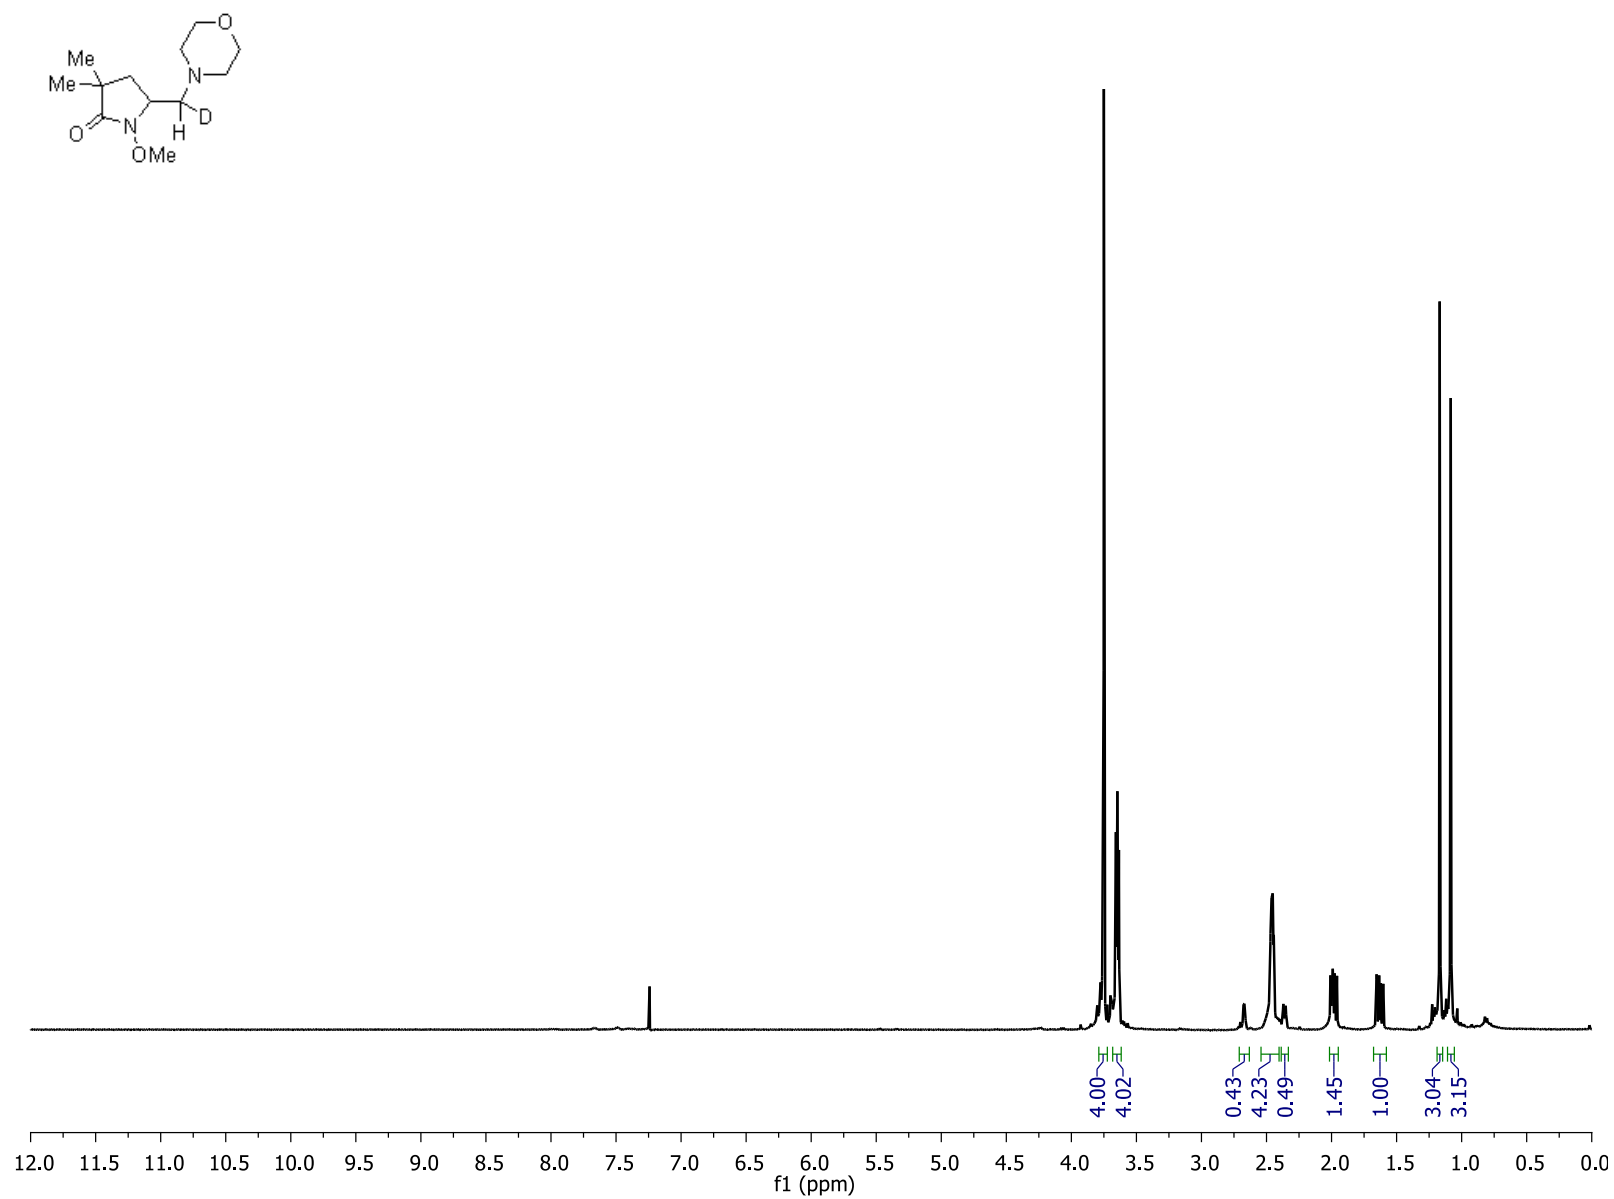

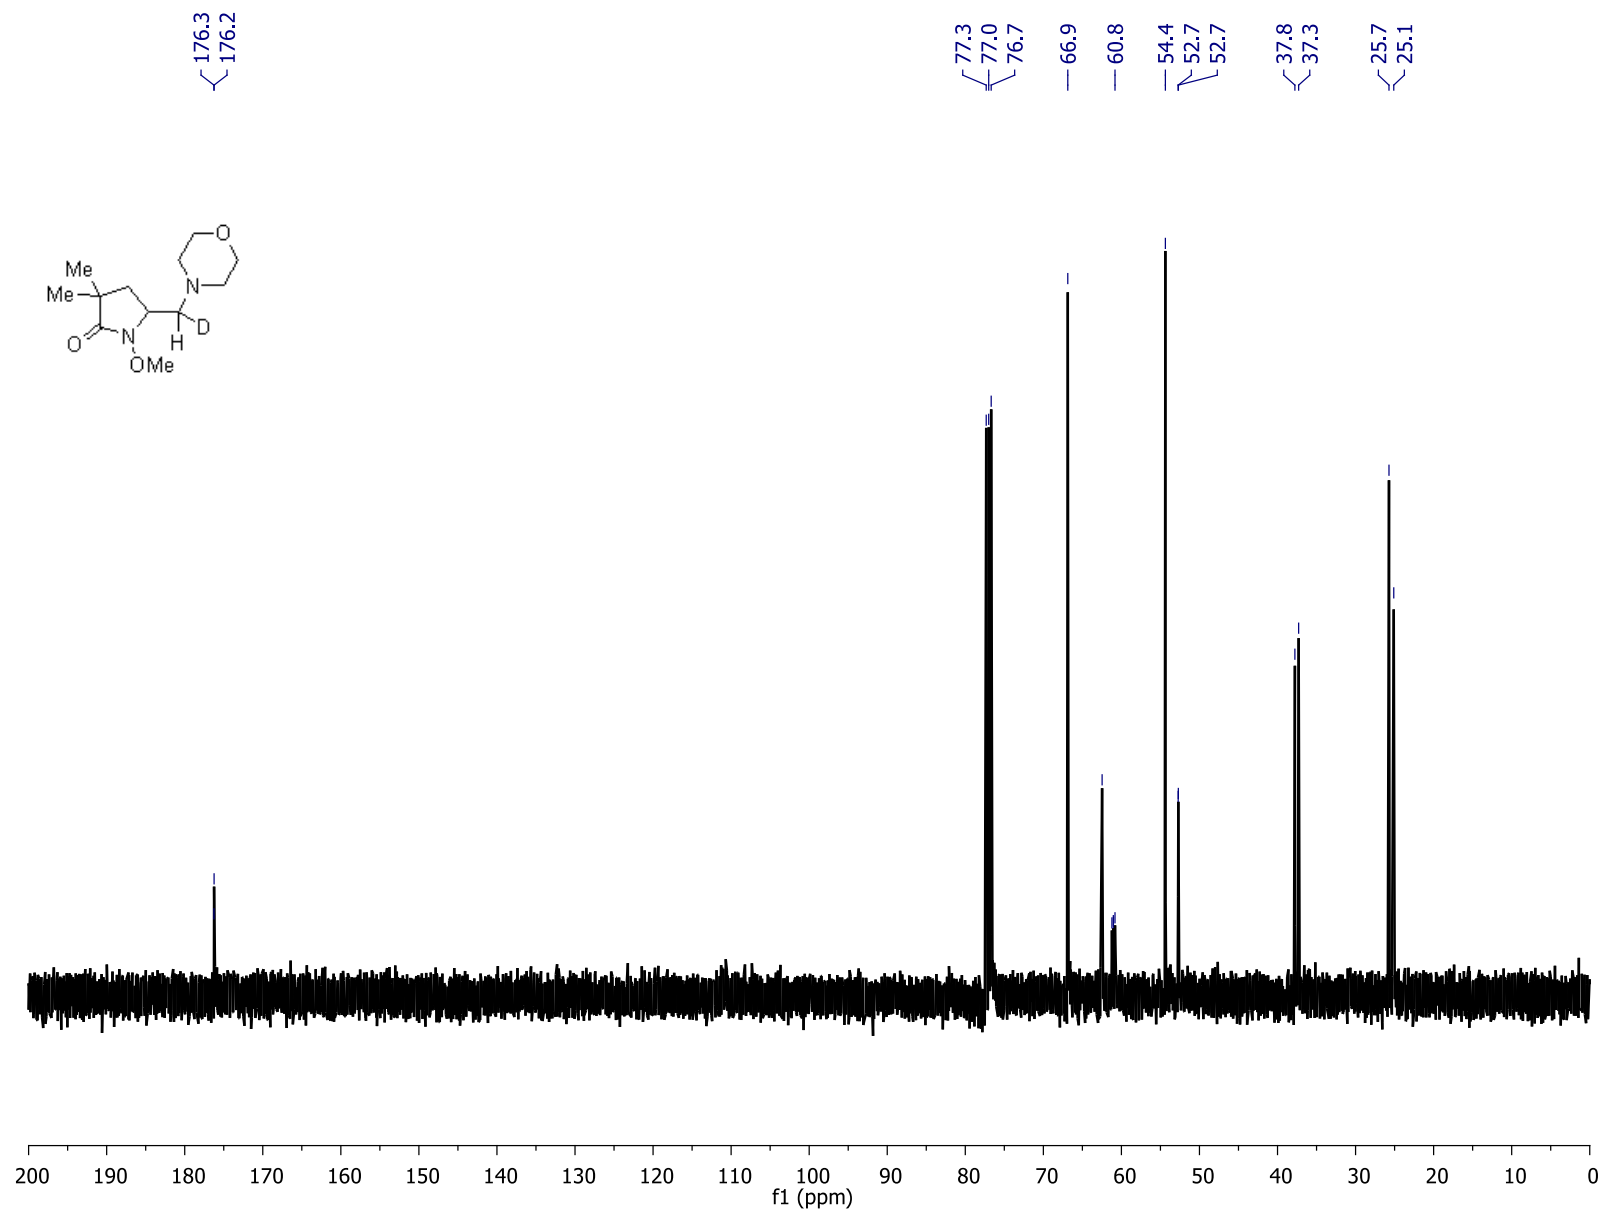

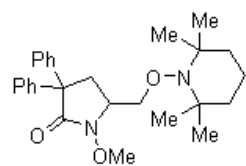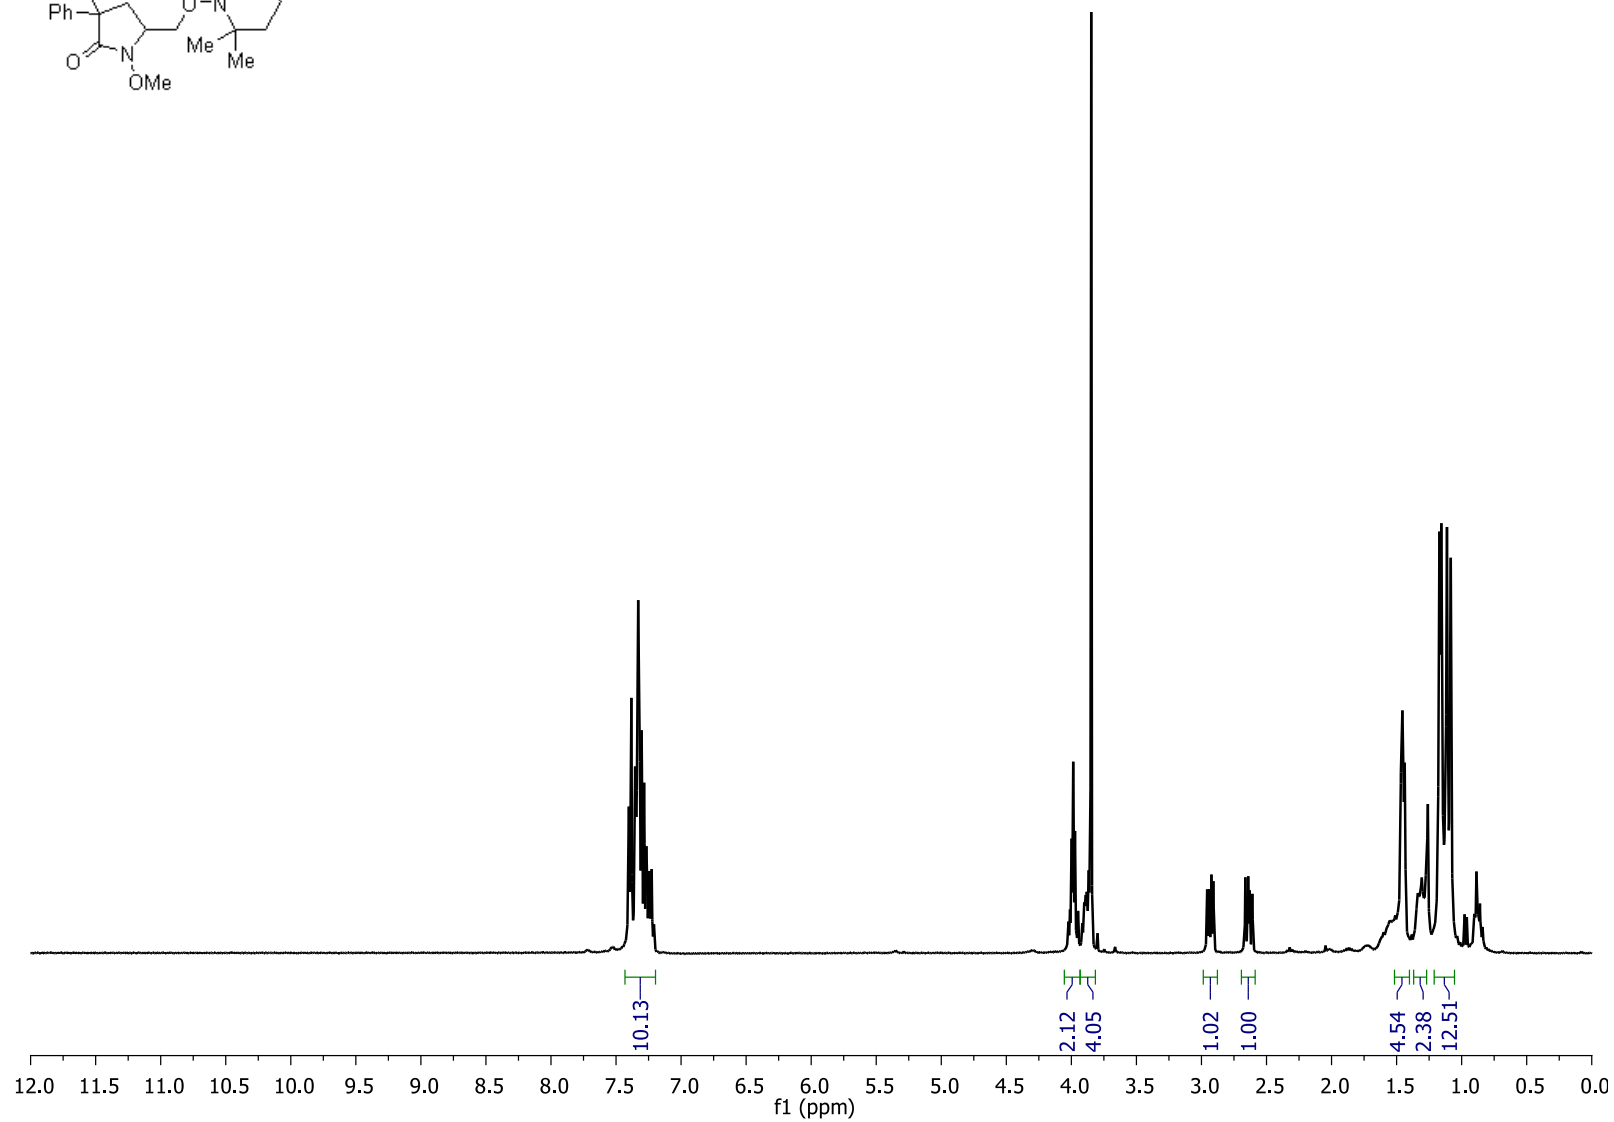





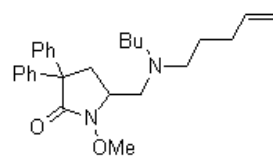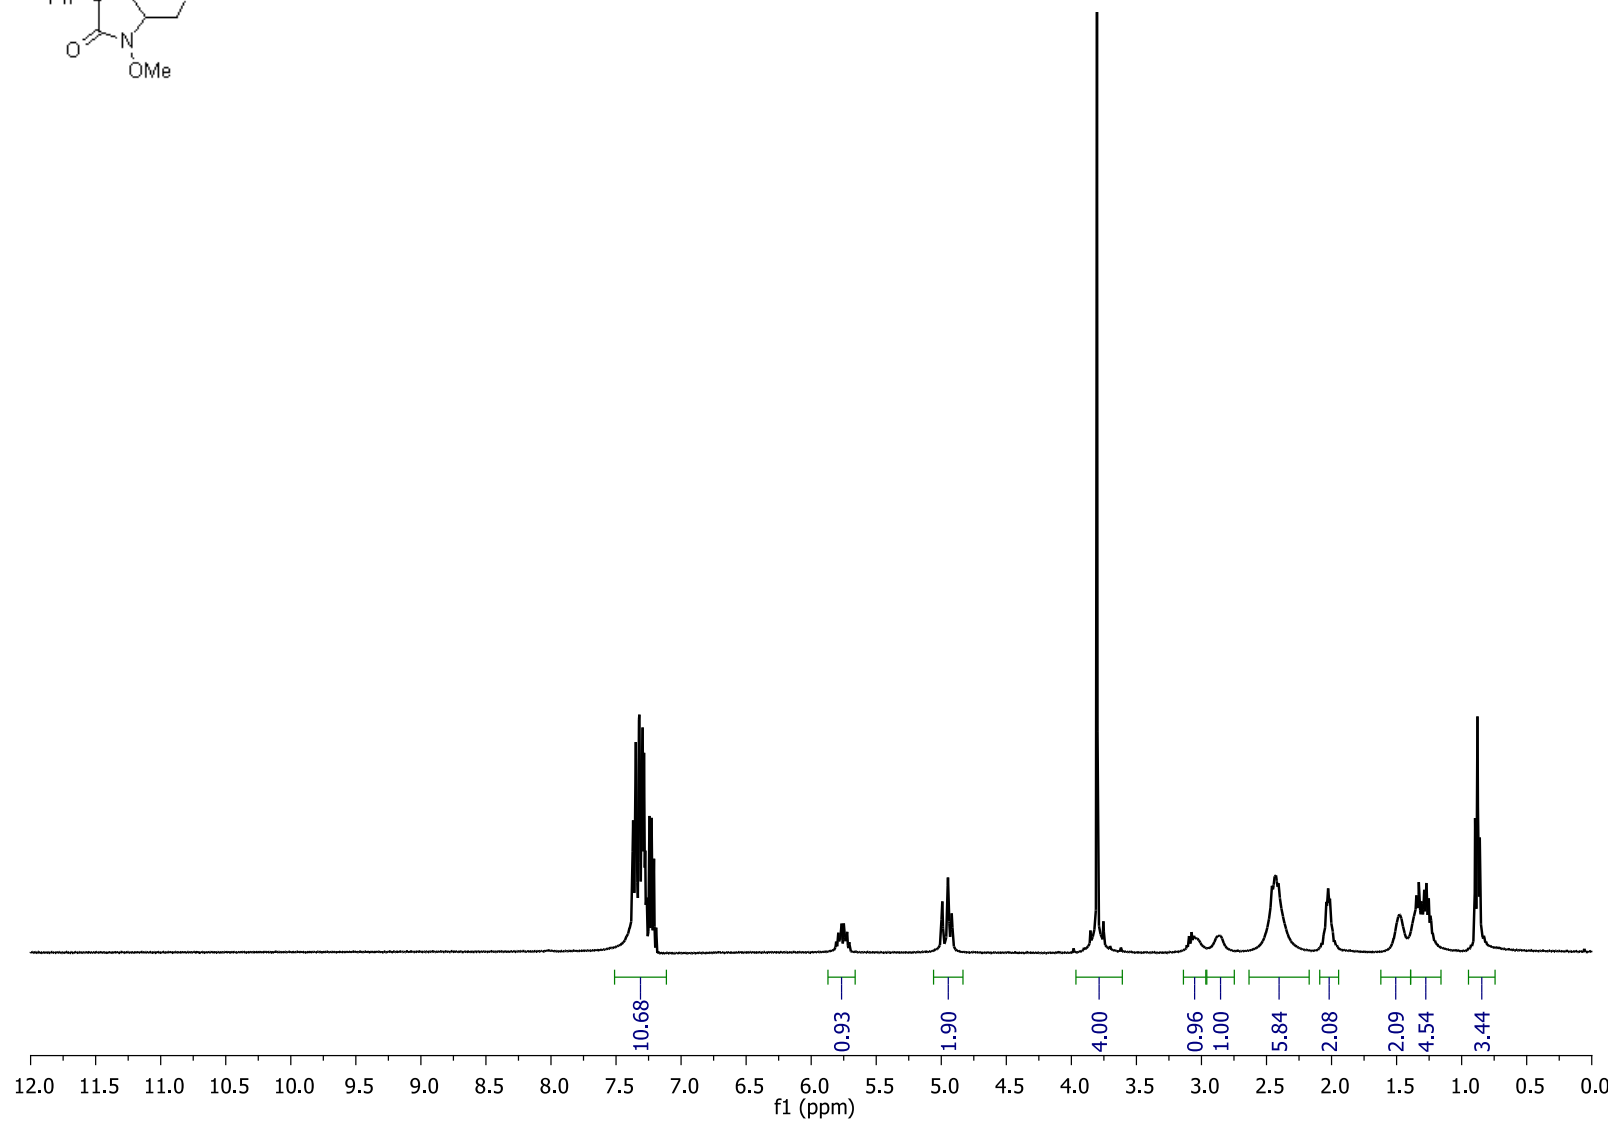

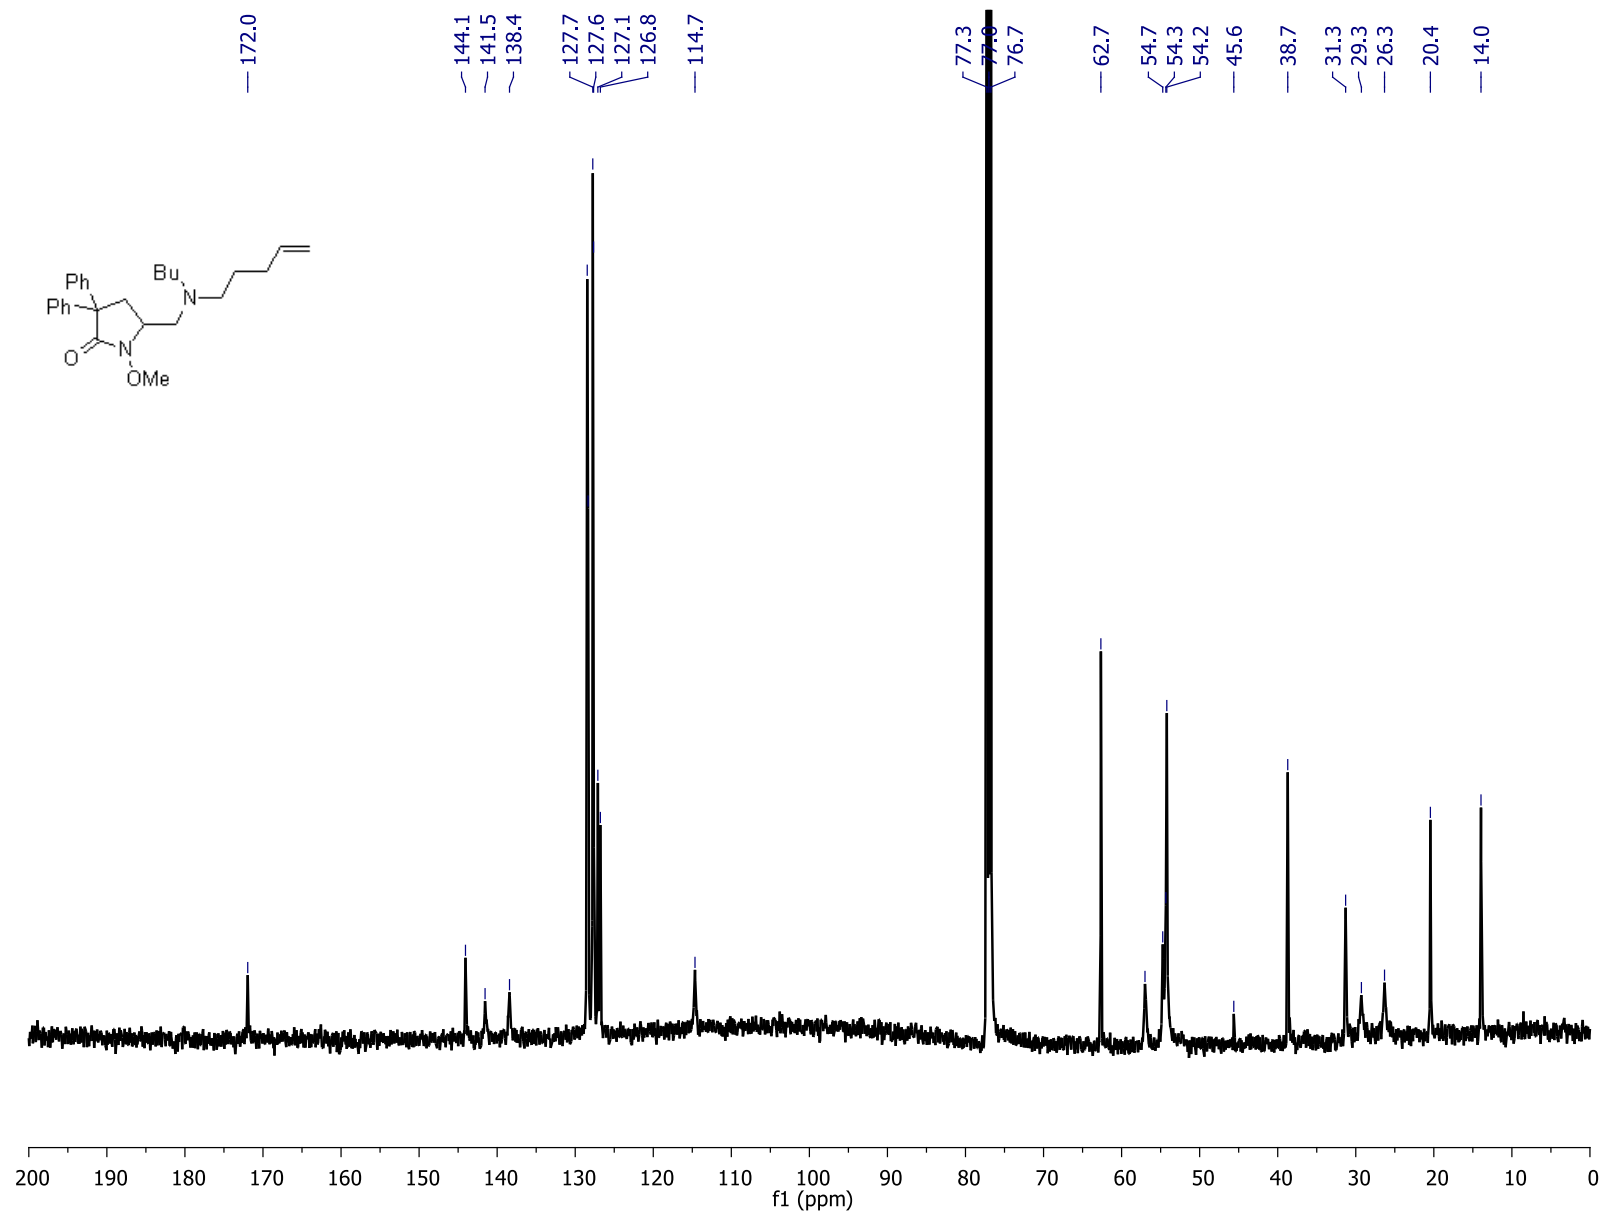

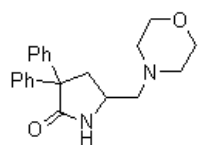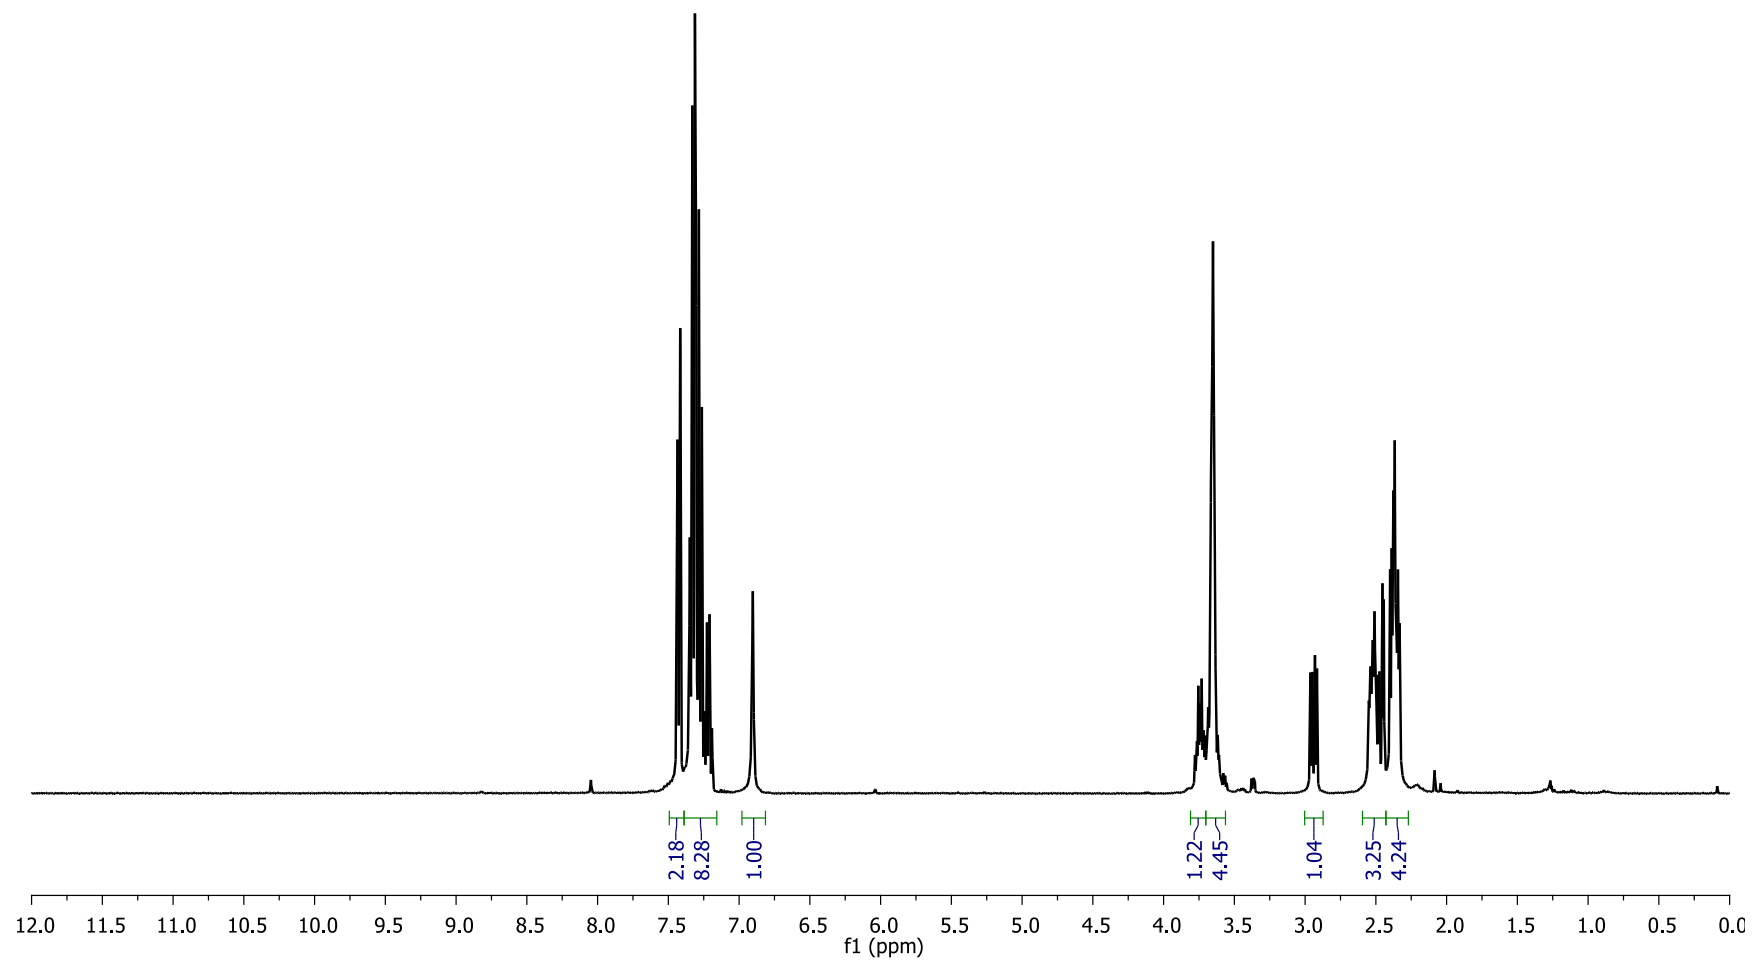

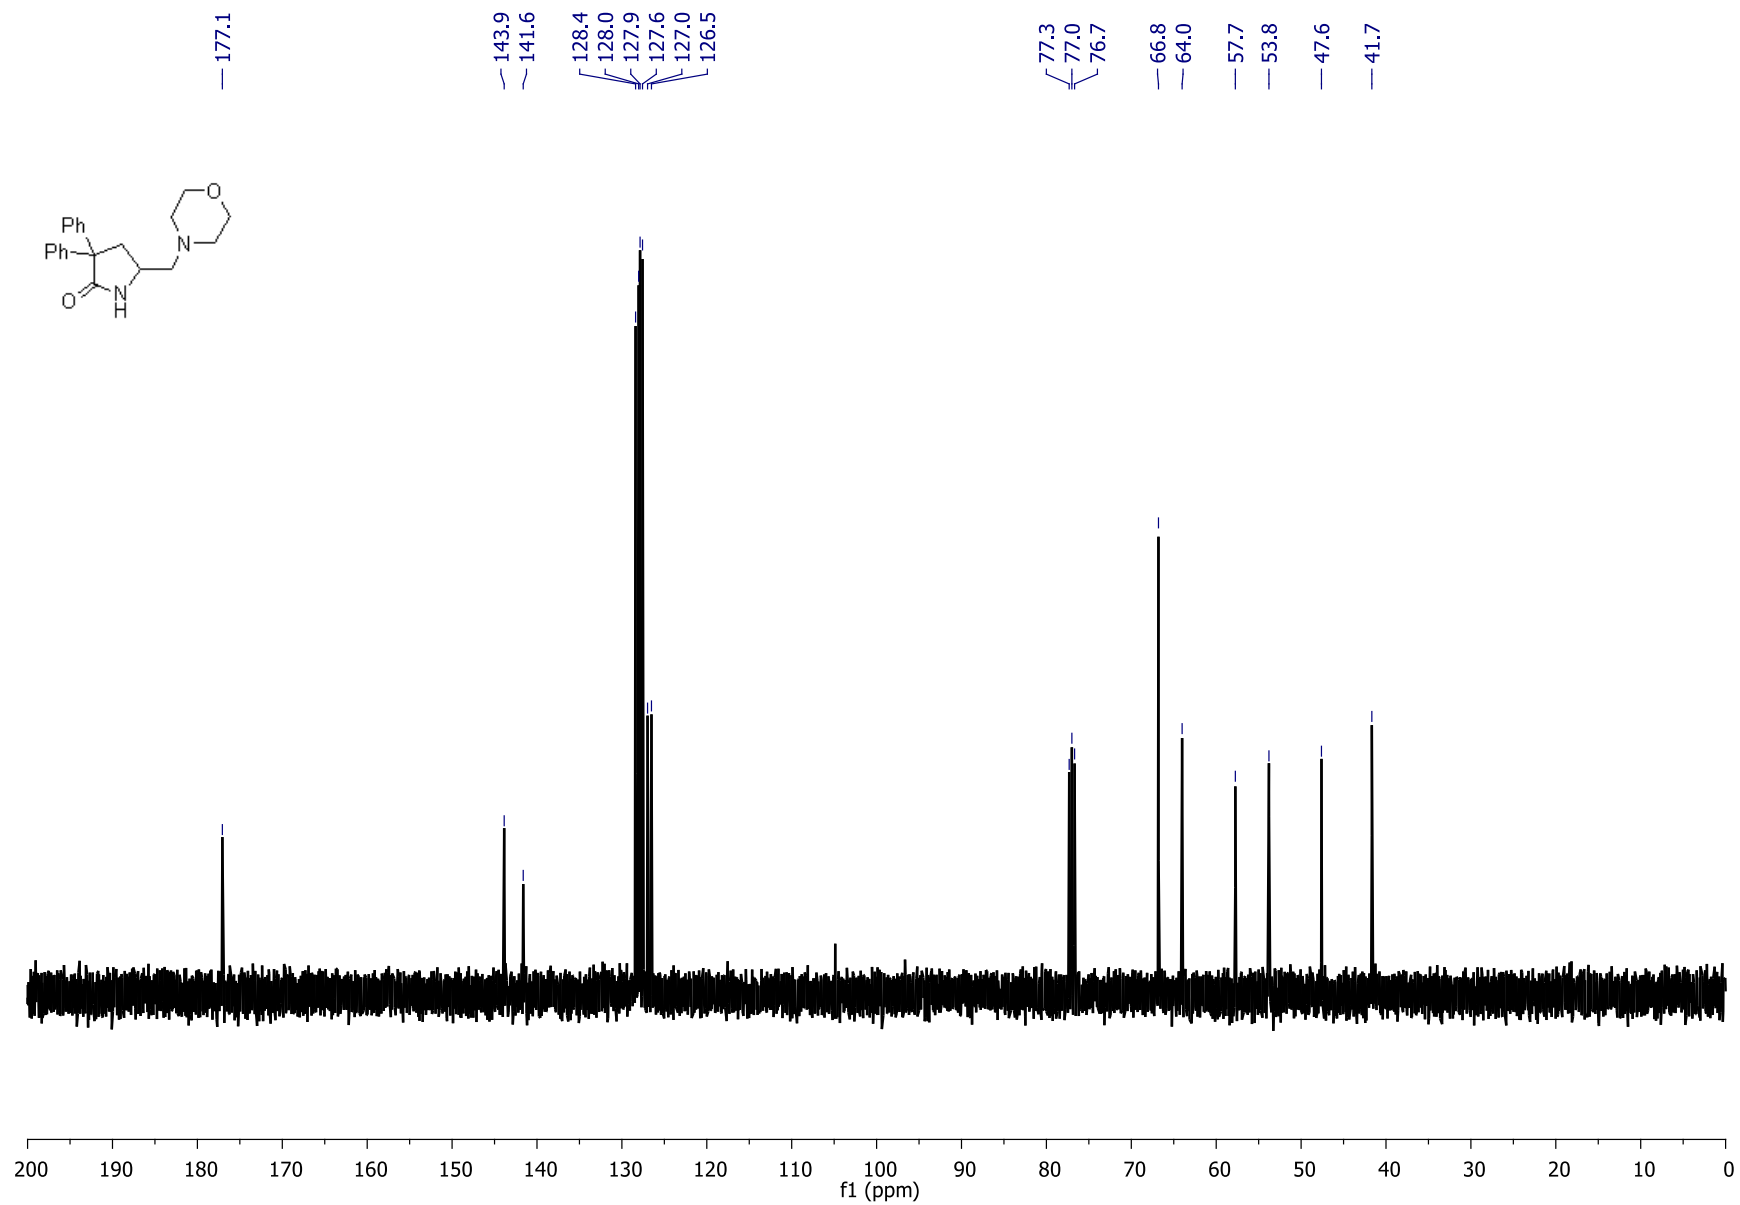

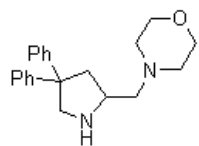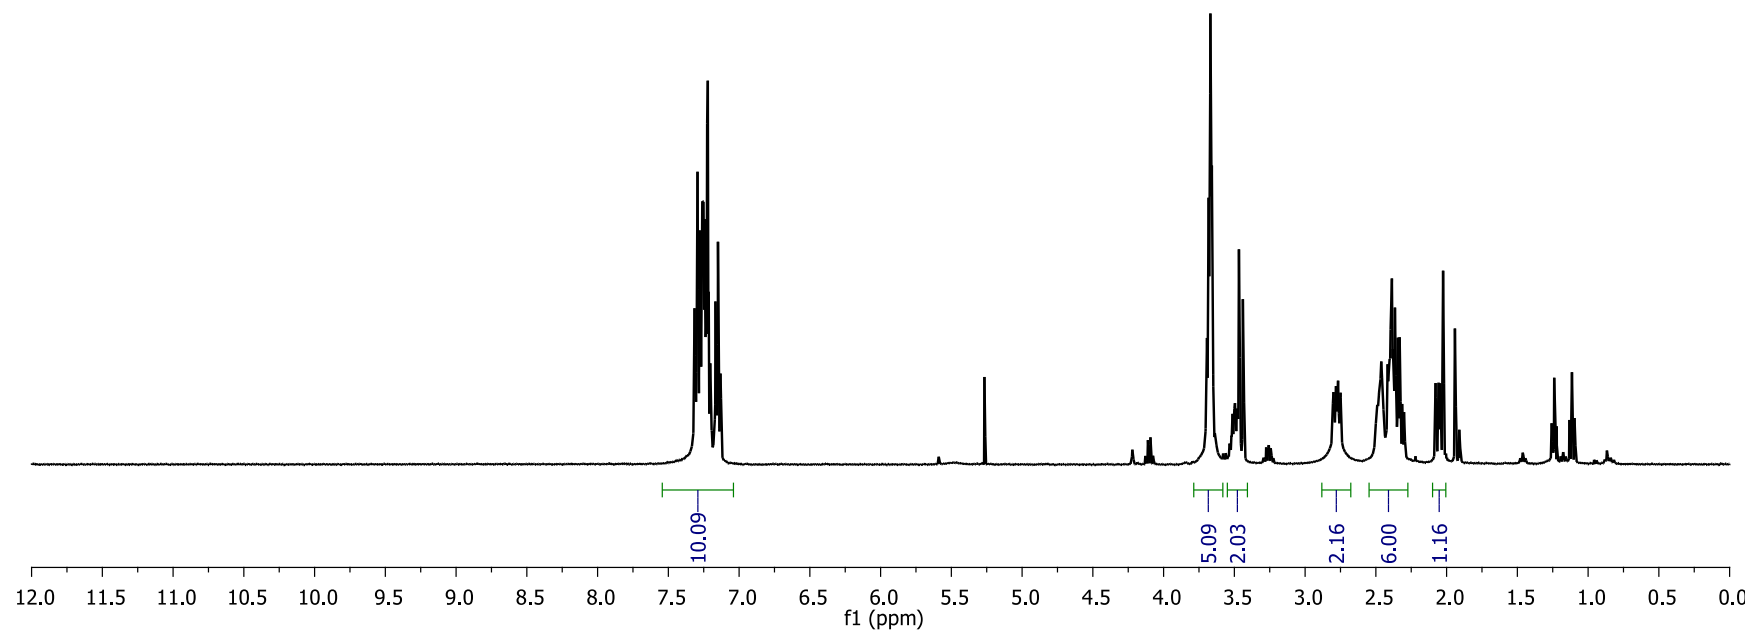

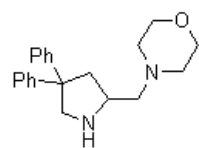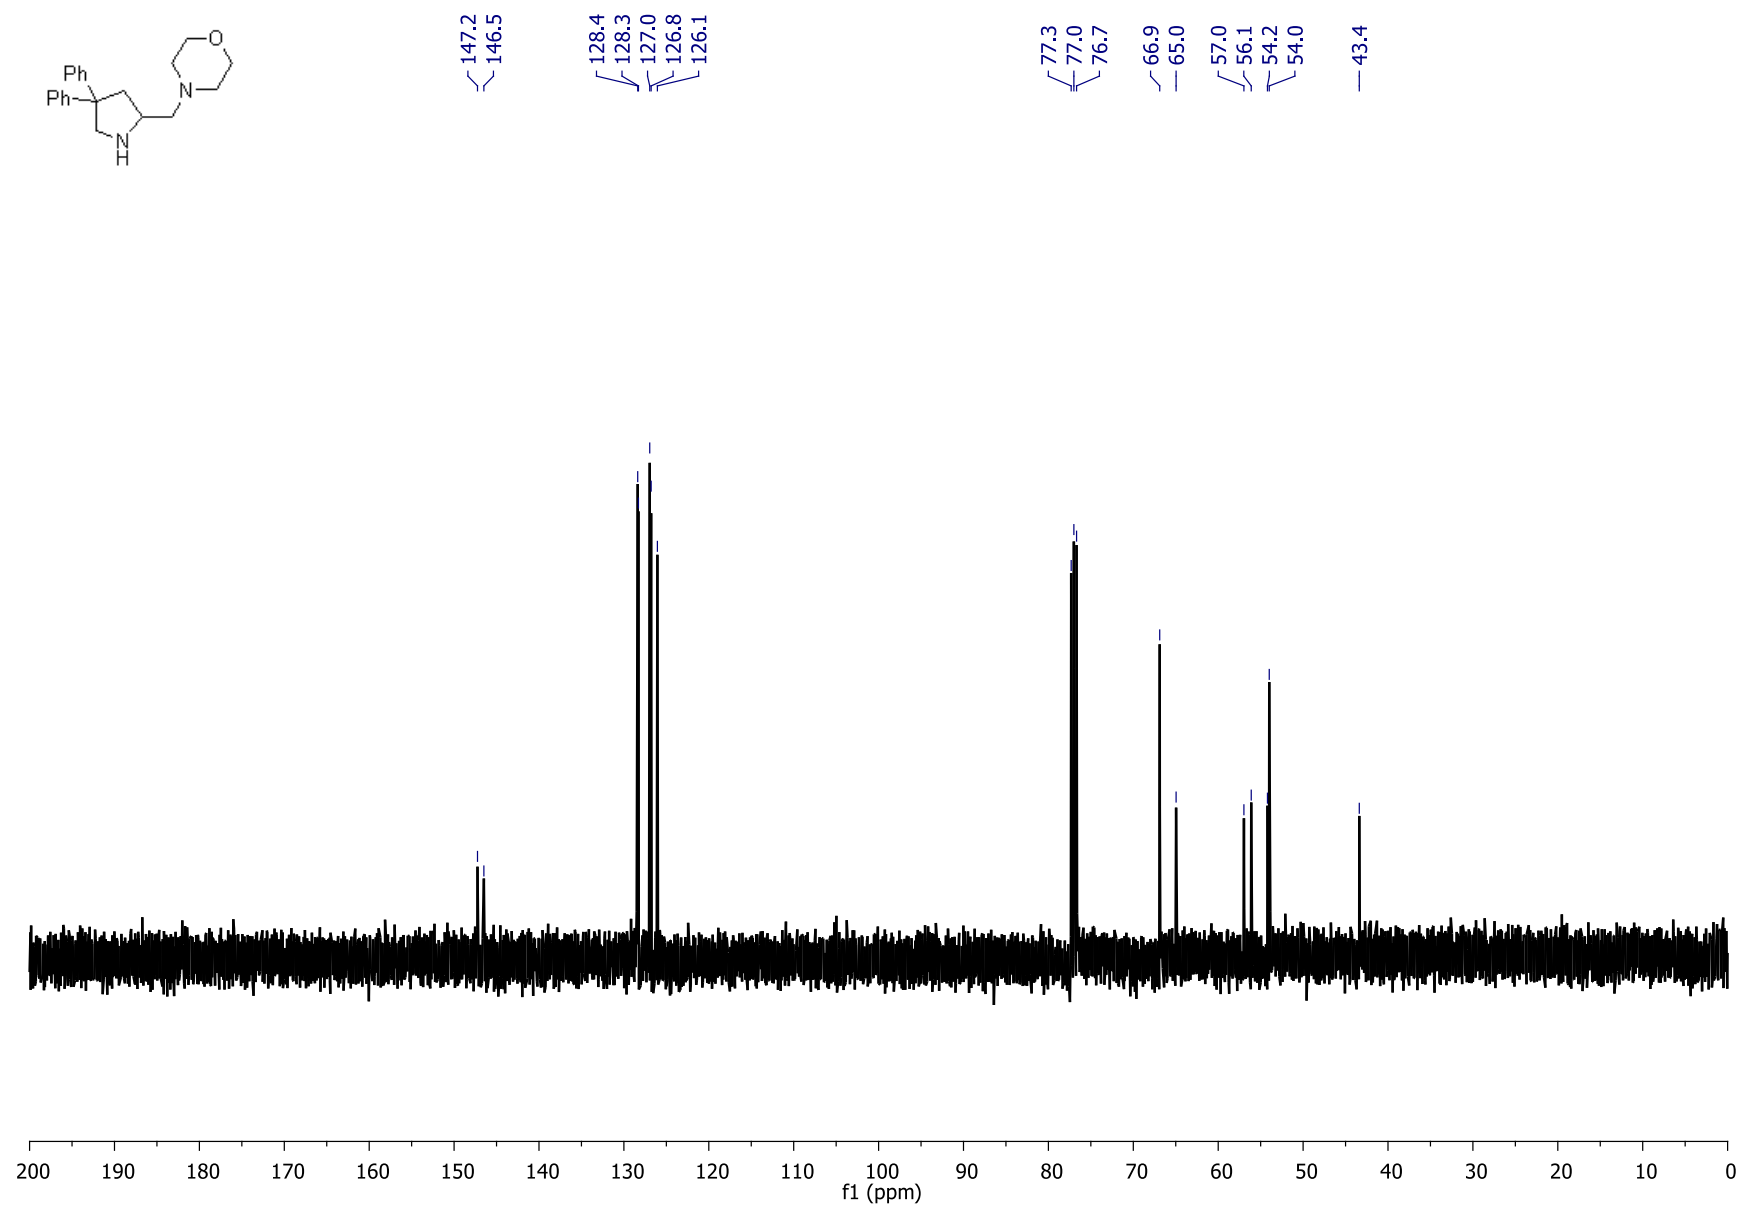

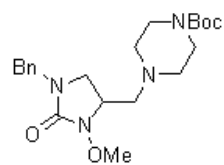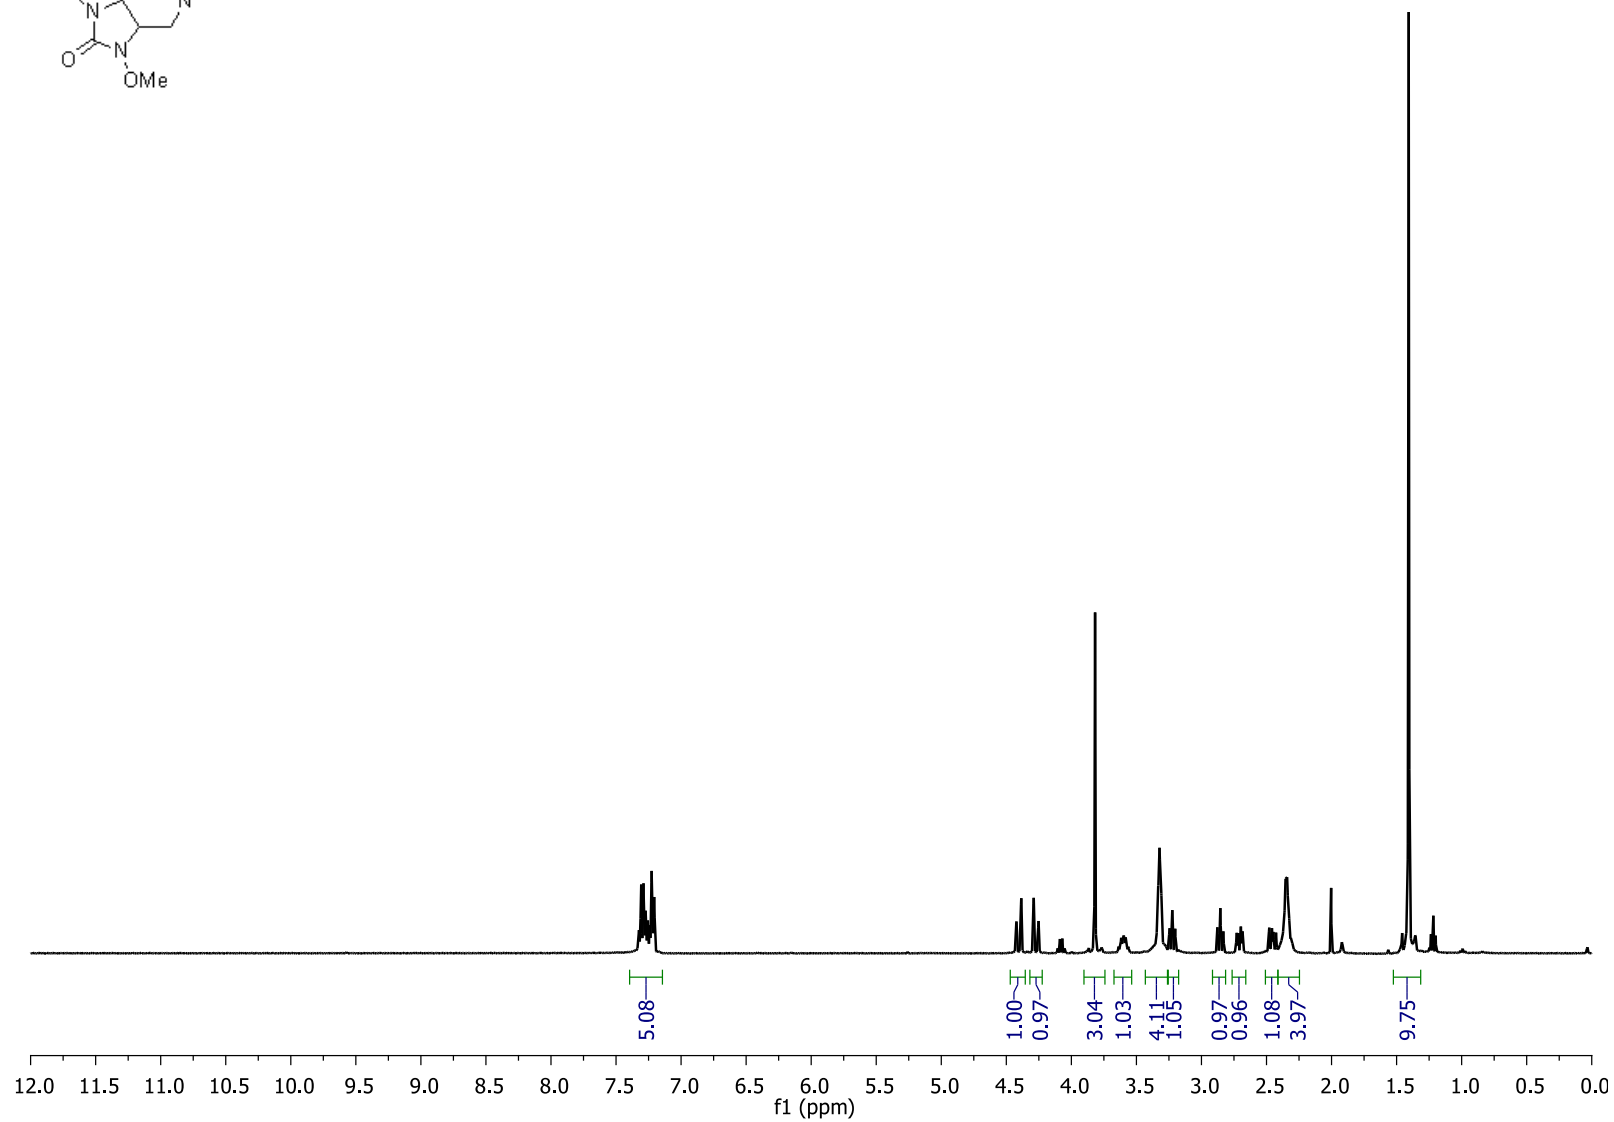



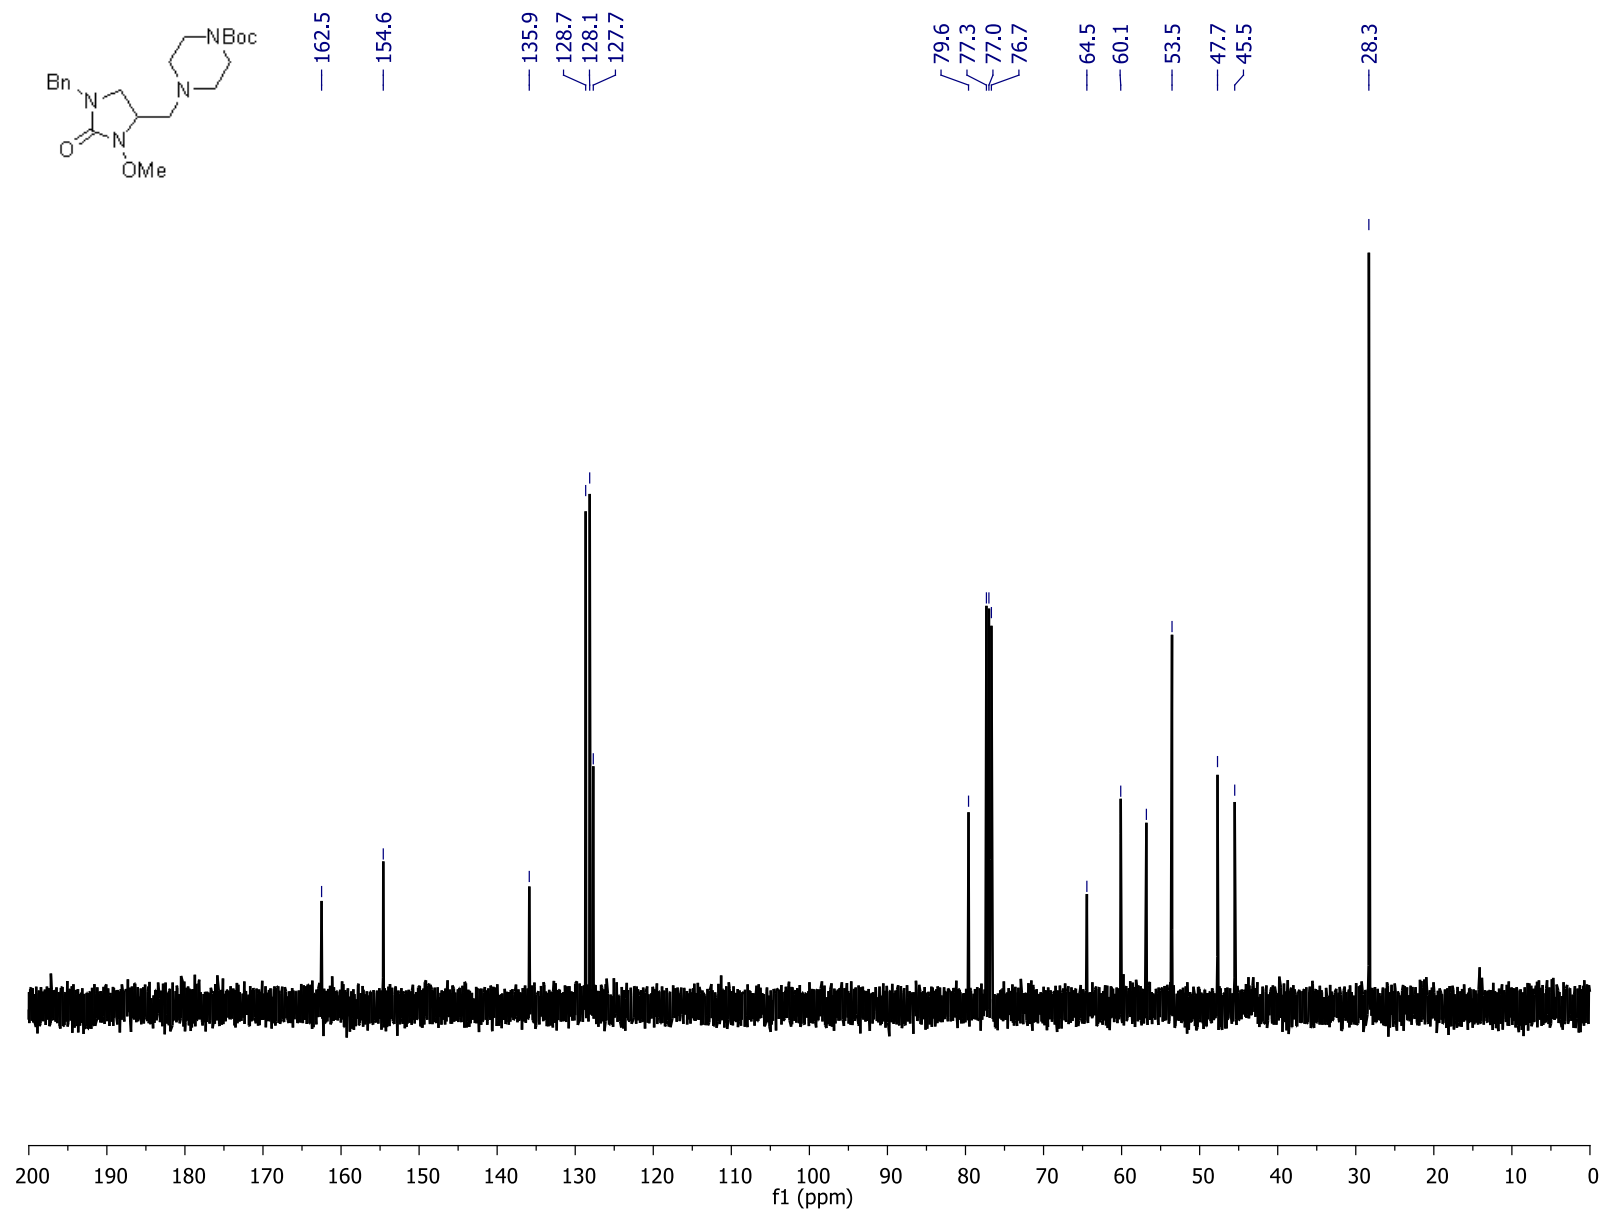

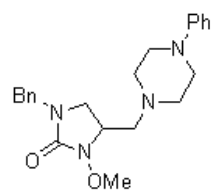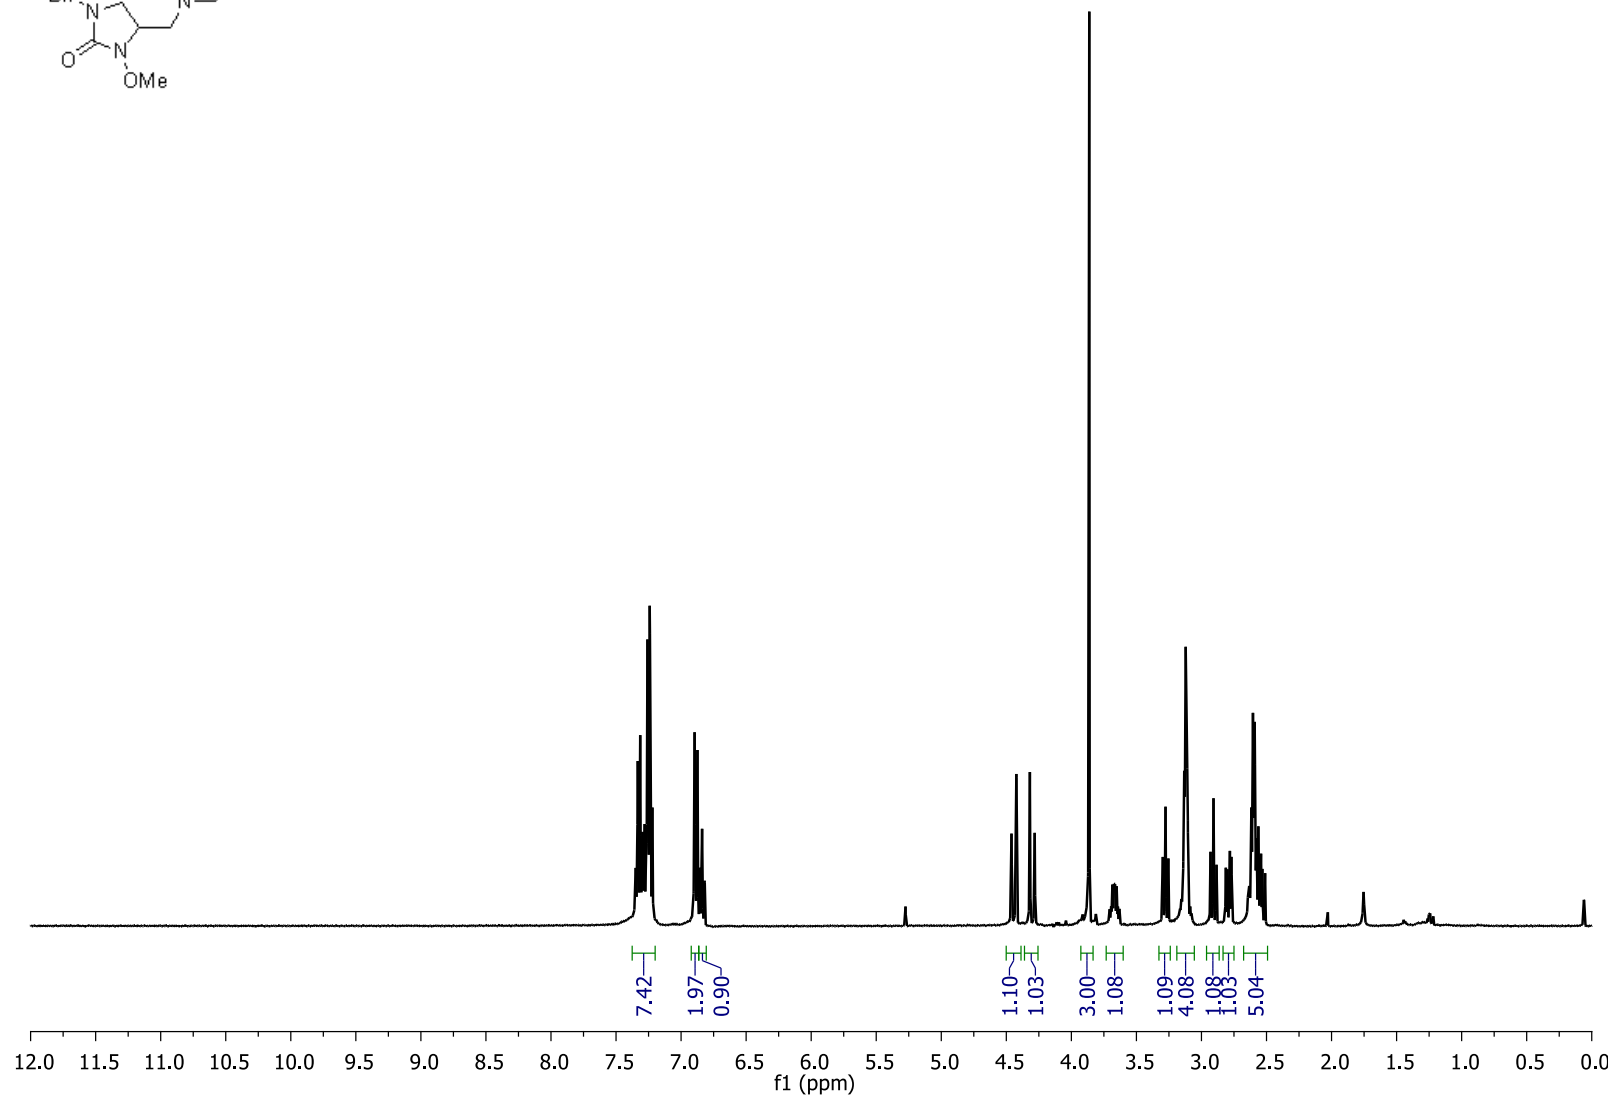

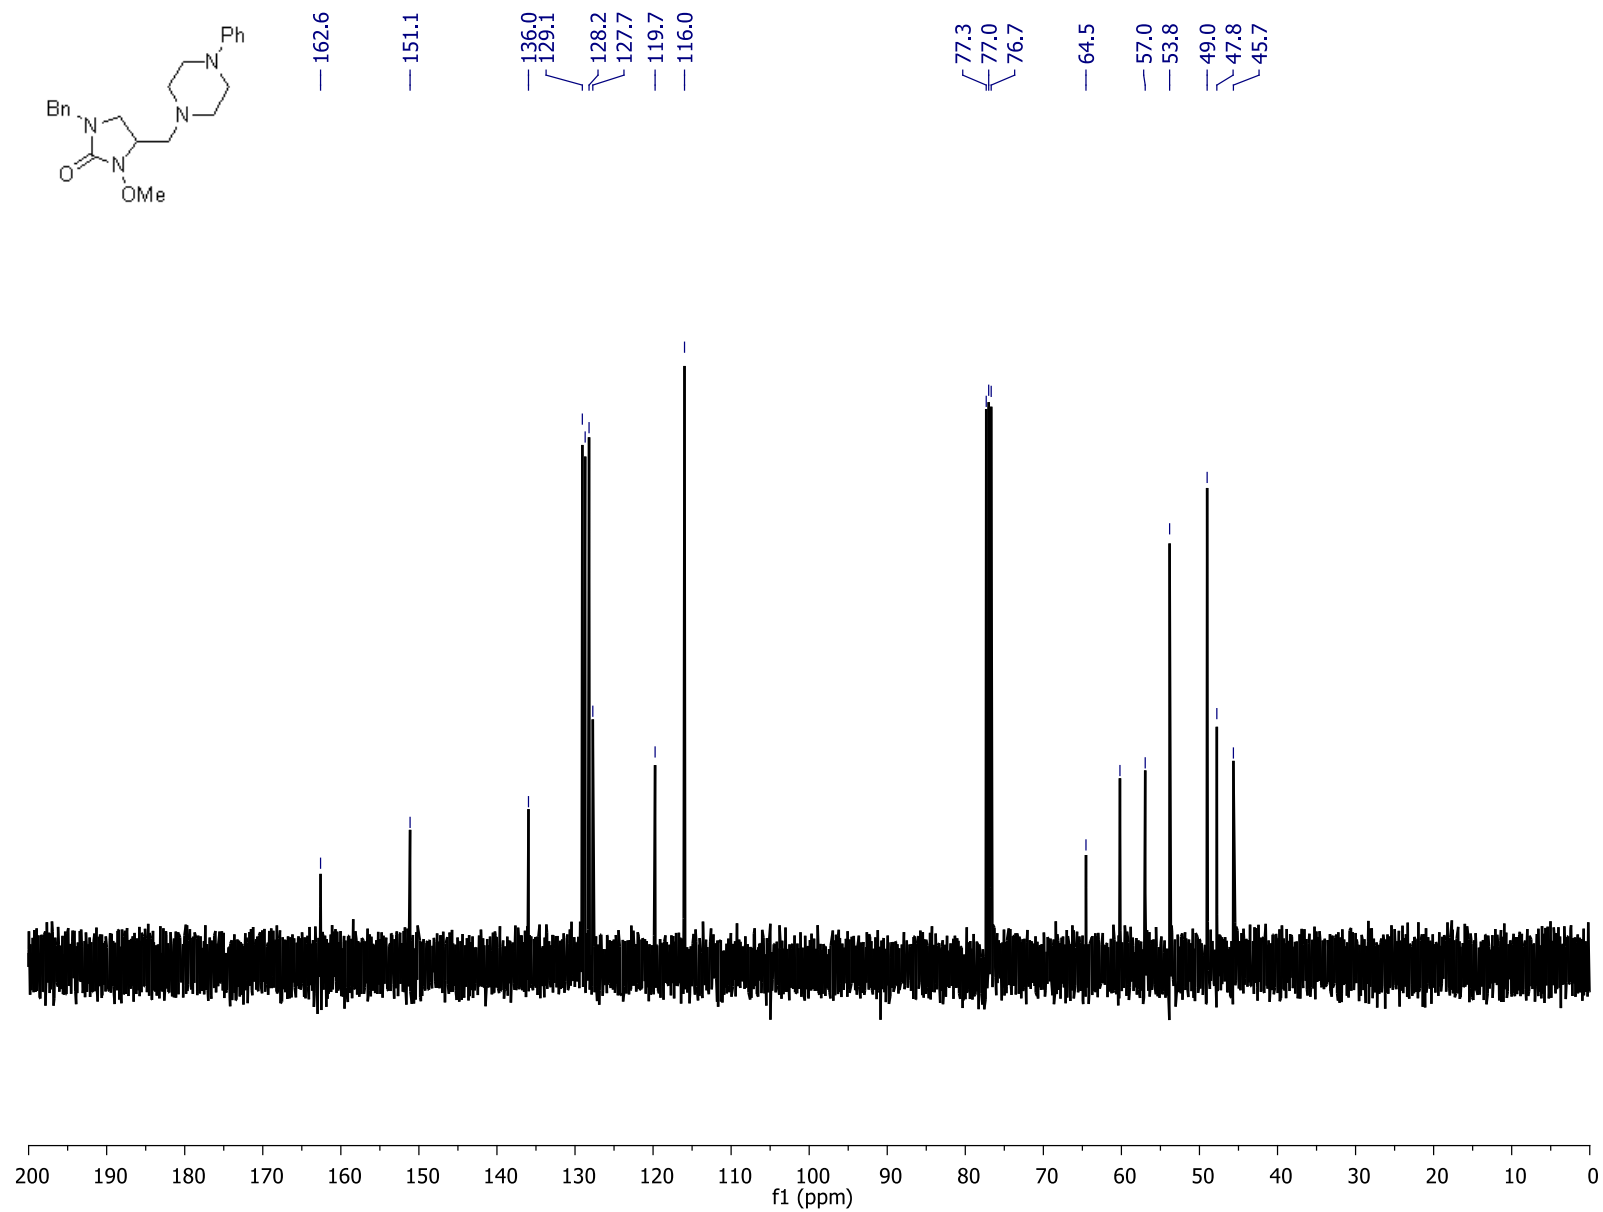

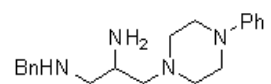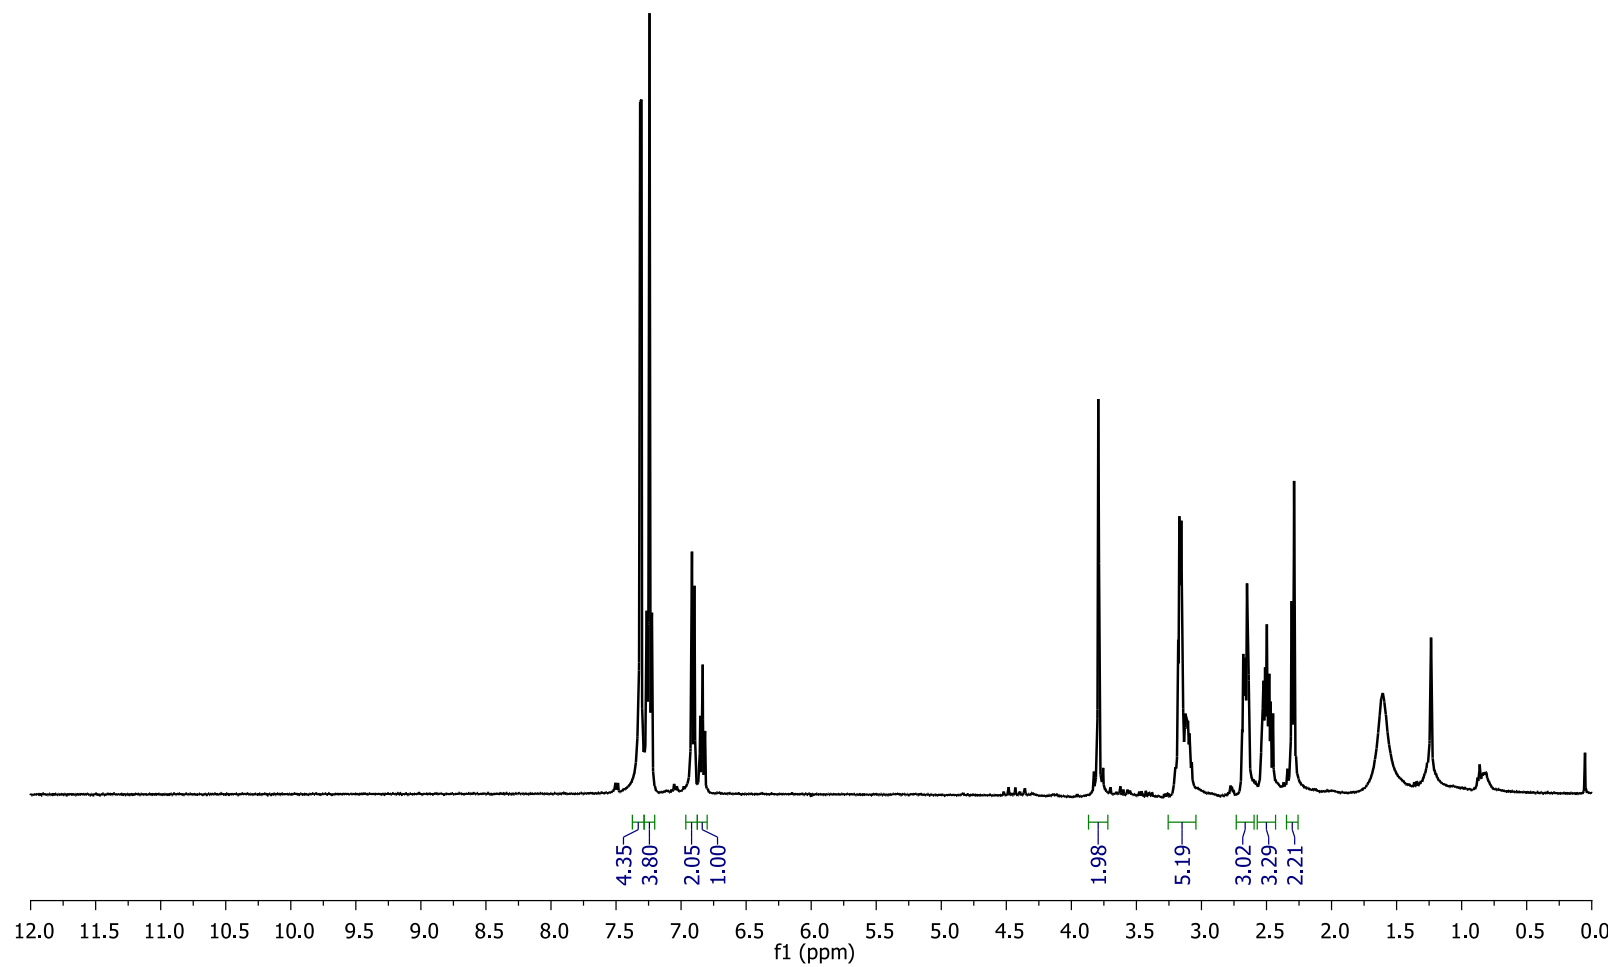

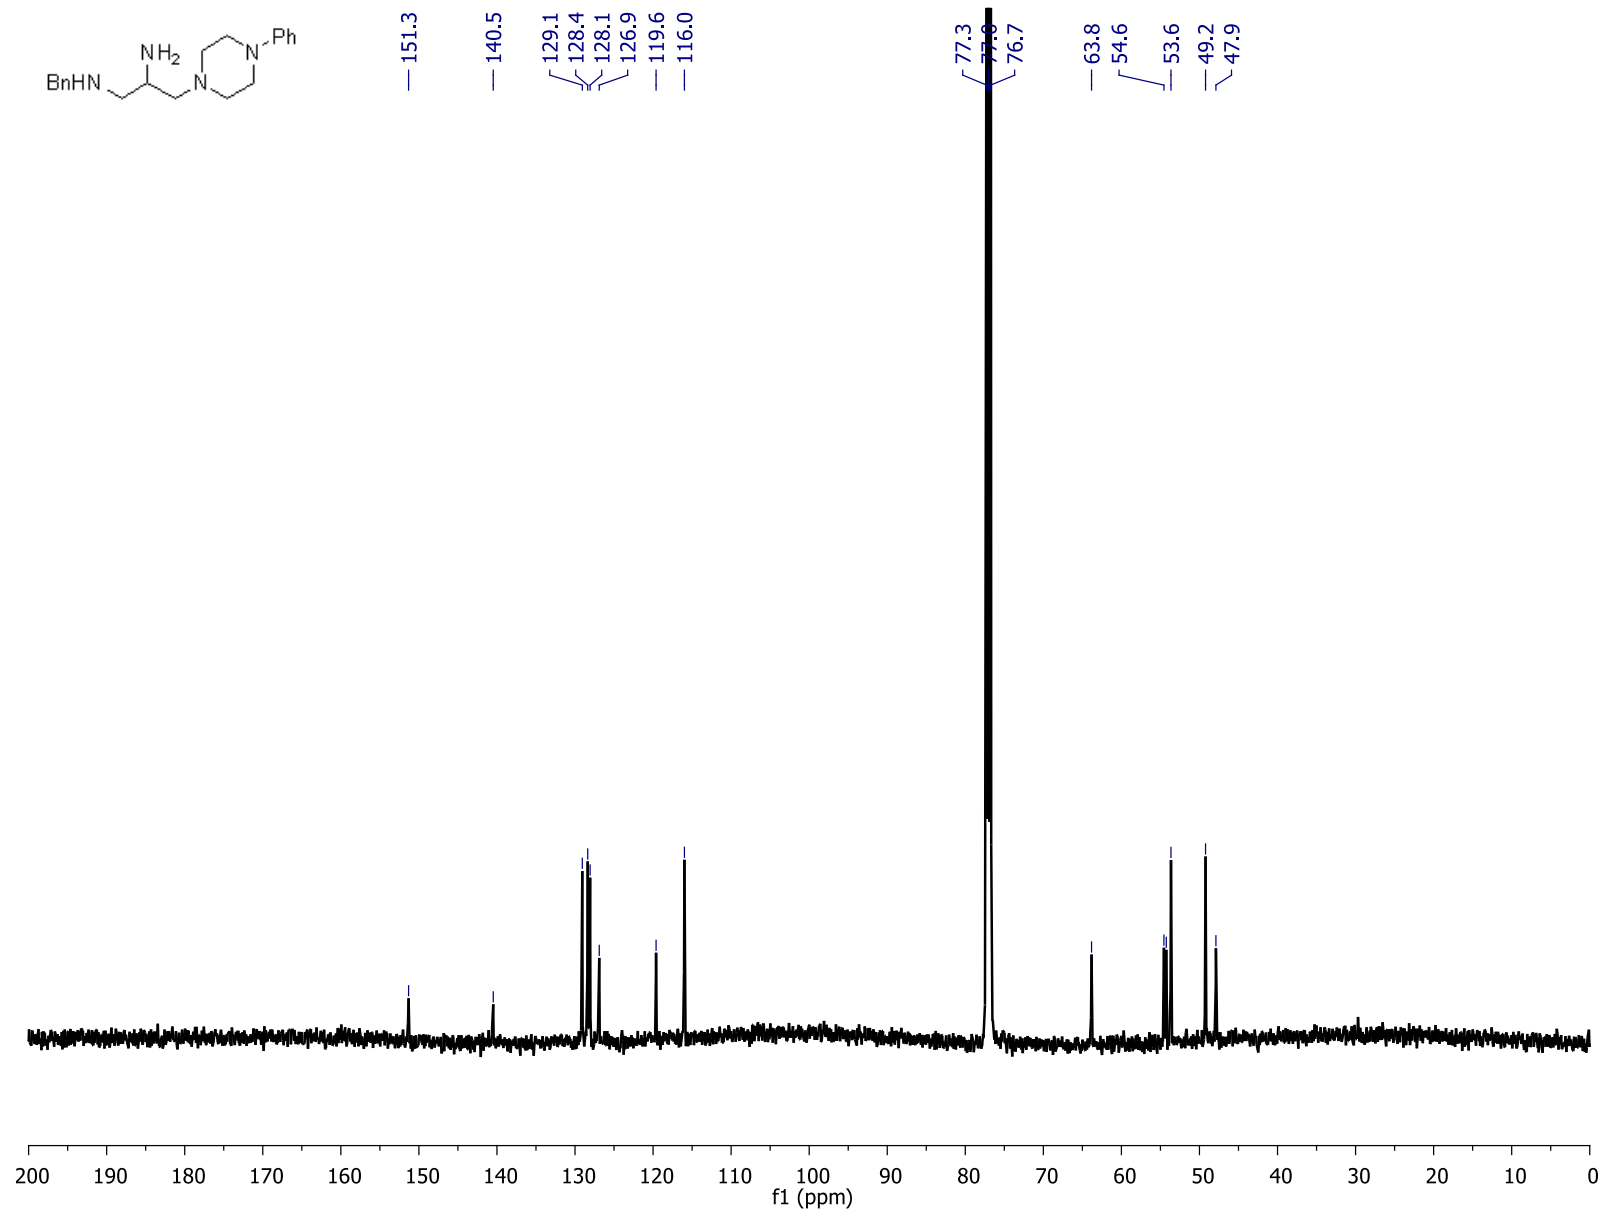

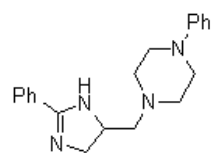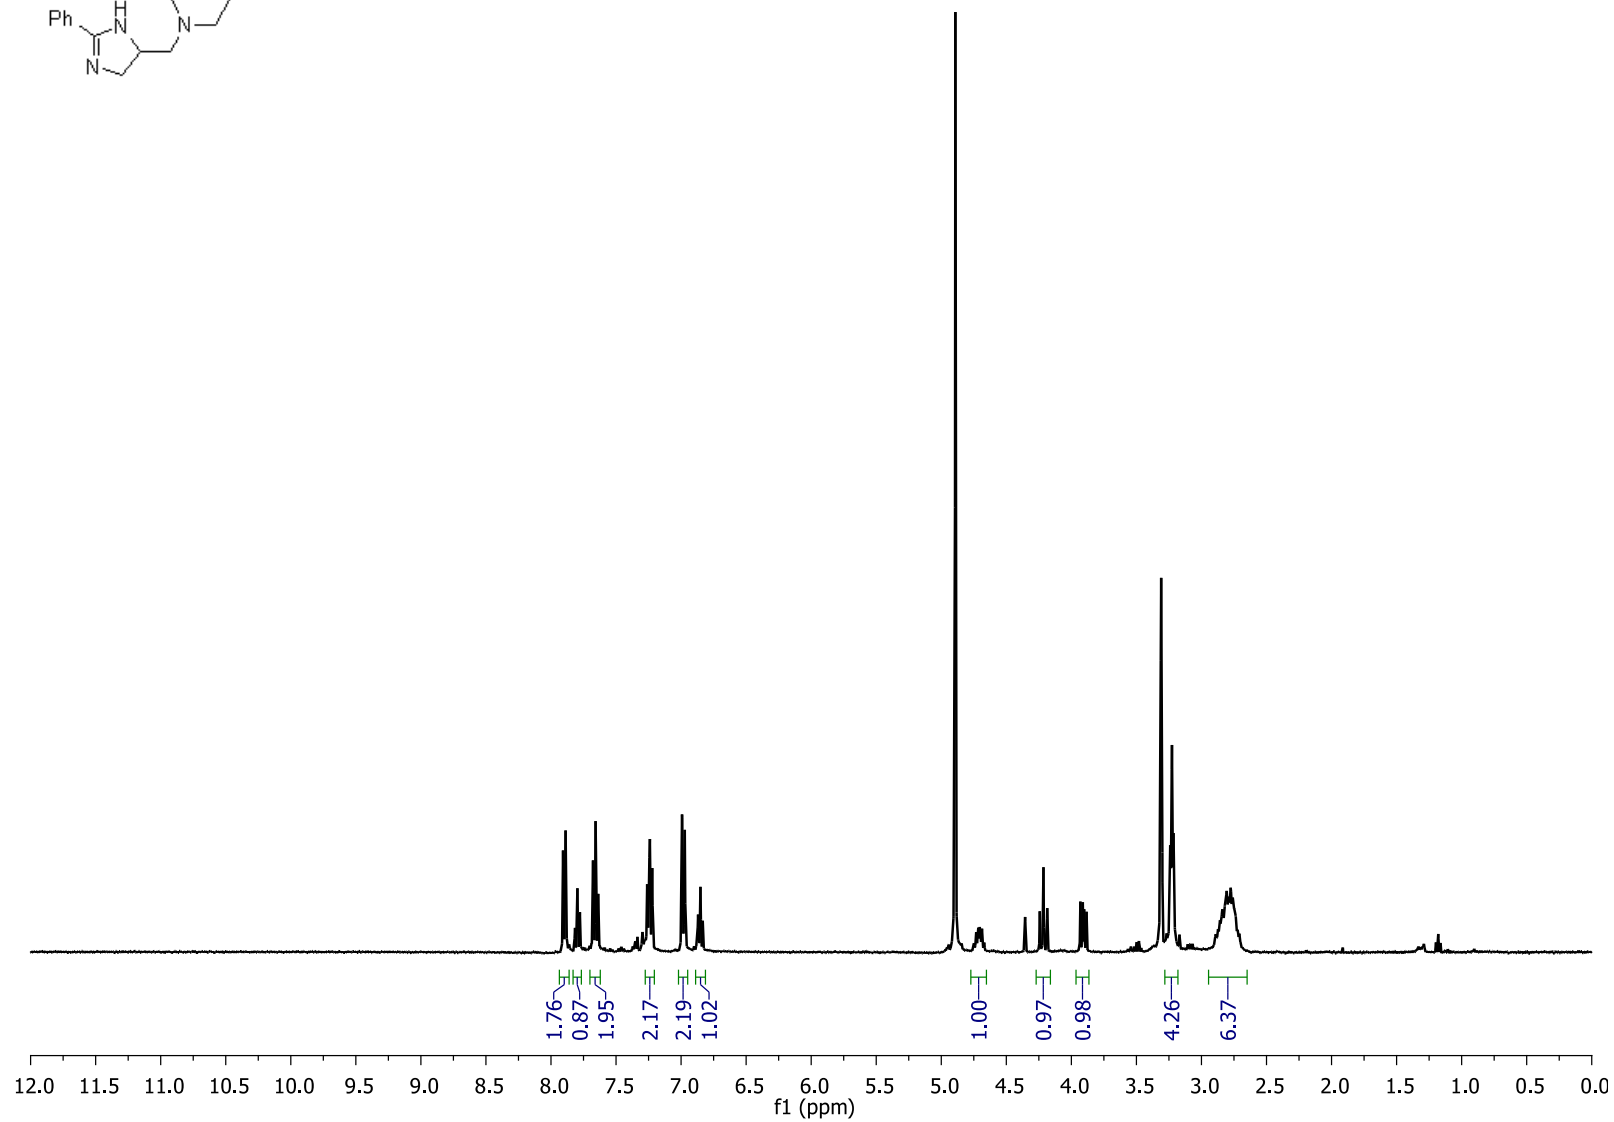

Supplement: c5sc00897b1.pdf [file c5sc00897b1.pdf]
